# Supplementary material for: Unraveling Molecular Differences of Gastric Cancer by Label-Free Quantitative Proteomics Analysis
Source: Int J Mol Sci. 2016 Jan 21;17(1):69. doi: 10.3390/ijms17010069 (PMC4730314; doi:10.3390/ijms17010069)
Supplement: Supplementary file 1 [file ijms-17-00069-s001.xls]

## Sheet: Table S1A
Table S1A. Normal proteins of three samples.
Accession	Description	ΣCoverage	Σ# Proteins	Σ# Unique Peptides	Σ# Peptides	Σ# PSMs	A6: Area	B6: Area	C6: Area	D6: Area	E6: Area	Score A2	Coverage A2	# Peptides A2	# PSM A2	Score A4	Coverage A4	# Peptides A4	# PSM A4	Score B2	Coverage B2	# Peptides B2	# PSM B2	Score B4	Coverage B4	# Peptides B4	# PSM B4	Score C2	Coverage C2	# Peptides C2	# PSM C2	Score C4	Coverage C4	# Peptides C4	# PSM C4	Score D2	Coverage D2	# Peptides D2	# PSM D2	Score D4	Coverage D4	# Peptides D4	# PSM D4	Score E2	Coverage E2	# Peptides E2	# PSM E2	Score E4	Coverage E4
F8WEG2	Uncharacterized protein OS=Homo sapiens GN=GORASP2 PE=4 SV=1 - [F8WEG2_HUMAN]	100	3	1	3	8	0	0	0	1.11433e+07	96920.4																													1.64699	100	3	4					1.96926	34.38
P60602	Reactive oxygen species modulator 1 OS=Homo sapiens GN=ROMO1 PE=1 SV=1 - [ROMO1_HUMAN]	96.2	1	1	5	12	128631	0	0	0	1.0736e+07					0	63.29	2	3					0	25.32	1	1					0	55.7	2	3													0	40.51
P80723	Brain acid soluble protein 1 OS=Homo sapiens GN=BASP1 PE=1 SV=2 - [BASP1_HUMAN]	92.07	2	15	18	357	4.67493e+06	3.64553e+06	3.00859e+06	7.50978e+07	6.18988e+07	248.714	56.83	8	14	48.8666	69.16	9	18	416.92	57.27	9	24	73.2752	67.4	11	28	318.609	51.1	8	16	53.1606	61.23	10	21	639.969	79.3	13	31	100.8	90.31	15	40	817.043	66.96	12	36	118.021	66.96
O60262	Guanine nucleotide-binding protein G(I)/G(S)/G(O) subunit gamma-7 OS=Homo sapiens GN=GNG7 PE=1 SV=1 - [GBG7_HUMAN]	89.71	1	2	7	48	560523	696560	610731	23860676	1.65586e+07	50.49	32.35	2	6	12.7384	39.71	2	5	37.45	32.35	2	5	6.00326	23.53	1	2	51.21	32.35	2	4	5.30448	44.12	2	3	81.39	23.53	1	2	6.75278	23.53	1	2	80.1	45.59	3	4	6.27543	23.53
P68871	Hemoglobin subunit beta OS=Homo sapiens GN=HBB PE=1 SV=2 - [HBB_HUMAN]	88.44	5	5	13	763	4.62815e+07	4.86629e+07	4.0618e+07	5.16773e+08	5.36248e+08	1011.91	74.15	10	46	102.205	68.71	9	41	1000.74	74.15	10	40	98.4952	68.71	9	39	1041.15	74.15	10	38	92.2615	72.79	10	36	1531.97	74.15	10	57	136.653	68.71	9	57	1481.03	74.15	10	52	136.443	68.71
O14950	Myosin regulatory light chain 12B OS=Homo sapiens GN=MYL12B PE=1 SV=2 - [ML12B_HUMAN]	87.79	2	2	14	263	1.51267e+07	1.94885e+07	1.35459e+07	3.53351e+08	3.72586e+08	529.709	45.35	6	17	55.9137	45.35	7	21	576.575	44.77	6	21	70.5916	59.88	9	26	618.196	45.35	7	20	67.5158	45.35	7	25	254.4	48.84	8	18	51.5227	48.84	8	26	471.919	48.84	8	22	70.2414	48.84
P17661	Desmin OS=Homo sapiens GN=DES PE=1 SV=3 - [DESM_HUMAN]	87.45	12	34	51	1353	7.39872e+07	7.41556e+07	6.61309e+07	4.97022e+08	4.33547e+08	2769.49	70.21	35	127	349.473	72.55	37	141	3162.87	68.94	34	149	384.294	70.64	35	159	2702.2	67.45	34	129	337.193	69.57	35	136	1484.08	62.77	33	81	202.88	68.94	34	90	1648.29	58.94	30	83	220.984	60
B4DMQ5	Uncharacterized protein OS=Homo sapiens GN=RAB2A PE=2 SV=1 - [B4DMQ5_HUMAN]	87.23	4	5	14	157	1.31414e+06	1.30886e+06	992200	3.42277e+07	3.16374e+07	105.25	20.74	3	6	16.536	20.74	3	6	113.73	20.74	3	6	15.551	34.57	4	7	137.14	20.74	3	5	15.3644	20.74	3	6	245.402	37.23	6	15	35.0984	54.79	8	18	201.821	40.96	7	15	30.9658	54.79
P07951-2	Isoform 2 of Tropomyosin beta chain OS=Homo sapiens GN=TPM2 - [TPM2_HUMAN]	86.97	7	5	44	1086	8.47798e+07	8.05757e+07	6.89072e+07	2.53527e+08	2.43517e+08	1208.9	75	32	111	222.032	75	30	112	1352.01	72.54	29	103	232.415	76.06	30	116	1157.1	72.54	29	96	208.579	72.54	28	98	690.325	69.37	26	60	121.925	71.48	30	63	622.466	65.14	24	59	118.392	75.35
P62820	Ras-related protein Rab-1A OS=Homo sapiens GN=RAB1A PE=1 SV=3 - [RAB1A_HUMAN]	85.85	37	5	18	221	3.98262e+06	4.15927e+06	3.42606e+06	1.2316e+08	1.14832e+08	495.047	45.85	7	17	53.7112	42.44	6	16	530.286	45.37	7	19	54.1262	48.78	8	19	451.552	53.66	8	15	45.1484	56.59	8	15	405.651	40.98	7	14	36.3928	56.1	10	18	408.562	45.37	8	17	41.1123	56.59
P08670	Vimentin OS=Homo sapiens GN=VIM PE=1 SV=4 - [VIME_HUMAN]	83.69	12	32	51	1595	9.17527e+07	9.38006e+07	7.98819e+07	6.68667e+08	6.63132e+08	2950.65	68.88	34	133	346.505	68.24	34	132	3011.94	68.88	34	143	368.527	72.96	35	146	2605.9	68.88	33	135	320.169	70.39	35	143	2448.6	70.39	40	120	297.833	71.24	41	124	2353.94	74.25	39	126	313.691	74.25
P00167-2	Isoform 2 of Cytochrome b5 OS=Homo sapiens GN=CYB5A - [CYB5_HUMAN]	83.67	3	5	7	102	1.52879e+06	1.67127e+06	1.57368e+06	2.90961e+07	2.94327e+07	51.0933	44.9	3	6	15.3726	44.9	3	7	83.61	34.69	2	6	16.9729	43.88	3	8	58.9836	34.69	2	4	10.2606	34.69	2	4	62.77	48.98	3	6	8.62295	48.98	3	7	65.91	55.1	4	7	13.0947	74.49
P61956	Small ubiquitin-related modifier 2 OS=Homo sapiens GN=SUMO2 PE=1 SV=2 - [SUMO2_HUMAN]	83.16	3	1	5	20	0	620732	721622	8.17442e+06	6.35281e+06													0	50.53	2	3					1.70894	12.63	1	2	43.52	10.53	1	2	6.91417	25.26	2	3	40.97	10.53	1	2	6.91135	25.26
P06753-2	Isoform 2 of Tropomyosin alpha-3 chain OS=Homo sapiens GN=TPM3 - [TPM3_HUMAN]	83.06	12	0	34	588	7.91307e+07	7.56389e+07	6.43184e+07	2.44511e+08	2.39648e+08	627.458	47.98	18	51	95.256	54.44	20	53	517.815	52.42	19	51	91.4348	62.1	21	51	460.737	55.65	19	48	89.4052	52.82	18	47	307.455	41.53	15	34	50.2478	45.16	16	31	357.103	44.35	17	37	59.399	40.73
P62987	Ubiquitin-60S ribosomal protein L40 OS=Homo sapiens GN=UBA52 PE=1 SV=2 - [RL40_HUMAN]	82.81	19	5	12	127	6.88098e+06	9.35175e+06	5.69665e+06	6.77358e+07	1.98662e+08	40.4	32.03	4	8	14.7043	32.03	4	7	50.4946	32.03	4	8	13.699	25.78	4	7	65.23	32.03	4	7	13.7871	48.44	7	10	77.8366	39.06	5	9	21.5622	39.06	5	11	63.2	46.09	6	9	20.3504	55.47
P02545-2	Isoform C of Prelamin-A/C OS=Homo sapiens GN=LMNA - [LMNA_HUMAN]	82.52	5	1	60	996	21431590	2.24677e+07	1.9412e+07	6.02521e+07	2.86267e+08	1860.97	57.17	33	101	233.387	59.27	35	109	1905.44	60.14	35	97	230.169	57.69	34	98	1755.73	60.84	33	92	222.88	62.41	34	94	826.057	46.33	24	42	85.3013	54.02	29	54	677.113	40.91	21	40	82.561	46.85
Q9Y427	Putative uncharacterized protein DKFZp586K2222 OS=Homo sapiens GN=DKFZp586K2222 PE=2 SV=2 - [Q9Y427_HUMAN]	82.39	5	7	37	876	7.91307e+07	7.56389e+07	6.43184e+07	2.44511e+08	2.39648e+08	815.168	67.25	27	83	160.367	69.01	26	84	702.623	62.32	26	85	178.303	69.01	28	89	832.739	67.25	27	85	161.856	71.48	27	85	368.506	60.21	23	56	88.8879	60.56	23	51	471.92	51.41	21	53	103.428	59.86
P61106	Ras-related protein Rab-14 OS=Homo sapiens GN=RAB14 PE=1 SV=4 - [RAB14_HUMAN]	82.33	29	9	15	153	2.48627e+06	2.22153e+06	2.40265e+06	8.41776e+07	7.45009e+07	112.047	26.51	3	4	11.159	41.4	5	6	158.29	26.51	3	6	24.545	26.51	3	7	79.51	19.07	2	3	9.2711	19.07	2	3	337.019	50.23	7	18	46.2915	71.16	9	20	372.057	53.95	8	24	63.6818	65.58
P63261	Actin, cytoplasmic 2 OS=Homo sapiens GN=ACTG1 PE=1 SV=1 - [ACTG_HUMAN]	82.13	12	1	29	2933	5.21016e+08	5.05181e+08	4.72775e+08	5.47374e+09	4.76725e+09	4507.33	64	19	217	578.844	74.93	21	245	4505.47	64	19	207	563.019	71.2	22	227	4299.05	64	19	223	589.942	74.93	21	246	3853.12	60.53	20	198	496.656	62.13	21	233	4203.45	53.07	19	206	497.65	62.93
P18206-2	Isoform 1 of Vinculin OS=Homo sapiens GN=VCL - [VINC_HUMAN]	81.71	6	53	92	1075	1.1339e+08	6.17828e+06	1.08253e+08	1.00141e+08	9.44511e+07	1470.75	43.62	36	72	182.776	48.78	42	86	1567.44	40.34	34	70	185.702	51.13	42	80	1533.14	44	36	71	194.841	52.35	42	83	1913.81	51.88	45	92	233.374	59.85	55	115	1914.6	46.9	43	87	210.188	54.5
P08727	Keratin, type I cytoskeletal 19 OS=Homo sapiens GN=KRT19 PE=1 SV=4 - [K1C19_HUMAN]	81.5	15	21	36	452	1.15111e+07	9.09268e+06	7.96227e+06	3.80197e+07	8.26966e+07	875.017	44.25	17	45	108.735	49.75	20	50	919.356	44.5	17	39	94.771	49.5	17	38	864.146	49.75	19	40	95.8699	49	19	40	406.869	31.5	12	19	49.4651	36.75	15	24	414.799	30.25	12	22	46.5776	36.75
P06753-3	Isoform 3 of Tropomyosin alpha-3 chain OS=Homo sapiens GN=TPM3 - [TPM3_HUMAN]	81.38	9	1	33	566	7.91307e+07	7.56389e+07	6.43184e+07	2.44511e+08	2.39648e+08	627.458	51.01	19	52	95.256	51.42	19	51	452.396	47.37	18	50	84.2345	54.25	19	47	457.948	50.61	18	48	87.6036	44.94	16	44	307.455	44.53	16	37	50.2478	45.34	16	31	357.103	47.37	18	38	59.399	40.89
C9JFR7	Uncharacterized protein OS=Homo sapiens GN=CYCS PE=3 SV=1 - [C9JFR7_HUMAN]	81.19	2	7	10	146	1.89068e+06	2.60581e+06	2.04931e+06	2.31373e+07	2.52052e+07	107.579	48.51	4	8	18.8244	56.44	5	9	84.43	48.51	4	7	14.7195	62.38	6	10	51.79	39.6	4	7	15.2371	79.21	8	12	162.984	56.44	5	12	26.7186	56.44	5	12	249.832	56.44	5	13	28.5065	64.36
P07951-3	Isoform 3 of Tropomyosin beta chain OS=Homo sapiens GN=TPM2 - [TPM2_HUMAN]	81.05	4	0	34	729	7.91307e+07	7.56389e+07	6.43184e+07	2.53527e+08	2.43517e+08	867.315	66.13	24	76	147.657	66.13	23	77	871.441	59.27	21	68	147.544	63.31	22	76	735.079	63.31	21	62	138.579	63.31	21	62	432.176	55.65	18	40	79.8944	64.92	22	43	416.517	54.44	18	39	70.0805	65.73
P55008	Allograft inflammatory factor 1 OS=Homo sapiens GN=AIF1 PE=1 SV=1 - [AIF1_HUMAN]	80.95	2	3	16	60	1.3614e+06	2.31606e+06	631015	1.44928e+07	1.13463e+07	62.02	17.69	2	2	4.63915	40.82	5	7	66.69	17.69	2	2	4.38419	38.1	3	3	81.56	13.61	1	1	6.39242	34.01	3	6	146.36	27.21	4	6	11.1287	37.41	5	8	70.32	17.69	2	3	6.39868	43.54
P06702	Protein S100-A9 OS=Homo sapiens GN=S100A9 PE=1 SV=1 - [S10A9_HUMAN]	80.7	1	7	9	179	1.38045e+06	1.44962e+06	1.35797e+06	9.97636e+07	1.0075e+08	102.61	42.98	3	6	18.1488	42.98	3	8	163.587	50	4	9	22.7904	50	4	11	111.98	31.58	2	3	16.4708	42.98	3	9	365.224	75.44	7	23	71.1327	78.07	8	30	486.287	75.44	7	23	67.7969	78.07
P08758	Annexin A5 OS=Homo sapiens GN=ANXA5 PE=1 SV=2 - [ANXA5_HUMAN]	80.31	6	22	30	535	5.99493e+06	5.93899e+06	4.47982e+06	2.71757e+08	2.63244e+08	775.058	54.06	15	28	85.2366	61.88	16	29	841.719	57.5	17	33	87.1041	65.31	18	34	690.485	57.5	16	28	77.7741	60.31	17	29	1202.08	75.94	23	62	140.56	78.75	26	69	1044.97	66.25	21	57	122.825	65.31
Q5VU66	Tropomyosin 3 OS=Homo sapiens GN=TPM3 PE=2 SV=1 - [Q5VU66_HUMAN]	80.24	7	0	33	612	7.91307e+07	7.56389e+07	6.43184e+07	2.44511e+08	2.39648e+08	653.772	48.39	18	53	101.084	57.66	22	59	515.717	52.82	19	53	96.7427	61.69	21	54	460.737	56.05	19	53	92.7019	56.05	20	53	307.455	41.53	15	34	49.9568	45.16	16	31	357.103	44.76	17	37	60.7433	47.58
Q15363	Transmembrane emp24 domain-containing protein 2 OS=Homo sapiens GN=TMED2 PE=1 SV=1 - [TMED2_HUMAN]	80.1	5	7	12	147	7.04209e+06	5.30471e+06	4.42455e+06	5.50563e+07	9.44319e+07	308.689	27.86	5	11	28.3782	30.85	6	15	329.67	27.86	5	11	28.3058	34.33	6	14	321.13	23.38	4	12	31.0043	23.38	4	14	105.807	17.41	3	6	10.2316	17.41	3	5	112.31	9.45	2	5	8.9961	17.41
F5H6N1	Uncharacterized protein OS=Homo sapiens GN=MAGOHB PE=4 SV=1 - [F5H6N1_HUMAN]	78.89	5	1	6	14	2.53041e+06	2.05889e+06	1.45511e+06	1.65048e+07	1.76932e+07					2.10926	23.33	2	2					0	24.44	2	2					0	30	3	3					0	31.11	2	3					0	31.11
P06576	ATP synthase subunit beta, mitochondrial OS=Homo sapiens GN=ATP5B PE=1 SV=3 - [ATPB_HUMAN]	78.45	5	27	32	966	1.33618e+07	1.21971e+07	8.78068e+06	3.35213e+08	2.89606e+08	1234.8	55.77	19	50	149.404	55.77	19	50	1312.93	51.61	18	50	165.111	51.61	18	52	1415.51	51.61	18	51	171.651	51.61	18	56	2109.64	69	23	83	262.459	69	23	88	2222.9	72.59	27	82	262.325	71.83
P14927	Cytochrome b-c1 complex subunit 7 OS=Homo sapiens GN=UQCRB PE=1 SV=2 - [QCR7_HUMAN]	78.38	4	7	11	58	1.48283e+06	615182	290182	1.09665e+07	5.27371e+07					0	10.81	1	1	30.95	19.82	2	2	4.86189	19.82	2	3					1.85938	6.31	1	1	21.35	5.41	1	2	3.63703	14.41	2	3	21.2477	19.82	3	4	3.49139	40.54
Q5VYJ4	Putative small nuclear ribonucleoprotein polypeptide E-like protein 1 OS=Homo sapiens GN=SNRPEL1 PE=5 SV=1 - [RUEL1_HUMAN]	78.26	3	2	4	12	0	757248	353131	1.44485e+07	17186659													1.60862	13.04	1	1					1.73824	13.04	1	1	41.09	11.96	1	2	3.82901	11.96	1	2	53.05	11.96	1	2	4.42322	20.65
P0C0S5	Histone H2A.Z OS=Homo sapiens GN=H2AFZ PE=1 SV=2 - [H2AZ_HUMAN]	78.13	9	3	10	161	6.38455e+07	7.3736e+07	5.19124e+07	5.61748e+08	7.34803e+08	205.16	50	5	15	36.3921	42.97	4	14	164.847	27.34	4	12	23.6232	20.31	3	13	127.518	53.91	5	13	29.1087	56.25	6	16	155.235	12.5	2	13	29.5733	25.78	4	16	169.365	12.5	2	13	28.8123	12.5
P07108-2	Isoform 2 of Acyl-CoA-binding protein OS=Homo sapiens GN=DBI - [ACBP_HUMAN]	77.88	5	2	6	19	912050	0	0	3.57567e+07	1.68928e+06					0	24.04	1	1					0	24.04	1	1					0	5.77	1	1	24.78	15.38	1	2	4.73961	25	2	3	31.91	19.23	1	1	1.64686	32.69
Q09666	Neuroblast differentiation-associated protein AHNAK OS=Homo sapiens GN=AHNAK PE=1 SV=2 - [AHNK_HUMAN]	77.81	10	168	329	2466	2.20468e+07	2.50167e+07	1.55513e+07	215446703	3.71076e+08	621.629	19.17	35	71	158.02	31.48	64	110	778.129	22	42	81	164.016	33.7	71	121	622.742	19.12	35	72	148.24	26.5	62	114	3193.86	47.59	135	265	543.448	58.59	196	375	3468.8	50.37	142	289	563.169	57.49
P27797	Calreticulin OS=Homo sapiens GN=CALR PE=1 SV=1 - [CALR_HUMAN]	77.7	2	27	38	663	2.0832e+07	2.42851e+07	2.01316e+07	3.18487e+08	336068011	505.498	47	13	40	111.629	60.43	21	61	527.147	38.61	13	35	96.7218	47.96	17	49	545.842	38.13	16	34	94.3601	46.04	19	50	845.496	45.32	19	47	126.047	62.59	22	63	921.9	45.08	17	48	141.594	53.24
E7EPW1	Uncharacterized protein OS=Homo sapiens GN=GAPDH PE=3 SV=1 - [E7EPW1_HUMAN]	77.64	2	1	12	151	3.85469e+06	4.19594e+06	3.48929e+06	1.33022e+08	1.28873e+08	262.71	57.76	6	12	35.857	52.8	5	11	240.961	62.73	7	11	25.9978	62.73	7	12	167.685	52.8	5	10	24.6547	52.8	5	9	121.349	49.07	5	12	23.4369	37.27	3	8	156.775	57.76	6	13	27.9686	65.22
O43676	NADH dehydrogenase [ubiquinone] 1 beta subcomplex subunit 3 OS=Homo sapiens GN=NDUFB3 PE=1 SV=3 - [NDUB3_HUMAN]	77.55	2	2	6	22	475979	499699	0	20568470	1.75714e+07					0	13.27	1	1					0	13.27	1	1													0	11.22	1	2					1.96122	11.22
P62258	14-3-3 protein epsilon OS=Homo sapiens GN=YWHAE PE=1 SV=1 - [1433E_HUMAN]	77.25	2	12	22	280	6.50423e+06	7.17934e+06	6.76256e+06	1.64461e+08	1.44787e+08	267.087	38.82	8	15	39.6974	39.61	8	15	243.583	32.16	7	12	32.0216	36.47	9	15	195.717	29.02	6	9	29.5523	32.94	7	11	471.575	43.53	9	20	54.2087	49.41	11	23	578.621	47.84	10	23	67.0784	56.47
P26447	Protein S100-A4 OS=Homo sapiens GN=S100A4 PE=1 SV=1 - [S10A4_HUMAN]	77.23	2	5	8	55	1.46799e+06	0	1.12722e+06	4.96246e+07	6.39973e+07					0	49.5	3	7					0	29.7	1	2					2.02809	49.5	3	5	37.1533	27.72	3	7	15.1778	38.61	6	10	22.97	36.63	4	9	18.1293	66.34
Q9H0U4	Ras-related protein Rab-1B OS=Homo sapiens GN=RAB1B PE=1 SV=1 - [RAB1B_HUMAN]	77.11	35	4	14	191	3.38146e+06	3.92231e+06	2.35533e+06	1.2316e+08	1.09294e+08	342.021	34.33	5	8	27.9187	34.33	5	10	333.832	44.28	6	11	30.3192	51.24	8	13	291.822	42.29	6	11	31.2206	42.29	6	12	535.059	51.74	8	18	45.0642	54.23	9	20	520.135	56.22	9	19	43.9052	58.71
Q07065	Cytoskeleton-associated protein 4 OS=Homo sapiens GN=CKAP4 PE=1 SV=2 - [CKAP4_HUMAN]	77.08	7	32	52	564	9.48988e+06	1.44931e+07	7.44661e+06	1.41494e+08	5.42753e+07	587.821	37.38	20	38	72.3041	38.54	21	38	631.116	34.55	19	35	65.4803	40.7	21	35	606.694	41.36	21	42	80.3835	39.53	21	42	858.246	43.36	23	48	111.893	46.68	26	51	1052.57	44.19	25	51	132.966	51.5
P62263	40S ribosomal protein S14 OS=Homo sapiens GN=RPS14 PE=1 SV=3 - [RS14_HUMAN]	76.82	2	4	8	51	711890	774106	1.14907e+07	2.27606e+07	2.75678e+07	62.815	36.42	4	6	12.7611	49.01	4	7	24.31	13.91	1	1	4.1598	22.52	2	2	58.2833	27.81	3	4	9.24145	29.14	4	5	99.21	22.52	3	5	10.3185	22.52	3	5	101.58	15.89	2	4	10.0742	15.89
P05387	60S acidic ribosomal protein P2 OS=Homo sapiens GN=RPLP2 PE=1 SV=1 - [RLA2_HUMAN]	76.52	1	5	6	169	3.31077e+06	3.54398e+06	2.77336e+06	7.06404e+07	7.07264e+07	263.915	59.13	4	10	37.6722	59.13	4	10	358.803	69.57	5	10	41.831	69.57	5	12	435.941	69.57	5	12	44.7854	69.57	5	12	400.419	53.04	4	13	43.1755	60	5	14	444.985	53.04	4	12	43.2426	53.04
P23528	Cofilin-1 OS=Homo sapiens GN=CFL1 PE=1 SV=3 - [COF1_HUMAN]	76.51	8	8	15	180	4.21092e+06	7.05349e+06	5.13296e+06	1.81163e+07	6.747e+07	439.08	45.78	6	12	45.89	59.04	9	19	418.072	50	7	13	41.3918	59.04	8	16	343.7	34.94	4	9	32.3496	47.59	5	12	225.67	26.51	3	5	15.872	39.16	4	7	298.941	34.94	4	9	28.1111	53.01
P09493-3	Isoform 3 of Tropomyosin alpha-1 chain OS=Homo sapiens GN=TPM1 - [TPM1_HUMAN]	76.41	9	2	38	829	8.47798e+07	8.04272e+07	6.89072e+07	2.44511e+08	2.39648e+08	757.042	56.34	24	80	165.622	57.39	24	81	788.746	54.93	24	76	173.527	64.08	28	91	745.491	56.34	24	75	153.955	57.39	24	78	403.798	51.76	21	51	85.5293	48.59	20	46	420.017	45.77	19	50	100.232	48.59
P24844	Myosin regulatory light polypeptide 9 OS=Homo sapiens GN=MYL9 PE=1 SV=4 - [MYL9_HUMAN]	76.16	2	2	15	293	1.59477e+07	1.94885e+07	1.38999e+07	3.53351e+08	3.72586e+08	516.995	45.35	6	18	58.4122	62.79	9	24	710.205	50.58	7	27	83.6925	54.65	8	30	644.419	45.35	7	22	71.9391	71.51	9	29	296.551	48.84	8	18	53.1027	48.84	9	29	508.952	48.84	8	23	73.0954	54.65
P02545	Prelamin-A/C OS=Homo sapiens GN=LMNA PE=1 SV=1 - [LMNA_HUMAN]	76.05	6	2	63	1023	21431590	2.24677e+07	1.9412e+07	6.02521e+07	2.86267e+08	2154.44	51.96	34	105	251.367	53.77	36	109	2248.36	54.52	36	103	258.513	54.67	36	102	2044.28	55.12	34	95	247.024	56.48	35	96	1000.3	43.98	25	44	96.6049	46.69	29	53	959.75	41.87	23	44	102.058	49.25
B4DDF9	Uncharacterized protein OS=Homo sapiens GN=ANXA4 PE=2 SV=1 - [B4DDF9_HUMAN]	75.95	1	1	23	239	3.1946e+06	6.75522e+06	1.86191e+06	9.55914e+07	8.48026e+07	190.366	26.16	5	7	18.6023	41.35	9	15	266.876	29.54	6	11	24.2302	38.82	8	15	227.213	19.41	4	7	18.9346	23.21	6	10	381.488	49.37	14	23	43.3983	56.96	16	28	384.425	49.37	13	24	45.1619	56.12
B4DW52	Uncharacterized protein OS=Homo sapiens GN=ACTB PE=2 SV=1 - [B4DW52_HUMAN]	75.5	3	1	24	2390	3.89607e+08	3.99014e+08	3.55464e+08	5.47374e+09	4.76725e+09	3519.07	61.1	15	156	468.012	67.72	16	177	3623.48	61.1	15	158	465.919	63.69	17	175	3448.64	61.1	15	168	473.726	67.72	16	185	3527.76	61.96	17	176	464.05	63.69	18	206	3793.99	53.89	16	179	469.196	64.55
P05109	Protein S100-A8 OS=Homo sapiens GN=S100A8 PE=1 SV=1 - [S10A8_HUMAN]	75.27	1	5	8	52	43960.9	1.00982e+06	1.05187e+06	3.7008e+07	4.65589e+07					0	8.6	1	2					1.62386	47.31	4	6					5.59559	20.43	2	3	63.6852	36.56	4	8	13.0974	44.09	5	11	78.4194	36.56	4	8	13.2749	44.09
P31949	Protein S100-A11 OS=Homo sapiens GN=S100A11 PE=1 SV=2 - [S10AB_HUMAN]	75.24	1	4	7	70	3.3213e+06	3.48477e+06	2.70658e+06	1.54054e+08	1.36889e+08	83.19	30.48	3	4	8.49512	30.48	3	4	55.29	15.24	2	3	5.60709	54.29	4	5	61.71	15.24	2	3	6.00494	15.24	2	3	110.6	39.05	4	7	14.3114	39.05	4	7	105.04	39.05	4	8	8.18025	39.05
P12074	Cytochrome c oxidase subunit 6A1, mitochondrial OS=Homo sapiens GN=COX6A1 PE=1 SV=4 - [CX6A1_HUMAN]	75.23	2	2	4	18	0	645457	1.31351e+06	2.54106e+07	21203069					2.45258	26.61	1	2					0	26.61	1	2					5.05994	43.12	2	4					0	22.02	1	1					0	22.02
P07737	Profilin-1 OS=Homo sapiens GN=PFN1 PE=1 SV=2 - [PROF1_HUMAN]	75	1	7	10	117	5.23263e+06	4.81802e+06	3.30792e+06	5.06598e+07	7.87263e+07	212.233	35.71	4	9	21.1609	35.71	4	8	220.189	27.14	3	6	18.8861	34.29	4	7	181.491	35.71	4	7	20.2821	40.71	5	8	94.5131	27.14	3	5	13.8477	27.14	3	8	143.01	44.29	5	8	21.3852	62.86
P04843	Dolichyl-diphosphooligosaccharide--protein glycosyltransferase subunit 1 OS=Homo sapiens GN=RPN1 PE=1 SV=1 - [RPN1_HUMAN]	74.96	5	27	37	450	5.20187e+06	6.54626e+06	4.75125e+06	58919064	6.82019e+07	633.483	36.41	17	34	93.3593	38.22	18	38	709.044	39.87	19	39	115.355	40.03	19	41	673.163	34.1	17	36	95.0548	37.4	18	35	610.203	34.1	17	32	89.8603	49.42	22	40	577.162	37.56	18	32	91.6959	41.19
P04406	Glyceraldehyde-3-phosphate dehydrogenase OS=Homo sapiens GN=GAPDH PE=1 SV=3 - [G3P_HUMAN]	74.93	5	7	19	366	4.03994e+06	4.19594e+06	6.68208e+06	1.3387e+08	1.58993e+08	810.945	54.63	11	27	94.5443	52.24	10	32	857.771	57.01	12	26	87.8442	67.16	13	30	700.964	51.04	10	26	84.709	56.42	12	33	292.054	28.96	6	15	38.0296	26.57	5	14	479.29	44.48	9	20	55.6061	49.55
P69905	Hemoglobin subunit alpha OS=Homo sapiens GN=HBA1 PE=1 SV=2 - [HBA_HUMAN]	74.65	2	9	11	860	7.33519e+07	7.493e+07	4.79308e+07	7.90419e+08	8.80595e+08	1245.92	69.01	9	57	193.305	64.08	8	64	1345.01	69.01	9	63	197.739	66.9	9	67	1518.33	69.01	9	64	220.525	66.9	9	69	854.286	69.01	9	38	121.067	64.08	8	46	865.907	69.01	9	44	130.115	64.08
P61604	10 kDa heat shock protein, mitochondrial OS=Homo sapiens GN=HSPE1 PE=1 SV=2 - [CH10_HUMAN]	74.51	3	9	9	161	7.92844e+06	6.44758e+06	5.16466e+06	6.8311e+07	6.26457e+07	236.49	23.53	2	6	18.6828	23.53	2	6	296.457	35.29	3	10	28.6214	42.16	4	11	275.045	42.16	4	11	24.82	42.16	4	12	181.485	66.67	7	12	15.6188	51.96	5	12	181.161	67.65	7	14	21.1894	67.65
P84077	ADP-ribosylation factor 1 OS=Homo sapiens GN=ARF1 PE=1 SV=2 - [ARF1_HUMAN]	74.03	17	4	13	219	3.48265e+06	3.95224e+06	2.6405e+06	8.47246e+07	9.96155e+07	270.824	49.17	7	16	53.0307	49.17	7	18	393.452	45.3	6	13	45.0801	50.83	7	14	394.944	46.41	7	18	51.8638	46.41	7	17	470.035	60.77	9	20	51.3442	58.56	9	21	417.148	55.8	9	17	40.2352	57.46
C9J1Z8	Uncharacterized protein OS=Homo sapiens GN=ARF5 PE=3 SV=1 - [C9J1Z8_HUMAN]	74	13	3	12	172	3.48265e+06	3.95224e+06	2.7556e+06	6.65981e+07	5.26429e+07	193.539	40	4	11	43.4918	46	5	16	299.7	46.67	5	11	37.7306	52.67	6	13	312.456	41.33	5	14	42.0105	47.33	6	14	240.98	48.67	6	13	33.3381	70.67	10	20	177.345	38.67	5	10	22.0554	64.67
E9PL01	Uncharacterized protein OS=Homo sapiens GN=SPCS2 PE=4 SV=1 - [E9PL01_HUMAN]	73.89	4	10	15	201	5.35778e+06	4.49062e+06	3.4398e+06	6.69447e+07	7.07441e+07	175.644	40.13	6	10	30.2902	49.68	7	14	221.325	49.04	7	14	36.1727	54.78	9	17	236.849	44.59	6	12	39.2969	57.32	10	18	335.197	49.68	9	18	49.4071	49.68	9	19	240.148	49.68	9	18	41.9687	54.14
F5H2A7	Uncharacterized protein OS=Homo sapiens GN=VBP1 PE=4 SV=1 - [F5H2A7_HUMAN]	73.44	2	1	11	19	1.02035e+06	785297	1.99948e+06	12789200	6.31271e+06					2.05459	23.96	2	2					1.62399	17.71	2	2					0	28.13	3	3					0	3.65	1	1					0	7.29
F5H0H5	Uncharacterized protein OS=Homo sapiens GN=CADM1 PE=4 SV=1 - [F5H0H5_HUMAN]	73.42	2	1	5	9	0	1.12014e+06	575977	0	1.04778e+07													0	43.04	2	2					0	7.59	1	1					0	24.05	1	1					0	26.58
B4DUI8	Uncharacterized protein OS=Homo sapiens GN=ACTA2 PE=2 SV=1 - [B4DUI8_HUMAN]	72.89	1	4	25	2524	5.19704e+08	5.12334e+08	4.48236e+08	5.36904e+09	4.7456e+09	3695.13	54.22	15	195	532.587	54.22	15	216	3678.63	54.22	15	182	539.432	64.46	16	201	3360.6	56.33	16	176	522.559	57.23	17	202	3451.68	53.92	17	168	446.228	55.72	19	191	3395.25	51.81	16	167	438.108	56.63
P31946	14-3-3 protein beta/alpha OS=Homo sapiens GN=YWHAB PE=1 SV=3 - [1433B_HUMAN]	72.76	6	5	20	378	7.74752e+06	1.69024e+07	7.27261e+06	1.78015e+08	1.64389e+08	367.235	41.87	9	17	40.1848	41.87	9	17	403.189	38.62	8	20	54.8407	54.07	13	27	322.96	41.87	9	18	45.8262	41.87	9	19	651.742	54.07	13	33	83.6699	65.85	17	41	688.743	51.63	12	35	91.5759	56.5
P62937	Peptidyl-prolyl cis-trans isomerase A OS=Homo sapiens GN=PPIA PE=1 SV=2 - [PPIA_HUMAN]	72.73	9	5	11	135	3.13966e+06	3.0701e+06	2696024	4.74714e+07	4.43236e+07	134.63	32.73	5	8	11.3075	24.24	5	8	139.81	32.73	5	8	15.7218	41.82	8	12	107.301	32.73	5	7	14.7238	29.09	5	8	44.59	16.36	3	5	10.9408	40.61	5	8	37.62	12.12	2	4	5.97035	16.36
Q5T123	SH3 domain binding glutamic acid-rich protein like 3 OS=Homo sapiens GN=SH3BGRL3 PE=2 SV=1 - [Q5T123_HUMAN]	72.73	2	2	6	22	96400	4.08823e+06	314626	3.45971e+07	196441					0	9.09	1	1					0	22.73	1	1					2.62766	17.05	1	1	26.39	37.5	3	4	8.96398	38.64	3	4	38.56	26.14	2	2	3.13381	26.14
P20700	Lamin-B1 OS=Homo sapiens GN=LMNB1 PE=1 SV=2 - [LMNB1_HUMAN]	72.7	2	23	50	432	1.21545e+07	1.15772e+07	9.30692e+06	3.46557e+07	2.02784e+07	952.549	45.9	23	49	131.411	44.54	21	53	902.201	42.83	21	46	121.742	49.83	26	54	951.51	40.44	21	49	132.313	45.9	24	51	216.414	12.63	7	10	29.3329	30.89	12	17	204.268	13.31	7	12	31.1461	24.06
O43169	Cytochrome b5 type B OS=Homo sapiens GN=CYB5B PE=1 SV=2 - [CYB5B_HUMAN]	72.6	2	5	6	71	1.73372e+06	2.01774e+06	1.90294e+06	2.80972e+07	1.56973e+07	192.047	41.78	4	8	21.6969	37.67	3	6	225.437	41.78	4	8	20.2263	37.67	3	6	172.263	37.67	3	6	16.0964	37.67	3	6	178.05	42.47	3	6	14.9623	42.47	3	6	79.6333	29.45	2	3	8.43199	29.45
Q99623	Prohibitin-2 OS=Homo sapiens GN=PHB2 PE=1 SV=2 - [PHB2_HUMAN]	72.58	8	6	19	140	4.28127e+06	5.42038e+06	1.5931e+06	7.43825e+07	8.91976e+07	250.951	28.76	7	10	27.7297	41.14	9	14	236.264	28.76	7	10	29.3722	31.77	7	12	247.372	21.74	5	8	25.4658	25.42	6	9	164.666	25.08	7	9	21.888	22.74	6	10	281.226	19.73	5	9	28.617	23.41
P27482	Calmodulin-like protein 3 OS=Homo sapiens GN=CALML3 PE=1 SV=2 - [CALL3_HUMAN]	72.48	3	1	13	95	3.11113e+06	7.63445e+06	3.00018e+06	1.23392e+08	1.14913e+08	39.48	5.37	1	2	3.31309	17.45	3	5	51.67	23.49	3	5	3.46344	10.07	2	5					5.17416	40.27	5	10	35.57	10.07	2	9	5.38011	33.56	5	13	57.1621	10.07	2	8	5.83502	36.91
P67936-2	Isoform 2 of Tropomyosin alpha-4 chain OS=Homo sapiens GN=TPM4 - [TPM4_HUMAN]	72.18	6	3	37	820	8.47798e+07	8.04272e+07	6.89072e+07	2.32344e+08	2.24338e+08	518.489	54.23	25	82	149.975	54.23	25	84	528.176	49.3	22	72	159.503	53.17	24	82	457.135	56.34	24	72	136.27	56.34	23	71	236.501	42.96	18	42	74.3038	48.59	21	44	271.919	37.68	17	44	86.3081	48.24
E9PPH5	Uncharacterized protein OS=Homo sapiens GN=ANP32E PE=4 SV=1 - [E9PPH5_HUMAN]	71.93	8	1	5	12	352471	159156	0	1.39925e+07	1.47803e+07					0	16.67	2	2					0	16.67	1	1													4.27461	38.6	2	3	0	15.79	2	2	4.97995	38.6
P21912	Succinate dehydrogenase [ubiquinone] iron-sulfur subunit, mitochondrial OS=Homo sapiens GN=SDHB PE=1 SV=3 - [DHSB_HUMAN]	71.79	1	9	21	121	2.05694e+06	1.40669e+06	1.04105e+06	3.86484e+07	3.79784e+07	41.64	10.36	3	4	8.2321	17.5	4	6	51.13	12.5	3	5	12.4388	17.14	4	7	57.46	10	2	4	13.2701	16.43	4	7	113.73	18.21	5	9	21.1807	42.14	10	18	109.993	23.21	6	8	17.8096	43.57
P68133	Actin, alpha skeletal muscle OS=Homo sapiens GN=ACTA1 PE=1 SV=1 - [ACTS_HUMAN]	71.62	9	1	27	2597	5.57177e+08	5.19246e+08	4.72775e+08	5.36904e+09	4.7456e+09	3243.3	50.4	16	199	481.538	55.97	17	228	3179.86	50.4	16	185	466.344	64.99	18	200	3059.97	55.97	17	193	494.665	56.76	18	216	2695.28	51.19	18	178	411.646	58.36	21	200	2784.06	51.19	18	179	384.811	59.42
P02647	Apolipoprotein A-I OS=Homo sapiens GN=APOA1 PE=1 SV=1 - [APOA1_HUMAN]	71.54	5	15	22	202	1.09834e+06	7.71708e+06	6.36015e+06	7.8948e+07	7.76087e+07	134.464	18.35	4	7	16.1163	20.6	5	8	148.237	14.23	3	6	15.1094	18.35	4	8	154.969	20.6	5	8	15.1157	22.47	5	8	375.444	48.31	12	24	51.7922	56.93	14	29	372.463	52.06	14	25	45.9549	49.44
P21291	Cysteine and glycine-rich protein 1 OS=Homo sapiens GN=CSRP1 PE=1 SV=3 - [CSRP1_HUMAN]	71.5	5	4	14	74	6.63453e+06	6.23911e+06	7.08848e+06	2.98763e+07	2.82377e+07	46.27	24.35	3	4	10.6229	37.82	5	7	50.16	7.77	1	2	5.71968	21.24	3	6	21.99	7.77	1	1	2.45674	40.93	5	5	129.77	25.39	4	6	9.09959	25.39	4	7	109.82	20.73	3	4	6.62266	30.57
P08133	Annexin A6 OS=Homo sapiens GN=ANXA6 PE=1 SV=3 - [ANXA6_HUMAN]	71.47	10	1	51	979	2.24233e+07	2.53142e+07	2.05028e+07	3.59688e+08	3.62184e+08	1183.43	50.37	30	72	179.154	54.98	33	81	1461.84	50.37	28	66	177.187	55.42	32	77	1311.45	48.59	26	65	180.881	54.09	30	78	1433.48	54.53	34	83	191.889	55.27	36	94	1549.98	56.46	35	85	216.43	62.7
P05783	Keratin, type I cytoskeletal 18 OS=Homo sapiens GN=KRT18 PE=1 SV=2 - [K1C18_HUMAN]	71.4	17	22	30	274	4.68302e+06	6.95707e+06	2.32631e+07	4.98062e+07	6.85726e+07	338.376	25.35	8	17	32.4307	25.35	8	16	440.615	29.53	11	19	35.7092	28.37	10	18	266.876	26.28	11	18	33.4001	32.56	12	19	392.193	33.26	13	24	44.5192	40.93	15	27	552.634	23.26	10	22	50.691	30
P67936	Tropomyosin alpha-4 chain OS=Homo sapiens GN=TPM4 PE=1 SV=3 - [TPM4_HUMAN]	71.37	6	4	32	676	7.91307e+07	7.56389e+07	6.43184e+07	231548085	2.22798e+08	608.361	57.26	22	61	116.575	57.26	23	65	690.102	51.61	21	62	133.802	55.65	22	63	568.904	54.44	21	58	119.173	54.44	21	56	515.58	43.55	18	39	80.0007	50	21	41	494.705	46.37	19	41	81.5255	49.6
A6NN80	Annexin A6, isoform CRA_c OS=Homo sapiens GN=ANXA6 PE=3 SV=3 - [A6NN80_HUMAN]	71.21	8	1	52	965	2.24233e+07	2.53142e+07	2.05028e+07	3.59688e+08	3.62184e+08	1117.75	49.93	30	72	175.006	54.57	33	80	1359.43	49.93	28	66	172.359	55.02	32	77	1178.15	48.13	26	63	172.811	54.57	31	77	1354.1	54.12	34	81	182.452	54.87	36	92	1487.5	56.07	35	84	210.665	62.37
B1ALC0	Actin-related protein 2/3 complex subunit 5 OS=Homo sapiens GN=ARPC5 PE=3 SV=1 - [B1ALC0_HUMAN]	71.11	3	3	8	27	468371	615808	392963	13326575	9.73717e+06	25.77	9.63	1	1	2.03587	9.63	1	3					1.66514	35.56	2	2					1.73253	16.3	2	2					0	20	3	4	54.47	14.07	2	3	2.16325	20.74
Q86UY0	TXNDC5 protein OS=Homo sapiens GN=TXNDC5 PE=2 SV=1 - [Q86UY0_HUMAN]	71.11	4	17	23	335	9.21125e+06	8.21244e+06	4.86352e+06	1.14701e+08	1.15538e+08	255.019	36.94	11	23	43.3588	46.94	13	27	295.625	41.94	13	25	48.1462	45	14	26	266.932	31.11	10	22	42.5711	46.94	14	28	317.784	35.56	12	28	56.4561	43.61	15	35	321.504	38.06	13	29	56.9748	45.28
P02042	Hemoglobin subunit delta OS=Homo sapiens GN=HBD PE=1 SV=2 - [HBD_HUMAN]	70.75	6	2	10	495	3.82728e+07	3.90197e+07	3.22093e+07	4.74299e+08	4.99172e+08	744.183	55.1	8	37	75.344	49.66	7	32	662.423	46.94	7	30	64.5593	41.5	6	28	638.63	46.94	7	29	60.4158	55.78	7	27	816.739	55.1	8	36	75.8823	49.66	7	36	905.646	46.94	7	33	82.1668	41.5
P51572	B-cell receptor-associated protein 31 OS=Homo sapiens GN=BCAP31 PE=1 SV=3 - [BAP31_HUMAN]	70.73	10	14	20	222	4.29774e+06	4.72435e+06	3.25e+06	4.82435e+07	4.63743e+07	209.48	29.67	7	11	23.6749	48.78	10	16	245.681	26.02	6	12	28.9251	32.52	7	16	219.391	39.02	9	18	33.1081	37.4	10	20	163.403	29.67	7	14	35.5303	30.08	8	20	157.69	21.54	5	14	25.6036	25.2
Q9Y5U8	Brain protein 44-like protein OS=Homo sapiens GN=BRP44L PE=1 SV=1 - [BR44L_HUMAN]	70.64	1	2	5	8	283936	0	0	0	1.57849e+08					0	20.18	1	1																					0	20.18	1	1	0	7.34	1	1	0	22.94
P06899	Histone H2B type 1-J OS=Homo sapiens GN=HIST1H2BJ PE=1 SV=3 - [H2B1J_HUMAN]	70.63	8	1	13	500	8.98733e+07	9.04499e+07	7.64961e+07	480539766	4.38588e+08	806.431	50.79	7	37	80.1521	58.73	9	43	869.001	57.94	8	42	83.4588	57.94	8	51	820.634	45.24	6	40	71.1885	52.38	7	43	657.826	45.24	6	40	74.7688	50.79	7	43	870.891	50.79	8	46	83.4135	50.79
O43707	Alpha-actinin-4 OS=Homo sapiens GN=ACTN4 PE=1 SV=2 - [ACTN4_HUMAN]	70.58	5	39	67	1548	1.3784e+07	1.24028e+07	1.07387e+07	3.0347e+08	2.66999e+08	1741.12	53.02	40	102	257.124	55.43	43	115	1803.81	53.35	40	97	257.119	59.82	46	113	1564.76	49.95	37	91	231.845	49.73	38	98	2525.37	61.25	52	144	368.589	61.25	54	164	2916.08	59.93	49	141	391.244	64.43
A8MW06	Thymosin beta-4-like protein 3 OS=Homo sapiens GN=TMSL3 PE=2 SV=1 - [TMSL3_HUMAN]	70.45	4	1	3	5	0	0	0	0	0
Q9NRV9	Heme-binding protein 1 OS=Homo sapiens GN=HEBP1 PE=1 SV=1 - [HEBP1_HUMAN]	70.37	2	3	9	16	0	0	1.26134e+06	0	1.38244e+07					0	11.11	1	1					0	10.05	1	1					0	12.7	1	1													0	22.75
P06703	Protein S100-A6 OS=Homo sapiens GN=S100A6 PE=1 SV=1 - [S10A6_HUMAN]	70	1	6	8	88	4.19873e+06	4.02946e+06	7.54106e+06	1.31638e+08	1.07517e+08	101.725	45.56	4	8	14.6605	37.78	3	6	74.4314	55.56	5	6	12.3174	45.56	4	5	78.74	54.44	4	5	9.60121	44.44	3	4	68.2135	36.67	5	9	8.2975	38.89	5	8	56.7918	36.67	5	8	4.18773	38.89
P21796	Voltage-dependent anion-selective channel protein 1 OS=Homo sapiens GN=VDAC1 PE=1 SV=2 - [VDAC1_HUMAN]	69.96	3	13	18	367	8.071e+06	7.48008e+06	5.25521e+06	5.52151e+07	6.4382e+07	1124.98	61.48	11	33	113.277	62.9	13	36	859.124	53.71	10	30	99.2347	53.71	10	31	1034.31	61.48	11	31	105.38	64.31	12	37	685.055	40.64	8	21	53.2237	43.46	9	22	495.738	38.87	8	18	46.4361	41.7
Q3MNF0	Myosin, heavy chain 11, smooth muscle OS=Homo sapiens GN=MYH11 PE=2 SV=1 - [Q3MNF0_HUMAN]	69.87	15	1	175	4094	6.37824e+07	5.91563e+07	4.91346e+07	3.25806e+08	3.27805e+08	9400.25	57.28	115	406	1143.74	60.36	125	437	9574	55.53	114	411	1201.38	57.07	124	450	9513.46	54.86	111	395	1162.32	54.34	109	417	6407.53	48.38	95	244	747.549	52.39	106	284	6127.38	48.43	90	249	749.541	51.26
F5GWR2	Uncharacterized protein OS=Homo sapiens GN=HSPD1 PE=3 SV=1 - [F5GWR2_HUMAN]	69.8	1	1	13	273	4.1081e+06	4.94828e+06	3.05231e+06	1.39228e+08	7.485e+07	618.074	38.37	7	20	65.6248	50.61	8	21	702.534	52.24	8	18	69.0082	52.24	8	19	506.646	40	7	16	51.1876	35.51	6	16	500.879	44.49	8	16	52.8352	40.82	8	19	662.091	38.37	9	21	59.8661	42.86
Q16777	Histone H2A type 2-C OS=Homo sapiens GN=HIST2H2AC PE=1 SV=4 - [H2A2C_HUMAN]	69.77	4	3	8	325	1.7646e+08	1.31694e+08	7.74579e+07	5.76381e+08	5.24398e+08	519.192	60.47	6	29	91.7469	60.47	6	32	549.003	63.57	7	29	88.3294	63.57	7	32	480.83	60.47	6	28	81.8086	60.47	6	30	210.903	32.56	4	18	45.3613	32.56	4	19	233.107	32.56	4	17	41.3787	44.19
Q3MNF1	Smooth muscle myosin heavy chain isoform SM1 OS=Homo sapiens GN=MYH11 PE=2 SV=1 - [Q3MNF1_HUMAN]	69.68	15	0	177	4088	6.37824e+07	5.91563e+07	4.91346e+07	3.25806e+08	3.27805e+08	9457.32	57	115	404	1145.06	60.03	125	434	9679.78	55.28	114	407	1207.82	56.8	124	445	9648.88	54.72	112	394	1170.3	54.22	110	416	6411.73	48.11	96	246	752.33	51.59	106	284	6127.38	47.7	90	249	751.757	51.49
P04899	Guanine nucleotide-binding protein G(i) subunit alpha-2 OS=Homo sapiens GN=GNAI2 PE=1 SV=3 - [GNAI2_HUMAN]	69.58	16	6	24	247	5.83002e+06	5.87907e+06	4.10662e+06	5.0673e+08	9.05331e+07	344.485	34.65	11	21	49.1554	46.76	14	26	409.755	31.55	9	20	56.5643	29.3	8	20	370.989	29.3	8	17	52.9692	36.06	9	20	435.919	30.99	9	20	49.3465	38.31	12	25	436.356	34.37	11	23	54.0168	33.24
P35749	Myosin-11 OS=Homo sapiens GN=MYH11 PE=1 SV=3 - [MYH11_HUMAN]	69.57	15	1	177	4108	6.37824e+07	5.91563e+07	4.91346e+07	3.25806e+08	3.27805e+08	9421.5	56.85	115	406	1148.25	59.89	125	437	9700.66	55.98	115	409	1212.46	57.51	125	447	9641.54	54.56	112	395	1171.57	54.06	110	418	6412.25	47.92	96	247	753.954	51.42	106	285	6122.6	47.52	90	250	753.806	51.32
P26038	Moesin OS=Homo sapiens GN=MSN PE=1 SV=3 - [MOES_HUMAN]	69.5	2	19	50	406	8.33801e+06	4.62417e+06	2.73644e+06	8.44799e+07	6.64462e+07	319.434	19.58	12	23	52.5559	28.08	19	38	444.854	34.49	18	33	69.7731	41.59	23	39	415.586	26	15	23	54.0333	31.89	18	29	262.198	25.82	16	32	54.4467	39.51	25	47	317.746	27.38	16	33	54.2544	36.22
P31942-2	Isoform 2 of Heterogeneous nuclear ribonucleoprotein H3 OS=Homo sapiens GN=HNRNPH3 - [HNRH3_HUMAN]	69.49	7	5	14	39	2.05404e+06	0	7.7846e+06	5.46173e+07	1.4524e+07					0	32.93	5	6	22.19	9.06	2	3	2.43499	16.01	3	6					5.77964	26.59	5	8					0	15.41	2	3					0	9.67
B4DT77	Uncharacterized protein OS=Homo sapiens GN=ANXA7 PE=2 SV=1 - [B4DT77_HUMAN]	69.35	4	8	25	146	1.78086e+06	994175	2.40145e+06	7.42307e+07	3.62495e+07	69.73	9.52	2	6	15.5718	11.9	3	7	62.9033	9.52	2	3	9.33336	9.52	2	3	116.217	12.5	3	6	15.2144	27.08	8	11	527.525	27.98	8	17	52.3217	36.31	11	22	531.935	28.57	9	19	54.9379	36.9
P23396	40S ribosomal protein S3 OS=Homo sapiens GN=RPS3 PE=1 SV=2 - [RS3_HUMAN]	69.14	10	13	16	257	4.72809e+06	5.16554e+06	4.56527e+06	5.50433e+07	50809027	299.646	44.86	8	15	44.7292	49.38	9	18	378.751	47.74	9	20	55.7683	47.74	9	21	277.46	44.86	8	19	58.2232	44.86	8	21	204.618	43.62	10	20	45.9801	43.62	10	22	151.837	52.67	12	26	47.5249	52.67
O75947	ATP synthase subunit d, mitochondrial OS=Homo sapiens GN=ATP5H PE=1 SV=3 - [ATP5H_HUMAN]	68.94	3	9	11	105	2.57691e+06	1.12207e+06	1.08401e+06	9.06716e+07	8.72322e+07	42.34	8.7	1	1	4.24209	18.63	2	4	43.2833	39.13	4	5	8.8586	47.83	5	7	76.36	34.78	5	9	13.9778	38.51	6	10					0	9.32	2	3	0	9.32	2	2	0	9.32
P07910-2	Isoform C1 of Heterogeneous nuclear ribonucleoproteins C1/C2 OS=Homo sapiens GN=HNRNPC - [HNRPC_HUMAN]	68.94	8	15	26	159	3.11941e+06	2.14107e+06	1.53154e+06	8.07058e+07	2.96681e+07	411.734	17.41	5	10	32.1983	24.23	8	13	337.884	25.26	8	13	36.7168	25.26	8	14	290.095	20.82	6	10	26.3713	20.82	6	10	231.469	29.35	9	15	29.8503	37.88	9	15	181.349	19.45	5	9	19.209	21.84
P25398	40S ribosomal protein S12 OS=Homo sapiens GN=RPS12 PE=1 SV=3 - [RS12_HUMAN]	68.94	1	2	9	32	1.14537e+06	1.60639e+06	2.36322e+06	1.27758e+08	1.08973e+08					1.76546	20.45	2	3					3.38362	20.45	2	3					1.62755	12.12	2	2	0	7.58	1	1	0	34.09	3	3					3.54378	31.82
C9JXM4	Uncharacterized protein OS=Homo sapiens GN=NDUFB2 PE=4 SV=1 - [C9JXM4_HUMAN]	68.82	5	1	5	9	0	0	0	0	5302885																													0	13.98	1	1					0	16.13
P12814-2	Isoform 2 of Alpha-actinin-1 OS=Homo sapiens GN=ACTN1 - [ACTN1_HUMAN]	68.77	8	35	64	1324	1.54432e+07	1.54283e+07	1.17631e+07	3.0347e+08	2.66999e+08	1737.28	48.93	39	92	254.036	51.3	40	100	2147.65	46.79	37	97	274.312	50.06	39	114	1913.71	46.45	36	82	232.675	50.17	39	97	2758.83	54	46	123	340.584	58.96	49	141	3063.16	54.45	45	129	363.956	57.38
Q5VXI8	Lipase, gastric OS=Homo sapiens GN=LIPF PE=2 SV=1 - [Q5VXI8_HUMAN]	68.77	3	15	16	845	2.78936e+07	2.44477e+07	2.19154e+07	1.78329e+09	1.71797e+09	683.957	34.25	9	33	101.643	35.89	10	37	704.427	33.7	9	33	106.56	35.89	10	42	785.322	32.05	8	34	111.307	35.89	10	46	1789.19	41.92	12	89	262.629	54.79	14	102	2134.67	41.92	12	89	276.342	47.4
Q99653	Calcium-binding protein p22 OS=Homo sapiens GN=CHP PE=1 SV=3 - [CHP1_HUMAN]	68.72	2	3	11	23	610188	0	0	7.1386e+06	2.7512e+07					3.47894	22.05	2	3					0	21.03	3	3					0	7.18	1	1					0	7.69	3	3					1.68218	7.69
E9PN51	Uncharacterized protein OS=Homo sapiens GN=NDUFS8 PE=4 SV=1 - [E9PN51_HUMAN]	68.18	5	3	8	53	661064	710520	489418	1.6552e+07	1.91054e+07	34.46	19.09	2	2	4.91626	19.09	2	2	46.4489	19.09	2	3	7.53737	19.09	2	3	48.13	10.91	1	2	7.47084	19.09	2	4	91.7123	25.45	3	5	11.2622	26.36	3	5	93.6834	29.09	3	5	11.3076	51.82
P56556	NADH dehydrogenase [ubiquinone] 1 alpha subcomplex subunit 6 OS=Homo sapiens GN=NDUFA6 PE=1 SV=3 - [NDUA6_HUMAN]	68.18	1	3	8	25	0	328645	0	0	0					0	11.69	1	1					0	9.74	1	1													0	9.74	1	1
P22392-2	Isoform 3 of Nucleoside diphosphate kinase B OS=Homo sapiens GN=NME2 - [NDKB_HUMAN]	68.16	6	3	13	95	779204	0	781294	1.76168e+07	2.60854e+07	48.61	12.73	1	2	7.15141	12.73	1	2	59.24	12.73	1	2	6.46479	12.73	1	2	74.05	12.73	1	2	6.6934	12.73	1	2	22.33	18.73	3	5	8.43062	25.84	4	6	48.5178	28.84	5	7	11.6912	37.08
A0ZSE6	Cell cycle control protein 50C OS=Homo sapiens GN=TMEM30C PE=2 SV=2 - [CC50C_HUMAN]	68.14	1	1	4	12	0	0	0	9462981	9.81243e+06													0	27.43	1	1									31.09	7.08	1	2	3.5842	7.08	1	2					1.9466	7.08
F8W7K3	Uncharacterized protein OS=Homo sapiens GN=SPTAN1 PE=4 SV=1 - [F8W7K3_HUMAN]	68.11	3	1	160	1202	4.13763e+06	2.75964e+07	3.80858e+06	2.04003e+08	1.21156e+08	789.02	20.11	39	60	153.191	30.3	55	81	772.788	16.35	30	55	155.228	25.16	44	79	912.155	18.27	33	58	156.794	24.35	42	74	2763.1	34.26	66	125	331.446	43.31	88	159	2298.49	31	64	131	296.318	32.79
P07237	Protein disulfide-isomerase OS=Homo sapiens GN=P4HB PE=1 SV=3 - [PDIA1_HUMAN]	68.11	4	30	38	701	6.17175e+06	6.97739e+06	5.18233e+06	1.47827e+08	1.40091e+08	420.797	37.8	14	29	83.5438	41.54	16	38	510.998	38.39	15	35	101.672	46.06	20	50	392.528	38.39	15	30	82.7055	43.31	18	36	724.075	47.83	23	56	116.126	49.41	24	61	776.974	47.83	22	52	123.647	47.83
P09525	Annexin A4 OS=Homo sapiens GN=ANXA4 PE=1 SV=4 - [ANXA4_HUMAN]	68.03	2	2	27	320	3.42278e+06	6.75522e+06	1.86191e+06	9.55914e+07	8.48026e+07	296.76	22.26	6	10	25.5231	37.62	11	19	237.977	20.06	6	11	24.2302	31.03	9	16	352.685	19.44	5	9	26.612	25.08	8	13	507.296	43.89	16	29	56.6734	50.47	19	35	592.56	48.59	16	32	64.267	54.55
P35579	Myosin-9 OS=Homo sapiens GN=MYH9 PE=1 SV=4 - [MYH9_HUMAN]	68.01	5	89	158	2452	3.85754e+07	3.73855e+07	3.0801e+07	3.25521e+08	2.32232e+08	4963.65	46.12	80	209	573.652	52.09	96	244	4925.38	47.4	87	206	554.294	50.61	96	230	4502.79	43.32	77	191	543.987	48.27	84	214	4408.96	43.52	78	174	476.596	45.36	83	197	4504.38	43.62	74	178	507.738	50.41
P52272-2	Isoform 2 of Heterogeneous nuclear ribonucleoprotein M OS=Homo sapiens GN=HNRNPM - [HNRPM_HUMAN]	67.87	4	17	58	172	1.34664e+07	2.46506e+07	1.12187e+07	8.96964e+07	3.67686e+07	102.16	12.45	7	8	13.3602	19.68	11	13	146.21	16.79	7	9	10.8505	31.26	15	21	74.39	14.47	7	8	8.66261	30.68	18	21	34.67	11.29	6	7	6.84728	25.9	14	22	42.1047	4.05	3	4	8.33577	23.73
B5MD17	Uncharacterized protein OS=Homo sapiens GN=CBX1 PE=4 SV=1 - [B5MD17_HUMAN]	67.86	4	2	8	24	3.46229e+06	3.82178e+06	550915	7.58366e+06	2.19879e+07	133.66	9.52	1	2	8.18307	9.52	1	2	147.65	9.52	1	2	8.52276	39.88	3	4	55.55	9.52	1	2	9.80576	20.24	2	4					0	24.4	1	1					1.89638	23.21
E9PD95	Uncharacterized protein OS=Homo sapiens GN=MCFD2 PE=4 SV=2 - [E9PD95_HUMAN]	67.72	3	2	5	8	0	0	709290	0	0																					0	29.92	2	2					0	22.05	1	1
Q01995	Transgelin OS=Homo sapiens GN=TAGLN PE=1 SV=4 - [TAGL_HUMAN]	67.66	6	13	17	391	9.84921e+06	1.41242e+07	1.05151e+07	2.36848e+08	1.99403e+08	536.743	49.25	10	31	71.1539	54.73	12	33	391.894	53.73	11	26	50.98	53.73	11	27	501.58	53.73	11	28	62.244	53.73	11	30	551.691	59.2	13	34	66.6365	55.72	12	33	555.996	55.72	12	30	64.9618	55.72
P41227	N-alpha-acetyltransferase 10, NatA catalytic subunit OS=Homo sapiens GN=NAA10 PE=1 SV=1 - [NAA10_HUMAN]	67.66	2	1	12	22	0	2.34543e+06	3.64752e+06	1.49113e+07	2.52792e+07					0	9.79	2	3					0	14.89	2	2					0	13.19	2	2	21.62	5.11	1	1	1.9389	28.09	5	5					1.77332	28.51
Q9Y5M8	Signal recognition particle receptor subunit beta OS=Homo sapiens GN=SRPRB PE=1 SV=3 - [SRPRB_HUMAN]	67.53	2	10	15	110	999081	1.4104e+06	942502	1.64217e+07	1.6627e+07	171.4	16.61	3	6	18.8999	16.61	3	6	128.29	12.55	3	5	13.8923	12.55	3	5	150.8	15.13	4	8	18.1735	17.71	5	9	163.826	20.3	5	8	17.1122	22.88	4	7	128.56	25.46	6	13	24.7285	25.46
P46783	40S ribosomal protein S10 OS=Homo sapiens GN=RPS10 PE=1 SV=1 - [RS10_HUMAN]	67.27	3	9	16	115	1.05005e+07	764041	919542	3.31124e+07	3.171e+07	76.7524	11.52	3	4	4.82327	10.91	2	3	71.2309	27.27	4	5	6.85176	36.97	6	8	58.5724	13.94	2	3	5.73094	37.58	5	7	22.99	23.64	4	7	5.79031	49.09	9	15	25.09	32.73	6	9	5.4486	42.42
F8W7V3	Uncharacterized protein OS=Homo sapiens GN=ATP5J2 PE=4 SV=1 - [F8W7V3_HUMAN]	67.27	7	2	3	25	0	0	5.5855e+06	7.85248e+07	3.03966e+07																	24.22	47.27	2	2	1.81534	23.64	1	2	144.012	67.27	3	5	11.6666	43.64	2	4	141.188	43.64	2	5	13.0937	43.64
Q13813	Spectrin alpha chain, brain OS=Homo sapiens GN=SPTAN1 PE=1 SV=3 - [SPTA2_HUMAN]	67.23	5	3	162	1226	4.13763e+06	2.75964e+07	3.80858e+06	2.04003e+08	1.21156e+08	789.02	19.94	39	60	153.191	30.06	55	81	772.788	16.91	32	57	155.228	24.31	44	79	914.085	18.49	34	60	156.794	23.5	42	75	2774.89	35.28	69	129	333.259	43.24	89	160	2300.79	31.11	65	132	296.318	33.5
P00558	Phosphoglycerate kinase 1 OS=Homo sapiens GN=PGK1 PE=1 SV=3 - [PGK1_HUMAN]	67.15	6	20	25	393	3.05426e+06	3.52774e+06	2.9217e+06	5.85986e+07	6.19129e+07	201.435	24.22	8	18	45.3613	25.42	8	19	250.086	30.46	11	21	50.3477	30.46	12	24	193.661	35.73	12	23	62.8319	35.73	13	29	644.812	35.49	13	32	83.99	38.37	14	35	501.917	43.41	16	35	83.2376	43.41
P48735	Isocitrate dehydrogenase [NADP], mitochondrial OS=Homo sapiens GN=IDH2 PE=1 SV=2 - [IDHP_HUMAN]	67.04	3	19	30	497	3.18322e+06	3.32526e+06	2.79871e+06	1.21794e+08	1.47401e+08	309.992	22.12	8	16	48.554	22.12	8	16	386.207	25.66	10	22	62.1725	28.54	11	24	295.586	21.24	8	13	45.1535	26.33	10	19	866.914	37.61	18	46	120.36	48.45	23	60	865.1	36.28	17	41	102.417	58.41
P11142	Heat shock cognate 71 kDa protein OS=Homo sapiens GN=HSPA8 PE=1 SV=1 - [HSP7C_HUMAN]	67.03	18	10	40	594	1.15956e+07	1.18565e+07	9.91498e+06	1.72833e+08	1.56518e+08	801.587	33.59	15	38	103.598	40.4	18	43	743.621	35.76	18	39	104.254	39.63	22	48	914.233	35.76	18	40	114.554	40.71	20	46	592.718	29.72	17	36	81.3161	41.8	23	49	562.253	26.63	17	35	77.1716	37.31
P10809	60 kDa heat shock protein, mitochondrial OS=Homo sapiens GN=HSPD1 PE=1 SV=2 - [CH60_HUMAN]	67.02	8	14	28	532	6.08326e+06	6.55441e+06	5.40768e+06	9.63843e+07	8.08076e+07	1221.51	43.28	18	40	135.588	48.52	19	42	1253.28	46.95	16	35	134.194	46.95	16	36	872.997	37.87	15	34	117.723	37.87	15	37	641.027	34.9	15	28	83.5571	42.23	17	34	969.161	41.88	19	36	100.902	47.29
P38646	Stress-70 protein, mitochondrial OS=Homo sapiens GN=HSPA9 PE=1 SV=2 - [GRP75_HUMAN]	67.01	5	29	47	477	6.24136e+06	3.30817e+06	4.54903e+06	3.85607e+07	3.87283e+07	661.466	26.51	15	27	79.1613	30.93	16	33	561.61	25.92	14	25	76.4921	28.42	16	30	577.218	26.66	16	29	86.4704	33.28	20	37	708.67	36.52	23	39	93.7633	40.5	25	41	693.176	32.11	21	36	83.894	30.63
Q5TEC6	Histone cluster 2, H3, pseudogene 2 OS=Homo sapiens GN=HIST2H3PS2 PE=3 SV=1 - [Q5TEC6_HUMAN]	66.91	2	1	11	149	1.39997e+07	1.53726e+07	1.30206e+07	1.27266e+08	1.06497e+08	35.4013	29.41	6	12	13.4531	29.41	5	13	38.7222	16.91	3	8	18.0346	29.41	5	17	50.0722	29.41	5	14	15.3065	29.41	6	14	38.56	25	4	10	15.185	57.35	8	14	27.65	19.85	3	4	5.52115	24.26
P63241-2	Isoform 2 of Eukaryotic translation initiation factor 5A-1 OS=Homo sapiens GN=EIF5A - [IF5A1_HUMAN]	66.85	7	4	10	44	1.79588e+06	811400	1.24176e+06	2.77863e+07	5.36576e+07					0	12.5	2	2					2.58871	12.5	2	2					0	5.98	1	1	65.91	10.87	2	5	12.3819	25.54	3	7	75.36	6.52	1	4	14.0491	21.2
P04792	Heat shock protein beta-1 OS=Homo sapiens GN=HSPB1 PE=1 SV=2 - [HSPB1_HUMAN]	66.83	4	10	13	193	3.67946e+06	5.99699e+06	3.61319e+06	6.66778e+07	3.02745e+07	134.686	35.61	4	9	30.3138	47.32	7	13	221.713	48.29	7	15	45.0741	48.29	7	17	218.799	48.78	7	13	43.9466	54.15	9	19	196.15	44.88	7	13	36.0607	48.78	9	21	112.36	35.12	5	9	22.9366	39.02
P27635	60S ribosomal protein L10 OS=Homo sapiens GN=RPL10 PE=1 SV=4 - [RL10_HUMAN]	66.82	3	1	12	37	0	0	606494	2.00144e+07	2.03271e+07					0	16.82	1	1													0	11.21	2	2	43.8282	14.02	3	4	7.95116	18.69	4	5	22.09	16.36	4	5	6.22503	32.71
P30049	ATP synthase subunit delta, mitochondrial OS=Homo sapiens GN=ATP5D PE=1 SV=2 - [ATPD_HUMAN]	66.67	1	3	6	72	5.77191e+06	6.85149e+06	4.76241e+06	1.95386e+07	1.73836e+07	179.108	13.69	2	7	22.983	13.69	2	8	118.544	13.69	2	4	11.748	13.69	2	4	185.657	11.9	2	6	15.6973	32.74	3	6	94.9896	13.69	2	4	11.2332	18.45	3	5	94.6727	13.69	2	4	10.1327	18.45
B3KQT9	Uncharacterized protein OS=Homo sapiens GN=PDIA3 PE=2 SV=1 - [B3KQT9_HUMAN]	66.46	4	23	35	560	9.80519e+06	1.07417e+07	8.2854e+06	1.10123e+08	9.87292e+07	966.617	46.04	18	44	111.258	47.92	20	47	885.555	48.33	19	45	116.058	52.71	22	49	703.87	48.33	19	40	102.771	53.54	22	49	417.938	32.71	14	27	59.0401	38.75	16	33	371.975	29.38	12	26	46.1868	32.5
B4DW94	Uncharacterized protein OS=Homo sapiens GN=RAP1B PE=2 SV=1 - [B4DW94_HUMAN]	66.42	10	1	7	126	7.54272e+06	7.60606e+06	6.60743e+06	5.98463e+07	4.84556e+07	195.898	40.88	5	9	15.8684	40.88	5	9	262.181	40.88	5	10	25.4804	45.99	6	10	262.915	40.88	5	10	22.9396	40.88	5	10	203.296	40.88	5	9	23.4416	45.99	6	12	298.663	40.88	5	10	25.148	45.99
Q9UJC5	SH3 domain-binding glutamic acid-rich-like protein 2 OS=Homo sapiens GN=SH3BGRL2 PE=1 SV=2 - [SH3L2_HUMAN]	66.36	1	1	4	8	0	0	0	1.11123e+07	2.26016e+07																					2.19321	12.15	1	1					1.60578	42.06	3	4					0	46.73
P68371	Tubulin beta-2C chain OS=Homo sapiens GN=TUBB2C PE=1 SV=1 - [TBB2C_HUMAN]	66.29	11	1	24	400	1.13754e+07	1.12435e+07	7.66851e+06	1.62531e+08	1.428e+08	695.064	38.65	11	24	88.3897	40.45	12	30	754.036	40.9	12	24	94.7721	50.56	14	31	739.459	43.15	13	28	99.9785	48.54	15	33	817.651	56.18	17	44	124.464	57.53	18	46	757.899	48.76	15	42	116.565	53.48
P13693	Translationally-controlled tumor protein OS=Homo sapiens GN=TPT1 PE=1 SV=1 - [TCTP_HUMAN]	66.28	4	4	8	54	0	0	354893	3.26886e+07	1.43117e+07	43.63	27.33	1	1	0	27.33	1	1													0	15.7	2	2	23.08	4.65	1	4	1.82574	13.37	3	6	23.4	4.65	1	4	3.82128	5.81
P05787	Keratin, type II cytoskeletal 8 OS=Homo sapiens GN=KRT8 PE=1 SV=7 - [K2C8_HUMAN]	66.25	24	24	46	725	5.74798e+07	5.38852e+07	4.99021e+07	3.02251e+08	2.62087e+08	1054.91	47.83	24	51	134.449	48.45	28	57	1126.51	53.83	28	62	141.14	52.59	27	61	1084.64	44.31	22	54	136.576	46.58	23	56	910.685	44.72	24	52	103.355	50.52	25	53	751.535	41.82	22	46	89.8796	44.31
F6XY72	Nucleoside diphosphate kinase OS=Homo sapiens GN=NME1-NME2 PE=3 SV=1 - [F6XY72_HUMAN]	66.23	1	1	4	46	779204	0	781294	0	4.78763e+06	48.61	22.08	1	2	7.15141	22.08	1	2	59.24	22.08	1	2	6.46479	22.08	1	2	74.05	22.08	1	2	6.6934	22.08	1	2									31.59	22.08	1	1	3.55379	22.08
P08238	Heat shock protein HSP 90-beta OS=Homo sapiens GN=HSP90AB1 PE=1 SV=4 - [HS90B_HUMAN]	66.02	11	13	48	466	6.78798e+06	6.90205e+06	5.50353e+06	1.59877e+08	1.46914e+08	463.266	17.68	9	20	48.4492	22.51	12	23	480.335	18.78	11	22	49.6675	23.07	12	27	464.238	22.51	12	23	59.6346	41.71	21	37	441.921	14.92	11	29	51.7136	26.93	18	37	491.354	15.06	11	29	59.8202	25.14
P78371	T-complex protein 1 subunit beta OS=Homo sapiens GN=CCT2 PE=1 SV=4 - [TCPB_HUMAN]	65.98	4	19	28	233	2.28479e+06	2.07106e+06	1.49974e+06	8.44501e+07	5.048e+07	581.749	35.33	13	21	65.8988	36.82	13	22	497.186	30.84	11	19	57.1801	37.76	14	24	559.05	34.39	13	21	58.7616	34.58	12	22	312.591	19.44	8	13	31.2385	31.59	11	20	253.15	17.94	7	11	26.028	26.54
F5H3X6	Uncharacterized protein OS=Homo sapiens GN=PHB2 PE=4 SV=1 - [F5H3X6_HUMAN]	65.91	3	1	13	99	1.1146e+06	2.39522e+06	1.5931e+06	3.16031e+07	4.83421e+07	143.07	22.73	4	6	16.8241	50.91	7	11	176.089	26.36	5	7	21.8574	35.45	6	9	175.21	25.45	4	6	20.6748	35.45	6	8	120.97	21.36	4	5	14.8061	21.36	4	7	107.26	11.36	2	4	14.5791	16.36
E5RJZ1	Uncharacterized protein OS=Homo sapiens GN=COX7A2L PE=4 SV=1 - [E5RJZ1_HUMAN]	65.82	2	2	3	12	0	499641	326477	0	0					0	16.46	1	1	24.9	16.46	1	1	1.74824	16.46	1	1					3.61371	16.46	1	2
P10599	Thioredoxin OS=Homo sapiens GN=TXN PE=1 SV=3 - [THIO_HUMAN]	65.71	2	2	5	52	0	593347	0	1.61159e+08	1.06716e+08													0	8.57	1	1									136.55	20.95	2	3	7.9918	20.95	2	3	160.06	20.95	2	4	10.5848	62.86
P04083	Annexin A1 OS=Homo sapiens GN=ANXA1 PE=1 SV=2 - [ANXA1_HUMAN]	65.61	3	15	21	254	3.06285e+06	2.346e+06	2.49387e+06	4.50672e+07	3.28782e+07	307.139	33.82	8	13	38.1438	39.88	10	16	454.158	42.77	10	14	44.4115	51.16	13	18	311.62	31.21	8	14	40.6672	39.31	10	18	439.974	42.49	12	22	51.9937	43.93	12	24	402.359	32.66	10	19	43.204	36.71
P11021	78 kDa glucose-regulated protein OS=Homo sapiens GN=HSPA5 PE=1 SV=2 - [GRP78_HUMAN]	65.6	7	37	50	1130	1.25084e+07	1.40958e+07	1.08995e+07	5.55977e+08	4.79585e+08	1589.07	43.43	25	62	184.629	49.85	29	73	1779.04	46.48	26	59	188.405	46.64	28	69	1697.56	47.86	27	65	187.916	48.32	28	70	1772.23	46.48	25	65	185.231	51.83	33	87	1931.98	50.46	29	75	221.481	52.29
E5RJD8	Uncharacterized protein OS=Homo sapiens GN=TBCA PE=4 SV=1 - [E5RJD8_HUMAN]	65.55	6	1	8	25	0	0	1.73757e+06	1.18407e+08	2.23233e+07					0	10.92	1	1													1.60046	18.49	2	3					0	47.06	4	6					1.60221	8.4
F5H559	Uncharacterized protein OS=Homo sapiens GN=EHD2 PE=4 SV=1 - [F5H559_HUMAN]	65.29	8	17	29	199	985514	1.66094e+06	2.28127e+06	8.01908e+07	3.86581e+07	275.026	13.32	5	8	27.5653	19.14	8	13	332.865	15.57	4	9	37.4896	20.26	6	12	303.1	21.76	7	11	34.2895	22.89	9	15	555.208	27.02	12	24	51.3065	32.08	15	26	502.872	33.02	16	27	53.3146	34.15
P30041	Peroxiredoxin-6 OS=Homo sapiens GN=PRDX6 PE=1 SV=3 - [PRDX6_HUMAN]	65.18	1	10	15	105	534762	1.18263e+06	0	3.00519e+07	30793273					0	9.82	1	1	37.29	12.5	2	2	4.38132	24.11	4	5									156.951	24.11	7	11	27.0766	31.7	8	13	178.204	31.7	8	15	33.9096	31.7
B7Z6Z4	Uncharacterized protein OS=Homo sapiens GN=MYL6 PE=2 SV=1 - [B7Z6Z4_HUMAN]	65.13	13	7	16	427	3.36391e+07	3.49956e+07	3.03067e+07	4.19326e+08	3.51098e+08	648.876	33.61	8	34	93.4227	43.28	11	37	743.013	33.61	8	34	97.9219	47.06	10	37	651.155	28.57	7	27	88.869	44.12	9	32	750.329	35.29	9	32	97.418	35.29	9	37	853.796	35.29	9	36	99.1411	35.29
P82909	28S ribosomal protein S36, mitochondrial OS=Homo sapiens GN=MRPS36 PE=1 SV=2 - [RT36_HUMAN]	65.05	2	4	5	19	0	0	0	0	1.42971e+07																																	43.3133	25.24	2	3	5.03813	17.48
P49411	Elongation factor Tu, mitochondrial OS=Homo sapiens GN=TUFM PE=1 SV=2 - [EFTU_HUMAN]	65.04	1	17	25	237	1.68948e+06	2.14331e+06	2.52987e+06	3.1412e+07	3.11399e+07	215.703	24.12	8	12	32.8942	27.88	9	16	309.784	32.74	11	19	45.643	40.27	13	22	248.2	28.76	9	15	40.407	35.18	11	18	169.489	21.46	8	16	36.0939	23.45	9	18	106.806	28.1	11	17	36.2096	32.3
Q9UKM9	RNA-binding protein Raly OS=Homo sapiens GN=RALY PE=1 SV=1 - [RALY_HUMAN]	65.03	6	2	12	18	1.30653e+06	0	500241	2.18724e+07	0					0	7.52	2	2					3.64696	9.48	3	5					0	2.61	1	1					0	23.53	3	4					1.63563	5.88
P35908	Keratin, type II cytoskeletal 2 epidermal OS=Homo sapiens GN=KRT2 PE=1 SV=2 - [K22E_HUMAN]	64.95	8	19	37	341	6.37462e+06	6.7179e+06	5.04944e+06	6.85719e+07	5.36202e+07	277.054	19.72	11	21	44.7484	23.63	12	21	379.219	20.34	11	22	57.517	30.67	15	26	212.658	16.59	9	17	40.0516	28.95	11	19	256.626	18.31	11	19	37.3812	20.03	12	23	267.372	19.25	12	24	44.7431	19.25
P63104	14-3-3 protein zeta/delta OS=Homo sapiens GN=YWHAZ PE=1 SV=1 - [1433Z_HUMAN]	64.9	19	9	20	397	8.50768e+06	1.14456e+07	8.04602e+06	1.78015e+08	1.78683e+08	479.997	44.49	9	19	54.059	46.94	10	21	486.077	42.86	9	17	54.0197	54.29	13	22	402.253	47.76	10	16	51.2129	47.76	10	18	827.018	51.43	13	36	104.94	54.69	14	40	733.938	51.43	13	36	91.7849	58.37
E9PKF3	Uncharacterized protein OS=Homo sapiens GN=ACAT1 PE=3 SV=1 - [E9PKF3_HUMAN]	64.81	1	2	3	18	688711	1.13852e+06	1.07005e+06	0	2.32105e+06					0	64.81	2	4					0	37.04	1	1					0	37.04	1	2													0	64.81
P02649	Apolipoprotein E OS=Homo sapiens GN=APOE PE=1 SV=1 - [APOE_HUMAN]	64.67	3	7	21	75	6.95464e+06	7.69878e+06	2.74885e+06	1.78933e+08	3.5498e+07					0	13.56	3	3					0	9.78	2	3	0	2.52	1	1	2.23971	21.45	4	4	191.294	15.77	4	8	20.2932	35.33	9	15	95.67	16.09	4	6	12.2274	32.18
P13667	Protein disulfide-isomerase A4 OS=Homo sapiens GN=PDIA4 PE=1 SV=2 - [PDIA4_HUMAN]	64.5	2	31	46	656	7.07335e+06	6.54337e+06	5.00428e+06	1.00136e+08	8.92768e+07	1341.64	42.79	22	44	143.955	47.13	26	55	1171.54	38.76	20	43	129.073	44.19	23	52	1107.34	43.57	22	42	120.302	51.63	27	53	500.383	29.15	17	31	74.0274	32.4	21	43	733.468	33.02	20	40	93.3717	39.84
Q9BTK2	Putative uncharacterized protein LOC642776 OS=Homo sapiens PE=5 SV=2 - [YX002_HUMAN]	64.44	1	1	3	11	3.40128e+06	0	0	0	5.58112e+06					0	35.56	1	1													0	35.56	1	2													0	64.44
P30086	Phosphatidylethanolamine-binding protein 1 OS=Homo sapiens GN=PEBP1 PE=1 SV=3 - [PEBP1_HUMAN]	64.17	2	6	7	90	905774	857450	0	5.32372e+06	8.908e+06					8.96506	21.39	2	4	59.59	32.09	3	3	9.96647	35.83	3	4					3.23583	17.11	1	1	82.1733	22.99	3	5	7.61117	22.99	3	5	124.66	22.99	3	6	12.2039	22.99
O75531	Barrier-to-autointegration factor OS=Homo sapiens GN=BANF1 PE=1 SV=1 - [BAF_HUMAN]	64.04	1	2	4	42	0	2.40632e+06	3.44589e+06	1.42788e+07	1.1123e+07	134.598	13.48	1	2	7.16452	13.48	1	2	155.882	40.45	2	4	13.9028	40.45	2	4	129.064	40.45	2	4	12.1388	40.45	2	4	57.8233	26.97	1	3	6.25675	38.2	2	5					0	50.56
P13073	Cytochrome c oxidase subunit 4 isoform 1, mitochondrial OS=Homo sapiens GN=COX4I1 PE=1 SV=1 - [COX41_HUMAN]	63.91	1	7	13	187	3.34383e+06	3.60205e+06	2.66254e+06	1.2886e+08	1.20265e+08	45.6543	37.28	6	9	10.5773	33.73	5	9	87.3167	36.69	6	11	10.0772	34.91	6	10	111.905	26.04	4	8	13.1043	33.14	5	9	272.201	42.6	7	18	37.0666	36.69	6	17	248.66	36.69	6	15	34.7551	42.01
P62244	40S ribosomal protein S15a OS=Homo sapiens GN=RPS15A PE=1 SV=2 - [RS15A_HUMAN]	63.85	1	6	8	45	2.13381e+06	2.37182e+06	1.10656e+06	19052124	0	89.1	20	2	4	8.04712	20	2	4	187.01	37.69	4	8	25.0705	44.62	5	9	43.5	20	2	3	4.23292	20	2	3					0	6.15	1	1					0	6.15
P51149	Ras-related protein Rab-7a OS=Homo sapiens GN=RAB7A PE=1 SV=1 - [RAB7A_HUMAN]	63.77	7	9	11	102	1.4436e+06	1.28337e+06	676862	3.30437e+07	2.68758e+07	146.46	11.59	2	4	15.1289	28.02	4	7	150.9	16.43	3	5	16.3396	32.85	5	7	169.935	25.12	4	8	22.284	43.96	7	12	174.183	30.92	6	9	18.5319	28.02	5	7	168.2	20.77	4	7	18.9439	25.6
P14625	Endoplasmin OS=Homo sapiens GN=HSP90B1 PE=1 SV=1 - [ENPL_HUMAN]	63.76	6	49	68	1406	3.90011e+07	3.81702e+07	3.39455e+07	2.98347e+08	2.70134e+08	1880.95	51.06	40	107	267.214	51.31	42	117	1679.41	47.2	42	105	251.127	50.68	44	119	1581.51	41.47	35	99	232.199	45.58	40	108	1570.9	42.84	36	94	218.304	43.59	39	102	1675.26	45.33	38	92	207.067	47.7
P07355	Annexin A2 OS=Homo sapiens GN=ANXA2 PE=1 SV=2 - [ANXA2_HUMAN]	63.72	4	21	27	791	2.04115e+07	2.02869e+07	1.52619e+07	4.24522e+08	3.89472e+08	973.973	52.21	18	49	138.729	53.98	19	51	1075.26	53.1	17	45	131.452	55.46	19	51	961.207	50.44	17	50	129.935	47.79	15	50	1434.09	57.82	21	72	195.915	58.41	22	81	1468.01	58.11	21	78	198.227	58.41
C9J406	Uncharacterized protein OS=Homo sapiens GN=IMMT PE=4 SV=1 - [C9J406_HUMAN]	63.58	7	1	42	325	1.08372e+06	3.02875e+06	1.248e+06	1.38118e+08	9.79757e+07	223.73	11.99	5	10	33.5084	19.58	8	14	293.732	19.27	10	15	37.344	22.91	10	15	264.97	14.11	7	13	39.7892	22.91	12	20	422.315	34.14	17	34	65.6747	40.52	22	39	319.375	37.78	21	40	66.6466	45.07
O43852	Calumenin OS=Homo sapiens GN=CALU PE=1 SV=2 - [CALU_HUMAN]	63.49	7	5	16	82	709758	1.2089e+06	1.21866e+06	1.42538e+08	1.0044e+08	118.496	7.62	2	4	15.3236	10.79	3	6	134.62	10.79	3	5	15.4845	23.81	4	7	104.01	7.62	2	4	11.2585	27.94	5	7	165.092	38.1	8	10	19.7765	49.84	12	13	53.33	16.51	4	6	10.1793	16.51
Q8IUE6	Histone H2A type 2-B OS=Homo sapiens GN=HIST2H2AB PE=1 SV=3 - [H2A2B_HUMAN]	63.08	2	3	6	176	1.16319e+08	7.48914e+07	3.97296e+07	6.16921e+08	3.52381e+08	284.329	63.08	6	17	47.3799	63.08	6	17	218.712	40.77	5	14	39.2274	40.77	5	14	340.344	63.08	6	17	51.318	63.08	6	17	148.638	12.31	2	12	28.0806	12.31	2	13	164.15	12.31	2	13	28.5468	17.69
F8VW92	Uncharacterized protein OS=Homo sapiens GN=TUBB PE=4 SV=1 - [F8VW92_HUMAN]	62.99	16	3	21	405	1.30379e+07	1.38662e+07	8.92527e+06	154054649	1.30165e+08	598.876	32.87	9	22	84.1389	34.71	10	30	818.129	39.08	11	27	107.138	48.97	13	36	716.671	41.38	12	29	109.831	43.45	13	37	883.894	54.71	16	45	127.603	56.09	17	46	812.736	47.13	14	41	118.248	51.95
C9J6F3	Uncharacterized protein OS=Homo sapiens GN=PDCD10 PE=4 SV=1 - [C9J6F3_HUMAN]	62.9	6	3	8	28	167904	0	0	5689603	3.76116e+06					0	15.05	2	2					0	6.45	1	1					0	18.82	2	2	52.82	12.9	1	2	4.70242	40.32	3	5	37.9	12.9	1	1	1.65654	21.51
P21333-2	Isoform 2 of Filamin-A OS=Homo sapiens GN=FLNA - [FLNA_HUMAN]	62.86	7	92	131	2744	3.15787e+07	3.26926e+07	2.28203e+07	2.60936e+08	2.28599e+08	4532.94	45.74	86	232	647.696	50.93	94	262	4172.45	42.9	81	207	589.11	46.12	90	240	3861.28	42.18	84	198	544.342	47.4	94	232	4172.12	43.62	88	213	557.271	44.94	91	238	4129.64	41.23	84	209	554.195	43.73
Q99714	3-hydroxyacyl-CoA dehydrogenase type-2 OS=Homo sapiens GN=HSD17B10 PE=1 SV=3 - [HCD2_HUMAN]	62.84	3	8	12	123	1.46944e+06	1.73897e+06	1.00999e+06	1.62106e+07	1.1771e+07	340.627	19.54	3	7	30.9251	22.99	4	9	381.553	14.18	2	6	27.2974	14.18	2	6	346.705	30.65	4	8	31.0666	30.65	4	8	231.564	26.05	5	10	24.5973	26.05	6	11	212.377	30.65	5	8	25.6413	27.59
P04264	Keratin, type II cytoskeletal 1 OS=Homo sapiens GN=KRT1 PE=1 SV=6 - [K2C1_HUMAN]	62.58	11	24	46	541	7.34093e+06	7.65553e+06	5.93341e+06	1.89104e+08	1.46113e+08	1009.7	29.35	17	36	97.861	36.18	20	42	808.089	28.57	17	32	81.5996	29.04	17	36	938.899	33.7	19	38	94.3663	44.88	24	46	902.549	30.43	20	40	85.93	36.34	22	47	1007.53	31.83	21	44	107.196	38.2
Q8WU39	Plasma cell-induced resident endoplasmic reticulum protein OS=Homo sapiens GN=PACAP PE=1 SV=1 - [PERP1_HUMAN]	62.43	6	8	10	113	1.71481e+06	1.7802e+06	4.00957e+06	1.72115e+08	2.22818e+08	29.96	13.23	1	2	6.43924	13.23	1	2	112.26	19.58	2	4	11.9441	19.58	2	4	97.4167	24.87	3	5	13.0356	29.1	3	5	296.2	35.45	5	17	40.3077	48.68	8	21	394.39	49.74	7	16	48.0265	49.74
Q9P2E9	Ribosome-binding protein 1 OS=Homo sapiens GN=RRBP1 PE=1 SV=4 - [RRBP1_HUMAN]	62.27	5	32	76	547	3.71595e+06	3.93333e+07	2.37168e+06	2.57433e+07	3.65236e+07	526.372	12.55	14	29	70.8899	15.18	17	33	473.711	12.06	13	25	73.9725	22.55	26	41	615.311	13.76	15	26	65.2031	16.88	18	32	341.149	25.6	17	28	66.9421	30.78	26	44	507.21	18.37	19	32	78.7577	25.04
P0CG05	Ig lambda-2 chain C regions OS=Homo sapiens GN=IGLC2 PE=1 SV=1 - [LAC2_HUMAN]	62.26	3	2	5	270	2.18642e+07	2.52232e+07	1.84852e+07	179298032	1.5244e+08	349.719	41.51	3	20	63.2125	41.51	3	21	286.568	41.51	3	19	55.4214	41.51	3	20	281.506	41.51	3	20	59.4157	41.51	3	21	337.652	41.51	3	18	54.2485	41.51	3	19	293.811	41.51	3	16	48.0899	41.51
P25705	ATP synthase subunit alpha, mitochondrial OS=Homo sapiens GN=ATP5A1 PE=1 SV=1 - [ATPA_HUMAN]	62.21	2	29	34	863	1.58259e+07	1.79794e+07	1.32175e+07	2.8037e+08	360767056	1640.24	49.19	22	50	152.703	50.63	23	54	1578.37	43.94	22	55	141.847	42.5	21	54	1369.82	42.68	21	48	130.347	48.28	23	53	1294.41	55.7	28	70	164.982	56.6	29	73	1048.27	47.02	24	56	115.665	51.54
E7ETZ0	Uncharacterized protein OS=Homo sapiens GN=CALM1 PE=4 SV=1 - [E7ETZ0_HUMAN]	62	7	8	13	397	8.39185e+06	8.00182e+06	8.29134e+06	2.01003e+08	1.68951e+08	403.143	44	8	21	56.8285	58.67	10	27	510.896	48.67	9	24	60.9173	48.67	9	27	437.168	48.67	9	25	59.3184	59.33	11	29	766.149	51.33	10	35	80.3569	51.33	10	38	785.609	51.33	10	33	78.1959	61.33
Q13630	GDP-L-fucose synthase OS=Homo sapiens GN=TSTA3 PE=1 SV=1 - [FCL_HUMAN]	61.99	2	2	13	31	0	0	0	1.84831e+07	1.38554e+07					0	12.77	2	2					0	8.41	2	2					0	9.03	2	2	68.9492	4.67	1	2	4.1038	26.17	4	5	34.93	6.85	2	3	3.57589	24.92
P04350	Tubulin beta-4 chain OS=Homo sapiens GN=TUBB4 PE=1 SV=2 - [TBB4_HUMAN]	61.94	4	1	24	293	5.76787e+06	6.30997e+06	4.49244e+06	1.62531e+08	1.428e+08	447.735	33.33	9	17	55.5994	33.33	9	18	459.732	33.78	9	16	58.1242	46.17	12	21	409.177	31.98	9	19	61.5943	40.99	12	22	601.85	44.82	12	34	90.4284	46.17	13	35	568.047	37.61	11	34	90.4602	46.4
P22626	Heterogeneous nuclear ribonucleoproteins A2/B1 OS=Homo sapiens GN=HNRNPA2B1 PE=1 SV=2 - [ROA2_HUMAN]	61.76	2	10	22	177	1.11724e+07	1.22711e+07	9.82949e+06	7.7891e+06	4.0425e+06	263.968	18.41	6	9	21.0369	28.33	10	16	306.451	22.95	8	17	33.4588	30.88	10	23	288.579	20.68	7	14	29.0905	25.5	10	22	37.9	4.53	2	4	2.60885	16.43	4	5	34.9537	8.22	3	4	6.38028	8.22
P18085	ADP-ribosylation factor 4 OS=Homo sapiens GN=ARF4 PE=1 SV=3 - [ARF4_HUMAN]	61.67	14	5	13	192	3.48265e+06	3.4335e+06	2.56716e+06	7.21894e+07	7.84803e+07	149.007	47.22	7	14	47.1244	47.22	7	16	273.493	42.78	6	12	38.7486	42.78	6	12	295.64	48.33	8	16	47.6046	56.67	9	16	288.301	58.89	9	19	45.8913	58.89	9	21	167.168	48.89	8	13	32.7392	58.33
P37235	Hippocalcin-like protein 1 OS=Homo sapiens GN=HPCAL1 PE=1 SV=3 - [HPCL1_HUMAN]	61.66	5	6	13	58	1.28128e+07	1.36603e+07	1.22067e+07	1.48506e+07	3.2855e+07					0	6.74	1	3					0	6.74	1	1					0	19.17	3	5	96.439	22.28	5	8	10.099	27.46	6	8	109.677	17.1	3	5	10.1456	33.68
P08754	Guanine nucleotide-binding protein G(k) subunit alpha OS=Homo sapiens GN=GNAI3 PE=1 SV=3 - [GNAI3_HUMAN]	61.58	9	2	19	134	5.83002e+06	6.34741e+06	3.79295e+06	1.06655e+08	8.47703e+07	123.849	10.17	4	9	18.2032	13.84	6	12	135.92	12.99	4	9	20.9442	24.29	7	12	96.3034	12.99	4	9	22.7381	19.49	6	11	137.94	15.25	5	13	24.9977	16.95	6	16	112.178	19.21	7	15	26.1414	20.62
D6RIE3	Uncharacterized protein OS=Homo sapiens GN=COX7A2 PE=4 SV=1 - [D6RIE3_HUMAN]	61.54	5	2	4	65	0	1836795	1.84651e+06	4.89728e+07	6.13583e+07	142.94	14.29	1	2	6.12046	39.56	2	3	122.4	14.29	1	2	6.71547	14.29	1	2	122.32	14.29	1	2	6.6893	14.29	1	2	213.957	25.27	2	5	17.1937	61.54	4	7	214.907	25.27	2	5	16.6669	25.27
P00918	Carbonic anhydrase 2 OS=Homo sapiens GN=CA2 PE=1 SV=2 - [CAH2_HUMAN]	61.54	3	9	12	163	807069	888674	5.59144e+06	1.68176e+07	8.89329e+06	106.811	20.38	4	6	15.957	45.77	8	11	134.38	21.54	4	6	17.0931	32.31	6	12	38.74	25	5	7	13.865	31.92	6	11	51.56	12.31	3	6	5.52578	16.92	4	7	35.8	14.62	3	4	8.17492	19.23
F8VXY0	Uncharacterized protein OS=Homo sapiens GN=HNRNPA1 PE=4 SV=1 - [F8VXY0_HUMAN]	61.51	14	6	16	91	4.49472e+06	1.69827e+06	2.28833e+06	4.66403e+06	265688	97.304	9.54	3	4	7.44229	22.04	5	8	87.4317	12.17	4	9	12.9924	28.29	6	13	138.565	10.53	3	7	10.7429	40.13	8	12	37.9	9.54	3	5	4.31914	9.54	3	4	29.82	2.96	1	2	4.49642	9.87
P30501	HLA class I histocompatibility antigen, Cw-2 alpha chain OS=Homo sapiens GN=HLA-C PE=1 SV=1 - [1C02_HUMAN]	61.48	9	2	19	167	5.33853e+06	7.83718e+06	4.711e+06	1.04085e+08	8.62681e+07	149.246	19.67	6	12	24.9809	29.51	8	14	209.888	18.03	5	9	26.0266	37.98	8	13	159.966	15.85	5	10	21.254	14.21	4	9	293.169	20.22	6	16	43.8577	30.87	8	19	252.764	25.68	7	17	47.0729	34.97
Q15063-3	Isoform 3 of Periostin OS=Homo sapiens GN=POSTN - [POSTN_HUMAN]	61.46	5	3	38	545	5.02805e+06	9.62866e+06	3.19393e+06	2.38022e+08	2.67469e+08	609.331	35.08	18	32	80.4475	41.36	21	37	568.657	31.5	17	34	89.0592	39.95	21	39	534.025	27.14	14	28	77.1341	30.47	16	34	1223.77	44.81	23	57	183.616	44.81	24	73	1181.99	43.41	23	56	158.364	44.81
P12277	Creatine kinase B-type OS=Homo sapiens GN=CKB PE=1 SV=1 - [KCRB_HUMAN]	61.42	2	13	22	517	3.25648e+06	8.70646e+06	5.71636e+06	1.74207e+08	1.90435e+08	342.518	19.16	5	11	29.2268	27.03	7	14	283.46	28.87	8	13	38.8832	38.85	11	20	280.13	29.13	8	14	36.3536	35.96	11	18	1312.74	54.59	15	50	138.926	56.43	18	56	1539.73	54.59	16	53	159.823	59.58
Q01082	Spectrin beta chain, brain 1 OS=Homo sapiens GN=SPTBN1 PE=1 SV=2 - [SPTB2_HUMAN]	60.91	8	83	131	1120	7.95231e+06	2.1166e+07	1.5316e+07	5.17464e+07	5.82386e+07	731.815	20.94	36	51	131.557	27.33	43	63	978.411	21.32	38	62	164.984	27.66	49	79	814.177	24.24	40	63	165.519	29.4	48	81	2398.4	34.39	63	124	326.415	41.58	74	144	2191.11	33.08	63	125	291.967	38.62
P32321-2	Isoform 2 of Deoxycytidylate deaminase OS=Homo sapiens GN=DCTD - [DCTD_HUMAN]	60.85	3	1	10	18	1.24983e+06	2.64388e+06	0	3.26537e+07	8.96337e+06					0	21.69	2	3					2.07807	22.22	3	4					0	11.11	1	1					3.48391	29.63	4	4					3.62627	16.4
Q16836	Hydroxyacyl-coenzyme A dehydrogenase, mitochondrial OS=Homo sapiens GN=HADH PE=1 SV=3 - [HCDH_HUMAN]	60.83	5	10	13	125	1.133e+06	1.22214e+06	909427	1.38958e+07	1.06637e+07	29.51	14.97	3	3	5.46775	13.69	3	5	26.78	15.61	4	6	7.6081	11.78	3	6	27	19.43	3	3	9.16561	27.39	6	9	53.995	19.75	3	4	9.07818	26.11	5	6	24.71	10.19	2	3	2.46161	13.06
P35321	Cornifin-A OS=Homo sapiens GN=SPRR1A PE=1 SV=2 - [SPR1A_HUMAN]	60.67	1	1	3	3	0	0	0	0	0					0	24.72	1	1					0	17.98	1	1					0	17.98	1	1
Q15063-4	Isoform 4 of Periostin OS=Homo sapiens GN=POSTN - [POSTN_HUMAN]	60.59	3	1	36	534	5.02805e+06	9.62866e+06	3.19393e+06	2.38022e+08	2.67469e+08	585.328	35.95	18	29	77.3565	42.48	21	35	546.444	32.22	17	32	86.3584	41.01	21	37	520.965	27.7	14	28	74.7248	31.16	16	33	1183.58	43.28	21	55	170.029	43.28	22	68	1137.74	43.54	22	55	152.866	45.01
P04075	Fructose-bisphosphate aldolase A OS=Homo sapiens GN=ALDOA PE=1 SV=2 - [ALDOA_HUMAN]	60.44	2	14	19	248	1.87871e+06	2.41717e+06	1.91915e+06	4.35882e+07	3.20336e+07	147.481	34.07	9	14	31.9045	34.07	9	16	142.434	25.82	8	16	34.6325	28.3	9	17	118.403	23.9	7	14	31.9157	24.18	8	16	317.797	28.02	9	16	29.0116	31.32	10	20	298.76	21.98	6	13	32.7233	27.75
P62834	Ras-related protein Rap-1A OS=Homo sapiens GN=RAP1A PE=1 SV=1 - [RAP1A_HUMAN]	60.33	10	2	10	168	7.54272e+06	7.60606e+06	6.60743e+06	5.98463e+07	4.98338e+07	251.523	38.59	6	12	25.4071	38.59	6	12	294.261	38.59	6	12	32.5935	38.59	6	11	369.2	38.59	6	12	30.6513	53.26	7	13	278.679	38.59	7	14	39.826	42.39	8	17	421.533	41.85	8	16	44.8198	41.85
P02675	Fibrinogen beta chain OS=Homo sapiens GN=FGB PE=1 SV=2 - [FIBB_HUMAN]	60.29	3	16	25	188	1.11797e+07	6.04692e+06	4.8532e+06	5.48599e+07	4.43916e+07	155.797	22.4	8	11	23.3522	33.6	12	19	131.566	11.2	5	9	15.8212	15.68	7	12	198.49	12.42	5	13	22.2778	27.49	13	21	253.18	16.09	7	15	21.0812	21.18	9	15	367.019	28.92	12	24	31.6599	37.47
P35232	Prohibitin OS=Homo sapiens GN=PHB PE=1 SV=1 - [PHB_HUMAN]	60.29	7	11	14	185	3.98127e+06	4.07575e+06	3.61173e+06	3.8277e+07	4.87878e+07	342.263	34.93	8	13	32.9793	30.88	7	12	270.812	27.21	7	14	26.6845	31.25	8	14	427.776	40.81	9	17	41.7541	40.81	9	16	188.886	24.63	6	11	19.7425	30.51	8	13	189.373	27.94	7	12	18.9268	38.6
Q96BQ1	Protein FAM3D OS=Homo sapiens GN=FAM3D PE=1 SV=1 - [FAM3D_HUMAN]	60.27	1	1	11	29	669844	5.59788e+06	689026	6.64413e+06	2.20167e+06	29.27	8.48	1	1	3.8319	21.88	3	3	44.01	8.48	1	2	6.59557	33.93	5	7	20.96	8.48	1	1	3.36752	21.88	3	3					1.69341	6.7	1	1					0	8.04
B4DR52	Histone H2B OS=Homo sapiens GN=HIST2H2BF PE=2 SV=1 - [B4DR52_HUMAN]	60.24	12	2	12	523	8.98733e+07	9.04499e+07	7.64961e+07	480539766	4.38588e+08	822.678	44.58	9	41	84.3877	44.58	9	44	883.887	44.58	9	45	87.7601	44.58	9	53	859.223	40.36	8	44	77.186	40.36	8	45	687.582	40.36	7	42	81.0275	52.41	9	46	889.484	44.58	9	48	87.9527	52.41
P31948	Stress-induced-phosphoprotein 1 OS=Homo sapiens GN=STIP1 PE=1 SV=1 - [STIP1_HUMAN]	60.22	4	10	32	81	1.04451e+06	1.35047e+06	284696	1.22138e+07	1.22676e+07					1.67193	18.42	6	6					0	10.5	4	5					1.72765	16.94	6	6					1.62109	10.87	4	4					1.81295	10.31
P62805	Histone H4 OS=Homo sapiens GN=HIST1H4A PE=1 SV=2 - [H4_HUMAN]	60.19	1	6	7	286	3.22037e+07	3.36974e+07	2.64357e+07	1.00981e+08	9.49897e+07	484.564	51.46	6	27	65.8769	51.46	6	28	566.486	51.46	6	23	65.2677	51.46	6	28	453.479	51.46	6	27	74.071	51.46	6	29	224.299	49.51	5	13	26.6773	40.78	4	13	176.715	49.51	5	12	27.7172	49.51
P52907	F-actin-capping protein subunit alpha-1 OS=Homo sapiens GN=CAPZA1 PE=1 SV=3 - [CAZA1_HUMAN]	60.14	1	7	12	186	3.29148e+06	4.25901e+06	3.19363e+06	1.13452e+07	1.00446e+07	347.12	40.91	8	22	58.8401	38.81	7	21	388.835	38.81	7	19	61.0922	38.81	7	21	400.342	32.52	6	17	56.1836	38.81	7	22	86.12	8.74	2	4	12.2833	17.83	4	6	136.996	19.58	4	8	19.9246	19.93
F8W7C6	Uncharacterized protein OS=Homo sapiens GN=RPL10 PE=4 SV=1 - [F8W7C6_HUMAN]	60.12	1	1	9	32	0	0	179739	7.69748e+06	9.58368e+06																					0	7.98	1	1	43.8282	18.4	3	4	6.20109	18.4	3	4	22.09	17.79	3	3	4.61644	44.17
Q9Y3E1	Hepatoma-derived growth factor-related protein 3 OS=Homo sapiens GN=HDGFRP3 PE=1 SV=1 - [HDGR3_HUMAN]	60.1	1	3	11	41	0	199774	328268	2.77555e+07	1.58487e+07													2.25457	7.39	1	1					5.50663	15.27	3	4	28.04	11.82	2	4	5.98589	45.81	7	10					0	10.84
Q05682	Caldesmon OS=Homo sapiens GN=CALD1 PE=1 SV=3 - [CALD1_HUMAN]	60.03	16	25	55	448	6.60848e+06	8.42465e+06	3.26103e+06	4.24687e+07	1.21211e+07	602.825	24.34	16	32	85.2553	38.21	27	45	787.984	30.01	20	41	101.534	34.55	25	49	773.309	26.23	17	33	92.5234	32.28	21	37	507.323	14.5	11	18	47.05	22.95	15	23	466.685	14.88	11	19	45.6975	16.9
P61026	Ras-related protein Rab-10 OS=Homo sapiens GN=RAB10 PE=1 SV=1 - [RAB10_HUMAN]	60	32	3	12	116	2188243	2.48931e+06	1.99276e+06	1.13402e+08	1.03664e+08	131.627	15	2	4	8.98626	23	4	6	111.25	21	3	5	13.6945	21	3	5	142.34	21	3	6	15.7584	21	3	8	120.112	26.5	4	8	15.1748	26.5	4	8	136.24	26.5	4	10	20.4739	33
P61978-3	Isoform 3 of Heterogeneous nuclear ribonucleoprotein K OS=Homo sapiens GN=HNRNPK - [HNRPK_HUMAN]	60	7	14	26	193	3.54104e+06	1.00033e+07	2.40497e+06	2.3532e+07	1.99127e+07	240.468	20.23	7	13	40.3052	28.18	9	16	280.379	26.36	10	19	38.3321	35.23	13	23	201.03	24.32	8	13	36.6698	27.73	9	16	201.998	18.41	6	12	26.211	22.95	7	12	149.56	16.82	6	9	24.0378	23.64
P04179	Superoxide dismutase [Mn], mitochondrial OS=Homo sapiens GN=SOD2 PE=1 SV=2 - [SODM_HUMAN]	59.91	8	7	11	120	2.69451e+06	3.61772e+06	3.40263e+06	8.18707e+07	7.1089e+07	26.64	13.51	3	8	12.9251	16.67	4	9	149.433	31.98	6	9	20.3642	31.98	6	9	69.84	26.13	5	9	23.6755	35.14	6	10	263.119	29.73	6	14	37.9736	29.73	6	16	191.883	29.73	6	11	27.7466	29.73
P35527	Keratin, type I cytoskeletal 9 OS=Homo sapiens GN=KRT9 PE=1 SV=3 - [K1C9_HUMAN]	59.87	3	20	29	253	9.4555e+06	3.74682e+06	7.95677e+06	2.26781e+08	2.3908e+08	442.32	31.14	11	20	61.1324	38.68	14	23	540.323	34.83	12	18	65.235	41.25	14	21	440.955	28.09	11	19	57.6084	37.08	14	21	445.903	24.72	10	18	48.301	27.45	12	25	613.691	32.58	13	22	65.0881	37.08
P18669	Phosphoglycerate mutase 1 OS=Homo sapiens GN=PGAM1 PE=1 SV=2 - [PGAM1_HUMAN]	59.84	5	6	12	98	2.03142e+06	1.28385e+06	0	6.48819e+07	3.88106e+07					0	27.17	4	6					0	12.2	2	2					1.83557	15.75	2	3	213.553	27.95	5	8	20.2652	39.76	7	12	179.385	27.95	5	9	23.1337	44.09
Q14240	Eukaryotic initiation factor 4A-II OS=Homo sapiens GN=EIF4A2 PE=1 SV=2 - [IF4A2_HUMAN]	59.71	8	2	22	119	2.10666e+06	1.05022e+06	1.96086e+06	3.29128e+07	2.23188e+07	129.26	5.9	2	4	12.3649	12.53	4	6	200.87	12.53	4	6	20.1669	23.34	6	9	130.01	9.09	3	5	15.6866	17.69	5	7	152.38	11.3	5	9	18.6414	17.94	8	13	301.748	18.67	7	12	28.8706	27.27
P10606	Cytochrome c oxidase subunit 5B, mitochondrial OS=Homo sapiens GN=COX5B PE=1 SV=2 - [COX5B_HUMAN]	59.69	1	4	9	67	1.71644e+06	2.22383e+06	1.58884e+06	5.01356e+07	4.40678e+07					6.47814	59.69	6	8					10.5488	18.6	2	5					6.33868	18.6	2	5	46.26	9.3	2	4	12.075	24.81	4	10	48.9733	14.73	3	5	15.0033	30.23
C9JTE9	Uncharacterized protein OS=Homo sapiens GN=BCAP29 PE=4 SV=1 - [C9JTE9_HUMAN]	59.57	5	1	12	19	0	512042	4.59752e+06	2.44427e+07	0													1.91742	17.39	4	4					0	4.35	1	2	31	6.52	1	1	3.06356	27.83	4	4	40.84	6.52	1	1	2.88397	6.52
Q5U0E0	Tumor protein D52-like 2 OS=Homo sapiens GN=TPD52L2 PE=2 SV=1 - [Q5U0E0_HUMAN]	59.55	7	5	12	57	1.11164e+06	1.24993e+06	722757	1.89205e+07	1.30015e+07					0	28.18	3	5					2.29042	20	2	2					0	21.82	4	6	121.3	16.36	3	5	16.0758	34.09	5	9	143.444	33.18	6	8	20.391	48.64
F5GX73	Uncharacterized protein OS=Homo sapiens GN=MGST1 PE=4 SV=1 - [F5GX73_HUMAN]	59.52	5	1	1	4	569969	0	52307.2	0	0	106.05	59.52	1	2													80.28	59.52	1	2
P30047	GTP cyclohydrolase 1 feedback regulatory protein OS=Homo sapiens GN=GCHFR PE=1 SV=3 - [GFRP_HUMAN]	59.52	1	1	3	5	0	0	3.82335e+06	0	0																					0	9.52	1	1					1.7278	20.24	1	2
P14618	Pyruvate kinase isozymes M1/M2 OS=Homo sapiens GN=PKM2 PE=1 SV=4 - [KPYM_HUMAN]	59.51	10	4	26	338	2.62942e+06	2.22526e+06	2.88035e+06	4.53109e+07	3.31892e+07	597.643	31.83	11	17	55.3173	36.91	14	22	626.386	29.57	12	22	75.8463	35.97	15	31	567.153	30.89	11	22	75.1967	38.42	14	29	303.863	25.05	10	19	46.8964	37.1	14	27	374.641	22.03	9	18	53.6858	28.63
P06733	Alpha-enolase OS=Homo sapiens GN=ENO1 PE=1 SV=2 - [ENOA_HUMAN]	59.45	15	7	25	367	2.33079e+06	3.21055e+06	2.60133e+06	7.18071e+07	5.28156e+08	346.992	28.34	8	19	57.2791	39.86	13	27	238.392	26.96	8	18	48.2919	36.18	11	26	444.56	23.04	8	19	56.3334	28.8	11	25	338.573	24.88	10	23	47.7631	26.04	11	28	416.204	32.26	11	26	67.8824	36.87
Q06323	Proteasome activator complex subunit 1 OS=Homo sapiens GN=PSME1 PE=1 SV=1 - [PSME1_HUMAN]	59.44	2	11	14	139	1.50953e+06	1.3893e+06	1.2508e+06	44408004	4.56942e+07	107.89	10.04	2	3	10.9933	15.26	3	4	151.47	14.86	3	5	14.7964	31.33	6	8	161.927	22.89	5	8	20.86	35.74	6	9	290.541	34.54	8	14	30.0701	40.56	9	16	266.569	34.54	8	16	35.7924	44.98
Q13404-2	Isoform 2 of Ubiquitin-conjugating enzyme E2 variant 1 OS=Homo sapiens GN=UBE2V1 - [UB2V1_HUMAN]	59.41	7	3	9	24	341962	794556	298848	1.59673e+07	1.88637e+07	24.62	12.35	1	1	4.41641	12.35	1	2					5.07715	24.71	3	4					4.1453	27.06	3	4	51.0511	5.88	1	2	4.39179	17.65	2	3	22.71	5.88	1	1	2.33539	5.88
P10645	Chromogranin-A OS=Homo sapiens GN=CHGA PE=1 SV=7 - [CMGA_HUMAN]	59.3	6	10	25	131	1.08534e+06	0	1.49954e+06	4.71584e+07	4.40868e+07					2.92752	5.03	1	1					0	9.19	3	3	25.47	5.03	1	1	3.09404	10.28	2	2	462.253	36.98	11	23	54.8105	38.51	12	25	426.76	32.82	10	20	45.4716	31.07
P02768	Serum albumin OS=Homo sapiens GN=ALB PE=1 SV=2 - [ALBU_HUMAN]	59.28	8	27	42	891	1.24259e+08	1.35793e+08	1.17909e+08	3.28137e+08	2.89439e+08	1105.4	26.77	19	62	149.646	30.38	21	65	1336.23	25.45	18	61	163.617	26.93	20	68	1151.34	24.3	18	59	159.397	24.3	18	66	704.033	25.45	16	44	109.302	31.36	19	53	720.647	26.77	17	47	112.206	32.68
A8K7Q2	Uncharacterized protein OS=Homo sapiens GN=HSPA8 PE=2 SV=1 - [A8K7Q2_HUMAN]	59.27	3	1	24	281	8.34773e+06	6.95903e+06	6.13526e+06	1.72833e+08	1.56518e+08	241.536	21.71	6	13	32.2027	24.63	7	15	207.65	22.68	8	19	39.0366	25.37	9	20	352.283	22.44	8	19	50.8438	22.44	8	21	277.564	28.29	11	23	46.8886	43.9	16	35	261.084	23.41	10	22	44.6034	32.68
P01598	Ig kappa chain V-I region EU OS=Homo sapiens PE=1 SV=1 - [KV106_HUMAN]	59.26	2	1	3	24	3.50696e+06	859633	846154	1.42496e+08	0	123.363	16.67	1	2	7.8454	16.67	1	3	108.265	16.67	1	2	7.55256	16.67	1	2	67.3811	16.67	1	2	7.31522	16.67	1	2					0	55.56	2	2					0	10.19
P62942	Peptidyl-prolyl cis-trans isomerase FKBP1A OS=Homo sapiens GN=FKBP1A PE=1 SV=2 - [FKB1A_HUMAN]	59.26	3	2	8	27	0	0	0	1.40731e+07	4.91063e+06					0	14.81	1	1					0	14.81	1	1					0	14.81	1	1					0	27.78	3	3					0	32.41
P15531	Nucleoside diphosphate kinase A OS=Homo sapiens GN=NME1 PE=1 SV=1 - [NDKA_HUMAN]	59.21	5	1	8	80	779204	0	781294	1.76168e+07	2.60854e+07	48.61	11.18	1	2	7.15141	11.18	1	2	59.24	11.18	1	2	6.46479	11.18	1	2	74.05	11.18	1	2	6.6934	11.18	1	2	22.33	13.16	2	3	3.87573	25.66	3	4	36.12	23.03	3	4	7.10103	37.5
F5H628	Uncharacterized protein OS=Homo sapiens GN=POSTN PE=4 SV=1 - [F5H628_HUMAN]	59.15	2	1	35	483	5.02805e+06	8.57624e+06	3.19393e+06	2.38022e+08	2.67469e+08	584.108	34.45	17	28	73.8899	42.06	21	35	542.496	29.64	15	28	78.2705	38.45	19	33	518.094	26.17	13	26	68.6606	28.04	14	30	1145.76	38.99	18	47	156.109	40.19	20	58	1087.52	40.45	20	50	143.46	44.73
P09211	Glutathione S-transferase P OS=Homo sapiens GN=GSTP1 PE=1 SV=2 - [GSTP1_HUMAN]	59.05	2	8	8	121	1.03902e+06	829461	755494	3.89543e+07	4.27649e+07	202.677	31.43	4	6	21.3654	31.43	4	7	252.24	41.9	6	9	31.4481	41.9	6	10	262.2	31.43	4	8	28.2917	31.43	4	8	335.205	31.43	4	7	26.96	31.43	4	7	311.784	31.43	4	7	23.8965	34.76
Q5SUL4	Major histocompatibility complex, class I, A OS=Homo sapiens GN=HLA-A PE=3 SV=2 - [Q5SUL4_HUMAN]	59.03	13	3	19	127	4.63985e+06	6.31926e+06	4.81537e+06	5.88596e+07	5.75287e+07	213.62	21.29	6	11	27.7302	20.49	6	12	363.171	21.83	5	12	42.4738	23.45	6	14	323.341	25.88	7	14	37.3061	32.61	8	16	96.57	6.2	2	4	9.36099	13.21	3	5	90.22	12.67	3	6	15.2068	33.15
Q4VC31	Coiled-coil domain-containing protein 58 OS=Homo sapiens GN=CCDC58 PE=1 SV=1 - [CCD58_HUMAN]	59.03	2	1	7	11	0	0	7.49502e+06	3.84684e+06	43607000																					0	10.42	1	1					0	5.56	1	1					0	12.5
P07305	Histone H1.0 OS=Homo sapiens GN=H1F0 PE=1 SV=3 - [H10_HUMAN]	58.76	2	3	14	56	0	645895	512451	6.24854e+07	5.42e+07													0	7.22	1	1					0	16.49	3	3	175.801	20.62	4	8	21.2244	20.62	4	8	165.477	24.23	5	9	20.5159	24.74
O95154	Aflatoxin B1 aldehyde reductase member 3 OS=Homo sapiens GN=AKR7A3 PE=1 SV=2 - [ARK73_HUMAN]	58.61	4	7	16	120	1.72003e+07	2.67567e+07	0	6.82127e+07	4.80613e+07					1.68271	19.94	4	5					0	12.08	2	3					0	3.32	1	1	391.2	30.21	7	15	47.0789	30.21	7	16	313.59	19.64	5	11	32.7989	28.4
P15311	Ezrin OS=Homo sapiens GN=EZR PE=1 SV=4 - [EZRI_HUMAN]	58.53	6	21	46	406	7.29472e+06	2.29809e+07	1.91696e+07	1.78529e+08	1.49326e+08	216.42	15.02	10	19	35.2339	25.09	15	26	156.429	16.38	11	18	27.5854	18.77	12	20	145.18	12.8	7	13	28.5606	15.7	9	18	493.881	29.52	19	37	73.6422	44.03	29	53	418.755	27.13	17	33	60.8478	32.59
A0M8Q6	Ig lambda-7 chain C region OS=Homo sapiens GN=IGLC7 PE=1 SV=2 - [LAC7_HUMAN]	58.49	2	2	5	218	5.26627e+06	6.86357e+06	3.41408e+06	7.44154e+07	6.25749e+07	278.353	32.08	2	15	50.1623	32.08	2	16	189.685	32.08	2	13	40.6254	32.08	2	14	160.975	32.08	2	14	43.5182	32.08	2	15	327.28	41.51	3	16	48.6415	58.49	4	18	324.454	50.94	4	18	52.5481	50.94
P38919	Eukaryotic initiation factor 4A-III OS=Homo sapiens GN=EIF4A3 PE=1 SV=4 - [IF4A3_HUMAN]	58.39	3	7	21	49	0	5.45853e+07	388793	5.7362e+06	6.68697e+06					0	1.95	1	1					1.90974	19.22	5	5					1.90907	10.46	3	3					0	8.52	3	3	21.2	5.84	2	2	5.09799	17.27
E7EUQ8	Pyruvate kinase OS=Homo sapiens GN=PKM2 PE=3 SV=1 - [E7EUQ8_HUMAN]	58.32	7	1	26	260	2.17869e+06	2.05346e+06	2.53534e+06	4.51427e+07	2.96605e+07	394.03	23.87	9	13	42.8669	29.16	12	19	407.687	26.03	11	18	58.6382	32.68	14	27	405.1	22.9	9	17	54.9795	30.72	12	24	108.12	15.26	7	11	33.2775	27.79	11	20	191.471	12.13	6	10	35.26	26.61
D6RG13	Uncharacterized protein OS=Homo sapiens GN=RPS3A PE=3 SV=1 - [D6RG13_HUMAN]	58.3	11	7	18	62	2.60308e+06	3.49062e+06	643559	1.38575e+07	1.88577e+07	80.93	7.62	1	1	3.8763	20.63	3	3	70.88	7.62	1	1	4.37154	28.25	5	5					0	10.31	2	2	104.997	11.21	3	6	8.70317	8.52	2	5	133.338	14.35	3	6	11.2279	20.18
P55084	Trifunctional enzyme subunit beta, mitochondrial OS=Homo sapiens GN=HADHB PE=1 SV=3 - [ECHB_HUMAN]	58.23	7	14	23	178	2.91486e+06	2.82411e+06	2.21114e+06	3.77008e+07	2.78494e+07	270.591	16.46	7	14	42.3611	30.17	11	19	308.201	16.46	7	15	44.3353	16.24	7	16	269.406	14.56	6	11	37.4653	21.1	10	16	86.1172	10.97	5	8	21.0902	32.7	13	17	73.0964	10.55	6	9	14.9563	20.25
P60174	Triosephosphate isomerase OS=Homo sapiens GN=TPI1 PE=1 SV=2 - [TPIS_HUMAN]	58.23	3	10	12	142	0	0	0	5.67471e+07	5.56947e+07					5.66745	5.22	1	3	28.44	5.22	1	2	4.93869	5.22	1	2	23.51	5.22	1	3	6.53206	5.22	1	3	345.62	44.98	9	17	37.9124	42.17	8	15	225.07	44.98	9	18	35.9471	44.98
P50990	T-complex protein 1 subunit theta OS=Homo sapiens GN=CCT8 PE=1 SV=4 - [TCPQ_HUMAN]	58.21	3	20	28	229	2.42192e+06	2.84413e+06	3.01166e+06	2.91179e+07	2.95077e+07	127.872	10.95	5	8	21.1436	14.78	7	11	128.016	12.77	6	8	20.2092	30.84	11	14	87.96	12.77	7	12	20.9148	15.69	7	12	433.879	27.74	12	23	52.4397	34.85	15	28	522.114	22.63	10	21	54.1854	32.12
P17174	Aspartate aminotransferase, cytoplasmic OS=Homo sapiens GN=GOT1 PE=1 SV=3 - [AATC_HUMAN]	58.11	3	15	19	97	0	509465	0	3.21074e+08	2.38249e+07					0	8.96	2	2					0	11.14	2	2									254.633	18.89	6	10	31.1819	29.54	9	17	162.557	21.31	7	11	21.5601	22.76
Q03252	Lamin-B2 OS=Homo sapiens GN=LMNB2 PE=1 SV=3 - [LMNB2_HUMAN]	58	1	23	41	375	9.39416e+06	9.33521e+06	7.40225e+06	2.3988e+07	2.60772e+07	598.557	38.17	21	41	76.5075	39.83	23	47	759.13	35.83	19	39	93.7669	41.33	24	47	518.396	33.67	18	33	72.08	36.33	19	38	134.31	13.17	8	14	16.426	18.67	11	18	86.3329	11.33	7	12	9.96974	20.17
Q9BVA1	Tubulin beta-2B chain OS=Homo sapiens GN=TUBB2B PE=1 SV=1 - [TBB2B_HUMAN]	57.98	6	3	20	377	1.30379e+07	1.38662e+07	8.92527e+06	1.21683e+08	1.04337e+08	611.516	32.58	9	22	86.2751	34.38	10	32	649.959	34.16	10	24	96.0338	36.4	11	31	653.256	34.38	10	24	88.101	39.1	12	34	697.083	46.29	15	42	119.379	51.24	17	44	661.723	46.07	14	39	109.734	48.09
O43396	Thioredoxin-like protein 1 OS=Homo sapiens GN=TXNL1 PE=1 SV=3 - [TXNL1_HUMAN]	57.79	1	2	11	29	0	1.46719e+06	1.30116e+06	1.0302e+07	166489													0	22.15	4	6					0	18.69	2	2					0	6.57	1	1					0	17.99
Q56P42	Pyrin domain-containing protein 2 OS=Homo sapiens GN=PYDC2 PE=1 SV=1 - [PYDC2_HUMAN]	57.73	1	1	2	6	0	0	0	9.24478e+06	6.7025e+06																													0	45.36	1	2					1.9175	57.73
P31150	Rab GDP dissociation inhibitor alpha OS=Homo sapiens GN=GDI1 PE=1 SV=2 - [GDIA_HUMAN]	57.72	2	3	23	80	7.32216e+06	1.31518e+06	3.15066e+06	4.95218e+07	1.30225e+08					1.86562	11.41	4	6					3.5753	9.62	3	4					0	12.3	4	5	75.3	7.61	3	5	12.1471	21.7	8	15	104.94	7.61	3	5	11.1521	13.65
Q16891-2	Isoform 2 of Mitochondrial inner membrane protein OS=Homo sapiens GN=IMMT - [IMMT_HUMAN]	57.7	8	1	43	365	1.38447e+06	3.1964e+06	1.248e+06	1.38118e+08	9.79757e+07	276.61	13.92	6	12	40.9683	21.55	10	17	374.594	20.35	11	18	48.84	24.5	12	20	304.043	15.8	8	15	47.2074	23.56	13	22	562.185	33.47	18	37	78.186	39.09	23	42	380.118	34.81	21	41	74.769	41.23
Q9C010	cAMP-dependent protein kinase inhibitor beta OS=Homo sapiens GN=PKIB PE=2 SV=1 - [IPKB_HUMAN]	57.69	2	1	4	14	4.55018e+06	404328	0	8.14051e+07	1.16644e+07					0	48.72	2	2					2.27723	21.79	1	1					0	21.79	1	1					0	48.72	2	3					0	21.79
Q9BYX7	Putative beta-actin-like protein 3 OS=Homo sapiens GN=POTEKP PE=5 SV=1 - [ACTBM_HUMAN]	57.6	1	1	13	640	1.40614e+08	1.50078e+08	5.54172e+07	2.71904e+09	2.4868e+09	782.081	10.67	3	32	98.595	22.13	5	46	961.436	10.67	3	37	116.284	27.73	7	45	872.918	10.67	3	37	113.786	16.27	5	45	1017.6	10.67	3	42	129.508	31.73	6	51	1139.69	16.53	4	35	105.345	24.53
E9PBX7	Uncharacterized protein OS=Homo sapiens GN=HBG2 PE=3 SV=1 - [E9PBX7_HUMAN]	57.59	6	2	6	78	6.38536e+06	1.30844e+07	1.09657e+07	2.23677e+08	409067538	99.55	18.35	2	5	12.8795	44.3	4	7	104.41	6.33	1	4	9.93301	6.33	1	4	90.02	6.33	1	5	11.3762	6.33	1	5	116.52	18.35	2	7	12.6968	18.35	2	8	123.213	6.33	1	6	12.9633	27.85
P17677	Neuromodulin OS=Homo sapiens GN=GAP43 PE=1 SV=1 - [NEUM_HUMAN]	57.56	2	2	15	23	345290	1.0422e+06	1.11739e+06	4.66233e+07	3.18039e+06					1.67937	5.04	2	2					1.74344	20.59	5	5					0	22.27	4	4					2.11744	13.45	2	2	0	4.62	1	2	3.68741	4.62
Q9Y2Q3	Glutathione S-transferase kappa 1 OS=Homo sapiens GN=GSTK1 PE=1 SV=3 - [GSTK1_HUMAN]	57.52	6	8	11	130	1.22514e+06	1.09801e+06	945102	2.10367e+07	2.01453e+07	101.91	23.89	3	5	14.1239	23.89	3	5	121.44	12.83	2	4	12.0233	31.86	5	7	103	19.91	3	5	14.3451	23.89	4	7	180.218	21.68	4	10	23.8589	21.68	4	11	192.454	28.76	5	11	35.1592	34.07
F8VVL1	Uncharacterized protein OS=Homo sapiens GN=DENR PE=4 SV=1 - [F8VVL1_HUMAN]	57.5	2	1	8	22	4.62514e+06	0	0	6.32507e+07	4.59311e+07					0	38.75	4	5																					0	30.63	4	4					0	13.75
P07148	Fatty acid-binding protein, liver OS=Homo sapiens GN=FABP1 PE=1 SV=1 - [FABPL_HUMAN]	57.48	2	1	4	10	2.98686e+06	1.95955e+06	1.84643e+06	0	11806613					0	11.02	1	2					3.84783	11.02	1	2					2.13387	11.02	1	2													0	16.54
P05455	Lupus La protein OS=Homo sapiens GN=SSB PE=1 SV=2 - [LA_HUMAN]	57.35	6	5	25	54	0	0	1.00535e+06	6.10046e+06	1.10887e+07									26.98	3.43	1	1	3.77158	13.73	5	6	0	6.13	2	2	3.42228	14.22	5	7					3.6287	7.35	3	4					3.90446	11.52
A8MW68	Uncharacterized protein OS=Homo sapiens GN=CAPZA2 PE=4 SV=1 - [A8MW68_HUMAN]	57.34	6	6	11	85	1.98559e+06	2.36365e+06	1.90543e+06	2.19653e+07	1.29181e+07	64.3467	9.44	2	5	15.2471	25.87	5	8	165.438	22.03	4	9	26.7788	27.27	5	10	138.851	15.03	3	7	24.4701	34.27	6	11	72.58	6.29	2	4	7.17132	21.68	5	8	62.34	11.54	3	6	9.70325	11.54
Q03135	Caveolin-1 OS=Homo sapiens GN=CAV1 PE=1 SV=4 - [CAV1_HUMAN]	57.3	5	11	11	197	9.87954e+06	9.71834e+06	7.70547e+06	125739115	1.40487e+08	195.458	39.33	6	13	29.0572	39.33	6	15	206.73	33.71	5	12	22.4614	39.33	6	13	184.378	33.71	5	13	24.6427	39.33	6	14	217.496	52.81	10	20	33.7877	50	9	20	218.348	51.69	10	20	40.6396	48.88
B3KRI2	Uncharacterized protein OS=Homo sapiens GN=NDUFS7 PE=2 SV=1 - [B3KRI2_HUMAN]	57.28	9	4	10	44	785675	9.85684e+06	743988	7.0928e+06	7.14507e+06	73.32	9.22	2	3	5.959	18.45	2	3	68.44	11.17	2	3	7.98139	22.82	3	4	57.56	9.22	2	4	5.0757	6.8	1	2	51.58	16.02	3	4	6.4487	20.87	4	6	34.2668	4.37	1	2	4.51443	18.45
Q5VU80	Ubiquitin associated protein 2-like (Fragment) OS=Homo sapiens GN=UBAP2L PE=2 SV=1 - [Q5VU80_HUMAN]	57.26	10	1	9	18	870382	0	845462	4161778099	3.56654e+06					0	30.77	2	2													0	25.21	2	2					0	22.22	3	3					0	33.76
P38117	Electron transfer flavoprotein subunit beta OS=Homo sapiens GN=ETFB PE=1 SV=3 - [ETFB_HUMAN]	57.25	2	9	13	90	656984	989242	1.04255e+06	15285959	1.45248e+07					4.07269	11.76	2	3					4.06828	11.76	2	2					1.67782	10.59	2	3	39.27	14.12	3	6	14.2514	21.18	4	9	105.1	14.12	3	6	18.6305	29.8
P39019	40S ribosomal protein S19 OS=Homo sapiens GN=RPS19 PE=1 SV=2 - [RS19_HUMAN]	57.24	1	6	10	47	0	0	0	3.4896e+07	2.76525e+07																									110.064	44.83	7	10	17.2696	46.21	7	10	107.176	33.1	5	10	12.7109	28.28
Q14847	LIM and SH3 domain protein 1 OS=Homo sapiens GN=LASP1 PE=1 SV=2 - [LASP1_HUMAN]	57.09	6	5	15	46	267715	9.43601e+06	4.05011e+06	4.3782e+07	1.61569e+07					0	8.43	2	3					1.74841	27.2	4	5					0	27.2	4	7					0	34.48	4	4					5.25621	16.86
P23284	Peptidyl-prolyl cis-trans isomerase B OS=Homo sapiens GN=PPIB PE=1 SV=2 - [PPIB_HUMAN]	56.94	1	10	13	355	8.54766e+06	1.0426e+07	9.26601e+06	7.30774e+07	7.62208e+07	402.892	42.59	9	24	52.2367	50	11	28	431.103	46.3	10	27	56.6372	50.93	11	31	401.01	46.3	10	26	51.5966	50.93	11	28	221.092	43.06	9	18	26.0444	43.06	9	20	173.936	35.19	8	18	24.1218	38.43
Q9UBI6	Guanine nucleotide-binding protein G(I)/G(S)/G(O) subunit gamma-12 OS=Homo sapiens GN=GNG12 PE=1 SV=3 - [GBG12_HUMAN]	56.94	1	1	4	19	0	0	0	2.76515e+07	1.98454e+07																									27.66	30.56	2	3	4.78905	22.22	1	2	36.27	22.22	1	2	4.86002	48.61
P82970	High mobility group nucleosome-binding domain-containing protein 5 OS=Homo sapiens GN=HMGN5 PE=1 SV=1 - [HMGN5_HUMAN]	56.74	5	3	20	91	8.04255e+06	8.96409e+06	7.04993e+06	2.2705e+07	4.77129e+07					7.34395	26.24	7	11					2.17432	12.06	4	6					5.64657	13.83	4	9	19.5	10.99	3	4	12.4431	11.7	7	8					6.92143	27.66
P16188	HLA class I histocompatibility antigen, A-30 alpha chain OS=Homo sapiens GN=HLA-A PE=1 SV=2 - [1A30_HUMAN]	56.71	8	1	16	153	5.33853e+06	6.65247e+06	4.81537e+06	5.88596e+07	5.75287e+07	182.273	23.56	7	13	31.9543	35.62	8	14	297.094	26.58	7	15	49.2699	24.93	6	17	271.308	21.1	6	12	31.2818	35.89	8	16	211.074	14.52	5	10	24.0146	21.64	6	11	194.256	21.1	6	12	27.9465	30.96
Q9Y4L1	Hypoxia up-regulated protein 1 OS=Homo sapiens GN=HYOU1 PE=1 SV=1 - [HYOU1_HUMAN]	56.66	11	30	51	453	4.32196e+06	4.53521e+06	4.77995e+06	1.24108e+08	1.44445e+08	288.21	19.52	13	17	53.6255	25.73	19	31	391.78	20.52	14	23	67.0584	29.93	20	33	313.839	19.82	14	22	65.3381	30.83	22	35	767.174	31.73	21	38	99.8023	40.24	31	53	969.799	26.03	17	32	96.7715	33.43
P36543	V-type proton ATPase subunit E 1 OS=Homo sapiens GN=ATP6V1E1 PE=1 SV=1 - [VATE1_HUMAN]	56.64	5	3	15	41	0	0	0	1.64992e+07	1.53267e+08					0	17.7	2	2																	50.41	13.27	3	4	8.0827	37.61	6	8	117.803	19.91	5	9	10.4676	30.97
A8MZ76	Uncharacterized protein OS=Homo sapiens GN=PSME2 PE=4 SV=1 - [A8MZ76_HUMAN]	56.63	3	12	17	148	1.15109e+06	3.24883e+06	1.09946e+06	3.24478e+07	2.92626e+07	130.79	8.84	2	4	17.8259	28.11	4	7	151.02	11.65	3	5	14.0795	22.49	5	9	113.74	5.62	1	2	7.52774	11.65	3	5	355.209	46.18	10	17	44.3368	48.19	11	23	214.558	46.18	10	16	35.6459	46.59
E7ERB2	Uncharacterized protein OS=Homo sapiens GN=SNRPB PE=4 SV=1 - [E7ERB2_HUMAN]	56.61	6	3	12	28	720235	0	0	7.01806e+06	6.78847e+06					0	30.58	3	5																	63.7849	9.09	3	5	2.3522	21.49	5	7	25.02	5.79	2	3	3.28464	25.21
Q02878	60S ribosomal protein L6 OS=Homo sapiens GN=RPL6 PE=1 SV=3 - [RL6_HUMAN]	56.6	6	11	19	72	0	1.08373e+07	388816	3.06606e+07	2.168e+07													1.80395	7.64	2	2					0	4.86	1	1	79.9364	23.96	7	9	14.825	36.46	11	15	202.383	25	7	12	20.2405	36.46
Q14254	Flotillin-2 OS=Homo sapiens GN=FLOT2 PE=1 SV=2 - [FLOT2_HUMAN]	56.54	3	8	21	59	755568	709717	534418	8.92963e+06	8.53701e+06					0	15.42	3	4	23.33	2.57	1	1	1.87135	6.78	3	4	27.8267	5.14	2	3	5.88308	9.35	3	4	154.64	10.51	4	7	19.7745	22.43	8	12	167.812	14.02	5	8	16.3126	27.57
Q07955	Serine/arginine-rich splicing factor 1 OS=Homo sapiens GN=SRSF1 PE=1 SV=2 - [SRSF1_HUMAN]	56.45	4	8	14	87	1.32828e+06	1.61673e+06	1.24569e+06	2.31045e+07	2.00448e+07	42.5	15.73	4	6	5.43674	15.73	4	8	54.17	16.94	4	6	11.4905	16.94	5	8	134.25	16.94	4	8	18.0737	33.47	6	10	115.01	13.71	3	5	12.2242	24.19	5	8	101.72	16.53	3	7	20.8349	32.26
D6REQ0	Uncharacterized protein OS=Homo sapiens GN=POLR3G PE=4 SV=1 - [D6REQ0_HUMAN]	56.41	1	1	2	13	1.41044e+06	0	0	2.43774e+07	0					0	56.41	2	5					0	33.33	1	2					0	33.33	1	3					0	33.33	1	2
O75964	ATP synthase subunit g, mitochondrial OS=Homo sapiens GN=ATP5L PE=1 SV=3 - [ATP5L_HUMAN]	56.31	2	5	5	47	415979	1.15184e+06	547276	5.77803e+07	5.76871e+07	85.52	23.3	1	2	9.61533	23.3	1	2	38.54	35.92	2	3	6.25303	35.92	2	2					0	11.65	1	1	77.62	24.27	2	4	8.61978	24.27	3	5	39.7833	21.36	2	4	6.51848	21.36
A2A274	Aconitase 2, mitochondrial OS=Homo sapiens GN=ACO2 PE=4 SV=1 - [A2A274_HUMAN]	56.27	5	28	37	414	1.53091e+06	1.94341e+06	1.16129e+06	2.99182e+07	3.87924e+07	272.867	15.4	8	13	36.4599	22.11	11	18	349.312	21.99	12	19	50.0491	21.24	11	18	296.491	18.63	11	20	52.4212	20.5	12	22	365.269	17.76	13	23	50.2387	27.08	16	27	294.844	16.4	12	22	40.7613	19.25
A6NKU3	Uncharacterized protein OS=Homo sapiens GN=GLIPR2 PE=4 SV=2 - [A6NKU3_HUMAN]	56.25	3	3	7	41	1.311e+06	1.17033e+06	955327	5.11517e+06	4.44619e+06	65.09	10.16	1	2	6.30562	10.16	1	2	80.81	10.16	1	2	6.45175	21.88	2	3	40.55	10.16	1	1	3.29973	10.16	1	1	102	14.84	2	3	6.12209	21.88	3	4	74.54	14.84	2	4	5.72916	36.72
D3YLG5	Basigin (Ok blood group), isoform CRA_b OS=Homo sapiens GN=BSG PE=2 SV=1 - [D3YLG5_HUMAN]	56.25	2	1	9	77	209150	0	959276	3.31938e+07	3.04415e+07					1.7095	10.23	1	1					0	19.32	2	2					2.29254	10.23	1	1	164.428	36.93	5	11	24.2036	23.3	3	9	163.228	30.11	4	7	19.329	23.3
Q16890-2	Isoform 2 of Tumor protein D53 OS=Homo sapiens GN=TPD52L1 - [TPD53_HUMAN]	56.25	8	4	10	23	0	2.01043e+06	0	2.18326e+06	5.94287e+06													0	10.42	1	1					0	6.25	1	1	39.1	6.94	1	1	2.27848	14.58	2	4	51.57	6.94	1	2	4.74387	6.94
B4E2V5	Uncharacterized protein OS=Homo sapiens GN=STOM PE=2 SV=1 - [B4E2V5_HUMAN]	56.12	4	9	10	119	2.67181e+06	2.48216e+06	2.17697e+06	3.28683e+07	2.86122e+07	268.623	28.27	5	8	25.5074	36.71	6	9	290.993	24.89	4	7	26.3545	30.8	5	9	268.33	24.89	4	8	31.0544	39.24	6	10	277.221	34.18	6	11	34.3525	34.18	6	11	348.879	46.84	7	14	42.2488	46.84
P68104	Elongation factor 1-alpha 1 OS=Homo sapiens GN=EEF1A1 PE=1 SV=1 - [EF1A1_HUMAN]	56.06	8	18	25	589	1.32238e+07	1.55825e+07	3.05328e+07	3.59935e+08	2.92538e+08	583.55	30.52	13	41	113.32	30.52	13	48	682.231	30.52	13	38	119.147	38.96	14	49	677.626	27.06	11	35	108.033	27.06	11	44	435.717	29.65	14	38	76.0454	36.15	17	46	423.272	42.42	17	48	102.329	54.33
P12429	Annexin A3 OS=Homo sapiens GN=ANXA3 PE=1 SV=3 - [ANXA3_HUMAN]	56.04	5	9	15	84	540183	559801	1.52402e+07	1.84624e+07	1.28862e+07	75.07	9.91	2	2	8.55814	13.93	3	3	82.57	13.93	3	3	8.67878	18.27	4	4	82.88	4.95	1	2	6.93245	11.15	3	5	74.0321	14.86	4	6	8.95327	19.2	6	10	150.349	15.17	4	6	14.5398	22.29
O95994	Anterior gradient protein 2 homolog OS=Homo sapiens GN=AGR2 PE=1 SV=1 - [AGR2_HUMAN]	56	6	8	11	292	1.82525e+07	1.48196e+07	1.06628e+07	2.05603e+07	17880125	455.228	50.29	8	16	48.8239	50.29	9	19	478.65	49.71	7	19	58.967	46.29	6	17	456.41	49.71	7	19	54.152	49.71	7	18	225.184	32	4	7	20.1628	32	4	8	176.473	32	4	8	17.4133	32
Q15907	Ras-related protein Rab-11B OS=Homo sapiens GN=RAB11B PE=1 SV=4 - [RB11B_HUMAN]	55.96	1	2	11	133	1.30349e+06	744966	1.00053e+06	3.31533e+07	2.838e+07	229.605	35.32	6	11	33.544	38.99	7	12	143.637	11.93	2	6	20.6912	11.93	2	6	208.215	17.89	3	8	29.9989	21.56	4	11	288.325	34.4	6	12	35.9898	38.99	7	14	146.36	37.61	7	10	22.0779	34.4
P61088	Ubiquitin-conjugating enzyme E2 N OS=Homo sapiens GN=UBE2N PE=1 SV=1 - [UBE2N_HUMAN]	55.92	6	6	8	51	923144	892483	371947	3.78831e+07	7.08613e+06	24.62	7.24	1	1	2.16886	23.03	3	4					0	15.13	2	3					1.70925	15.79	2	2	55.04	34.21	5	8	15.7751	42.76	7	13					3.82304	11.18
Q9Y333	U6 snRNA-associated Sm-like protein LSm2 OS=Homo sapiens GN=LSM2 PE=1 SV=1 - [LSM2_HUMAN]	55.79	1	1	5	15	0	585943	0	27170149	51712363													0	14.74	2	2					0	7.37	1	2					1.71112	27.37	2	4					0	14.74
P37802	Transgelin-2 OS=Homo sapiens GN=TAGLN2 PE=1 SV=3 - [TAGL2_HUMAN]	55.78	1	6	10	116	234693	1.94184e+06	652574	7.25022e+07	7.56367e+07					0	7.54	1	1	79.03	25.13	4	5	5.87111	14.57	2	3	50.3793	20.6	3	3	6.0247	20.6	3	4	357.025	33.67	5	10	32.4974	42.21	7	13	459.447	33.67	5	10	34.0754	38.69
Q71RB1	PP7080 OS=Homo sapiens PE=2 SV=1 - [Q71RB1_HUMAN]	55.77	2	1	4	7	0	0	0	0	3.6599e+06																													0	8.65	1	2					1.78785	38.46
E9PDK5	Uncharacterized protein OS=Homo sapiens GN=ANXA11 PE=3 SV=1 - [E9PDK5_HUMAN]	55.58	5	13	23	219	2.00471e+06	1.48312e+06	1.20154e+06	7.73168e+07	3.69119e+07	279.853	18.2	6	11	33.2615	20.39	7	15	288.412	20.87	7	13	36.2595	23.06	8	15	273.59	18.2	6	10	30.8202	21.12	7	11	526.521	27.67	11	22	48.3465	30.1	12	24	400.888	25.73	10	18	38.8772	30.58
Q92930	Ras-related protein Rab-8B OS=Homo sapiens GN=RAB8B PE=1 SV=2 - [RAB8B_HUMAN]	55.56	33	3	14	112	2.87247e+06	8.63851e+06	2.05201e+06	2.99755e+08	1.04962e+08	102.117	21.74	4	5	11.1134	32.37	6	8	97.54	21.74	4	7	12.2229	32.37	6	10	130.98	21.74	4	6	12.7758	32.85	6	9	200.877	28.5	5	10	21.0285	37.68	7	14	239.8	37.68	7	13	25.0869	44.44
P21266	Glutathione S-transferase Mu 3 OS=Homo sapiens GN=GSTM3 PE=1 SV=3 - [GSTM3_HUMAN]	55.56	4	4	13	48	976062	1.08478e+06	0	19586516	1.75002e+07					1.89698	12	2	2	26.47	5.78	1	1	2.36575	12	3	3					0	8.44	1	1	175.695	24.44	5	8	23.6205	33.78	7	11	119.821	18.22	4	7	17.8965	28.44
A2A2Q9	Chromosome 20 open reading frame 4 OS=Homo sapiens GN=C20orf4 PE=4 SV=1 - [A2A2Q9_HUMAN]	55.53	1	1	13	17	2.48737e+06	1.32133e+06	0	2.1506e+07	3.71993e+07					0	7.54	2	2					0	4.27	1	1													0	6.78	2	2					0	15.58
P20340	Ras-related protein Rab-6A OS=Homo sapiens GN=RAB6A PE=1 SV=3 - [RAB6A_HUMAN]	55.29	40	5	10	65	2.3322e+06	3.38831e+06	4.00245e+06	7.20658e+07	6.45597e+07	180.917	11.06	2	4	11.4196	11.06	2	4	163.76	14.9	3	5	11.0602	17.31	3	5	79.51	5.29	1	2	4.70605	16.35	2	3	79.8824	10.58	2	6	13.558	20.67	3	7	101.633	17.79	4	10	18.4458	14.9
P15880	40S ribosomal protein S2 OS=Homo sapiens GN=RPS2 PE=1 SV=2 - [RS2_HUMAN]	55.29	5	4	17	52	535078	686360	7.11259e+06	2.84947e+07	2.35915e+07					0	8.53	2	2	33.96	5.8	1	2	2.89917	8.19	2	3					0	22.53	5	7	70.4677	9.9	3	6	8.71399	19.45	6	10	66.7488	9.9	3	6	12.6719	23.55
P18124	60S ribosomal protein L7 OS=Homo sapiens GN=RPL7 PE=1 SV=1 - [RL7_HUMAN]	55.24	4	10	18	82	0	328116	0	6.59922e+07	2.07914e+07					0	3.63	1	1	29.94	4.44	1	1	2.27375	16.13	3	3									121.372	22.98	6	9	18.1662	30.24	8	14	151.008	23.39	7	11	25.2111	35.48
Q15056	Eukaryotic translation initiation factor 4H OS=Homo sapiens GN=EIF4H PE=1 SV=5 - [IF4H_HUMAN]	55.24	2	2	12	31	1.61283e+06	0	1.1037e+06	5.95961e+08	3.76448e+07					0	10.89	2	3					0	9.68	2	2					0	15.73	3	4					0	13.71	4	4					0	19.35
P49748	Very long-chain specific acyl-CoA dehydrogenase, mitochondrial OS=Homo sapiens GN=ACADVL PE=1 SV=1 - [ACADV_HUMAN]	55.11	4	22	34	376	1.8099e+06	1.76687e+06	1.28569e+06	5.76172e+07	5.36232e+07	305.995	14.66	7	12	34.3729	18.47	9	14	317.985	15.57	8	15	39.1371	22.29	11	21	417.074	19.54	9	19	57.7428	28.24	13	25	443.388	33.74	18	34	79.8294	32.98	17	35	508.048	29.62	16	34	80.2875	29.47
P04080	Cystatin-B OS=Homo sapiens GN=CSTB PE=1 SV=2 - [CYTB_HUMAN]	55.1	1	1	3	18	1.49761e+06	863152	601952	0	1.51186e+07					1.92731	42.86	2	4					1.90944	12.24	1	1					0	30.61	1	1													0	12.24
Q9BUR5	Apolipoprotein O OS=Homo sapiens GN=APOO PE=1 SV=1 - [APOO_HUMAN]	55.05	3	6	8	52	0	0	305450	1.07781e+07	1.988e+07																					0	5.56	1	1	126.134	13.64	3	6	8.34402	13.64	3	6	167.51	13.64	3	6	11.4209	32.32
Q15672	Twist-related protein 1 OS=Homo sapiens GN=TWIST1 PE=1 SV=1 - [TWST1_HUMAN]	54.95	1	1	6	13	0	923471	478804	7.55484e+06	2.08329e+07									20.79	14.85	1	1	2.53246	14.85	1	3					0	16.34	1	1					0	31.68	3	3					0	21.78
O43493-2	Isoform TGN46 of Trans-Golgi network integral membrane protein 2 OS=Homo sapiens GN=TGOLN2 - [TGON2_HUMAN]	54.92	8	8	22	87	5.87233e+06	5.80361e+06	3.20247e+06	1.23654e+07	1.23213e+07					1.60253	22.65	5	6					0	6.18	2	3	26.06	2.75	1	2	2.07001	27.69	6	8	58.7033	10.76	3	3	8.28529	19.45	7	9	75.47	6.41	2	5	11.3757	22.65
P61020	Ras-related protein Rab-5B OS=Homo sapiens GN=RAB5B PE=1 SV=1 - [RAB5B_HUMAN]	54.88	11	1	7	64	905058	918787	623761	2.31461e+07	2.36138e+07	55.8733	10.7	2	4	9.17565	25.12	3	5	56.96	10.7	2	4	8.72769	25.12	3	5	43.7753	10.7	2	4	9.28286	10.7	2	4	95.9567	10.7	2	3	8.76646	11.63	3	4	112.006	15.81	3	5	15.5542	39.53
P07585	Decorin OS=Homo sapiens GN=DCN PE=1 SV=1 - [PGS2_HUMAN]	54.87	9	9	21	319	1.79981e+07	2.16934e+07	1.79476e+07	3.37563e+08	2.95466e+08	279.9	20.06	7	26	53.0357	20.06	7	25	273.887	20.33	8	25	44.2445	33.43	13	28	195.615	23.96	9	25	45.763	27.02	10	25	313.45	24.51	9	24	57.1344	40.39	12	32	365.635	26.46	10	32	60.57	33.7
P55327-3	Isoform 3 of Tumor protein D52 OS=Homo sapiens GN=TPD52 - [TPD52_HUMAN]	54.84	11	6	17	55	1.39691e+06	0	216449	5.69036e+07	3.12428e+07	104.209	18.15	2	2	5.50952	18.15	2	2					0	7.66	1	1	54.08	6.05	1	2	7.64612	6.05	1	2	152.33	21.37	3	5	9.60927	26.21	4	6	165.025	22.58	3	4	12.1281	40.73
B7Z4X2	Uncharacterized protein OS=Homo sapiens GN=LTF PE=2 SV=1 - [B7Z4X2_HUMAN]	54.8	7	12	26	112	3.66091e+06	3.56853e+06	1.42251e+06	7.91037e+06	8.15699e+06	262.816	11.56	5	8	29.51	25.83	10	14	168.57	6.46	3	5	17.7773	11.71	5	8	264.546	11.86	6	8	28.1875	16.82	8	10	237	8.11	4	9	27.4433	15.02	6	11	142.547	6.76	4	7	18.4727	9.61
Q71U36	Tubulin alpha-1A chain OS=Homo sapiens GN=TUBA1A PE=1 SV=1 - [TBA1A_HUMAN]	54.77	20	5	19	496	1.4349e+07	1.18763e+07	1.02513e+07	2.58496e+08	2.6298e+08	808.108	37.92	12	33	106.634	43.02	14	38	833.996	37.92	12	33	107.555	37.92	12	35	719.599	41.24	13	31	96.7445	49.67	15	37	684.584	39.47	14	44	116.642	39.47	14	49	616.52	44.12	15	40	113.489	44.12
P24539	ATP synthase subunit b, mitochondrial OS=Homo sapiens GN=ATP5F1 PE=1 SV=2 - [AT5F1_HUMAN]	54.69	2	11	15	211	2.29253e+06	2.30791e+06	3.19933e+06	9.0674e+07	7.698e+07	188.883	15.23	3	7	28.6795	22.66	5	13	223.773	19.53	4	7	20.4723	25	6	11	133.53	18.36	4	6	22.4532	22.66	5	9	275.7	31.25	7	14	41.9984	41.41	9	22	271.845	35.94	8	17	52.9404	36.33
Q96C19	EF-hand domain-containing protein D2 OS=Homo sapiens GN=EFHD2 PE=1 SV=1 - [EFHD2_HUMAN]	54.58	5	4	20	70	1.43527e+06	433205	1.71852e+06	2.19901e+07	2.06006e+07	23.19	7.08	2	3	0	15	3	3					2.16842	21.25	7	8	27.02	5.83	2	3	1.60704	11.67	4	5	52.41	12.92	4	7	5.32216	9.58	3	6	86.7215	19.17	5	8	8.42824	22.92
Q9UI09	NADH dehydrogenase [ubiquinone] 1 alpha subcomplex subunit 12 OS=Homo sapiens GN=NDUFA12 PE=1 SV=1 - [NDUAC_HUMAN]	54.48	4	6	8	55	0	0	683041	9.05071e+06	8.44068e+06																					1.79069	12.41	2	3	32.81	32.41	3	4	5.73232	41.38	4	5	50.4567	32.41	3	6	12.6894	32.41
P28331	NADH-ubiquinone oxidoreductase 75 kDa subunit, mitochondrial OS=Homo sapiens GN=NDUFS1 PE=1 SV=3 - [NDUS1_HUMAN]	54.2	7	20	28	214	1.18102e+06	813373	771515	2.85253e+07	2.29823e+07	92.81	6.88	3	5	11.1041	18.43	7	10	73.8814	9.77	5	6	15.2864	20.5	9	11	182.389	8.12	4	7	19.034	17.61	8	11	250.217	21.87	13	20	40.4105	24.07	14	24	224.063	22.97	13	22	50.1202	24.76
Q7Z7H5	Transmembrane emp24 domain-containing protein 4 OS=Homo sapiens GN=TMED4 PE=1 SV=1 - [TMED4_HUMAN]	54.19	5	4	10	74	3.06024e+06	3.33315e+06	1.56748e+06	2.1356e+07	82648617	47.2793	14.54	3	6	2.91893	14.54	3	5	39.1916	14.54	3	4	6.43214	14.54	3	6	40.7227	5.73	2	4	0	32.16	5	7	22.81	6.61	2	3	1.82423	11.01	3	4	34.07	2.64	1	2	0	8.81
Q9UIJ7	GTP:AMP phosphotransferase, mitochondrial OS=Homo sapiens GN=AK3 PE=1 SV=4 - [KAD3_HUMAN]	54.19	3	8	10	71	0	0	364235	1.64222e+07	1.83623e+07													0	5.29	1	1					6.28003	13.66	2	3	74.47	14.54	3	5	8.00118	25.11	5	8	114.84	17.62	3	5	14.7998	25.11
P62491	Ras-related protein Rab-11A OS=Homo sapiens GN=RAB11A PE=1 SV=3 - [RB11A_HUMAN]	54.17	1	1	10	113	1.30349e+06	744966	1.00053e+06	3.0886e+07	2.53778e+07	190.536	25.93	5	10	29.1013	25.93	5	10	143.637	12.04	2	6	20.6912	12.04	2	6	208.215	18.06	3	8	29.9989	21.76	4	11	85.43	21.3	4	8	20.4686	25.93	5	10	37.3167	24.54	5	7	12.5622	21.3
F8W0V9	Uncharacterized protein OS=Homo sapiens GN=CEP290 PE=4 SV=1 - [F8W0V9_HUMAN]	54.17	1	1	8	13	3.0863e+06	0	2.39002e+06	0	8.75309e+06					0	20.83	3	3					1.68423	7.29	1	2					0	11.46	1	1													1.76858	43.75
Q9Y490	Talin-1 OS=Homo sapiens GN=TLN1 PE=1 SV=3 - [TLN1_HUMAN]	54.15	3	69	112	1273	3.47882e+07	1.05164e+07	4.22985e+07	3.98259e+08	3.01739e+08	1375.4	21.92	39	71	203.625	26.6	49	83	1800.98	20.82	39	77	227.797	27.08	49	92	1938.46	24.16	43	85	242.462	27.78	51	101	2781.98	27.78	52	112	321.397	32.7	58	125	2930.39	31.33	59	120	341.211	33.53
P05413	Fatty acid-binding protein, heart OS=Homo sapiens GN=FABP3 PE=1 SV=4 - [FABPH_HUMAN]	54.14	1	3	6	19	0	3.11222e+07	5.55214e+07	4.20987e+07	3.72971e+08													0	18.8	2	2					0	7.52	1	1					0	7.52	1	1					0	7.52
O75955	Flotillin-1 OS=Homo sapiens GN=FLOT1 PE=1 SV=3 - [FLOT1_HUMAN]	54.1	10	9	23	53	2.05001e+06	365560	1.33095e+06	1.57397e+07	1.87384e+07	107.953	10.07	3	4	11.7354	13.58	5	6	46.58	3.04	1	2	7.73056	8.9	4	5	127.89	11.94	4	7	15.9207	18.74	8	11	26.41	7.96	3	3	2.89952	16.16	7	7					0	14.75
Q32MZ9	POLD3 protein OS=Homo sapiens GN=POLD3 PE=2 SV=1 - [Q32MZ9_HUMAN]	54.1	5	1	15	37	1.13253e+06	1717946	2.18412e+06	6.95601e+07	6.9511e+07					5.23753	13.58	4	5					1.88919	22.48	4	5					3.93783	8.2	3	5					0	12.88	4	9					1.7763	7.96
Q9UJ72	Annexin A10 OS=Homo sapiens GN=ANXA10 PE=1 SV=3 - [ANX10_HUMAN]	54.01	2	7	14	60	278406	660614	323907	3.39449e+07	3.00843e+07	0	5.86	2	3	5.39194	10.49	3	4					0	9.57	2	4					0	16.67	3	5	87.92	12.65	5	8	12.3265	26.85	5	7	107.79	16.67	6	10	13.9972	16.05
B4DQI8	Uncharacterized protein OS=Homo sapiens GN=RAP1B PE=2 SV=1 - [B4DQI8_HUMAN]	53.94	22	2	9	178	7.54272e+06	7.60606e+06	6.60743e+06	5.98463e+07	5.22493e+07	286.303	43.03	7	13	28.6902	49.7	8	14	275.477	43.03	7	13	34.4566	47.27	8	13	344.622	43.03	6	14	35.9712	43.03	6	14	289.621	43.03	6	13	37.7671	47.27	7	16	445.732	43.03	6	14	41.334	47.27
P80303	Nucleobindin-2 OS=Homo sapiens GN=NUCB2 PE=1 SV=2 - [NUCB2_HUMAN]	53.81	8	8	23	68	625050	1.80051e+06	462562	4.78052e+06	1.29849e+07	32.74	2.62	1	1	2.36344	5.71	2	2					1.62079	10	3	4	31.01	2.62	1	1	2.11397	10	4	5					0	9.52	3	3	28.33	3.57	2	3	4.0358	16.19
P16190	HLA class I histocompatibility antigen, A-33 alpha chain OS=Homo sapiens GN=HLA-A PE=1 SV=3 - [1A33_HUMAN]	53.7	3	3	18	191	5.95404e+06	7.04773e+06	5.15662e+06	5.64501e+07	6.17306e+07	173.024	20	6	12	30.4109	26.58	7	14	275.4	26.58	8	16	42.3333	28.49	8	17	254.768	20.27	6	11	29.8796	22.19	6	13	424.996	24.38	8	20	56.19	26.03	7	18	395.978	29.32	9	21	51.0974	37.26
P51148	Ras-related protein Rab-5C OS=Homo sapiens GN=RAB5C PE=1 SV=2 - [RAB5C_HUMAN]	53.7	12	5	9	144	1.64256e+06	1.23055e+06	1.42589e+06	3.12394e+07	2.79757e+07	297.623	31.48	5	9	28.0397	39.81	6	11	223.69	25.93	4	8	28.3739	36.57	5	10	249.406	31.48	5	8	25.0145	42.13	6	10	199.778	22.69	4	9	26.6569	33.33	6	11	290.538	34.26	6	13	36.0853	34.26
C9J0K6	Uncharacterized protein OS=Homo sapiens GN=SRI PE=4 SV=1 - [C9J0K6_HUMAN]	53.55	5	6	9	62	0	189494	1.51683e+06	3.25235e+07	9.94943e+07													0	14.19	1	1					0	7.1	1	1	68.3413	38.71	6	11	17.4306	41.94	6	13	55.1433	38.71	6	11	17.4373	53.55
P62873	Guanine nucleotide-binding protein G(I)/G(S)/G(T) subunit beta-1 OS=Homo sapiens GN=GNB1 PE=1 SV=3 - [GBB1_HUMAN]	53.53	13	3	14	119	6.20219e+06	6.49807e+06	5.37896e+06	8.4851e+07	85111086	86.1172	12.06	5	11	16.197	10	4	8	135.422	18.82	6	11	16.058	16.18	6	10	133.315	12.06	5	10	15.9953	22.35	5	9	127.685	16.47	6	11	18.1905	21.18	6	13	124.16	16.47	6	14	20.185	32.35
P09429	High mobility group protein B1 OS=Homo sapiens GN=HMGB1 PE=1 SV=3 - [HMGB1_HUMAN]	53.49	6	4	17	132	2.42978e+06	3.25873e+06	2.55529e+06	3.80437e+07	3.9027e+07	40.2467	11.63	3	5	11.8621	16.74	4	7	80.46	11.63	3	7	15.5653	20	4	8	57.0692	15.35	4	10	19.8601	32.09	7	12	67.92	14.88	4	7	11.6345	13.02	3	6	134.04	29.77	8	15	19.5563	26.51
P30519	Heme oxygenase 2 OS=Homo sapiens GN=HMOX2 PE=1 SV=2 - [HMOX2_HUMAN]	53.48	1	3	15	35	523126	0	1.94366e+06	8.65243e+06	4.94328e+06					3.55012	6.96	3	3													0	13.61	3	4	29.26	5.06	2	4	3.65373	22.15	5	6	32.63	2.85	1	2	3.40919	7.59
Q16718	NADH dehydrogenase [ubiquinone] 1 alpha subcomplex subunit 5 OS=Homo sapiens GN=NDUFA5 PE=1 SV=3 - [NDUA5_HUMAN]	53.45	4	6	7	64	0	0	421262	5.55229e+06	7.93161e+06									35.86	22.41	1	1	3.99211	22.41	1	1					2.76583	30.17	2	2	103.6	43.97	3	5	13.2104	44.83	4	6	83.9433	43.97	3	6	15.9497	43.97
P35221	Catenin alpha-1 OS=Homo sapiens GN=CTNNA1 PE=1 SV=1 - [CTNA1_HUMAN]	53.42	36	23	44	215	1.60817e+06	2.06471e+06	6.61647e+06	2.31186e+08	3.7208e+07	31.36	5.19	4	4	4.63593	7.95	5	6	57.86	4.08	3	3	8.51187	12.8	7	8	90.17	5.52	4	5	11.2593	9.27	6	7	274.024	20.53	14	21	42.1363	32.12	21	32	286.531	21.52	15	23	49.9864	29.8
P28070	Proteasome subunit beta type-4 OS=Homo sapiens GN=PSMB4 PE=1 SV=4 - [PSB4_HUMAN]	53.41	1	4	8	29	0	0	0	8.32607e+06	5.30204e+06					0	16.29	2	2													0	12.12	1	1	48.44	8.33	1	2	9.35951	20.83	4	5	55.69	14.02	2	4	9.93097	20.83
O15145	Actin-related protein 2/3 complex subunit 3 OS=Homo sapiens GN=ARPC3 PE=1 SV=3 - [ARPC3_HUMAN]	53.37	4	3	9	62	0	947325	656875	1.07759e+07	8.82586e+06	32.63	7.3	1	1	2.26954	7.3	1	1	57.0333	17.42	3	7	11.6018	21.35	3	6	39.16	13.48	2	4	9.8609	26.97	4	6	132.92	13.48	2	4	13.3458	20.22	3	5	143.4	13.48	2	4	13.6471	16.85
P51858	Hepatoma-derived growth factor OS=Homo sapiens GN=HDGF PE=1 SV=1 - [HDGF_HUMAN]	53.33	5	5	12	77	0	711710	938932	2.06118e+07	1.65532e+07					7.34532	15.42	2	3	53.87	15.42	2	2	5.50627	15.42	2	3					0	7.5	2	2	60.34	15	3	6	10.1736	22.92	5	9	48.11	15	3	6	9.13759	26.25
P51884	Lumican OS=Homo sapiens GN=LUM PE=1 SV=2 - [LUM_HUMAN]	53.25	1	11	16	375	2.2803e+07	2.24903e+07	1.44761e+07	6.6343e+08	5.71377e+08	495.029	33.43	11	28	75.8705	37.87	13	28	504.95	33.43	10	27	72.7437	30.77	9	26	499.577	33.14	10	27	72.5602	30.47	9	26	540.802	27.81	10	32	69.4107	28.11	9	34	495.196	28.99	9	30	64.1981	44.08
Q04917	14-3-3 protein eta OS=Homo sapiens GN=YWHAH PE=1 SV=4 - [1433F_HUMAN]	53.25	6	5	15	158	7.36381e+06	7.64796e+06	7.17203e+06	1.73727e+08	3.38741e+08	96.8951	17.48	5	8	15.3538	26.83	7	10	119.987	20.73	5	9	18.1902	23.98	6	11	67.296	18.29	5	6	13.5118	21.95	6	8	173.608	26.02	7	14	28.9743	32.52	9	17	177.697	22.36	6	14	29.7128	27.64
P60842	Eukaryotic initiation factor 4A-I OS=Homo sapiens GN=EIF4A1 PE=1 SV=1 - [IF4A1_HUMAN]	53.2	6	5	21	126	2.10666e+06	896599	680254	1.89803e+07	2.23188e+07	129.26	5.91	2	4	12.3649	12.56	4	6	200.87	12.56	4	6	20.1669	17.73	5	7	130.01	9.11	3	5	15.6866	9.11	3	5	193.041	20.94	8	13	27.9546	24.63	10	16	361.788	28.33	10	16	40.9024	33.25
B4DYV9	Uncharacterized protein OS=Homo sapiens GN=STK35 PE=2 SV=1 - [B4DYV9_HUMAN]	53.09	2	1	6	37	7.65131e+07	8.21469e+07	7.8845e+07	1.02258e+08	4.01553e+07	0	4.32	1	4					0	4.32	1	6	0	4.32	1	2	0	4.32	1	3	0	4.32	1	1	0	4.32	1	2	0	17.28	2	2					0	21.6
P61981	14-3-3 protein gamma OS=Homo sapiens GN=YWHAG PE=1 SV=2 - [1433G_HUMAN]	53.04	5	6	15	237	7.19402e+06	7.64796e+06	7.17203e+06	1.73727e+08	1.64389e+08	201.434	26.72	7	13	27.9861	26.72	7	13	191.697	31.17	7	12	28.3197	34.41	8	15	180.857	34.41	8	12	30.1275	34.41	8	14	334.925	33.2	9	20	45.6039	34.01	10	22	355.656	30.77	8	21	51.0568	33.2
O75489	NADH dehydrogenase [ubiquinone] iron-sulfur protein 3, mitochondrial OS=Homo sapiens GN=NDUFS3 PE=1 SV=1 - [NDUS3_HUMAN]	53.03	4	7	14	81	0	1.60542e+06	814590	1.45612e+07	8.38252e+06					1.65246	17.42	3	3	48.91	15.53	3	3	8.74541	28.03	7	7	73.22	4.92	1	2	6.00398	4.92	1	2	149.71	21.21	4	7	17.5889	25.76	5	8	132.577	16.29	3	5	14.6159	16.29
P05091	Aldehyde dehydrogenase, mitochondrial OS=Homo sapiens GN=ALDH2 PE=1 SV=2 - [ALDH2_HUMAN]	53	5	14	22	254	2.85215e+06	3.06414e+06	2.07474e+06	6.49621e+07	6.57895e+07	536.688	29.21	10	20	59.8019	29.21	10	21	360.773	28.24	10	16	40.7415	28.24	10	19	492.962	30.95	11	20	49.6671	31.33	12	24	163.319	23.21	9	15	28.4448	21.28	8	16	120.74	18.18	7	16	29.4468	29.01
Q9H223	EH domain-containing protein 4 OS=Homo sapiens GN=EHD4 PE=1 SV=1 - [EHD4_HUMAN]	52.87	1	13	26	113	0	0	3.59208e+06	4.28139e+07	3.16544e+07													0	6.84	2	2					0	1.29	1	1	490.4	25.88	12	20	42.9451	39.19	18	27	476.06	18.85	9	18	43.1127	30.68
P01834	Ig kappa chain C region OS=Homo sapiens GN=IGKC PE=1 SV=1 - [IGKC_HUMAN]	52.83	1	4	5	308	4.20067e+07	3.29447e+07	2.53111e+07	1.87789e+08	1.85949e+08	793.227	49.06	3	16	71.6826	49.06	3	21	857.867	49.06	3	23	99.3607	49.06	3	26	882.804	49.06	4	23	96.6447	49.06	4	28	594.167	49.06	3	18	72.3124	49.06	3	24	721.921	49.06	3	19	77.379	49.06
B4DT43	Uncharacterized protein OS=Homo sapiens GN=ETFA PE=2 SV=1 - [B4DT43_HUMAN]	52.82	2	7	13	111	1.56159e+06	1.6008e+06	634776	1.44343e+07	7.98733e+06	114.18	19.72	4	6	17.4995	17.61	3	6	118.53	23.24	4	6	17.75	28.87	5	8	33.55	18.31	4	7	14.5814	22.54	4	7	48.61	15.14	3	3	9.90987	20.42	4	5	150.221	22.54	4	6	20.6067	26.06
F8W7Q4	Uncharacterized protein OS=Homo sapiens GN=FAM162A PE=4 SV=1 - [F8W7Q4_HUMAN]	52.78	3	4	7	55	961683	789677	889531	1.29262e+07	1.60537e+07	35.77	7.64	1	2	6.54965	19.44	2	3	28.9	7.64	1	2	6.8604	19.44	2	3	47.71	19.44	2	4	10.369	19.44	2	4	27.37	11.81	1	1	2.99596	15.97	2	3	72.84	11.81	1	2	5.55217	35.42
P18859	ATP synthase-coupling factor 6, mitochondrial OS=Homo sapiens GN=ATP5J PE=1 SV=1 - [ATP5J_HUMAN]	52.78	2	3	5	62	741397	727465	636175	1.76892e+07	1.8989e+07	44.98	17.59	1	1	3.96964	17.59	1	1	107	25.93	2	5	15.2453	25.93	2	5	111.55	25.93	2	3	6.48601	17.59	1	2	187.273	46.3	4	6	14.4555	46.3	4	7	178.537	25.93	2	3	10.7536	25.93
Q16181-2	Isoform 2 of Septin-7 OS=Homo sapiens GN=SEPT7 - [SEPT7_HUMAN]	52.75	24	9	24	85	911823	848014	1.13041e+06	6.50596e+06	2.54988e+07	76.5918	7.57	4	6	11.1145	9.86	6	10	43.5067	12.39	4	6	11.0668	12.39	4	6					2.54726	9.86	3	3	37.46	5.28	2	3	4.93025	13.3	5	7	85.0256	5.28	2	4	7.98293	20.64
P45880-2	Isoform 2 of Voltage-dependent anion-selective channel protein 2 OS=Homo sapiens GN=VDAC2 - [VDAC2_HUMAN]	52.65	7	8	12	222	4.66959e+06	5.22554e+06	3.6956e+06	7.06627e+07	6.04257e+07	295.044	26.86	5	15	46.8394	26.86	5	15	303.683	29.68	6	16	43.431	36.75	7	17	355.903	30.39	6	16	47.6186	33.22	7	17	294.099	33.22	7	18	37.886	42.05	8	20	390.958	33.22	7	19	45.4588	33.22
P04233-2	Isoform 2 of HLA class II histocompatibility antigen gamma chain OS=Homo sapiens GN=CD74 - [HG2A_HUMAN]	52.59	7	7	12	127	1.28948e+06	2.12717e+06	1.64435e+06	4.67641e+07	4.38944e+07	114.693	22.84	4	6	19.2232	27.59	5	8	200.926	28.45	5	8	22.5319	28.45	5	9	190.405	33.19	6	12	30.4286	33.19	6	12	237.916	21.55	4	10	28.3292	31.9	6	13	202.824	21.55	4	8	20.672	43.53
A9R9N7	Major histocompatibility complex, class I, A OS=Homo sapiens GN=HLA-A PE=3 SV=1 - [A9R9N7_HUMAN]	52.56	9	2	17	166	3.8547e+06	7.52857e+06	4.09527e+06	4.73623e+07	5.80709e+07	161.142	17.79	5	11	30.3999	17.79	5	12	234.529	12.67	3	9	32.8264	25.34	6	15	201.51	11.86	3	7	23.7134	15.36	4	11	497.268	19.68	6	19	61.0208	19.68	6	19	398.649	26.15	7	20	54.3731	28.84
Q7Z7J9	Calcium/calmodulin-dependent protein kinase II inhibitor 1 OS=Homo sapiens GN=CAMK2N1 PE=2 SV=1 - [CK2N1_HUMAN]	52.56	2	1	4	8	0	0	0	0	0													0	34.62	2	2
P58546	Myotrophin OS=Homo sapiens GN=MTPN PE=1 SV=2 - [MTPN_HUMAN]	52.54	2	1	5	10	0	0	0	0	0													0	16.1	1	1					0	10.17	1	1
O75208	Ubiquinone biosynthesis protein COQ9, mitochondrial OS=Homo sapiens GN=COQ9 PE=1 SV=1 - [COQ9_HUMAN]	52.52	2	4	12	34	416247	0	0	1.3632e+07	3.928e+07					0	11.64	2	2					0	2.83	1	1					0	8.49	1	1	33.7027	6.6	1	2	5.0501	15.41	3	4					0	7.55
P13796	Plastin-2 OS=Homo sapiens GN=LCP1 PE=1 SV=6 - [PLSL_HUMAN]	52.47	2	10	32	289	2.62844e+06	2.86282e+06	1.19759e+06	4.70484e+07	4.77038e+07	242.491	12.44	5	10	32.2762	19.46	9	18	252.074	13.4	6	11	31.0539	24.72	10	15	250.887	15.63	6	13	34.8543	15.79	7	16	936.206	30.14	15	35	102.779	38.76	19	40	710.385	29.19	16	33	82.8563	30.62
Q9Y673	Dolichyl-phosphate beta-glucosyltransferase OS=Homo sapiens GN=ALG5 PE=1 SV=1 - [ALG5_HUMAN]	52.47	3	9	16	95	621262	0	830044	1.51174e+07	1.42516e+07	158.96	10.19	2	4	16.5612	17.59	3	6	124.257	10.19	2	3	11.6674	10.19	2	4	117.92	13.58	3	5	16.4997	25.62	6	9	47.9667	14.51	5	6	6.69226	20.37	7	12	62.27	17.59	5	5	10.3512	25.31
P30505	HLA class I histocompatibility antigen, Cw-8 alpha chain OS=Homo sapiens GN=HLA-C PE=2 SV=1 - [1C08_HUMAN]	52.46	14	0	15	122	5.59815e+06	6.65247e+06	4.711e+06	9.54836e+07	7.60853e+07	118.069	17.21	5	9	17.8589	28.14	7	11	160.223	15.57	4	7	20.4567	19.67	5	8	113.12	16.12	5	9	16.2784	14.48	4	8	238.497	14.48	4	12	37.4533	14.48	4	12	197.273	17.21	4	12	37.8668	29.78
A8MUB1	Tubulin, alpha 1 (Testis specific), isoform CRA_a OS=Homo sapiens GN=TUBA4A PE=2 SV=1 - [A8MUB1_HUMAN]	52.42	12	3	16	397	1.4349e+07	1.18763e+07	8.60216e+06	2.20992e+08	2.30421e+08	669.235	32.79	10	29	91.8003	32.79	10	31	578.749	32.79	10	26	82.8309	32.79	10	28	501.527	32.79	10	23	71.8925	44.11	12	29	615.736	37.64	13	38	102.107	37.64	13	43	517.854	36.95	12	30	90.7507	36.95
P31689	DnaJ homolog subfamily A member 1 OS=Homo sapiens GN=DNAJA1 PE=1 SV=2 - [DNJA1_HUMAN]	52.39	3	2	15	49	658783	1.06252e+06	887759	4.61659e+07	4.6764e+07					3.84275	14.86	5	5					7.80146	13.85	4	7					1.75485	16.62	4	4					6.05931	21.16	6	8					3.79469	9.07
Q9UDW1	Cytochrome b-c1 complex subunit 9 OS=Homo sapiens GN=UQCR10 PE=1 SV=3 - [QCR9_HUMAN]	52.38	4	2	3	23	0	0	0	7.4208e+06	8.87577e+07																									52.9758	11.11	1	2	4.42375	11.11	1	2	46.7325	11.11	1	2	3.53052	25.4
P08590	Myosin light chain 3 OS=Homo sapiens GN=MYL3 PE=1 SV=3 - [MYL3_HUMAN]	52.31	3	1	12	58	3.06164e+06	3.37337e+06	3.06407e+06	6.04006e+07	92863173	69.3467	10.26	2	6	10.336	13.85	2	5	65.84	9.23	2	4	5.21543	10.26	2	4					1.78225	18.97	3	4	77.11	8.21	2	2	5.97648	15.9	3	4	132.01	8.21	2	4	12.3145	28.21
P01623	Ig kappa chain V-III region WOL OS=Homo sapiens PE=1 SV=1 - [KV305_HUMAN]	52.29	7	2	5	72	1.26733e+06	4.2971e+06	292620	2.08052e+07	1.97045e+07	114.615	22.94	2	3	10.2575	31.19	2	4	140.646	44.04	4	7	12.434	44.04	4	7	103.747	22.94	2	4	14.4017	37.61	3	8	193.502	37.61	3	6	14.977	37.61	3	6	75.7705	37.61	3	5	10.6064	45.87
Q06830	Peroxiredoxin-1 OS=Homo sapiens GN=PRDX1 PE=1 SV=1 - [PRDX1_HUMAN]	52.26	1	8	13	252	3.57449e+06	3.42859e+06	2.98625e+06	1.64815e+08	1.47987e+08	133.87	32.66	6	11	20.8691	35.68	7	14	191.804	29.15	5	10	25.4889	36.18	8	14	198.712	29.15	5	10	25.2806	35.68	7	13	311.656	49.25	10	22	47.4007	51.26	11	31	346.779	45.73	9	18	42.5591	47.74
Q16695	Histone H3.1t OS=Homo sapiens GN=HIST3H3 PE=1 SV=3 - [H31T_HUMAN]	52.21	6	1	11	177	1.73101e+07	1.96059e+07	1.73657e+07	1.27959e+08	1.20041e+08	47.2184	30.88	7	17	11.5575	26.47	5	14	43.318	26.47	5	14	15.8374	30.88	6	19	64.5883	30.88	6	18	18.4166	36.03	8	17	49.5976	26.47	5	12	14.0258	42.65	8	14	27.65	21.32	4	7	5.39529	26.47
P26583	High mobility group protein B2 OS=Homo sapiens GN=HMGB2 PE=1 SV=2 - [HMGB2_HUMAN]	52.15	2	2	16	58	0	721206	8.30275e+06	4.81438e+07	7.41261e+06					2.16418	19.14	3	4	21.38	6.22	1	1	4.198	21.53	4	4	26.21	6.22	1	4	6.33931	21.05	4	8	44.35	6.22	1	2	6.62645	22.49	4	7	22.17	9.09	2	4	4.33713	14.35
E9PK06	Uncharacterized protein OS=Homo sapiens GN=EEF1D PE=4 SV=1 - [E9PK06_HUMAN]	52.14	5	1	9	71	5.31187e+06	5.40217e+06	4.72213e+06	8.77966e+07	1.81493e+07	46.0033	13.57	2	3	2.19567	23.57	3	7	39.9367	13.57	2	3	3.38932	23.57	3	9	46.3153	13.57	2	4	4.31808	35	4	9	84.56	25.71	4	5	5.219	28.57	4	6	54.0925	18.57	3	5	5.24306	35.71
D6RDM7	Uncharacterized protein OS=Homo sapiens GN=UBE2K PE=4 SV=1 - [D6RDM7_HUMAN]	52.03	4	1	5	6	0	0	0	0	3.87738e+07																																					0	28.46
O14737	Programmed cell death protein 5 OS=Homo sapiens GN=PDCD5 PE=1 SV=3 - [PDCD5_HUMAN]	52	3	1	6	15	0	0	3.36901e+06	0	0					0	10.4	1	1					0	28	2	2					0	5.6	1	2
P00367	Glutamate dehydrogenase 1, mitochondrial OS=Homo sapiens GN=GLUD1 PE=1 SV=2 - [DHE3_HUMAN]	51.97	6	17	30	267	1.99477e+06	2.54513e+06	1.14452e+06	1.97756e+07	1.56704e+07	258.809	20.97	10	20	42.5851	27.78	13	24	367.382	28.49	14	25	40.5045	28.67	13	27	289.443	17.56	7	16	40.5173	28.14	11	21	102.51	11.83	6	8	16.104	16.13	8	14	162.417	17.03	8	12	17.772	16.85
D6RD17	Uncharacterized protein OS=Homo sapiens GN=IGJ PE=4 SV=1 - [D6RD17_HUMAN]	51.9	4	3	6	76	5.29826e+06	5.35283e+06	4.77296e+06	9.2279e+07	8.19025e+07	96.57	17.09	3	6	12.4209	17.09	3	8	70.2368	12.03	2	4	9.97582	17.09	3	6	41.47	17.09	3	6	11.4382	22.78	4	8	147.357	17.09	3	8	14.1215	46.2	5	11	107.136	17.09	3	8	12.4486	17.09
P40939	Trifunctional enzyme subunit alpha, mitochondrial OS=Homo sapiens GN=HADHA PE=1 SV=2 - [ECHA_HUMAN]	51.9	2	24	32	388	1.13751e+07	5.72971e+06	3.80422e+06	4.63483e+07	6.8709e+07	699.789	27	14	27	76.1145	28.05	15	28	612.544	25.56	13	22	63.2528	31.45	15	29	582.812	25.95	15	27	76.5184	30.28	18	30	786.422	28.83	15	24	70.8108	35.52	19	31	639.768	26.87	14	24	69.1577	33.68
O60218	Aldo-keto reductase family 1 member B10 OS=Homo sapiens GN=AKR1B10 PE=1 SV=2 - [AK1BA_HUMAN]	51.9	3	8	18	76	0	235127	0	6.03942e+06	5.39614e+06					0	1.9	1	1					2.18538	7.91	2	2									29.27	6.65	2	3	3.67193	7.59	3	4	21.47	3.48	1	1	4.04286	11.08
Q9P0V9-2	Isoform 2 of Septin-10 OS=Homo sapiens GN=SEPT10 - [SEP10_HUMAN]	51.89	7	1	21	34	1.65454e+06	1.83565e+06	492557	2.00734e+07	5.81582e+07					0	14.51	3	3					0	5.17	2	2					0	6.16	3	3					1.65708	11.33	4	6					0	10.14
P51636-2	Isoform Beta of Caveolin-2 OS=Homo sapiens GN=CAV2 - [CAV2_HUMAN]	51.68	5	2	5	9	0	2.44469e+06	520751	13835160	0													0	31.54	3	3					0	12.75	1	1					0	8.05	1	2
P17987	T-complex protein 1 subunit alpha OS=Homo sapiens GN=TCP1 PE=1 SV=1 - [TCPA_HUMAN]	51.62	11	13	23	108	1.72117e+06	2.41684e+06	2.30022e+06	1.51484e+07	6.8375e+06	150.252	9.17	4	5	15.5218	17.81	7	8	260.992	14.57	6	10	29.4122	19.78	8	12	209.03	16.01	6	9	27.0517	25.36	9	13	119.003	11.87	5	7	15.8136	14.03	6	8	88.6	8.63	4	6	14.266	17.99
A6NFE2	Uncharacterized protein C12orf70 OS=Homo sapiens GN=C12orf70 PE=2 SV=2 - [CL070_HUMAN]	51.6	1	1	16	41	4.80402e+06	3.36685e+06	2.85868e+06	5.21133e+07	6.85099e+07					1.99257	12.54	3	4					3.68432	27.41	6	10					6.02467	23.91	5	9					0	11.08	3	4					0	30.03
Q96NY7-2	Isoform A of Chloride intracellular channel protein 6 OS=Homo sapiens GN=CLIC6 - [CLIC6_HUMAN]	51.6	2	20	27	346	1.37792e+06	3.26067e+06	0	6.02793e+07	5.02403e+07					1.62969	17.49	4	4					2.1986	6.12	3	3					0	3.35	1	1	1068.81	32.94	16	44	142.46	34.84	17	47	1032.64	36.59	18	44	134.68	43.29
P29966	Myristoylated alanine-rich C-kinase substrate OS=Homo sapiens GN=MARCKS PE=1 SV=4 - [MARCS_HUMAN]	51.51	1	10	13	222	1.99776e+06	2.36734e+06	2.0694e+06	1.03205e+08	6.78268e+07	224.52	30.42	5	11	38.9178	30.42	5	14	330.749	40.06	6	11	43.7916	40.06	7	12	297.76	40.06	6	10	45.0116	40.36	8	17	630.719	43.67	8	18	70.2258	46.99	9	19	656.847	48.19	9	22	86.721	48.19
F5GX23	Uncharacterized protein OS=Homo sapiens GN=PSMD9 PE=4 SV=1 - [F5GX23_HUMAN]	51.4	7	1	8	11	0	2.37063e+06	0	1.94725e+07	8.34212e+06					0	18.99	1	1					1.83807	7.26	1	1													0	10.06	2	2					0	15.64
Q9Y224	UPF0568 protein C14orf166 OS=Homo sapiens GN=C14orf166 PE=1 SV=1 - [CN166_HUMAN]	51.23	1	7	12	50	6.38977e+06	276996	0	3.72205e+07	2.99029e+07					0	9.02	1	1					0	6.56	1	1									121.303	28.69	7	7	13.7418	29.92	7	8	171.52	32.79	7	10	22.2019	35.66
P26373	60S ribosomal protein L13 OS=Homo sapiens GN=RPL13 PE=1 SV=4 - [RL13_HUMAN]	51.18	2	5	11	39	0	0	0	1.39515e+07	2.33417e+07					2.14273	6.16	1	1					0	5.69	1	1									85.6211	16.59	4	6	8.31001	19.91	5	7	69.3598	16.59	4	8	7.99572	22.75
P02533	Keratin, type I cytoskeletal 14 OS=Homo sapiens GN=KRT14 PE=1 SV=4 - [K1C14_HUMAN]	51.06	19	3	25	170	6.56645e+06	3.28241e+06	6.26377e+06	4.4725e+07	2.7923e+07	113.824	10.81	6	12	21.2098	26.91	10	16	174.31	10.59	5	10	23.2766	26.27	9	15	135.86	10.81	6	11	23.1155	17.37	8	14	141.134	8.05	4	7	18.7402	18.86	10	16	123.867	8.05	4	8	17.9143	24.15
O00299	Chloride intracellular channel protein 1 OS=Homo sapiens GN=CLIC1 PE=1 SV=4 - [CLIC1_HUMAN]	51.04	6	5	8	82	918691	888151	515343	2.50555e+07	2.8366e+07	40.9367	9.96	2	4	8.26513	26.14	4	6	116.702	17.43	3	5	12.5417	21.16	4	6	86.18	17.43	3	6	15.1445	17.43	3	6	114.55	12.45	2	5	15.6076	16.18	3	7	157.25	18.67	4	7	14	18.67
P06733-2	Isoform MBP-1 of Alpha-enolase OS=Homo sapiens GN=ENO1 - [ENOA_HUMAN]	51.03	1	1	13	228	2.24651e+06	2.84812e+06	2.27524e+06	6.15397e+07	5.20289e+08	276.125	21.11	4	12	42.0742	34.9	8	19	157.628	23.17	5	12	31.8903	38.42	10	22	280.02	18.18	5	13	37.297	28.15	8	18	165.329	15.84	5	12	22.7094	19.35	6	14	223.337	27.86	7	16	37.477	35.78
F5H4H8	Uncharacterized protein OS=Homo sapiens GN=PCCB PE=4 SV=1 - [F5H4H8_HUMAN]	51.01	12	9	16	50	1.46878e+06	0	0	4.42238e+07	8.23476e+07					1.79326	11.86	3	3																					0	10.96	4	5					0	6.26
O15144	Actin-related protein 2/3 complex subunit 2 OS=Homo sapiens GN=ARPC2 PE=1 SV=1 - [ARPC2_HUMAN]	51	3	8	17	66	3.79984e+06	1.34557e+06	704941	6.96936e+06	9.76297e+06	24.82	5.67	2	2	4.31479	25.67	5	7	25.9	7.67	2	4	10.8205	24.33	6	10	21.67	10.67	3	4	6.52771	10.67	3	5					0	18.67	5	6					3.29476	10.33
B4DL37	Aldo-keto reductase family 1, member C3 (3-alpha hydroxysteroid dehydrogenase, type II), isoform CRA_c OS=Homo sapiens GN=AKR1C3 PE=2 SV=1 - [B4DL37_HUMAN]	50.98	3	1	7	13	1.95962e+06	0	0	7.40981e+06	0					0	9.31	1	1																					0	6.86	1	2					0	19.12
Q8WUD1	Ras-related protein Rab-2B OS=Homo sapiens GN=RAB2B PE=1 SV=1 - [RAB2B_HUMAN]	50.93	2	1	9	101	1.31414e+06	996666	763814	1.18026e+07	1.20848e+07	33.74	11.57	2	4	9.95406	11.57	2	4	25.86	11.57	2	4	9.29549	16.2	3	5	42.5633	11.57	2	3	9.13719	11.57	2	4	91.64	18.52	3	8	18.7886	18.52	3	10	107.63	21.76	4	10	20.0162	18.52
Q9UHA3	Probable ribosome biogenesis protein RLP24 OS=Homo sapiens GN=RSL24D1 PE=1 SV=1 - [RLP24_HUMAN]	50.92	1	1	7	8	0	650852	466041	0	0					0	13.5	1	1					0	18.4	3	3					0	11.66	2	2					0	4.29	1	1
E7EU96	Uncharacterized protein OS=Homo sapiens GN=CSNK2A1 PE=4 SV=1 - [E7EU96_HUMAN]	50.91	4	2	14	26	3.20968e+06	634089	704969	1.66124e+07	3.56917e+07	21.68	3.9	1	1	2.86502	20.52	4	4					4.35925	21.04	5	6					0	8.57	1	1	29.16	1.56	1	2	0	4.94	2	2					1.60907	14.55
Q7KZF4	Staphylococcal nuclease domain-containing protein 1 OS=Homo sapiens GN=SND1 PE=1 SV=1 - [SND1_HUMAN]	50.88	2	28	41	340	5.96786e+06	8.15335e+06	4.96732e+06	1.08401e+08	4.65412e+07	430.444	19.78	17	32	62.82	24.18	18	32	528.48	22.09	17	30	70.2569	24.84	20	33	449.28	17.69	13	27	69.7803	25.38	17	30	111.97	14.51	12	19	28.4481	19.78	16	25	194.677	15.49	13	23	35.5614	19.78
P20265-3	Isoform N-OCT 5B of POU domain, class 3, transcription factor 2 OS=Homo sapiens GN=POU3F2 - [PO3F2_HUMAN]	50.82	1	1	7	9	377816	0	0	0	0					0	5.33	1	1					0	15.16	2	2					0	6.97	1	1
P51888	Prolargin OS=Homo sapiens GN=PRELP PE=1 SV=1 - [PRELP_HUMAN]	50.79	1	12	16	210	4.21082e+06	3.69129e+06	3.63722e+06	6.95922e+07	6.12627e+07	243.394	20.42	7	17	41.6557	25.13	9	19	240.03	23.04	8	19	46.2353	25.13	9	19	288.765	26.18	9	20	53.1783	26.18	9	19	110.37	20.68	7	18	37.0883	21.73	7	18	181.392	25.92	9	20	45.3749	30.37
P20042	Eukaryotic translation initiation factor 2 subunit 2 OS=Homo sapiens GN=EIF2S2 PE=1 SV=2 - [IF2B_HUMAN]	50.75	2	3	18	43	2.63229e+06	0	2.51165e+06	1.41045e+07	1.13155e+07					0	11.71	4	4					1.72484	3	1	1					0	16.82	4	4	0	3.3	1	1	2.14189	26.13	6	7	27.2	3.6	1	2	10.2973	16.22
Q15149-6	Isoform 6 of Plectin OS=Homo sapiens GN=PLEC - [PLEC_HUMAN]	50.74	18	1	223	1015	3.1501e+07	5.10864e+07	3.61526e+07	1.64316e+08	2.14434e+08	887.932	13.1	48	79	171.11	17.93	68	113	945.675	12.85	50	76	141.848	16.15	62	95	990.942	12.66	50	79	163.262	17.64	66	99	502.536	8.75	34	52	80.8617	15.07	54	79	621.72	10.42	39	58	94.4915	16.81
Q5JYR6	Ribophorin II OS=Homo sapiens GN=RPN2 PE=2 SV=1 - [Q5JYR6_HUMAN]	50.73	7	21	23	352	4.38114e+06	5.03734e+06	4.93957e+06	8.71373e+07	8.58297e+07	464.632	36.42	13	21	58.9608	37.72	14	22	579.094	30.08	11	21	69.5882	34.47	12	22	399.046	22.76	9	16	46.5831	28.46	11	19	1188.67	36.91	15	34	113.987	40	17	38	991.693	40.49	18	36	105.451	40.98
P61006	Ras-related protein Rab-8A OS=Homo sapiens GN=RAB8A PE=1 SV=1 - [RAB8A_HUMAN]	50.72	32	3	12	120	2.28533e+06	2.31722e+06	2.63047e+06	1.68033e+08	1.57809e+08	128.742	21.74	4	5	13.7237	28.5	5	7	93.22	15.94	3	5	10.2441	33.33	5	7	126.797	15.94	3	4	7.72602	20.29	4	6	124.002	21.26	4	8	16.0924	34.78	6	11	194.593	28.5	6	12	31.3561	34.78
Q9NS69	Mitochondrial import receptor subunit TOM22 homolog OS=Homo sapiens GN=TOMM22 PE=1 SV=3 - [TOM22_HUMAN]	50.7	1	4	4	34	585105	580354	463759	1.19081e+07	9.59846e+06	99.1225	8.45	1	2	6.90784	8.45	1	2	91.24	8.45	1	2	7.90202	8.45	1	2	64.8588	8.45	1	2	6.99233	8.45	1	2	135.15	16.2	2	4	11.2988	16.2	2	4	160.04	33.1	3	5	17.2407	33.1
Q9H1E3	Nuclear ubiquitous casein and cyclin-dependent kinases substrate OS=Homo sapiens GN=NUCKS1 PE=1 SV=1 - [NUCKS_HUMAN]	50.62	2	4	13	59	2.64892e+07	2.74312e+07	2.25815e+07	2.04703e+08	1.98399e+08					0	15.64	2	5					0	7.41	2	5					0	10.7	2	5					0	25.1	3	4					0	4.94
C9JEU5	Uncharacterized protein OS=Homo sapiens GN=FGG PE=4 SV=1 - [C9JEU5_HUMAN]	50.56	6	15	19	150	2.43116e+06	2.5296e+06	2.35847e+06	9.64232e+07	7.04452e+07	127.033	17.08	5	8	15.1962	17.08	5	8	100.997	17.75	5	12	14.5158	12.58	3	7	181.22	17.08	5	10	21.2544	18.43	6	11	276.624	19.55	7	13	33.7947	28.09	9	19	274.667	25.17	7	11	35.9403	40.67
F8VTY8	Uncharacterized protein OS=Homo sapiens GN=PA2G4 PE=4 SV=1 - [F8VTY8_HUMAN]	50.53	6	6	15	60	3.16696e+06	1.29269e+06	590553	7.51851e+06	4.94181e+06	25.19	3.72	2	3	0	2.13	1	2	0	5.59	3	4	2.63774	13.3	3	4					0	10.9	2	2	41.9013	8.24	3	6	9.80096	6.38	2	4	27.68	9.31	3	4	8.72915	9.31
Q15149-3	Isoform 3 of Plectin OS=Homo sapiens GN=PLEC - [PLEC_HUMAN]	50.53	18	1	222	1012	3.1501e+07	5.10864e+07	3.61526e+07	1.64316e+08	2.14434e+08	887.932	12.8	47	78	171.11	17.59	67	112	945.675	12.8	50	76	141.848	16.08	62	95	990.942	12.6	50	79	163.262	17.57	66	99	502.536	8.71	34	52	80.8617	15.27	55	80	621.72	10.13	38	57	94.4915	16.48
P60903	Protein S100-A10 OS=Homo sapiens GN=S100A10 PE=1 SV=2 - [S10AA_HUMAN]	50.52	1	3	5	124	2.36509e+06	0	1.11214e+06	3.87228e+07	4.94201e+07	47.4519	17.53	3	6	13.5087	46.39	4	12	32.38	17.53	2	7	13.2103	46.39	3	9	26.6	17.53	2	5	12.1182	46.39	3	14	122.713	17.53	3	10	18.1609	50.52	5	15	110.469	17.53	3	11	20.8222	46.39
P27824	Calnexin OS=Homo sapiens GN=CANX PE=1 SV=2 - [CALX_HUMAN]	50.51	11	22	39	655	1.02584e+07	1.0506e+07	8.08226e+06	1.3228e+08	1.20794e+08	870.903	31.76	19	46	114.97	37.16	22	53	741.065	24.66	16	43	110.561	28.55	19	49	605.495	28.89	17	38	88.6623	34.97	19	46	1075.96	31.25	19	47	120.113	38.18	23	53	997.811	28.89	17	42	117.81	31.93
O75367-3	Isoform 3 of Core histone macro-H2A.1 OS=Homo sapiens GN=H2AFY - [H2AY_HUMAN]	50.4	5	8	14	51	351245	8.7477e+06	9.88415e+06	1.00828e+07	1.54651e+07	49.6354	6.74	2	2	7.81306	12.4	3	3	50.7328	11.32	3	3	15.1931	21.56	5	7	28.85	4.04	1	1	3.19772	8.36	2	2	0	2.43	1	2	7.54373	9.97	4	8					0	2.43
P12235	ADP/ATP translocase 1 OS=Homo sapiens GN=SLC25A4 PE=1 SV=4 - [ADT1_HUMAN]	50.34	2	3	15	216	8.25547e+06	7.87258e+06	1.87082e+07	1.45186e+08	1.30366e+08	201.701	14.09	4	10	22.3997	14.09	4	10	258.02	19.8	6	15	29.8173	25.17	7	16	231.373	19.8	6	12	28.7654	34.56	8	16	188.395	24.16	8	22	24.8585	30.2	10	24	200	24.16	8	23	29.0094	24.83
Q5W145	NADH dehydrogenase (Ubiquinone) 1 beta subcomplex, 8, 19kDa OS=Homo sapiens GN=NDUFB8 PE=2 SV=1 - [Q5W145_HUMAN]	50.32	6	4	9	46	502566	117757	208443	9.10307e+06	7.9636e+06					0	7.1	1	1					0	15.48	1	1					2.74704	15.48	3	3	86.2711	16.13	2	3	6.57364	19.35	3	5	57.09	12.26	1	1	3.49564	33.55
Q8N4Q1-2	Isoform 2 of Mitochondrial intermembrane space import and assembly protein 40 OS=Homo sapiens GN=CHCHD4 - [MIA40_HUMAN]	50.32	2	3	6	25	3.20824e+06	295214	462796	0	0					0	7.1	1	1					0	16.77	1	2					0	31.61	3	4	48.1	11.61	1	1	3.98975	11.61	1	1
Q13011	Delta(3,5)-Delta(2,4)-dienoyl-CoA isomerase, mitochondrial OS=Homo sapiens GN=ECH1 PE=1 SV=2 - [ECH1_HUMAN]	50.3	1	8	13	80	1.01632e+06	1.92044e+06	1.29486e+06	1.64902e+07	3.70338e+07	90.43	13.72	3	5	14.0191	22.56	5	7	149.245	18.6	5	9	20.3966	32.01	7	11	147.177	18.6	5	11	22.6668	18.6	5	11	33.61	3.05	1	2	6.26103	14.94	3	4	50.8933	5.79	2	3	5.83225	13.72
E9PCV6	Uncharacterized protein OS=Homo sapiens GN=COL6A3 PE=4 SV=1 - [E9PCV6_HUMAN]	50.25	10	96	130	2516	4.4984e+07	4.82532e+07	3.62662e+07	4.81981e+08	4.54837e+08	4209.33	28.38	73	218	555.254	30.97	80	237	4655.4	29.53	77	213	589.671	33.42	86	248	4074.2	27.54	73	206	545.108	31.31	81	232	4696.22	31.88	81	230	618.127	35.34	89	259	4680.88	34.03	87	258	653.727	37.99
B4DPJ8	Uncharacterized protein OS=Homo sapiens GN=CCT6A PE=2 SV=1 - [B4DPJ8_HUMAN]	50.2	6	12	20	97	1.23875e+06	2.42958e+06	852182	6.9253e+06	8.94946e+06	250.174	20.6	6	8	32.7017	26	9	14	237.87	18	6	9	23.3136	24.4	9	12	211.748	14	4	7	24.5083	21.6	7	10					3.41768	9.6	4	5	30.73	11.4	5	6	11.6491	27.6
P27348	14-3-3 protein theta OS=Homo sapiens GN=YWHAQ PE=1 SV=1 - [1433T_HUMAN]	50.2	5	5	13	297	7.74752e+06	7.73671e+06	7.27261e+06	1.78015e+08	1.64389e+08	206.038	32.24	8	15	28.8793	29.8	7	13	253.374	33.88	7	12	32.2002	37.14	8	15	200.017	38.78	9	14	34.881	38.78	9	15	645.675	46.53	12	29	73.1368	46.53	11	29	683.058	46.53	12	32	85.1821	50.2
P22695	Cytochrome b-c1 complex subunit 2, mitochondrial OS=Homo sapiens GN=UQCRC2 PE=1 SV=3 - [QCR2_HUMAN]	50.11	1	13	18	297	6.16964e+06	3.17953e+06	5.58396e+06	3.61658e+07	34197910	448.455	32.23	10	25	62.8359	30.46	10	25	380.38	34.22	10	19	58.447	36.2	11	21	415.926	32.45	10	24	68.0985	32.45	10	26	477.362	26.71	8	19	51.7753	29.14	9	20	462.342	24.72	9	21	53.3049	25.61
P10301	Ras-related protein R-Ras OS=Homo sapiens GN=RRAS PE=1 SV=1 - [RRAS_HUMAN]	50	7	5	12	62	1.12976e+06	525303	455252	1.95713e+07	1.42756e+07	95.1167	7.34	1	3	13.9931	22.48	3	6	68.93	7.34	1	1	4.00134	21.56	3	3	89.69	7.34	1	2	11.3865	21.56	3	5	150.47	20.64	5	8	10.9219	13.76	3	5	135.277	16.97	4	6	12.2856	22.02
P19338	Nucleolin OS=Homo sapiens GN=NCL PE=1 SV=3 - [NUCL_HUMAN]	50	3	15	38	253	5.33207e+06	3.66686e+06	1.71777e+06	6.2591e+07	7.71093e+07	190.418	14.93	10	14	29.7301	21.13	12	21	240.455	13.94	10	18	40.1473	26.34	16	31	221.304	10.85	7	14	29.4665	19.86	12	19	207.067	10	7	12	25.5836	16.34	11	18	145.575	10.99	8	12	19.0483	14.23
P47985	Cytochrome b-c1 complex subunit Rieske, mitochondrial OS=Homo sapiens GN=UQCRFS1 PE=1 SV=2 - [UCRI_HUMAN]	50	2	4	8	57	0	0	0	1.69437e+07	1.9476e+07	122.004	12.77	2	2	11.9804	12.77	2	3	76.81	5.11	1	2	8.60245	5.11	1	2	37.88	5.11	1	1	4.4354	5.11	1	1	20.28	14.6	3	6	7.09488	14.96	3	5	87.63	8.03	2	4	9.77	37.59
P59998	Actin-related protein 2/3 complex subunit 4 OS=Homo sapiens GN=ARPC4 PE=1 SV=3 - [ARPC4_HUMAN]	50	7	7	9	84	748649	7.62919e+06	1.42637e+06	5.59123e+07	5.49154e+07	38.33	6.55	1	2	5.34742	13.1	2	3	59.9433	16.07	3	6	11.0366	30.36	5	8	51.72	16.07	3	6	9.39876	22.62	4	7	104.903	35.71	5	9	20.2392	35.71	5	10	90.9202	17.86	3	6	15.2756	22.62
P60468	Protein transport protein Sec61 subunit beta OS=Homo sapiens GN=SEC61B PE=1 SV=2 - [SC61B_HUMAN]	50	1	3	6	55	2.25252e+06	2.5355e+06	2.56724e+06	4.44064e+07	2.84947e+07	34.99	21.88	2	4	3.90101	30.21	3	5	45.39	21.88	2	4	3.52866	30.21	3	6	39.46	21.88	2	4	5.68956	30.21	3	6	60.625	21.88	2	3	2.08505	34.38	5	7	57.7251	11.46	1	2	4.37668	23.96
P55145	Mesencephalic astrocyte-derived neurotrophic factor OS=Homo sapiens GN=MANF PE=1 SV=3 - [MANF_HUMAN]	50	1	6	10	44	2.28673e+06	750725	268092	4.42063e+07	3.61667e+07					2.18174	28.57	4	5					2.29855	9.34	1	2					0	9.34	1	1					0	6.04	1	1					0	6.04
Q9P0J0	NADH dehydrogenase [ubiquinone] 1 alpha subcomplex subunit 13 OS=Homo sapiens GN=NDUFA13 PE=1 SV=3 - [NDUAD_HUMAN]	50	2	4	7	49	0	5.63077e+06	2.62097e+06	7.47109e+06	7.64344e+06					1.74369	9.03	1	1	40.12	25	3	3	2.48732	20.14	2	3	52.15	16.67	2	3	6.68417	21.53	3	4	63.1067	15.28	2	4	8.78539	22.22	3	6	111.87	22.22	3	6	9.64464	22.22
P00352	Retinal dehydrogenase 1 OS=Homo sapiens GN=ALDH1A1 PE=1 SV=2 - [AL1A1_HUMAN]	49.9	5	16	21	375	3.09046e+06	2.32855e+06	2.19188e+06	1.17069e+08	1.47543e+08	202.446	20.76	7	14	35.4921	20.76	7	15	144.769	22.16	8	13	32.2806	22.16	8	14	157.677	19.56	7	16	34.6825	24.75	9	18	576.448	31.74	13	34	100.438	34.33	14	40	509.154	26.75	11	31	83.2363	36.73
P31943	Heterogeneous nuclear ribonucleoprotein H OS=Homo sapiens GN=HNRNPH1 PE=1 SV=4 - [HNRH1_HUMAN]	49.89	16	3	14	77	1.15322e+06	1.07241e+06	832576	3.69833e+08	4.769e+06	190.777	16.7	5	8	20.204	20.71	6	10	160.33	15.37	4	6	17.8028	20.04	5	7	166.73	11.14	3	5	17.0923	18.49	5	7					0	3.79	1	2					0	14.03
P00325	Alcohol dehydrogenase 1B OS=Homo sapiens GN=ADH1B PE=1 SV=2 - [ADH1B_HUMAN]	49.87	5	6	15	126	3.60268e+06	3.80734e+06	3.48348e+06	4.24095e+07	3.99535e+07	38.6	17.33	4	6	9.37281	17.6	4	7	56.3733	24.27	5	8	12.3336	22.4	4	8	63.1496	26.4	6	10	12.1045	30.67	7	9	94.0992	24.27	7	11	15.5517	21.07	6	11	125.534	30.4	9	16	19.1266	28.27
B5MCQ5	Uncharacterized protein OS=Homo sapiens GN=PDIA6 PE=3 SV=1 - [B5MCQ5_HUMAN]	49.8	5	16	24	347	7.98779e+06	7.61359e+06	5.41892e+06	1.04882e+08	1.44249e+08	371.26	20.9	8	14	39.2794	27.46	10	16	480.179	23.57	9	17	51.9956	26.84	10	19	475.378	21.52	8	15	47.3536	24.8	9	16	668.685	30.12	12	29	75.284	33.81	15	32	733.662	30.12	12	32	75.1175	31.76
Q13228	Selenium-binding protein 1 OS=Homo sapiens GN=SELENBP1 PE=1 SV=2 - [SBP1_HUMAN]	49.79	8	10	17	85	0	1.23004e+06	837271	2.09197e+07	1.21225e+07	88.6383	2.97	1	2	6.60787	7.63	2	3	68.46	2.97	1	1	3.5327	8.47	2	2	75.53	2.97	1	1	3.57093	2.97	1	1	82.5633	9.11	4	7	15.1758	17.8	7	13	66.2167	9.11	4	7	17.8161	18.86
P35900	Keratin, type I cytoskeletal 20 OS=Homo sapiens GN=KRT20 PE=1 SV=1 - [K1C20_HUMAN]	49.76	4	8	19	73	3.08966e+06	3.52193e+06	9.91922e+06	1.89948e+07	1.38535e+07	265.19	8.96	3	6	21.7928	20.52	6	9	233.427	8.96	3	6	22.0457	14.86	7	10	266.551	15.8	5	8	26.0405	26.18	9	13					0	5.9	2	2					0	7.78
Q499Y3	Putative uncharacterized protein C10orf88-like OS=Homo sapiens PE=2 SV=2 - [YJ016_HUMAN]	49.73	1	1	7	12	0	0	0	6.4019e+06	59232558					1.69455	8.56	1	1					0	7.49	1	1													1.62168	4.81	1	1					0	5.88
B7Z6B8	Uncharacterized protein OS=Homo sapiens GN=DECR1 PE=2 SV=1 - [B7Z6B8_HUMAN]	49.69	5	6	15	134	581710	1.1278e+06	876844	4.26678e+07	3.2609e+07	71.6367	8.28	3	4	5.7999	6.44	2	3	71.7367	15.03	4	5	14.5555	20.25	6	10	47.65	9.82	2	4	6.38965	11.96	3	5	197.33	23.31	6	11	27.5334	25.46	7	12	171.816	21.78	7	10	17.7503	29.14
F5H3F1	Uncharacterized protein OS=Homo sapiens GN=CALU PE=4 SV=1 - [F5H3F1_HUMAN]	49.66	2	1	8	36	1.17666e+06	1.02985e+06	796068	3.70967e+06	4.58173e+06	51.17	7.48	1	2	5.13991	7.48	1	2	63.94	7.48	1	2	4.36627	14.29	2	3	50.46	7.48	1	2	6.24695	14.29	2	3	86.53	27.89	3	4	7.08318	35.37	5	6	29.4733	21.09	2	3	3.94093	21.09
Q14165	Malectin OS=Homo sapiens GN=MLEC PE=1 SV=1 - [MLEC_HUMAN]	49.66	3	10	18	135	2.56211e+06	2.85402e+06	1.96278e+06	1.4771e+07	7.9336e+06	143.005	23.63	7	12	31.1393	26.37	8	14	195.127	29.11	7	13	37.1521	29.11	8	17	164.151	22.95	6	9	23.828	33.56	11	14	40.27	8.56	2	2	9.33188	13.01	3	4	150.233	8.56	3	4	14.8003	8.56
P34932	Heat shock 70 kDa protein 4 OS=Homo sapiens GN=HSPA4 PE=1 SV=4 - [HSP74_HUMAN]	49.64	2	9	30	103	470409	1.754e+06	1.00175e+06	1.62457e+07	2.07153e+07					5.01552	7.86	3	4	21.52	2.62	1	1	6.84001	12.26	5	6					2.76428	10	4	5	80.7258	5.6	3	6	18.3669	15.36	9	12	129.692	9.17	5	6	16.3611	25
F6RFD5	Uncharacterized protein OS=Homo sapiens GN=DSTN PE=4 SV=1 - [F6RFD5_HUMAN]	49.63	3	1	6	20	836536	2.7067e+06	2.99714e+06	1.9212e+07	1.47813e+07					3.63671	11.85	2	4					0	5.19	1	2					0	18.52	2	3					0	9.63	2	3					2.38436	23.7
B4DUA0	Uncharacterized protein OS=Homo sapiens GN=LCP1 PE=2 SV=1 - [B4DUA0_HUMAN]	49.49	1	1	10	97	1.13325e+06	625897	565997	2.03404e+07	2.34094e+07	97.47	15.31	2	4	9.30936	28.06	4	7	73.36	15.31	2	4	10.1235	29.08	4	7	68.91	15.31	2	5	11.1018	21.94	4	8	331.571	27.55	4	7	23.3227	35.71	5	8	252.001	27.55	4	7	19.663	40.31
P51991	Heterogeneous nuclear ribonucleoprotein A3 OS=Homo sapiens GN=HNRNPA3 PE=1 SV=2 - [ROA3_HUMAN]	49.47	4	6	17	127	2.46724e+06	2.55802e+06	1.5607e+06	3.10886e+07	1.72238e+07	244.278	18.52	6	11	29.381	19.84	6	11	273.571	18.52	6	15	34.8739	21.69	7	16	218.975	14.55	5	12	22.2246	25.93	7	12					4.39504	15.61	5	9	37.23	5.82	2	4	12.436	9.79
Q9H4M9	EH domain-containing protein 1 OS=Homo sapiens GN=EHD1 PE=1 SV=2 - [EHD1_HUMAN]	49.44	10	10	21	77	1.05751e+06	971665	762867	5.54575e+07	2.58841e+07	55.68	2.25	1	2	11.4365	5.81	3	8	33.89	2.25	1	1	4.61128	3.93	2	5	62.59	2.25	1	2	9.89412	14.23	4	6	63.9059	9.74	5	6	11.5273	13.86	7	10	66.21	11.99	6	9	16.5612	13.86
P30044-2	Isoform Cytoplasmic+peroxisomal of Peroxiredoxin-5, mitochondrial OS=Homo sapiens GN=PRDX5 - [PRDX5_HUMAN]	49.38	4	6	7	117	787054	294936	644177	5.3701e+07	4.96981e+07	50.06	30.25	3	4	8.92052	30.25	3	4	45.71	21.6	2	2	8.90071	21.6	2	3	67.39	28.4	3	5	13.0774	35.8	4	6	148.26	32.72	4	7	21.7591	43.83	5	13	132.989	48.77	6	12	29.247	48.77
P12109	Collagen alpha-1(VI) chain OS=Homo sapiens GN=COL6A1 PE=1 SV=3 - [CO6A1_HUMAN]	49.32	3	24	41	807	2.34347e+07	2.52271e+07	1.84228e+07	3.49546e+08	3.88405e+08	1502.75	26.65	21	65	171.744	30.06	23	76	1699.09	27.24	22	68	197.915	27.63	22	73	1466.87	27.04	21	61	177.998	32.68	25	72	1443.58	27.92	23	80	197.702	35.21	28	90	1546.53	25.29	21	76	190.934	31.23
P49755	Transmembrane emp24 domain-containing protein 10 OS=Homo sapiens GN=TMED10 PE=1 SV=2 - [TMEDA_HUMAN]	49.32	1	7	11	153	3.3772e+06	3.43632e+06	2.76416e+06	95351490	6.68797e+07	426.303	27.4	5	12	37.2873	27.4	5	14	620.616	34.7	6	13	47.8347	39.27	7	17	428.368	34.7	6	10	33.2794	34.7	6	14	384.254	25.57	6	11	28.964	30.14	7	14	357.201	21.92	4	10	30.9367	33.33
P48047	ATP synthase subunit O, mitochondrial OS=Homo sapiens GN=ATP5O PE=1 SV=1 - [ATPO_HUMAN]	49.3	1	8	10	133	1.81013e+06	1.94359e+06	1.30241e+06	8.30668e+07	8.03159e+07	81.09	26.76	5	8	15.5453	26.76	5	8	93.68	26.76	5	8	13.5393	33.33	6	9	57.62	26.76	5	8	14.6561	26.76	5	8	175.67	33.33	6	10	20.2343	39.44	7	11	232.705	30.05	5	11	17.4039	27.7
P47756-2	Isoform 2 of F-actin-capping protein subunit beta OS=Homo sapiens GN=CAPZB - [CAPZB_HUMAN]	49.26	8	9	16	135	1.21102e+07	2.86871e+06	6.78632e+06	30627242	2.09316e+07	243.471	26.84	7	12	28.5512	37.13	9	15	334.414	26.84	7	12	31.5882	43.38	11	16	208.213	21.32	5	8	26.6391	37.87	8	16	225.257	19.85	5	8	23.49	25	6	10	58.1	16.18	4	5	8.63696	24.63
B4DY24	Uncharacterized protein OS=Homo sapiens GN=PPT1 PE=2 SV=1 - [B4DY24_HUMAN]	49.26	6	3	8	21	0	0	0	2.15066e+07	1.48949e+07					0	10.34	2	2													0	11.82	1	1					2.90708	11.33	2	2					5.26518	19.21
O00264	Membrane-associated progesterone receptor component 1 OS=Homo sapiens GN=PGRMC1 PE=1 SV=3 - [PGRC1_HUMAN]	49.23	2	5	6	61	1.14446e+06	663496	238459	2.7897e+07	1.7314e+07	76.1667	10.26	1	4	14.797	10.26	1	4					1.67545	18.97	3	4	73.35	10.26	1	3	10.8221	10.26	1	3	182.35	18.46	3	7	14.2547	18.46	3	7	156.72	18.46	3	7	12.9084	18.46
B9A058	Uncharacterized protein OS=Homo sapiens GN=HIBCH PE=4 SV=1 - [B9A058_HUMAN]	49.08	1	1	10	27	1.10058e+06	2.00501e+06	593239	2.19615e+06	3.30041e+06					0	16.56	2	2					0	16.56	1	1					0	7.36	1	1					0	9.82	1	1					0	7.36
C9JW90	Uncharacterized protein OS=Homo sapiens GN=PITPNB PE=4 SV=1 - [C9JW90_HUMAN]	49.08	6	3	12	34	2.07058e+06	3.16506e+06	422752	0	9.56808e+07					1.68189	9.59	2	2					0	21.03	4	5					1.84305	18.45	3	4					0	5.9	2	2					0	14.02
P47914	60S ribosomal protein L29 OS=Homo sapiens GN=RPL29 PE=1 SV=2 - [RL29_HUMAN]	49.06	1	1	7	16	0	0	0	1.23834e+07	5.79708e+06					0	15.09	2	2																	68.03	9.43	1	2	5.67157	9.43	1	2	46.43	9.43	1	1	3.16148	9.43
O94929	Actin-binding LIM protein 3 OS=Homo sapiens GN=ABLIM3 PE=1 SV=3 - [ABLM3_HUMAN]	49.05	1	1	21	37	6.58277e+06	8.10737e+06	5.54049e+06	3.23672e+06	1.85699e+08					1.6608	11.13	4	5					0	9.08	4	4					1.91836	12.45	4	5					2.44764	12.3	5	6					0	13.76
P01009-2	Isoform 2 of Alpha-1-antitrypsin OS=Homo sapiens GN=SERPINA1 - [A1AT_HUMAN]	49.03	6	14	17	207	581207	507052	673093	8.95774e+07	8.55734e+07					6.9385	7.24	2	3	55.08	14.21	4	4	8.28562	15.88	4	4	33.26	2.79	1	2	6.50678	12.26	3	4	292.367	27.3	10	23	59.0519	29.53	11	29	320.937	38.72	13	28	64.8802	36.77
Q9NP72	Ras-related protein Rab-18 OS=Homo sapiens GN=RAB18 PE=1 SV=1 - [RAB18_HUMAN]	49.03	3	1	9	14	1.24835e+06	382742	0	2.31174e+06	0					0	5.34	1	1					0	14.56	2	2									27.53	10.19	2	2	3.58602	23.3	4	4
Q9NRF9	DNA polymerase epsilon subunit 3 OS=Homo sapiens GN=POLE3 PE=1 SV=1 - [DPOE3_HUMAN]	48.98	1	1	5	32	5.04158e+07	5.40315e+07	4.75753e+07	1.45332e+08	8.42023e+07					0	13.61	2	4					0	13.61	2	3					0	13.61	2	4					0	29.93	3	6					0	32.65
P17568	NADH dehydrogenase [ubiquinone] 1 beta subcomplex subunit 7 OS=Homo sapiens GN=NDUFB7 PE=1 SV=4 - [NDUB7_HUMAN]	48.91	1	2	9	25	1.45386e+06	168499	1.26657e+06	9.81912e+06	5.16814e+06	52.86	10.95	1	1	3.0079	24.82	3	4	35.85	10.95	1	1	2.78468	22.63	3	4					0	19.71	2	3					1.60484	11.68	1	1					0	29.93
Q04760	Lactoylglutathione lyase OS=Homo sapiens GN=GLO1 PE=1 SV=4 - [LGUL_HUMAN]	48.91	2	3	6	33	1.37343e+07	1.48488e+07	9.72061e+06	208518140	0					6.41364	19.57	2	5					6.46989	5.98	1	3					6.8398	5.98	1	3					4.29037	10.33	2	3					1.90187	5.98
O43615	Mitochondrial import inner membrane translocase subunit TIM44 OS=Homo sapiens GN=TIMM44 PE=1 SV=2 - [TIM44_HUMAN]	48.89	1	4	24	40	6.49067e+06	1.18798e+07	4.84421e+06	4.75606e+07	4.18559e+07					0	5.09	2	2					0	8.19	3	3					0	11.5	4	4	46.94	4.65	2	2	5.32622	18.14	7	7	26.63	5.09	2	3	4.14377	15.93
P55072	Transitional endoplasmic reticulum ATPase OS=Homo sapiens GN=VCP PE=1 SV=4 - [TERA_HUMAN]	48.88	3	25	39	306	2.53255e+06	3.7708e+06	2.71437e+06	3.56278e+07	3.26299e+07	439.637	21.59	11	17	48.2075	23.33	11	20	453.89	21.22	10	15	53.9285	33	17	25	371.069	22.21	13	18	55.2839	34.62	18	25	344.317	15.01	9	17	47.8202	24.07	16	27	383.53	13.28	7	13	47.4262	24.94
Q9Y570-2	Isoform 2 of Protein phosphatase methylesterase 1 OS=Homo sapiens GN=PPME1 - [PPME1_HUMAN]	48.74	1	1	8	10	0	0	0	5.32549e+06	4.40994e+06					0	6.03	1	1													0	5.53	1	1					0	27.64	3	3					0	13.57
P49821	NADH dehydrogenase [ubiquinone] flavoprotein 1, mitochondrial OS=Homo sapiens GN=NDUFV1 PE=1 SV=4 - [NDUV1_HUMAN]	48.71	10	5	19	78	1.01213e+06	6.12491e+06	4.29051e+06	1.16173e+08	2.68208e+07	33.1	3.23	1	1	5.00724	10.34	3	3	57.47	5.17	2	3	6.84879	8.84	3	6	71.0064	5.17	2	4	9.45418	20.04	6	8	41.81	5.39	3	3	3.96015	9.48	4	4	48.12	2.16	1	2	3.9466	8.62
F5H7V2	Uncharacterized protein OS=Homo sapiens PE=4 SV=1 - [F5H7V2_HUMAN]	48.71	8	1	11	16	16869229	0	1.59726e+06	5261020	1.23649e+08					0	7.75	1	1					0	7.75	1	1					1.96203	16.97	3	3					0	16.24	3	3					0	9.96
P00441	Superoxide dismutase [Cu-Zn] OS=Homo sapiens GN=SOD1 PE=1 SV=2 - [SODC_HUMAN]	48.7	1	2	4	10	450834	2.02628e+06	0	1.51633e+07	1.55058e+07					0	21.43	1	1					0	8.44	1	1													4.30501	18.83	2	3	29.86	7.79	1	2	4.28593	7.79
P62888	60S ribosomal protein L30 OS=Homo sapiens GN=RPL30 PE=1 SV=2 - [RL30_HUMAN]	48.7	3	2	8	22	0	0	3.73311e+06	1.55531e+07	2.29777e+07													0	11.3	1	1					0	13.91	2	2	50.1987	5.22	1	2	3.63872	15.65	2	3	45.5489	12.17	2	4	3.44687	27.83
P62701	40S ribosomal protein S4, X isoform OS=Homo sapiens GN=RPS4X PE=1 SV=2 - [RS4X_HUMAN]	48.67	6	12	15	140	1.83031e+06	2.42837e+06	2.44664e+06	3.14728e+07	2.61508e+07	37.2103	19.39	5	6	6.33178	21.67	6	9	63.02	28.9	7	10	18.0549	34.98	9	16	14.6	21.29	6	8	14.2641	26.24	8	14	89.0351	16.35	5	9	13.3588	20.91	7	16	59.34	20.91	6	11	10.5483	31.18
P54577	Tyrosyl-tRNA synthetase, cytoplasmic OS=Homo sapiens GN=YARS PE=1 SV=4 - [SYYC_HUMAN]	48.67	1	16	26	103	603878	1.08779e+06	1.90734e+06	7.15885e+07	1.57458e+07					0	2.08	1	1					1.88035	6.06	3	3					0	2.84	1	1	175.921	15.91	9	15	31.9692	26.52	14	23	102.737	12.88	7	12	27.332	19.13
D6RB85	Uncharacterized protein OS=Homo sapiens GN=CANX PE=3 SV=1 - [D6RB85_HUMAN]	48.61	6	1	9	125	6.76498e+06	7.45343e+06	5.92695e+06	1.92674e+07	1.548e+07	273.787	25	4	10	25.4479	31.94	5	12	226.947	26.39	5	9	24.1894	31.94	5	9	246.956	25	4	11	26.5168	31.94	5	14	131.517	25	3	5	12.2621	31.94	4	6	142.773	18.75	3	5	12.7301	18.75
Q9Y6M9	NADH dehydrogenase [ubiquinone] 1 beta subcomplex subunit 9 OS=Homo sapiens GN=NDUFB9 PE=1 SV=3 - [NDUB9_HUMAN]	48.6	4	1	6	8	3.10728e+06	0	290722	0	0					0	6.15	1	1					0	18.44	1	1					0	5.03	1	1					0	7.82	1	1
P09471-2	Isoform Alpha-2 of Guanine nucleotide-binding protein G(o) subunit alpha OS=Homo sapiens GN=GNAO1 - [GNAO_HUMAN]	48.59	6	2	15	97	5.13286e+06	7.69569e+06	3.58494e+06	8.73038e+07	7.15767e+07	122.734	7.91	3	7	14.649	26.55	7	12	123.048	6.5	2	6	15.0345	9.6	3	7	96.3034	6.5	2	6	19.8192	23.45	5	10	128.934	14.41	4	11	25.72	16.67	5	13	115.24	14.41	4	10	25.9462	14.41
Q96FQ6	Protein S100-A16 OS=Homo sapiens GN=S100A16 PE=1 SV=1 - [S10AG_HUMAN]	48.54	1	2	5	9	0	0	1.19194e+06	0	3.93477e+07													0	9.71	1	1					2.226	33.01	3	3					0	15.53	1	1	32.81	11.65	1	1	2.0964	11.65
P40926	Malate dehydrogenase, mitochondrial OS=Homo sapiens GN=MDH2 PE=1 SV=3 - [MDHM_HUMAN]	48.52	2	13	15	278	4.22581e+06	4.10781e+06	2.56681e+06	8.13549e+07	7.30742e+07	417.05	36.09	10	19	54.7742	36.09	10	20	269.299	27.81	8	12	38.1144	27.81	8	13	251.049	22.49	7	14	30.8836	27.22	8	15	390.055	39.35	11	24	58.1958	41.42	12	28	471.598	41.42	12	25	65.848	39.35
E7EQL5	Uncharacterized protein OS=Homo sapiens GN=DYNC1I2 PE=4 SV=1 - [E7EQL5_HUMAN]	48.52	19	4	11	58	2.55655e+06	2.64795e+06	662399	2.26071e+07	6.7309e+06					1.91107	13.77	4	7					0	17.7	5	5					0	21.31	3	4	85.29	10.49	2	3	12.5722	11.48	2	4	58.35	10.49	2	3	4.52543	10.49
Q16762	Thiosulfate sulfurtransferase OS=Homo sapiens GN=TST PE=1 SV=4 - [THTR_HUMAN]	48.48	3	4	8	42	0	1.65714e+06	408966	0	4.88688e+06									24.15	6.4	2	2	2.52572	10.44	2	2					0	6.4	1	1									47.73	4.04	1	2	3.78216	14.48
P51164	Potassium-transporting ATPase subunit beta OS=Homo sapiens GN=ATP4B PE=1 SV=1 - [ATP4B_HUMAN]	48.45	1	5	11	131	0	778887	451903	8.7491e+07	8.1219e+07					2.78606	6.19	1	2					2.7463	11.68	2	2					0	5.5	1	1	246.697	17.53	4	13	32.4962	19.59	4	15	158.774	18.21	4	12	30.3226	25.43
P20648	Potassium-transporting ATPase alpha chain 1 OS=Homo sapiens GN=ATP4A PE=2 SV=5 - [ATP4A_HUMAN]	48.41	1	25	45	446	3.20955e+06	2.39546e+06	2.08506e+06	7.93172e+07	7.03341e+07	274.74	11.11	8	12	42.1729	21.35	14	21	333.69	10.82	8	12	40.1532	15.46	10	15	231.776	10.72	7	11	39.3169	16.14	13	20	592.943	24.15	20	40	97.7762	27.25	26	53	646.139	21.06	18	40	98.0088	26.28
P61011	Signal recognition particle 54 kDa protein OS=Homo sapiens GN=SRP54 PE=1 SV=1 - [SRP54_HUMAN]	48.41	2	5	22	60	2.26387e+06	2.38151e+06	1.22085e+06	8.05842e+07	2.94466e+07	47.9241	1.79	1	2	4.48122	10.52	3	4	35.9746	1.79	1	2	0	8.73	4	5	51.97	1.79	1	2	4.2128	12.1	3	5	90.8403	4.17	2	3	8.20321	20.44	6	8	56.3	6.15	2	2	8.27692	18.85
P18621	60S ribosomal protein L17 OS=Homo sapiens GN=RPL17 PE=1 SV=3 - [RL17_HUMAN]	48.37	2	3	10	29	1.58143e+07	1.90176e+07	1.49311e+07	7.06011e+07	7.95444e+07					1.82825	8.7	2	4					3.83273	14.13	2	3					1.67457	9.24	2	3					7.66429	22.83	4	5					3.85816	12.5
O75874	Isocitrate dehydrogenase [NADP] cytoplasmic OS=Homo sapiens GN=IDH1 PE=1 SV=2 - [IDHC_HUMAN]	48.31	4	8	22	169	1.34629e+06	7.65222e+06	4.79865e+06	8.67474e+07	1.89452e+08	103.352	11.35	4	9	24.6488	19.08	6	11	81.2618	15.94	6	10	14.311	17.15	6	10	69.97	10.63	4	7	14.9588	13.77	5	8	104.05	18.12	7	11	17.7953	25.12	9	14	65.32	18.6	7	10	12.82	28.26
Q96KP4	Cytosolic non-specific dipeptidase OS=Homo sapiens GN=CNDP2 PE=1 SV=2 - [CNDP2_HUMAN]	48.21	2	13	21	112	614637	630183	1.84693e+06	4.56722e+07	1.69364e+07	0	1.68	1	1	3.49425	7.79	4	5	27.07	6.53	3	3	5.90138	8.84	4	4	35.86	4.84	2	2	8.27011	10.32	4	5	85.91	16.84	5	8	18.6937	25.68	9	14	122.17	21.47	6	11	26.0477	27.79
P08779	Keratin, type I cytoskeletal 16 OS=Homo sapiens GN=KRT16 PE=1 SV=4 - [K1C16_HUMAN]	48.2	17	1	21	139	3.66046e+06	3.28241e+06	3.34819e+06	5.22431e+07	4.21498e+07	141.68	11.21	5	10	22.7702	17.55	6	11	139.36	7.82	4	8	21.7834	20.93	8	14	109.306	9.09	5	8	17.8107	14.59	7	12	141.134	6.98	4	7	14.2038	25.37	11	15	123.867	5.29	3	6	14.3129	9.09
Q8WVC2	40S ribosomal protein S21 OS=Homo sapiens GN=RPS21 PE=2 SV=1 - [Q8WVC2_HUMAN]	48.15	3	2	5	24	1.22282e+06	1.17265e+06	2.75475e+06	3.02299e+08	3.28731e+08	73.7	17.28	1	2	6.65558	17.28	1	3	70.4	17.28	1	2	7.53144	17.28	1	2	61.15	17.28	1	2	6.43805	29.63	2	4					0	34.57	2	3					0	25.93
E9PKX9	Uncharacterized protein OS=Homo sapiens GN=MBP PE=4 SV=1 - [E9PKX9_HUMAN]	48.15	17	1	5	11	0	0	725411	1.04726e+07	0													0	12.96	1	1					0	24.07	2	2					0	12.96	1	2					0	12.96
P11233	Ras-related protein Ral-A OS=Homo sapiens GN=RALA PE=1 SV=1 - [RALA_HUMAN]	48.06	1	2	8	16	0	0	0	3.80667e+06	5.30158e+06									20.76	6.8	1	1	2.51141	23.3	3	4													0	3.4	1	1					0	18.93
P53999	Activated RNA polymerase II transcriptional coactivator p15 OS=Homo sapiens GN=SUB1 PE=1 SV=3 - [TCP4_HUMAN]	48.03	4	5	10	68	1.58534e+06	1.14032e+06	1.9973e+06	0	0	41.5433	26.77	3	5	8.85979	38.58	4	6	85.88	18.9	2	4	9.42767	39.37	5	9	68.0133	29.92	3	4	10.4414	38.58	5	8					0	11.02	1	1					0	7.87
Q01518	Adenylyl cyclase-associated protein 1 OS=Homo sapiens GN=CAP1 PE=1 SV=5 - [CAP1_HUMAN]	48	17	13	24	243	2.66407e+06	1.22783e+06	2.38669e+06	5.32738e+07	3.11998e+07	195.29	12.84	5	12	26.2982	13.68	5	12	145.02	13.68	5	9	21.2896	18.32	7	12	269.085	13.68	5	10	32.255	17.89	7	14	342.814	18.32	7	13	37.8854	32	13	24	260.323	17.47	7	14	36.4209	30.74
Q15124	Phosphoglucomutase-like protein 5 OS=Homo sapiens GN=PGM5 PE=1 SV=2 - [PGM5_HUMAN]	47.97	3	14	24	129	2.11387e+06	2.58013e+06	1.74973e+06	1.82062e+07	1.92969e+07	145.773	10.23	4	6	18.0147	19.75	7	10	162.788	11.99	5	7	15.0699	14.81	6	8	244.044	16.58	7	13	36.8725	21.34	9	15	72.0133	13.93	8	14	18.0308	16.4	8	14	103.73	19.58	9	17	27.1037	16.4
P05388	60S acidic ribosomal protein P0 OS=Homo sapiens GN=RPLP0 PE=1 SV=1 - [RLA0_HUMAN]	47.95	13	12	16	163	3.06555e+06	3.23331e+06	2.43788e+06	4.77897e+07	4.855e+07	217.719	28.08	7	13	33.1412	26.18	6	13	225.61	26.18	6	12	38.1812	26.18	6	14	293.233	24.29	5	10	30.58	28.08	7	14	324.767	33.75	9	16	41.1235	35.02	10	19	219.864	29.02	8	16	29.0917	33.44
P46940	Ras GTPase-activating-like protein IQGAP1 OS=Homo sapiens GN=IQGAP1 PE=1 SV=1 - [IQGA1_HUMAN]	47.92	4	40	66	417	6.35527e+06	903337	2.72786e+06	8.40676e+07	1.36933e+08	255.914	4.89	5	8	31.1055	9.41	11	17	330.195	7.36	7	10	35.0531	9.54	10	15	329.273	6.28	7	10	29.5852	8.33	10	14	916.97	21.36	29	50	127.563	23.66	34	59	1075.14	23.72	30	51	140.609	29.87
Q9Y3I0	tRNA-splicing ligase RtcB homolog OS=Homo sapiens GN=C22orf28 PE=1 SV=1 - [RTCB_HUMAN]	47.92	4	8	23	60	3.76788e+06	1.95733e+06	923837	7.44357e+06	1.07213e+07	32.01	4.75	2	2	8.07063	20.79	6	6	40.16	2.38	1	1	2.39413	5.15	2	3	37.52	4.16	2	3	7.47647	9.5	4	6					5.69192	14.65	6	7					3.49337	13.86
B4DJV2	Citrate synthase OS=Homo sapiens GN=CS PE=2 SV=1 - [B4DJV2_HUMAN]	47.9	18	11	16	119	2.03301e+06	1.10821e+06	2.25476e+06	4.51326e+07	4.08411e+07					0	7.51	3	5					0	4.42	2	3					1.6582	7.73	3	3	198.91	21.63	9	14	28.5122	29.14	10	20	153.513	22.52	9	15	24.875	32.45
P60866	40S ribosomal protein S20 OS=Homo sapiens GN=RPS20 PE=1 SV=1 - [RS20_HUMAN]	47.9	4	2	6	49	0	0	0	2.54943e+07	3.29522e+07					1.98663	16.81	2	2					0	15.97	1	1									127.587	19.33	2	8	20.2039	26.89	3	10	124.983	19.33	2	8	17.2001	26.89
P61163	Alpha-centractin OS=Homo sapiens GN=ACTR1A PE=1 SV=1 - [ACTZ_HUMAN]	47.87	3	1	13	31	568367	2.68408e+06	0	7903238	1.94761e+06	71.39	6.12	2	3	7.71573	21.01	5	6	62.39	3.99	1	2	11.0107	14.36	3	5					3.88295	3.99	1	2					0	4.26	1	1					0	6.38
Q9BX68	Histidine triad nucleotide-binding protein 2, mitochondrial OS=Homo sapiens GN=HINT2 PE=1 SV=1 - [HINT2_HUMAN]	47.85	1	2	6	13	0	2.12908e+06	0	0	6.55814e+06					0	5.52	1	1					0	20.86	1	1																					3.22679	33.13
P55735	Protein SEC13 homolog OS=Homo sapiens GN=SEC13 PE=1 SV=3 - [SEC13_HUMAN]	47.83	2	1	9	29	7.06828e+07	2.69309e+07	1.03516e+06	14860959	1.52192e+07					0	7.76	2	4	40.02	5.28	1	1	3.17935	28.26	5	9	26.07	5.28	1	1	5.06867	19.57	3	5					0	17.08	2	4					0	17.08
P27695	DNA-(apurinic or apyrimidinic site) lyase OS=Homo sapiens GN=APEX1 PE=1 SV=2 - [APEX1_HUMAN]	47.8	1	6	13	79	740148	1.77411e+06	225587	1.1636e+07	1.6628e+07	37.2567	8.18	2	4	13.4299	17.3	5	7	30.1	8.49	2	3	6.45304	14.78	3	4	40.04	8.18	2	3	15.4	29.56	6	8	81.1467	17.3	4	8	10.2145	22.64	5	6	93.8933	15.41	3	5	9.15176	17.61
B8ZZW7	Uncharacterized protein OS=Homo sapiens GN=PTMA PE=4 SV=1 - [B8ZZW7_HUMAN]	47.79	8	6	9	123	1.01229e+07	3.55694e+06	3.39808e+06	3.77808e+07	4.14921e+07	194.3	10.29	2	4	14.118	16.18	3	6	208.89	10.29	2	4	15.181	10.29	2	4	272.57	10.29	2	4	15.1651	16.18	3	6	510.207	11.03	4	12	45.437	21.32	5	14	478.635	19.85	6	13	45.2966	31.62
P04632	Calpain small subunit 1 OS=Homo sapiens GN=CAPNS1 PE=1 SV=1 - [CPNS1_HUMAN]	47.76	2	7	12	99	1.35918e+06	944808	1.41454e+06	2.74962e+07	2.48161e+07	79.93	12.69	3	5	11.9466	21.64	5	10	108.272	13.06	3	5	12.3951	22.39	4	6	32.1533	10.45	3	4	7.61321	22.76	4	7	153.62	15.3	5	11	12.7302	22.39	6	12	78.74	21.64	5	10	15.3154	24.25
P24821-5	Isoform 5 of Tenascin OS=Homo sapiens GN=TNC - [TENA_HUMAN]	47.73	8	1	61	569	1.0455e+07	1.12126e+07	9.51852e+06	8.55271e+07	1.6286e+08	519.656	21.33	25	40	110.687	26.83	31	56	914.938	22.42	25	45	127.571	28.34	30	57	789.859	20.97	24	45	128.687	24.59	28	58	1120.58	23.99	29	55	149.002	29.12	35	70	900.165	24.53	28	49	137.036	29.49
O96000	NADH dehydrogenase [ubiquinone] 1 beta subcomplex subunit 10 OS=Homo sapiens GN=NDUFB10 PE=1 SV=3 - [NDUBA_HUMAN]	47.67	2	1	9	20	0	0	592172	2.1298e+07	3.50911e+06													0	13.95	1	1					1.74459	14.53	2	3					3.85946	26.16	4	6					0	13.95
Q9BWH2	FUN14 domain-containing protein 2 OS=Homo sapiens GN=FUNDC2 PE=1 SV=2 - [FUND2_HUMAN]	47.62	1	2	8	15	0	0	0	2.27867e+07	5.26935e+06																					0	6.35	1	1					0	34.39	4	4					1.98108	20.63
P13645	Keratin, type I cytoskeletal 10 OS=Homo sapiens GN=KRT10 PE=1 SV=6 - [K1C10_HUMAN]	47.6	17	20	29	299	3.58367e+06	4.13707e+06	3.12506e+06	5.36867e+07	4.4272e+07	378.507	21.4	12	23	57.4651	27.23	15	28	511.687	18.49	10	19	52.6127	20.03	11	22	435.592	19.18	10	18	54.4858	22.43	12	23	320.877	18.49	9	15	33.0259	27.57	14	22	250.69	14.73	8	15	32.3933	24.32
B7Z2V6	Uncharacterized protein OS=Homo sapiens GN=ATP6V1A PE=2 SV=1 - [B7Z2V6_HUMAN]	47.6	1	1	17	26	641251	536860	414852	1.75217e+07	1.40602e+07					0	5.09	2	3					0	6.89	2	3					0	5.09	2	3					0	22.75	7	7					0	13.17
D6RA08	Uncharacterized protein OS=Homo sapiens GN=C1QB PE=4 SV=1 - [D6RA08_HUMAN]	47.6	3	2	7	10	0	0	0	3.76692e+06	1.29468e+07					0	9.61	1	1					0	9.61	1	1													2.3946	13.97	2	2	0	14.41	2	2	2.72902	17.47
Q9P016	Thymocyte nuclear protein 1 OS=Homo sapiens GN=THYN1 PE=1 SV=1 - [THYN1_HUMAN]	47.56	2	1	11	12	0	6.11648e+06	2.39471e+06	5.42075e+06	1.10251e+08					1.63325	6.22	1	1					0	8.89	2	2					0	8.89	1	1					1.62089	11.11	2	2					0	7.11
F5H740	Uncharacterized protein OS=Homo sapiens GN=VDAC3 PE=4 SV=1 - [F5H740_HUMAN]	47.54	8	6	10	106	1.26301e+06	2.98754e+06	1.61544e+06	2.55232e+07	2.81437e+07	264.648	17.25	3	9	34.8343	24.3	4	12	288.001	21.83	4	10	40.4799	33.8	6	13	285.746	21.83	4	10	39.2828	21.83	4	11	112.044	3.52	1	5	13.5654	9.15	2	6	173.945	11.97	3	9	21.8073	11.97
P30504	HLA class I histocompatibility antigen, Cw-4 alpha chain OS=Homo sapiens GN=HLA-C PE=1 SV=1 - [1C04_HUMAN]	47.54	10	0	16	138	5.27953e+06	5.43778e+06	4.13131e+06	9.54836e+07	7.45936e+07	157.987	16.94	6	11	23.2274	27.05	8	13	289.913	17.21	6	11	30.6457	13.66	4	10	208.556	15.85	6	10	18.0057	14.21	5	10	259.624	16.94	5	14	42.2392	16.94	5	14	203.03	13.11	4	12	37.3041	26.78
Q29865	HLA class I histocompatibility antigen, Cw-18 alpha chain OS=Homo sapiens GN=HLA-C PE=2 SV=1 - [1C18_HUMAN]	47.54	13	0	16	132	5.27953e+06	5.12741e+06	3.9467e+06	9.54836e+07	7.45936e+07	125.014	16.94	6	10	19.3795	27.05	8	13	150.266	13.39	5	7	14.8998	9.84	3	5	139.687	15.85	6	9	14.4502	14.21	5	8	259.624	16.94	5	14	44.1558	20.77	6	16	203.03	13.11	4	12	40.6636	30.6
Q07021	Complement component 1 Q subcomponent-binding protein, mitochondrial OS=Homo sapiens GN=C1QBP PE=1 SV=1 - [C1QBP_HUMAN]	47.52	1	5	9	79	3.76561e+06	3.27598e+06	2.4392e+06	1.82197e+07	0	215.991	21.99	4	7	21.0576	25.53	5	9	217.915	32.62	5	9	28.1369	39.01	6	11	237.057	21.99	4	9	25.9632	23.4	5	11	73.79	7.09	1	2	9.79803	10.64	2	4					0	4.61
O75306	NADH dehydrogenase [ubiquinone] iron-sulfur protein 2, mitochondrial OS=Homo sapiens GN=NDUFS2 PE=1 SV=2 - [NDUS2_HUMAN]	47.52	3	7	17	77	5.03743e+06	0	369580	5.35397e+07	2.42867e+07					0	13.39	4	4					0	1.73	1	1	25.03	4.97	2	2	4.76632	14.9	5	5	80.02	2.59	1	2	7.16712	20.3	7	12	261.046	12.31	5	10	20.7841	16.85
Q96HG3	Islet cell autoantigen 1, 69kDa OS=Homo sapiens GN=ICA1 PE=2 SV=1 - [Q96HG3_HUMAN]	47.51	7	1	17	26	6.73739e+06	3.32426e+06	3.06055e+06	2.73045e+07	1.16057e+07					0	7.05	2	2					0	10.37	3	3					2.02492	19.29	5	5					0	11.2	4	5					0	17.22
Q9BUK6-4	Isoform 4 of Protein misato homolog 1 OS=Homo sapiens GN=MSTO1 - [MSTO1_HUMAN]	47.47	7	1	4	9	0	0	0	14601271	1.28206e+07																													1.7283	28.28	2	3					0	12.12
P62330	ADP-ribosylation factor 6 OS=Homo sapiens GN=ARF6 PE=1 SV=2 - [ARF6_HUMAN]	47.43	11	3	7	24	1.06464e+06	926187	763606	3.79194e+07	0	79.43	5.71	1	2	8.05104	16.57	2	3	81.88	5.71	1	2	9.4334	24	3	4	76.61	5.71	1	2	6.94146	5.71	1	2					0	18.86	3	5
P54819-6	Isoform 6 of Adenylate kinase 2, mitochondrial OS=Homo sapiens GN=AK2 - [KAD2_HUMAN]	47.4	10	6	14	87	1.0992e+06	2.47163e+06	1.67319e+06	1.44371e+07	2.58245e+07	136.54	6.77	1	2	10.8718	19.27	2	4	96.63	6.77	1	1	4.39084	40.63	5	5	80.53	19.27	2	2	6.23555	31.25	4	4	128.21	17.71	3	5	13.5392	30.21	4	6	121.65	24.48	3	6	18.1385	31.77
P50454	Serpin H1 OS=Homo sapiens GN=SERPINH1 PE=1 SV=2 - [SERPH_HUMAN]	47.37	13	9	16	101	403030	292064	509925	3.42575e+07	2.64874e+07	75.8855	5.5	2	4	11.5395	9.57	3	6	71.2126	12.68	4	5	11.9612	12.68	4	5	76.7646	12.68	4	6	15.1004	12.68	4	6	193.997	12.44	5	10	20.912	25.84	9	15	167.528	15.55	6	10	25.6313	16.99
C9JES7	Putative uncharacterized protein MGC61571 OS=Homo sapiens GN=CMC1 PE=4 SV=1 - [C9JES7_HUMAN]	47.37	2	1	5	8	0	1.36603e+07	0	1.6233e+07	9.82026e+06													0	17.11	1	1													1.65088	35.53	3	3					0	9.21
P07195	L-lactate dehydrogenase B chain OS=Homo sapiens GN=LDHB PE=1 SV=2 - [LDHB_HUMAN]	47.31	5	11	17	251	1.55771e+06	1.68713e+06	1.38213e+06	1.30281e+08	1.13379e+08	173.107	20.66	6	11	25.9982	20.66	6	10	205.807	20.66	6	9	22.9437	20.66	6	9	115.13	14.97	4	7	14.372	15.27	4	7	438.503	35.03	11	24	65.225	43.11	14	31	511.144	36.83	12	28	66.9708	37.43
P06748	Nucleophosmin OS=Homo sapiens GN=NPM1 PE=1 SV=2 - [NPM_HUMAN]	47.28	5	7	13	177	7.80739e+06	8.37509e+06	6.02352e+06	2.85138e+08	2.86062e+08	274.605	26.19	5	14	28.5935	34.35	6	14	267.195	26.19	5	10	28.3833	26.19	5	12	235.108	24.15	5	9	22.5651	24.15	5	9	348.118	26.53	7	19	34.2197	31.97	9	21	378.94	26.53	7	18	35.4842	23.81
P13164	Interferon-induced transmembrane protein 1 OS=Homo sapiens GN=IFITM1 PE=1 SV=3 - [IFM1_HUMAN]	47.2	5	1	3	10	0	813277	0	8.914e+06	0					0	33.6	1	1	45.34	12.8	1	1	2.90482	12.8	1	1	53.68	12.8	1	1	4.19449	12.8	1	1	23.1	12.8	1	1	3.97208	13.6	2	2
P05026	Sodium/potassium-transporting ATPase subunit beta-1 OS=Homo sapiens GN=ATP1B1 PE=1 SV=1 - [AT1B1_HUMAN]	47.19	4	4	17	54	2.30689e+06	2.02577e+06	2784376	3.65659e+07	4.39498e+07					0	17.82	4	4					1.76675	13.53	4	5					0	5.28	1	1	49.046	10.89	3	4	11.8467	27.06	7	10	38.8157	14.52	4	7	9.39364	25.08
C9J5N9	Uncharacterized protein OS=Homo sapiens GN=APOOL PE=4 SV=2 - [C9J5N9_HUMAN]	47.19	2	6	10	36	0	0	342222	6.19137e+06	5.97037e+06									25.68	5.99	1	1	5.8193	13.11	2	2	69.55	5.99	1	1	3.21871	21.35	3	3	92.1	10.49	2	4	11.2729	14.98	3	5	109.22	10.49	2	2	6.06964	17.6
P51608	Methyl-CpG-binding protein 2 OS=Homo sapiens GN=MECP2 PE=1 SV=1 - [MECP2_HUMAN]	47.12	5	3	18	68	423124	1.30955e+06	120090	1.50036e+07	1.80158e+08					2.05884	6.58	2	2					2.34795	7.2	2	2					2.16308	9.05	2	2	95.35	8.23	2	5	17.124	19.55	6	11	131.07	8.23	2	6	19.221	23.05
Q9Y6N5	Sulfide:quinone oxidoreductase, mitochondrial OS=Homo sapiens GN=SQRDL PE=1 SV=1 - [SQRD_HUMAN]	47.11	1	13	20	130	1.89584e+06	2.17215e+06	1.55653e+06	2.95871e+07	2.2465e+07	120.646	15.56	6	12	26.5421	17.11	7	13	70.49	15.33	5	8	17.4913	16.89	6	10	49.5309	16.67	6	7	15.9211	18.22	7	11	140.023	12.22	4	7	17.0507	22.44	6	10	102.53	14.67	6	10	13.9299	13.33
O15173	Membrane-associated progesterone receptor component 2 OS=Homo sapiens GN=PGRMC2 PE=1 SV=1 - [PGRC2_HUMAN]	47.09	1	7	11	84	3.2741e+06	1.71402e+06	2.63539e+06	2.71684e+07	2.94727e+07	130.13	12.11	2	3	7.28306	21.97	3	5	150.613	23.32	4	5	10.7176	18.39	3	4	113.26	12.11	2	3	7.40318	12.11	2	3	143.16	18.39	3	4	11.8842	26.46	4	5	147.084	22.42	4	7	12.8478	30.49
F5GXX5	Uncharacterized protein OS=Homo sapiens GN=DAD1 PE=4 SV=1 - [F5GXX5_HUMAN]	47.06	3	3	4	67	2.268e+06	2.29577e+06	3.53251e+06	5.91454e+07	7.96491e+07	33.22	35.29	3	4	7.28473	25.88	2	3	43.8167	35.29	3	6	11.689	35.29	3	5	33.83	32.94	3	5	10.0096	21.18	2	4	42.27	35.29	3	5	12.6685	35.29	3	5	100.22	35.29	3	9	17.2003	35.29
C9J4Z3	Ribosomal protein L37a, isoform CRA_c OS=Homo sapiens GN=RPL37A PE=4 SV=1 - [C9J4Z3_HUMAN]	47.06	2	1	4	5	0	0	0	0	0									24.02	26.47	1	1	1.84934	26.47	1	1																					0	17.65
F5H3I4	Uncharacterized protein OS=Homo sapiens GN=ACTR1A PE=3 SV=1 - [F5H3I4_HUMAN]	47.02	2	1	11	22	264876	1.71545e+06	0	0	0					0	21.19	4	4					1.82903	12.25	2	2					3.88295	4.97	1	2
P31937	3-hydroxyisobutyrate dehydrogenase, mitochondrial OS=Homo sapiens GN=HIBADH PE=1 SV=2 - [3HIDH_HUMAN]	47.02	1	7	12	64	3.55849e+06	6.46778e+06	0	2.06204e+07	2.25482e+07					5.97075	20.83	4	6					0	6.85	1	1									147.61	15.77	4	5	13.8031	22.62	5	6	176.103	21.43	5	7	19.4479	31.25
Q9BTV4	Transmembrane protein 43 OS=Homo sapiens GN=TMEM43 PE=1 SV=1 - [TMM43_HUMAN]	47	1	6	13	71	2.23542e+06	0	1.83497e+06	4.52823e+07	1.30712e+07	96.98	15.75	3	5	12.4785	24.75	5	7	114.27	13.5	2	4	13.6792	13.5	2	4	99.4568	20.75	5	9	22.833	30.25	7	11	90.45	14.25	4	9	16.8309	23.25	6	12	47.1767	9.25	2	3	5.20371	9.25
F8W7T7	Uncharacterized protein OS=Homo sapiens GN=ZNF44 PE=4 SV=1 - [F8W7T7_HUMAN]	46.99	4	1	20	31	340900	2.38627e+06	0	1.51474e+07	14814413					2.51692	12.52	4	4					0	13.01	3	4					0	8.46	3	3					1.62132	7.48	5	5					0	6.67
Q96AG4	Leucine-rich repeat-containing protein 59 OS=Homo sapiens GN=LRRC59 PE=1 SV=1 - [LRC59_HUMAN]	46.91	1	7	19	87	1.66406e+06	2.53315e+06	2.14053e+06	1.46179e+07	7.11075e+06					5.79088	16.61	4	7	68.61	11.4	4	7	5.54693	15.96	4	7	39.97	8.79	3	3	11.2756	15.96	4	5	111.56	13.36	4	6	12.0445	15.96	5	7	41.19	6.51	2	3	5.49459	20.52
B0QYH2	HscB iron-sulfur cluster co-chaperone homolog (E. coli) OS=Homo sapiens GN=HSCB PE=4 SV=1 - [B0QYH2_HUMAN]	46.85	2	1	6	20	282286	0	0	2386244411	1921235242					0	18.88	2	2					0	13.99	1	1													0	12.59	2	3					0	5.59
Q14764	Major vault protein OS=Homo sapiens GN=MVP PE=1 SV=4 - [MVP_HUMAN]	46.81	2	22	31	180	1.65478e+06	1.81373e+06	1.55703e+06	2.47076e+07	24894715	354.387	14	9	16	49.9387	15.01	10	17	377.886	18.7	11	20	57.2658	20.6	13	23	346.669	13.77	7	10	39.8243	20.6	11	15	86.47	7.95	6	8	18.1726	9.18	7	9	103.551	10.41	8	10	20.197	15.79
O95831-3	Isoform 3 of Apoptosis-inducing factor 1, mitochondrial OS=Homo sapiens GN=AIFM1 - [AIFM1_HUMAN]	46.8	7	16	25	287	2.0915e+06	1.8544e+06	1.41229e+06	1.48967e+07	2.77388e+07	132.93	13.46	6	14	26.5555	15.27	7	14	208.885	16.58	8	15	37.5278	16.91	9	18	222.46	17.24	8	13	32.9586	17.24	8	13	253.4	22.82	10	19	36.9516	25.12	12	21	249.48	20.53	10	17	36.3509	21.18
P12956	X-ray repair cross-complementing protein 6 OS=Homo sapiens GN=XRCC6 PE=1 SV=2 - [XRCC6_HUMAN]	46.8	8	18	27	129	832330	2.80612e+07	4.16034e+06	7.18175e+06	1.71234e+07	157.53	6.4	4	6	16.8758	9.69	6	10	203.732	7.55	4	8	22.3562	11.99	7	11	208.02	13.96	7	10	23.4702	20.2	10	14	28.33	5.58	4	6	7.28081	8.87	5	7	51.93	8.37	4	6	12.6406	11.49
O75380	NADH dehydrogenase [ubiquinone] iron-sulfur protein 6, mitochondrial OS=Homo sapiens GN=NDUFS6 PE=1 SV=1 - [NDUS6_HUMAN]	46.77	2	1	4	8	0	0	1.30478e+06	0	0													0	12.1	1	1					1.64261	22.58	2	2													0	8.87
Q01469	Fatty acid-binding protein, epidermal OS=Homo sapiens GN=FABP5 PE=1 SV=3 - [FABP5_HUMAN]	46.67	1	2	7	28	0	319232	3.05122e+06	2.13198e+07	3.12358e+07													0	24.44	2	2					0	4.44	1	2	24.36	6.67	1	1	1.65323	21.48	3	4	59.84	13.33	2	4	6.63461	17.78
P12236	ADP/ATP translocase 3 OS=Homo sapiens GN=SLC25A6 PE=1 SV=4 - [ADT3_HUMAN]	46.64	2	1	13	259	8.68283e+06	8.12488e+06	1.87082e+07	1.45507e+08	1.34335e+08	309.995	20.13	6	14	34.4676	20.13	6	14	360.549	22.82	7	19	40.4761	28.19	8	21	344.394	22.82	7	18	40.2172	37.58	9	21	231.98	31.54	10	25	31.3537	31.54	10	26	210.057	27.18	9	24	29.3849	27.18
P30042	ES1 protein homolog, mitochondrial OS=Homo sapiens GN=C21orf33 PE=1 SV=3 - [ES1_HUMAN]	46.64	3	5	9	66	864786	854759	813218	2.52486e+07	1.12921e+07					4.01677	15.3	3	8	33.81	11.94	2	2	6.21673	11.94	2	4	26.67	3.73	1	2	4.44968	3.73	1	2	27.55	11.94	2	4	11.6728	37.69	6	8	47.4333	21.27	3	4	9.83117	21.27
P62913	60S ribosomal protein L11 OS=Homo sapiens GN=RPL11 PE=1 SV=2 - [RL11_HUMAN]	46.63	2	3	11	81	2.22736e+07	2.27924e+06	1.459e+06	3.10034e+07	1.03647e+08	110.04	17.42	3	5	10.6617	20.22	3	6	108.863	25.84	5	8	10.817	21.35	4	7	78.42	16.85	3	5	11.1206	21.35	4	7	126.24	18.54	4	8	11.1651	27.53	5	9	127.42	21.35	4	8	11.1944	21.35
Q9P0L0	Vesicle-associated membrane protein-associated protein A OS=Homo sapiens GN=VAPA PE=1 SV=3 - [VAPA_HUMAN]	46.59	2	5	11	142	2.22667e+06	2.52446e+06	2.47509e+06	2.45437e+07	4.10007e+07	166.671	20.88	4	9	16.9956	29.72	5	12	69.5367	12.05	2	7	14.432	26.91	5	12	68.76	10.84	2	5	6.5468	21.29	4	9	213.899	14.86	3	8	20.3708	18.07	4	11	177.883	14.86	3	8	16.0955	24.9
O75438	NADH dehydrogenase [ubiquinone] 1 beta subcomplex subunit 1 OS=Homo sapiens GN=NDUFB1 PE=1 SV=1 - [NDUB1_HUMAN]	46.55	2	2	4	13	6.45228e+06	879353	3.312e+06	0	6064252					1.85445	34.48	2	2					1.95155	18.97	1	1					2.14161	34.48	2	2													0	15.52
Q8IYD9-2	Isoform 2 of Uncharacterized protein C18orf54 OS=Homo sapiens GN=C18orf54 - [CR054_HUMAN]	46.53	2	1	13	19	0	1.73205e+06	263617	2.37597e+08	1.75378e+07													0	9.57	2	2					0	5.07	1	1					0	16.89	5	5					0	18.39
P11177	Pyruvate dehydrogenase E1 component subunit beta, mitochondrial OS=Homo sapiens GN=PDHB PE=1 SV=3 - [ODPB_HUMAN]	46.52	5	7	14	69	0	1.35537e+06	673572	1.09215e+07	1.59257e+07	27.09	4.46	1	1	2.61554	13.09	3	3	107.76	8.91	2	2	6.84638	13.37	3	4	202.73	13.37	3	5	17.4262	20.89	4	7	48.5763	4.46	1	2	5.39218	7.8	2	3					0	11.42
P59768	Guanine nucleotide-binding protein G(I)/G(S)/G(O) subunit gamma-2 OS=Homo sapiens GN=GNG2 PE=1 SV=2 - [GBG2_HUMAN]	46.48	1	1	2	16	392345	0	329307	2.58017e+07	26298271					1.91609	22.54	1	1													3.76926	22.54	1	2					4.26528	46.48	2	3	33.16	22.54	1	2	4.73925	22.54
F5H4L7	Uncharacterized protein OS=Homo sapiens GN=VPS26A PE=4 SV=1 - [F5H4L7_HUMAN]	46.45	3	1	7	11	503489	0	0	7.43915e+06	1.40601e+07					0	9.68	1	2													0	10	1	1					0	4.84	1	1					0	13.23
P12110	Collagen alpha-2(VI) chain OS=Homo sapiens GN=COL6A2 PE=1 SV=4 - [CO6A2_HUMAN]	46.42	4	24	42	665	2.35439e+07	2.33227e+07	1.69549e+07	4.34509e+08	3.54747e+08	1155.18	21.69	19	60	187.818	30.42	24	72	1068.03	22.57	20	61	173.009	24.34	21	67	914.316	19.33	17	47	138.409	22.87	19	54	877.807	16.09	18	59	129.941	16.88	18	58	1007.39	15.41	17	63	143.238	24.14
Q5SNX5	Protein FAM27E2 OS=Homo sapiens GN=FAM27E2 PE=2 SV=1 - [F27E2_HUMAN]	46.4	1	1	5	5	2.49289e+06	0	0	0	0					0	17.6	2	2					0	20.8	1	1					0	13.6	1	1
P62857	40S ribosomal protein S28 OS=Homo sapiens GN=RPS28 PE=1 SV=1 - [RS28_HUMAN]	46.38	1	1	3	19	0	0	0	1.97662e+07	31963696																									79.44	17.39	1	2	5.81228	27.54	2	4	88.84	17.39	1	2	5.20418	17.39
P07900-2	Isoform 2 of Heat shock protein HSP 90-alpha OS=Homo sapiens GN=HSP90AA1 - [HS90A_HUMAN]	46.37	8	9	33	333	4.66474e+06	4.01893e+06	3.2178e+06	1.00347e+08	8.12893e+07	386.67	10.77	7	17	46.5688	13.35	9	21	392.71	10.89	9	20	45.5491	14.4	9	21	395.888	17.1	11	20	53.9728	19.09	12	25	355.951	10.66	9	22	41.5713	16.16	13	25	358.799	9.25	8	24	45.6469	17.92
P81605	Dermcidin OS=Homo sapiens GN=DCD PE=1 SV=2 - [DCD_HUMAN]	46.36	2	2	2	6	0	0	0	0	0	28.39	10	1	1	2.23376	10	1	1	25.38	10	1	1	2.02682	10	1	2																	0	36.36	1	1
P13521	Secretogranin-2 OS=Homo sapiens GN=SCG2 PE=1 SV=2 - [SCG2_HUMAN]	46.35	3	3	28	46	1.48456e+06	987989	411218	4.01537e+07	4.2996e+07					0	18.8	7	7					0	13.61	5	5					0	7.13	3	3	20.75	2.92	2	2	1.87887	13.29	7	7					1.87963	11.99
B4DWW1	Uncharacterized protein OS=Homo sapiens GN=ARL1 PE=2 SV=1 - [B4DWW1_HUMAN]	46.34	6	4	8	32	3.60396e+06	2.81463e+06	1.91901e+06	1.77501e+07	1.30824e+07					2.33293	12.8	1	2					2.34833	26.22	2	3					9.09382	21.34	2	4	123.155	18.29	3	5	12.4897	15.24	2	4	94.85	8.54	1	2	9.69486	21.34
E7EWF1	Uncharacterized protein OS=Homo sapiens GN=RPL4 PE=4 SV=1 - [E7EWF1_HUMAN]	46.31	4	7	24	58	1.10428e+06	0	0	3.05178e+07	2.65191e+07					0	6.4	2	2																	84.3073	17.98	9	15	14.1478	26.35	10	16	41.5399	15.76	6	8	12.5764	18.47
Q12912-2	Isoform 2 of Lymphoid-restricted membrane protein OS=Homo sapiens GN=LRMP - [LRMP_HUMAN]	46.29	4	1	21	33	1.46401e+06	1.27313e+06	294836	1.16444e+07	15571809					0	13.03	3	3					0	4.21	1	1					0	10.22	3	3					0	16.83	3	4					0	15.03
Q9UII2	ATPase inhibitor, mitochondrial OS=Homo sapiens GN=ATPIF1 PE=1 SV=1 - [ATIF1_HUMAN]	46.23	1	2	5	14	0	0	0	0	6.62258e+06																					0	21.7	1	1													1.62406	19.81
Q68Y55	Poly(RC) binding protein 2 OS=Homo sapiens GN=PCBP2 PE=2 SV=1 - [Q68Y55_HUMAN]	46.22	36	3	12	104	2.69071e+07	2.26001e+06	1.04032e+07	2.17687e+07	6.31085e+07	102.68	12.99	2	5	16.604	16.62	3	6	137.507	15.71	3	5	14.0235	18.43	4	7	118.167	15.41	3	6	10.7916	16.62	3	6	144.17	12.39	3	6	18.7837	18.43	5	8	155.44	14.8	4	8	18.9122	18.43
Q2M329	Coiled-coil domain-containing protein 96 OS=Homo sapiens GN=CCDC96 PE=2 SV=2 - [CCD96_HUMAN]	46.13	1	1	24	60	7.64136e+06	9.03204e+06	8.26062e+06	4.94473e+07	8.62852e+07					3.81417	7.39	3	4					5.54004	7.39	3	4					2.23251	9.01	4	4					1.81651	15.68	6	9					1.76797	10.81
P61586	Transforming protein RhoA OS=Homo sapiens GN=RHOA PE=1 SV=1 - [RHOA_HUMAN]	46.11	11	5	12	112	1.8571e+06	1.63775e+06	1.0422e+06	3.53699e+07	2.62971e+07	139.63	21.24	4	8	13.0872	21.76	4	7	168.01	18.13	3	6	14.6234	21.76	4	7	135.4	12.95	2	4	11.2877	21.76	4	6	178.483	22.28	5	10	19.1549	22.8	5	12	150.72	22.28	5	8	15.563	21.24
O60506-2	Isoform 2 of Heterogeneous nuclear ribonucleoprotein Q OS=Homo sapiens GN=SYNCRIP - [HNRPQ_HUMAN]	46.09	6	7	22	74	7.04105e+06	448792	2.32473e+06	2.04858e+07	1.08415e+07					0	8.16	3	4					4.95991	6.8	3	4					1.95625	16.84	6	8	21.65	1.7	1	1	2.46211	10.2	5	7	25.28	1.7	1	2	4.15977	7.82
Q99497	Protein DJ-1 OS=Homo sapiens GN=PARK7 PE=1 SV=2 - [PARK7_HUMAN]	46.03	1	3	6	38	0	0	640213	1.462e+07	1.42959e+07													2.09172	13.76	1	1					0	6.88	1	1	58.33	26.46	3	4	10.7347	34.92	4	5	105.47	18.52	2	5	16.4973	18.52
P52597	Heterogeneous nuclear ribonucleoprotein F OS=Homo sapiens GN=HNRNPF PE=1 SV=3 - [HNRPF_HUMAN]	46.02	3	5	16	93	3.67708e+06	4.26557e+06	5.15517e+06	7.89558e+07	86585749	140.03	8.19	2	4	23.8942	22.17	5	14	108.307	12.05	3	3	22.8461	22.65	7	12	171.813	12.05	3	6	25.7494	35.66	10	19					14.8674	8.67	3	12					8.61227	11.81
Q9Y394-2	Isoform 2 of Dehydrogenase/reductase SDR family member 7 OS=Homo sapiens GN=DHRS7 - [DHRS7_HUMAN]	46.02	3	6	15	102	1.02605e+07	6.94493e+06	6.06415e+06	1.872e+08	1.55372e+08	47.1362	7.27	2	3	3.70234	17.65	4	11	78.0265	7.27	2	3	10.3867	21.45	4	10	28.6187	11.42	2	3	6.94619	22.84	5	6	81.8715	15.22	3	5	17.4492	32.53	8	18	118.973	19.72	4	7	15.667	35.29
P02652	Apolipoprotein A-II OS=Homo sapiens GN=APOA2 PE=1 SV=1 - [APOA2_HUMAN]	46	1	3	6	30	1.50908e+07	0	0	1.51561e+08	1.41309e+08					0	9	1	1																	41.5469	19	2	4	10.4926	41	4	7	72.7521	19	2	4	9.50083	21
P29536-2	Isoform 2 of Leiomodin-1 OS=Homo sapiens GN=LMOD1 - [LMOD1_HUMAN]	45.98	3	8	30	138	1.25458e+06	5.49336e+06	1.89535e+06	1.88702e+07	2.26882e+07	50.15	9.44	4	4	10.5024	16.61	8	9	65.2233	14.51	7	9	17.6739	15.38	7	9	87.7267	10.49	6	7	12.913	18.01	9	14	96.9471	11.36	5	8	16.0585	16.96	8	12	96.9279	10.14	5	10	18.5091	18.18
P30040	Endoplasmic reticulum resident protein 29 OS=Homo sapiens GN=ERP29 PE=1 SV=4 - [ERP29_HUMAN]	45.98	3	5	13	64	1.07487e+06	734220	1.58049e+06	7.81443e+06	1.56587e+07	151.43	14.94	2	3	12.9787	32.57	6	8	43.63	5.75	1	2	5.10283	9.58	2	4	32.02	5.75	1	2	8.00405	19.16	4	6					1.81207	9.2	3	5					4.22635	12.64
Q9UL40	Zinc finger protein 346 OS=Homo sapiens GN=ZNF346 PE=1 SV=1 - [ZN346_HUMAN]	45.92	4	1	8	11	701569	334108	239086	1.64042e+07	1.88498e+07					1.63917	10.2	2	2					0	13.27	2	2					0	20.41	3	3					1.63578	3.74	1	1					0	8.16
E5RHW4	Uncharacterized protein OS=Homo sapiens GN=ERLIN2 PE=4 SV=1 - [E5RHW4_HUMAN]	45.86	6	3	13	43	2.42016e+06	747765	1.22238e+06	9.27955e+06	3.06923e+06	72.43	9.47	3	5	9.90693	16.57	4	6	68.68	3.55	1	2	5.83301	6.21	2	3	81.99	11.83	3	5	9.46198	17.75	5	7	48.18	8.58	3	3	6.4298	6.8	2	3					1.96366	9.17
F2Z2F2	Uncharacterized protein OS=Homo sapiens GN=RBP1 PE=3 SV=1 - [F2Z2F2_HUMAN]	45.86	3	1	8	13	727579	429999	0	72734878	3.26062e+07					0	3.82	1	1					0	8.92	2	2					0	12.1	2	2					0	11.46	2	2					0	10.19
F8VV61	Uncharacterized protein OS=Homo sapiens GN=TBC1D15 PE=4 SV=1 - [F8VV61_HUMAN]	45.83	1	1	3	5	0	0	0	8.10789e+06	2.38177e+07																													0	6.67	1	1					0	6.67
Q16666-2	Isoform 2 of Gamma-interferon-inducible protein 16 OS=Homo sapiens GN=IFI16 - [IF16_HUMAN]	45.82	6	4	24	45	847010	1.8908e+06	2.35093e+06	2.78215e+07	6.25644e+06					8.42272	14.13	6	6					0	6.31	4	4					1.68807	11.66	6	6					5.87691	24.14	9	14					1.68889	3.16
E9PAQ6	Uncharacterized protein OS=Homo sapiens GN=CCT3 PE=3 SV=1 - [E9PAQ6_HUMAN]	45.77	10	16	25	182	1.76578e+07	1.83679e+07	1.58604e+07	2.1691e+07	2.13748e+07	122.47	16.91	6	7	17.9274	20.04	7	15	101.83	14.52	4	5	16.8448	16.73	7	11	121.193	16.18	5	8	20.6498	19.3	7	13	409.943	23.53	10	19	46.2484	34.93	16	24	290.062	25.37	11	20	41.7368	29.41
P02763	Alpha-1-acid glycoprotein 1 OS=Homo sapiens GN=ORM1 PE=1 SV=1 - [A1AG1_HUMAN]	45.77	1	4	8	38	0	0	0	2.54069e+07	2.29177e+07																					1.72261	3.98	1	1	79.89	21.89	4	7	6.06816	21.89	4	8	66.17	19.4	4	8	6.13222	15.92
Q5RI15	Protein FAM36A OS=Homo sapiens GN=FAM36A PE=1 SV=2 - [FA36A_HUMAN]	45.76	2	1	4	10	0	802871	2.78258e+06	0	0													0	10.17	1	1					3.88395	45.76	4	4
Q07020	60S ribosomal protein L18 OS=Homo sapiens GN=RPL18 PE=1 SV=2 - [RL18_HUMAN]	45.74	6	5	11	58	524634	623525	629988	2.00378e+07	2.34526e+07	77.25	6.91	1	2	5.3269	10.11	2	3	66.06	10.64	2	3	5.54748	8.51	2	3	31.89	6.91	1	2	5.19715	6.91	1	2	58.0233	22.34	4	5	10.4023	26.06	5	8	145.61	20.74	4	6	12.4791	29.79
F8WDS6	Uncharacterized protein OS=Homo sapiens GN=EIF6 PE=4 SV=1 - [F8WDS6_HUMAN]	45.7	1	1	6	18	7.14426e+06	5.37854e+06	827778	6.57571e+06	0					0	15.05	3	5					0	5.38	2	3					0	22.04	3	4					0	5.38	2	2					0	3.76
P49257	Protein ERGIC-53 OS=Homo sapiens GN=LMAN1 PE=1 SV=2 - [LMAN1_HUMAN]	45.69	4	16	24	289	7.80872e+06	6.75164e+06	3.65859e+06	5.1158e+07	4.24095e+07	158.462	17.84	6	14	34.9325	26.08	8	17	101.601	17.65	7	10	23.7628	27.84	13	19	156.899	24.9	8	17	40.4271	29.02	10	20	515.135	26.86	12	27	71.0181	33.73	15	35	522.91	32.75	13	29	73.8827	37.65
Q8NBJ4	Golgi membrane protein 1 OS=Homo sapiens GN=GOLM1 PE=1 SV=1 - [GOLM1_HUMAN]	45.64	4	4	17	43	1.1465e+06	2.26934e+06	453301	3.99744e+07	3.05444e+07					0	4.99	1	3					0	15.21	4	5					0	6.48	3	3					0	7.23	2	2					0	3.99
P37108	Signal recognition particle 14 kDa protein OS=Homo sapiens GN=SRP14 PE=1 SV=2 - [SRP14_HUMAN]	45.59	1	3	7	37	1.88079e+07	2.43634e+07	8.42677e+06	1.3691e+08	2.17594e+08					2.00872	12.5	1	2	33.34	22.06	2	2	2.19254	22.06	2	2	101.54	10.29	1	2	2.06744	22.06	2	3	162.79	19.12	2	3	4.14681	21.32	2	3	150.95	10.29	1	2	1.79145	35.29
Q6UWY5	Olfactomedin-like protein 1 OS=Homo sapiens GN=OLFML1 PE=1 SV=2 - [OLFL1_HUMAN]	45.52	2	9	20	72	1966415	353850	936600	9.53356e+06	1.04904e+07	28.61	2.24	1	2	5.35662	8.96	3	5	66.65	9.2	3	4	11.6014	15.67	5	7	31.6033	6.97	3	5	10.6649	17.91	6	9	236.246	9.2	4	7	21.9489	19.65	8	12	134.53	11.44	5	5	12.4899	18.66
Q01105-2	Isoform 2 of Protein SET OS=Homo sapiens GN=SET - [SET_HUMAN]	45.49	5	6	11	65	2.43252e+06	7.01021e+06	3.3007e+06	1.70064e+06	6.82613e+06	29.32	3.61	1	2	4.84508	14.44	2	3	27.33	3.61	1	1	4.85472	13.72	3	4	27.9033	3.61	1	2	5.35886	15.16	3	4	49.9	5.42	1	1	4.37117	5.42	1	1	61.15	5.42	1	1	4.36758	11.91
E7EPA7	Uncharacterized protein OS=Homo sapiens GN=TKT PE=4 SV=1 - [E7EPA7_HUMAN]	45.48	6	12	22	132	1.04806e+06	1.41437e+06	625753	1.65934e+07	1.37519e+07	93.5667	6.02	3	5	14.0429	8.24	3	5	92.1667	6.34	2	4	15.8591	9.19	3	6	66.7133	6.34	2	3	14.0904	11.57	4	6	260.939	18.38	7	13	43.4731	25.67	8	14	211.521	13.47	6	10	26.7692	13.63
P01891	HLA class I histocompatibility antigen, A-68 alpha chain OS=Homo sapiens GN=HLA-A PE=1 SV=4 - [1A68_HUMAN]	45.48	5	1	14	136	3.8547e+06	7.52857e+06	4.09527e+06	4.73623e+07	5.59796e+07	161.142	14.52	4	9	24.1357	14.52	4	9	258.177	16.71	4	10	35.138	26.03	6	13	201.51	12.05	3	7	18.2693	12.05	3	8	323.271	12.6	4	13	44.2562	12.6	4	13	301.838	19.18	5	14	40.6782	19.18
F8WA45	Uncharacterized protein OS=Homo sapiens GN=GSN PE=4 SV=1 - [F8WA45_HUMAN]	45.45	10	1	32	569	1.4564e+07	1.4159e+07	7.3108e+06	1.36432e+08	1.11776e+08	940.927	34.41	18	46	136.56	37.48	22	53	1099.92	32.03	18	52	154.848	35.1	21	56	886.918	30.35	16	47	116.522	30.35	17	47	750.661	32.87	19	41	107.693	32.73	19	42	710.239	32.45	19	39	106.752	31.33
A5A3E0	POTE ankyrin domain family member F OS=Homo sapiens GN=POTEF PE=1 SV=2 - [POTEF_HUMAN]	45.4	22	1	37	920	2.92388e+08	2.86714e+08	1.93223e+08	3.41333e+09	3.1893e+09	1012.29	11.07	8	49	140.351	23.72	17	80	1205.79	8.47	7	53	154.159	18.33	14	72	1104.63	8.93	7	54	143.58	20.84	16	70	1232.8	10.33	9	64	166.637	20.09	15	79	1385.77	8.93	9	54	144.14	20.09
B7ZA26	Uncharacterized protein OS=Homo sapiens GN=GNAL PE=2 SV=1 - [B7ZA26_HUMAN]	45.4	1	1	10	43	1.21528e+06	1.08736e+06	801828	4.39304e+07	4.99502e+07	21.54	8.62	2	3	3.55423	8.62	2	3	34.54	4.6	1	2	3.46774	10.34	2	4	0	4.6	1	2	3.97831	10.34	2	3	27.93	4.6	1	2	1.97382	29.31	4	5	38.6545	4.6	1	2	4.31029	4.6
D6R9P3	Uncharacterized protein OS=Homo sapiens GN=HNRNPAB PE=4 SV=1 - [D6R9P3_HUMAN]	45.36	7	3	14	60	1.41877e+07	1.58795e+07	1.24672e+07	1.25868e+08	128989947					2.14035	18.21	5	8					2.03418	30	8	12					5.07834	13.21	3	4					3.34407	16.07	4	7					0	11.07
P35613-2	Isoform 2 of Basigin OS=Homo sapiens GN=BSG - [BASI_HUMAN]	45.35	4	1	10	85	209150	0	959276	3.31938e+07	3.04415e+07					1.7095	16.73	2	2					0	12.64	2	2					2.29254	6.69	1	1	140.539	22.68	5	10	24.2036	18.22	4	10	163.228	18.22	4	8	21.0767	18.22
Q9Y6C2	EMILIN-1 OS=Homo sapiens GN=EMILIN1 PE=1 SV=2 - [EMIL1_HUMAN]	45.28	2	22	37	447	5.88968e+06	5.134e+06	4.01203e+06	1.62926e+08	1.46728e+08	487.472	19.19	13	32	96.5712	19.88	13	37	656.856	18.41	13	31	96.3751	19.88	14	37	488.436	17.81	12	29	78.227	22.24	15	34	1091.84	27.85	22	48	129.988	30.41	24	52	1246.7	29.43	24	55	146.829	27.66
P52566	Rho GDP-dissociation inhibitor 2 OS=Homo sapiens GN=ARHGDIB PE=1 SV=3 - [GDIR2_HUMAN]	45.27	4	6	8	66	1.9566e+06	571477	592579	6.64597e+07	8.6442e+06	153.393	28.86	5	8	24.2803	29.35	6	11	107.4	21.89	3	4	18.1808	34.83	4	6	95.41	8.46	1	2	10.0321	8.46	1	2	91.74	18.91	3	4	11.2616	22.39	4	5	87.83	14.93	3	4	9.29339	31.84
Q9Y5L4	Mitochondrial import inner membrane translocase subunit Tim13 OS=Homo sapiens GN=TIMM13 PE=1 SV=1 - [TIM13_HUMAN]	45.26	1	2	4	26	0	620913	0	1.3041e+07	3.32061e+07													0	30.53	3	3									75.15	26.32	2	4	11.0448	26.32	2	4	33.5	11.58	1	2	4.13131	30.53
P19087	Guanine nucleotide-binding protein G(t) subunit alpha-2 OS=Homo sapiens GN=GNAT2 PE=1 SV=4 - [GNAT2_HUMAN]	45.2	6	1	12	69	3.08382e+06	3.66934e+06	2.5665e+06	8.93199e+07	6.89418e+07	91.8399	6.78	3	5	9.53156	6.78	3	6	84.7132	5.37	2	4	8.64921	23.73	5	7	61.33	5.37	2	4	11.6841	17.23	4	6	112.817	5.37	2	7	14.0945	13.28	4	9	109.614	5.37	2	6	14.7876	10.45
E9PNN6	Uncharacterized protein OS=Homo sapiens GN=ALDH3A1 PE=3 SV=1 - [E9PNN6_HUMAN]	45.2	10	5	13	40	0	2.20242e+07	0	0	2.58472e+08													0	13.13	2	2													0	6.31	1	1					0	11.36
Q00796	Sorbitol dehydrogenase OS=Homo sapiens GN=SORD PE=1 SV=4 - [DHSO_HUMAN]	45.1	1	4	11	22	0	637733	208493	0	8.53874e+06													0	4.2	1	1					0	12.61	2	2													2.01832	16.81
E5RGY4	Uncharacterized protein OS=Homo sapiens GN=IMPA1 PE=4 SV=1 - [E5RGY4_HUMAN]	45.02	9	1	10	27	0	1.59863e+06	812913	2.00283e+07	1.45896e+07					0	13.27	1	1					0	19.43	2	2					1.79339	29.86	4	5					0	30.33	4	5					1.74669	28.44
P23588	Eukaryotic translation initiation factor 4B OS=Homo sapiens GN=EIF4B PE=1 SV=2 - [IF4B_HUMAN]	45.01	9	3	33	99	4.05304e+06	2.09211e+07	1.58751e+06	1.57021e+08	8.5775e+07	105.294	5.73	3	4	6.85049	10.31	5	7	88.17	3.76	2	4	5.32159	10.15	5	7	74.11	5.24	3	4	5.57439	18.82	7	8	101.18	7.36	4	6	7.76784	12.6	6	9	78.56	3.93	2	4	8.28668	16.2
P01766	Ig heavy chain V-III region BRO OS=Homo sapiens PE=1 SV=1 - [HV305_HUMAN]	45	2	1	3	33	0	2.46383e+06	1.33355e+06	1.21192e+07	29159495	51.06	15.83	1	1	4.70587	25	2	2	84.56	15.83	1	2	8.52597	15.83	1	2	52.36	15.83	1	2	8.66199	15.83	1	2	128.775	15.83	1	2	11.1352	35.83	2	4	206.55	15.83	1	4	21.2614	15.83
C9JKG1	Uncharacterized protein OS=Homo sapiens GN=BGN PE=4 SV=1 - [C9JKG1_HUMAN]	44.96	1	1	11	123	1.60437e+06	1.1848e+06	1.50111e+06	3.28988e+07	1.85509e+07	248.07	19.75	4	8	21.4936	41.6	8	15	264.378	19.33	4	11	30.6024	33.61	6	15	238.454	22.69	5	12	23.8687	22.69	5	14	201.614	22.27	4	10	25.2432	33.19	5	13	122.658	15.97	2	6	18.508	31.09
P24752	Acetyl-CoA acetyltransferase, mitochondrial OS=Homo sapiens GN=ACAT1 PE=1 SV=1 - [THIL_HUMAN]	44.96	2	13	20	191	1.76774e+06	2.31763e+06	1.82146e+06	4.52107e+07	4.63129e+07	254.507	11.01	4	9	22.5935	14.52	6	12	302.109	24.36	10	16	33.3693	22.01	8	14	309.771	22.01	8	13	29.1926	23.89	9	14	227.137	16.16	5	10	28.8732	23.42	8	14	227.298	17.8	6	10	28.9116	22.72
Q562R1	Beta-actin-like protein 2 OS=Homo sapiens GN=ACTBL2 PE=1 SV=2 - [ACTBL_HUMAN]	44.95	1	5	19	1224	3.16161e+08	3.19197e+08	2.8399e+08	4736382904	4.43856e+09	1009.42	21.81	6	73	148.934	21.81	6	82	1309.72	15.96	5	76	160.906	22.07	6	81	1076.77	15.96	5	83	167.565	23.94	6	85	1234.67	16.76	7	88	165.219	31.91	11	101	1403.26	22.34	8	93	153.08	25
P00338	L-lactate dehydrogenase A chain OS=Homo sapiens GN=LDHA PE=1 SV=2 - [LDHA_HUMAN]	44.88	19	13	18	185	829414	1.10259e+06	717104	6.08343e+07	4.62442e+07	152.939	10.24	3	6	18.8485	14.46	4	7	213.165	19.88	6	9	24.585	24.7	7	12	142.78	24.7	7	10	26.795	24.7	7	13	246.284	22.59	8	16	23.487	27.41	9	18	255.489	25	9	17	26.0656	30.12
E5RJR5	Uncharacterized protein OS=Homo sapiens GN=SKP1 PE=4 SV=1 - [E5RJR5_HUMAN]	44.79	6	3	10	41	0	0	90201.3	2.86374e+07	9.04683e+06																					0	8.59	1	2					0	25.15	4	5					1.72175	22.7
Q15008	26S proteasome non-ATPase regulatory subunit 6 OS=Homo sapiens GN=PSMD6 PE=1 SV=1 - [PSMD6_HUMAN]	44.73	6	3	15	43	1.18807e+06	347319	0	9.89485e+07	8.94853e+06					0	5.4	1	1					0	5.66	1	1					1.98502	3.6	1	1	75.32	11.05	4	5	8.26696	12.6	3	4	126.95	6.68	2	4	11.3935	22.62
A8K3Z3	Proteasome (Prosome, macropain) 26S subunit, ATPase, 5, isoform CRA_b OS=Homo sapiens GN=PSMC5 PE=2 SV=1 - [A8K3Z3_HUMAN]	44.72	2	4	19	43	1.43619e+06	3.95057e+06	1.40402e+07	1.74916e+07	7.0864e+06					0	10.3	4	4					0	6.78	2	2					0	4.27	2	2					0	22.86	7	10					5.19219	18.34
Q9BPW8	Protein NipSnap homolog 1 OS=Homo sapiens GN=NIPSNAP1 PE=1 SV=1 - [NIPS1_HUMAN]	44.72	2	2	15	37	8.15531e+06	346754	0	3.1937e+08	4.69564e+06					1.80256	8.1	2	2	24.08	10.56	2	2	3.97536	19.37	3	3					0	2.82	1	1					0	8.8	2	4					0	2.11
P17706-2	Isoform PTPA of Tyrosine-protein phosphatase non-receptor type 2 OS=Homo sapiens GN=PTPN2 - [PTN2_HUMAN]	44.7	3	1	15	27	7.36433e+06	1.83909e+06	523682	9230913	1.34613e+08					0	10.34	2	2					2.46436	8.27	2	2					0	10.08	3	4					0	16.8	4	5					0	13.44
B7Z4T9	Chaperonin containing TCP1, subunit 7 (Eta), isoform CRA_c OS=Homo sapiens GN=CCT7 PE=2 SV=1 - [B7Z4T9_HUMAN]	44.69	8	14	20	136	936909	1.6856e+06	1.37973e+06	1.56809e+07	2.71583e+07	193.65	12.83	5	11	25.6667	18.04	7	14	189.047	12.83	5	10	24.9677	18.84	8	13	257.193	18.24	6	9	27.2427	20.24	7	10	130.026	15.23	6	10	21.1116	23.85	9	15	57.7334	9.22	4	8	18.2287	15.23
B7Z9I1	Uncharacterized protein OS=Homo sapiens GN=ACADM PE=2 SV=1 - [B7Z9I1_HUMAN]	44.68	7	4	15	34	485154	4.63947e+06	338787	1.00857e+07	4.18831e+06					0	12.99	4	4	59.9833	16.36	3	4	12.6938	24.68	7	9	27.14	3.9	1	1	6.36296	3.9	1	2					0	3.12	1	1					2.9786	14.29
Q9Y696	Chloride intracellular channel protein 4 OS=Homo sapiens GN=CLIC4 PE=1 SV=4 - [CLIC4_HUMAN]	44.66	7	3	9	25	0	166396	0	9.81711e+06	1.09305e+07									27.84	4.74	1	1	2.00997	4.74	1	1									42.1714	10.28	2	3	6.45181	16.6	3	4	35.06	7.11	2	4	4.85688	17.39
O43837-2	Isoform A of Isocitrate dehydrogenase [NAD] subunit beta, mitochondrial OS=Homo sapiens GN=IDH3B - [IDH3B_HUMAN]	44.65	3	4	10	15	654834	430972	240543	0	1.34785e+07					0	9.92	2	2					0	19.84	4	4					0	4.96	1	2													0	9.4
Q9UJU6	Drebrin-like protein OS=Homo sapiens GN=DBNL PE=1 SV=1 - [DBNL_HUMAN]	44.65	9	2	16	48	747363	730615	1.80665e+06	4.8362e+06	9.48731e+07					0	6.51	2	2					1.79816	3.72	1	2	28.17	2.33	1	2	4.31799	8.14	3	4					1.67813	14.88	5	5					0	10
D6R9Z7	Uncharacterized protein OS=Homo sapiens GN=COX7C PE=4 SV=1 - [D6R9Z7_HUMAN]	44.64	5	3	4	28	5.39185e+06	7.0193e+06	2.25945e+06	0	6.46475e+07	54.09	16.07	1	2	4.71819	32.14	2	3	49.89	16.07	1	2	4.04177	16.07	1	2	53.88	16.07	1	2	4.87378	16.07	1	2					0	16.07	1	1					0	28.57
P36542	ATP synthase subunit gamma, mitochondrial OS=Homo sapiens GN=ATP5C1 PE=1 SV=1 - [ATPG_HUMAN]	44.63	3	8	13	93	1.93686e+06	1.5803e+06	4.17781e+06	3.8518e+07	3.16905e+07	105.48	21.48	4	6	15.6395	23.83	5	8	158.19	15.1	4	8	16.8539	18.79	5	9	54.13	7.72	2	3	8.51991	14.43	4	7	95.5398	14.77	4	7	17.0976	19.13	5	9	120.847	17.79	5	8	15.5728	20.13
F5H098	Malate dehydrogenase OS=Homo sapiens GN=MDH1 PE=3 SV=1 - [F5H098_HUMAN]	44.6	8	11	19	208	3.84456e+06	2.5491e+06	1.40779e+06	6.05238e+07	5.35411e+07	109.75	13.92	4	6	18.1833	16.48	4	6	92.2567	9.38	2	4	15.7773	17.9	5	8	102.3	16.48	4	6	22.268	23.3	6	9	312.424	27.84	8	18	46.7961	30.68	9	19	312.006	29.83	9	18	43.1193	28.98
Q8NC51-3	Isoform 3 of Plasminogen activator inhibitor 1 RNA-binding protein OS=Homo sapiens GN=SERBP1 - [PAIRB_HUMAN]	44.53	4	7	14	36	1.62777e+06	0	0	0	9.95196e+06					0	2.8	1	1													0	5.09	1	1					0	6.11	1	1					0	11.96
P37837	Transaldolase OS=Homo sapiens GN=TALDO1 PE=1 SV=2 - [TALDO_HUMAN]	44.51	2	11	21	100	1.45681e+07	1.60324e+07	1.78987e+06	1.37821e+08	1.61321e+08					0	20.18	6	7					1.77464	16.32	5	5					1.62133	8.01	3	3	104.64	19.58	6	11	20.6009	27.3	10	16	59.1	12.17	4	6	14.3229	23.44
Q9NQC3-2	Isoform 2 of Reticulon-4 OS=Homo sapiens GN=RTN4 - [RTN4_HUMAN]	44.5	8	8	11	160	1.96996e+06	2.59023e+06	3.43045e+06	1.04012e+08	9.81647e+07	379.02	23.06	5	12	41.9362	23.06	5	12	354.362	23.06	5	13	47.6939	23.06	5	14	229.464	22.79	5	13	43.3736	22.79	5	13	226.658	25.74	7	17	43.2318	28.69	8	18	234.753	25.74	7	16	38.652	40.75
Q05707-2	Isoform 2 of Collagen alpha-1(XIV) chain OS=Homo sapiens GN=COL14A1 - [COEA1_HUMAN]	44.44	9	49	58	964	1.59873e+07	1.77231e+07	1.28591e+07	1.06202e+08	1.11078e+08	1830.96	29.27	40	97	278.94	30.96	42	105	1866.11	28.15	38	90	261.284	29.1	40	96	1682.39	27.64	37	87	253.089	28.43	39	96	1101.14	25.56	34	73	192.697	30.84	39	87	1301.14	27.58	35	70	203.487	30.79
Q96I99	Succinyl-CoA ligase [GDP-forming] subunit beta, mitochondrial OS=Homo sapiens GN=SUCLG2 PE=1 SV=2 - [SUCB2_HUMAN]	44.44	5	15	21	251	1.08725e+06	1.71337e+06	1.33626e+06	3.14363e+07	5.1098e+07	136.075	14.81	6	9	18.5394	19.91	9	12	134.342	14.35	6	11	23.3108	14.12	5	11	114.09	19.68	7	10	21.3623	19.91	8	11	417.209	30.56	12	24	49.2025	33.1	14	27	418.008	32.87	13	26	56.0681	37.04
F5H479	Uncharacterized protein OS=Homo sapiens GN=LAMTOR1 PE=4 SV=1 - [F5H479_HUMAN]	44.44	4	2	3	9	0	0	0	34318618	2.32221e+07													0	20.2	1	1													0	11.11	1	1					4.54596	11.11
Q15046-2	Isoform Mitochondrial of Lysyl-tRNA synthetase OS=Homo sapiens GN=KARS - [SYK_HUMAN]	44.32	3	3	23	40	4.02492e+06	0	0	1.35562e+07	5.25523e+06					0	2.24	1	1					0	2.56	1	1					0	2.4	1	1	21.99	2.08	1	1	1.69719	12.64	5	6	20.81	2.08	1	2	5.17506	18.72
Q13185	Chromobox protein homolog 3 OS=Homo sapiens GN=CBX3 PE=1 SV=4 - [CBX3_HUMAN]	44.26	3	4	14	89	2.91577e+06	3.21876e+06	2.30406e+06	3.67776e+06	1.08549e+07	179.403	29.51	4	7	18.7569	29.51	4	8	239.281	29.51	5	9	29.2059	30.05	6	12	115.687	20.77	3	6	17.2611	31.15	5	11	63.68	13.66	2	4	10.0507	13.66	2	4	87.9567	13.66	2	4	11.4741	30.05
Q9HAV7	GrpE protein homolog 1, mitochondrial OS=Homo sapiens GN=GRPEL1 PE=1 SV=2 - [GRPE1_HUMAN]	44.24	7	5	9	40	6.58495e+06	7.26089e+06	0	0	0					2.12986	21.66	4	4					0	11.52	2	2																					0	11.98
Q8N128	Protein FAM177A1 OS=Homo sapiens GN=FAM177A1 PE=1 SV=1 - [F177A_HUMAN]	44.13	2	1	11	27	0	0	0	3.63208e+06	5.65646e+06					0	11.27	2	2					0	12.21	2	2					0	8.45	1	1					0	7.98	2	3					0	4.69
P28838	Cytosol aminopeptidase OS=Homo sapiens GN=LAP3 PE=1 SV=3 - [AMPL_HUMAN]	44.12	2	7	18	70	0	0	318444	3.60683e+07	3.3881e+07					0	4.43	2	2					3.74195	10.98	3	4					1.61326	14.07	4	8					0	12.33	4	8					0	6.94
P63218	Guanine nucleotide-binding protein G(I)/G(S)/G(O) subunit gamma-5 OS=Homo sapiens GN=GNG5 PE=1 SV=3 - [GBG5_HUMAN]	44.12	1	1	4	18	0	3.50983e+06	1.00432e+06	1.932e+07	3.81875e+07					1.80034	13.24	1	2					3.26052	30.88	2	3	33.91	13.24	1	2	4.00546	13.24	1	2	37.33	16.18	2	3	3.8895	13.24	1	2					0	17.65
C9JCF6	Uncharacterized protein OS=Homo sapiens GN=LIAS PE=3 SV=1 - [C9JCF6_HUMAN]	44.07	2	1	11	15	331164	0	1.12933e+06	2.15187e+07	0					0	3.65	1	1					0	8.81	1	1					0	16.72	3	3					0	31.91	7	8
Q03013	Glutathione S-transferase Mu 4 OS=Homo sapiens GN=GSTM4 PE=1 SV=3 - [GSTM4_HUMAN]	44.04	8	1	7	34	0	0	3.59834e+07	9.42489e+06	1.04651e+07													2.33269	8.72	1	2					2.16768	17.43	2	3	23.17	3.21	1	1	1.68928	11.93	2	5	30.8467	8.72	2	3	9.90694	21.56
P01871	Ig mu chain C region OS=Homo sapiens GN=IGHM PE=1 SV=3 - [IGHM_HUMAN]	44.03	3	14	18	332	4.53893e+06	4.89688e+06	4.0142e+06	2.07839e+08	1.81125e+08	172.932	16.59	7	13	24.8185	21.24	9	16	195.134	16.37	7	12	20.0048	19.47	8	13	165.989	14.82	6	12	27.1324	19.25	7	14	493.325	30.97	13	41	80.7533	30.97	13	49	479.285	30.97	13	40	82.9731	36.28
P35659	Protein DEK OS=Homo sapiens GN=DEK PE=1 SV=1 - [DEK_HUMAN]	44	4	1	16	33	848825	1.97244e+06	3.01937e+06	1.36923e+07	1.44726e+08					2.22338	2.67	1	1					5.83618	4.8	2	6					0	10.4	3	3	24.41	4.53	2	3	3.68618	9.87	3	4	25.6	5.07	2	3	0	18.67
Q969E4	Transcription elongation factor A protein-like 3 OS=Homo sapiens GN=TCEAL3 PE=1 SV=1 - [TCAL3_HUMAN]	44	1	1	5	24	0	0	0	5.7136e+06	1.70271e+07																									47.69	12	1	3	7.48757	17	2	4	65.6267	12	1	4	11.9638	21
Q9H115	Beta-soluble NSF attachment protein OS=Homo sapiens GN=NAPB PE=1 SV=2 - [SNAB_HUMAN]	43.96	4	2	12	27	6.19007e+06	6.09219e+06	2.79098e+06	3.34953e+07	1.37883e+07					0	4.36	1	1					1.744	4.7	2	2					0	16.78	4	5					0	22.48	5	7	39.89	7.72	1	1	4.44367	13.09
B4DME8	Uncharacterized protein OS=Homo sapiens GN=DDX1 PE=2 SV=1 - [B4DME8_HUMAN]	43.95	3	5	21	63	6.10324e+06	1.26458e+06	1.14875e+06	1.87438e+07	5.22484e+06	31.78	3.59	2	2	3.87329	8.66	4	4	51.1358	1.8	1	2	6.12577	15.36	7	8	58.3378	6.7	3	4	5.95673	12.75	4	5					3.32673	14.54	5	7					3.45434	9.8
P14868	Aspartyl-tRNA synthetase, cytoplasmic OS=Homo sapiens GN=DARS PE=1 SV=2 - [SYDC_HUMAN]	43.91	4	5	20	71	5.13884e+06	4.20568e+06	3.02579e+06	8.64459e+07	5.23777e+07	32.82	5.59	2	2	6.78905	15.77	5	8					3.56073	15.57	6	7	53.98	5.59	2	3	12.4912	12.38	4	8	51.2223	4.79	3	4	5.50498	17.17	7	9	115.687	8.38	4	6	8.73455	22.36
C9JXX5	Uncharacterized protein C11orf94 OS=Homo sapiens GN=C11orf94 PE=4 SV=1 - [CK094_HUMAN]	43.88	1	1	2	5	0	0	0	3.55479e+07	2.83488e+07																													0	15.31	1	2					0	15.31
P48444	Coatomer subunit delta OS=Homo sapiens GN=ARCN1 PE=1 SV=1 - [COPD_HUMAN]	43.84	5	5	18	55	700685	811916	287470	2.49851e+07	1.83814e+07					0	2.94	2	3					0	4.7	1	1	58.89	2.35	1	2	5.17822	10.57	3	4					1.63165	8.02	3	3	114.73	3.91	2	3	5.76144	14.48
P13639	Elongation factor 2 OS=Homo sapiens GN=EEF2 PE=1 SV=4 - [EF2_HUMAN]	43.82	14	24	44	326	2.04872e+06	2.3341e+06	2.89628e+06	6.30717e+07	6.25318e+07	140.18	8.62	7	12	25.0616	10.37	8	14	204.26	10.72	9	15	34.3836	10.72	10	18	154.91	8.74	7	8	21.0468	19.23	12	16	263.401	18.3	16	33	63.5147	26.69	23	43	246.486	19.58	17	31	50.0525	23.54
P46459	Vesicle-fusing ATPase OS=Homo sapiens GN=NSF PE=1 SV=3 - [NSF_HUMAN]	43.82	3	8	25	61	2.44477e+06	360589	482659	1.90332e+08	1.86656e+07					0	4.17	1	1					1.99387	2.82	2	2					2.20181	8.6	4	4					5.31788	11.69	6	7	31.62	6.72	4	5	12.1689	20.16
F8W818	Uncharacterized protein OS=Homo sapiens GN=GNA13 PE=4 SV=1 - [F8W818_HUMAN]	43.75	5	1	11	47	6.62584e+06	7.594e+06	3.66682e+06	1.80197e+08	1.10823e+08	91.7574	3.13	1	2	5.97732	22.44	4	5	71.7974	3.13	1	2	5.18147	15.91	3	4	61.33	3.13	1	2	5.96658	12.5	3	4	109.12	3.13	1	5	12.1207	3.13	1	5	93.31	3.13	1	4	10.4773	12.5
P49588	Alanyl-tRNA synthetase, cytoplasmic OS=Homo sapiens GN=AARS PE=1 SV=2 - [SYAC_HUMAN]	43.7	2	6	30	66	5.60158e+06	1.46006e+07	1.86437e+06	5.84587e+07	3.79733e+07	0	1.03	1	3	3.74288	8.26	4	5	0	1.03	1	2	1.64321	9.09	5	5					0	10.02	7	7					4.74357	7.95	5	5	36.34	2.69	2	3	7.16545	13.33
P00915	Carbonic anhydrase 1 OS=Homo sapiens GN=CA1 PE=1 SV=2 - [CAH1_HUMAN]	43.68	12	7	8	72	1.21918e+06	3.95827e+06	2.86316e+06	1.15574e+08	7.39285e+07	93.56	16.09	3	6	13.4027	18.77	4	7	140.04	20.69	4	9	25.526	27.97	5	11	123.66	16.09	3	5	14.8855	20.69	4	7					0	4.6	1	1	129.806	8.05	2	3	8.16967	8.05
Q14320	Protein FAM50A OS=Homo sapiens GN=FAM50A PE=1 SV=2 - [FA50A_HUMAN]	43.66	2	1	14	27	5.18627e+06	1.94797e+06	3.63694e+06	5.62897e+07	2.79918e+07					3.27246	20.35	4	5					2.12205	17.11	4	4					1.87506	7.96	2	2					0	10.32	2	4					1.67245	10.03
P49773	Histidine triad nucleotide-binding protein 1 OS=Homo sapiens GN=HINT1 PE=1 SV=2 - [HINT1_HUMAN]	43.65	1	2	3	4	0	0	0	0	1.95877e+06																													0	19.05	1	1					2.98467	19.05
P01857	Ig gamma-1 chain C region OS=Homo sapiens GN=IGHG1 PE=1 SV=1 - [IGHG1_HUMAN]	43.64	1	4	12	250	4.9931e+06	5.98152e+06	4.02793e+06	2.75616e+08	2.29673e+08	269.617	23.03	5	13	33.5899	28.79	7	19	218.516	18.79	5	11	27.6643	22.12	6	15	194.613	19.7	5	12	28.7667	32.73	9	16	295.791	30	7	17	43.7711	34.85	9	21	400.079	32.42	8	24	56.0193	34.85
P20618	Proteasome subunit beta type-1 OS=Homo sapiens GN=PSMB1 PE=1 SV=2 - [PSB1_HUMAN]	43.57	1	3	9	32	0	0	0	8.35052e+06	1.59779e+07																									44.97	8.3	1	1	3.91249	22.41	4	4	34.85	8.3	1	1	2.96654	25.73
Q9H2U2-2	Isoform 2 of Inorganic pyrophosphatase 2, mitochondrial OS=Homo sapiens GN=PPA2 - [IPYR2_HUMAN]	43.55	10	6	15	57	2.65372e+06	1.99152e+06	1.33198e+06	1.82723e+07	0	21.46	3.72	1	1	2.69606	6.88	2	2	23.37	3.72	1	1	2.37754	11.46	3	3	23.47	3.72	1	1	2.17276	16.91	4	4					0	11.75	3	3
P25788-2	Isoform 2 of Proteasome subunit alpha type-3 OS=Homo sapiens GN=PSMA3 - [PSA3_HUMAN]	43.55	2	4	13	36	0	1.10481e+06	0	1.06273e+08	7.85992e+06													0	3.63	1	1					0	3.23	1	1					1.8961	7.66	2	3					0	8.87
B8ZZL3	Uncharacterized protein OS=Homo sapiens GN=EIF4E2 PE=3 SV=1 - [B8ZZL3_HUMAN]	43.5	8	1	7	25	0	204210	0	6022387	2.65213e+06					0	13	1	1					0	13.5	1	1													0	9	2	3					1.8422	8.5
C0H5W9	SNX6 protein OS=Homo sapiens GN=SNX6 PE=2 SV=1 - [C0H5W9_HUMAN]	43.45	3	2	10	18	0	347524	4.59455e+06	9060606	1.2745e+07					0	3.45	1	1					0	5.86	1	1					0	6.21	2	2					0	10	2	2					3.61046	7.93
Q9BX97	Plasmalemma vesicle-associated protein OS=Homo sapiens GN=PLVAP PE=2 SV=1 - [PLVAP_HUMAN]	43.44	1	8	26	97	3.39339e+06	0	1.68987e+06	4.00528e+07	3.11358e+07	24.61	2.26	1	2	7.39681	6.56	2	4					0	2.04	1	1					1.6474	6.11	3	4	191.259	18.78	9	18	23.7116	30.32	12	20	127.844	15.38	7	14	22.8216	22.85
P50552	Vasodilator-stimulated phosphoprotein OS=Homo sapiens GN=VASP PE=1 SV=3 - [VASP_HUMAN]	43.42	1	4	13	51	811726	1.24738e+06	2.18807e+06	6.82525e+06	7.86595e+06					5.04624	18.42	5	8	0	3.16	1	2	1.77219	8.42	3	4					0	11.84	2	2	52.88	6.32	2	4	8.6991	10.79	3	5	37.42	10	3	4	9.97503	19.74
O95716	Ras-related protein Rab-3D OS=Homo sapiens GN=RAB3D PE=1 SV=1 - [RAB3D_HUMAN]	43.38	32	5	9	88	2.40129e+06	2.56785e+06	2.43648e+06	6.84931e+07	6.06931e+07	248.325	27.4	4	7	22.0226	27.4	4	7	149.87	18.72	3	4	11.9637	18.72	3	4	219.39	18.72	3	6	19.365	19.18	4	7	199.88	18.72	3	7	17.3857	18.72	3	7	197.934	11.87	2	7	17.6063	16.89
P51571	Translocon-associated protein subunit delta OS=Homo sapiens GN=SSR4 PE=1 SV=1 - [SSRD_HUMAN]	43.35	2	4	8	158	3.86284e+06	4.23521e+06	2.86348e+06	5.54328e+07	1.12939e+08	124.97	30.06	5	10	22.8503	35.84	5	10	162.452	35.84	6	13	32.53	35.84	6	14	136.469	32.37	5	9	23.0326	35.84	5	11	166.882	35.84	6	14	28.1383	43.35	6	14	130.69	35.84	6	15	26.8047	43.35
Q8IZ81	ELMO domain-containing protein 2 OS=Homo sapiens GN=ELMOD2 PE=1 SV=1 - [ELMD2_HUMAN]	43.34	2	1	8	17	2.85578e+06	2.40211e+06	1.91469e+06	17127157	4.79262e+07					1.7943	20.48	4	4					1.70897	17.75	3	3					0	3.75	1	2					0	3.75	1	1					0	8.19
Q9UHQ9	NADH-cytochrome b5 reductase 1 OS=Homo sapiens GN=CYB5R1 PE=1 SV=1 - [NB5R1_HUMAN]	43.28	1	6	11	41	0	0	1.4538e+06	11312106	1.12711e+07									34.1	2.95	1	2	3.48405	2.95	1	2					2.16035	9.51	3	3	28.54	5.57	2	3	5.55622	12.79	4	5	19.35	11.48	3	5	1.91902	11.48
P61457	Pterin-4-alpha-carbinolamine dehydratase OS=Homo sapiens GN=PCBD1 PE=1 SV=2 - [PHS_HUMAN]	43.27	1	1	5	7	0	0	525437	31321419	1.52561e+07																					0	15.38	2	3					0	13.46	1	1					1.83139	20.19
F5H157	Uncharacterized protein OS=Homo sapiens GN=RAB35 PE=3 SV=1 - [F5H157_HUMAN]	43.24	36	3	9	80	2.57066e+06	2.72335e+06	2.03385e+06	1.11998e+08	1.4494e+08	136.311	20	3	5	11.6101	20	3	5	130.981	20	3	6	15.5328	36.22	5	8	136.964	20	3	6	15.1487	20	3	6	97.7857	11.89	2	6	11.3531	12.97	3	8	113.127	11.89	2	7	15.5471	18.92
P61626	Lysozyme C OS=Homo sapiens GN=LYZ PE=1 SV=1 - [LYSC_HUMAN]	43.24	2	5	8	124	12472416	1.34628e+07	1.04686e+07	7.65119e+07	7.19896e+07	157.433	24.32	4	9	14.3641	24.32	4	11	194.358	24.32	4	11	21.2944	34.46	6	16	120.453	24.32	4	10	17.9139	24.32	4	10	199.051	28.38	5	9	17.5675	43.24	7	14	172.344	28.38	5	9	16.7733	35.14
P32969	60S ribosomal protein L9 OS=Homo sapiens GN=RPL9 PE=1 SV=1 - [RL9_HUMAN]	43.23	4	3	6	22	0	1.16082e+06	0	4.31321e+06	0	42.91	5.21	1	2	5.2245	15.1	2	3	59.47	5.21	1	2	6.64957	15.1	2	3	43.43	5.21	1	2	7.02018	19.27	2	3					0	8.85	1	1
Q9BY50	Signal peptidase complex catalytic subunit SEC11C OS=Homo sapiens GN=SEC11C PE=1 SV=3 - [SC11C_HUMAN]	43.23	2	7	8	104	730749	5.77096e+06	5.62108e+06	3.74971e+07	4.44735e+07	92.01	16.15	3	5	16.9132	16.15	3	5	131.92	25	5	6	18.7217	35.42	6	7	194.201	25	5	9	31.3627	25	5	9	175.706	23.44	4	9	21.3979	23.44	4	8	216.492	23.44	4	9	25.1793	38.02
P38159	Heterogeneous nuclear ribonucleoprotein G OS=Homo sapiens GN=RBMX PE=1 SV=3 - [HNRPG_HUMAN]	43.22	7	3	17	41	2.60563e+06	1.44262e+06	0	766085	2.81547e+07					1.62447	6.65	2	2					0	18.93	4	4													0	6.14	1	3					0	20.72
P09467	Fructose-1,6-bisphosphatase 1 OS=Homo sapiens GN=FBP1 PE=1 SV=5 - [F16P1_HUMAN]	43.2	3	6	13	67	6.73739e+06	480479	1.15579e+06	6.51988e+07	5.59264e+07					0	8.88	2	4					0	6.8	2	3					0	11.54	2	2					0	8.88	2	3					0	15.09
Q86V81	THO complex subunit 4 OS=Homo sapiens GN=THOC4 PE=1 SV=3 - [THOC4_HUMAN]	43.19	2	1	8	23	0	0	728963	1.95367e+07	2.46476e+07					0	4.67	1	2					0	4.67	1	1					0	5.06	1	1					3.41229	23.35	4	5					0	19.07
C9JG87	Uncharacterized protein OS=Homo sapiens GN=MRPL39 PE=4 SV=1 - [C9JG87_HUMAN]	43.1	3	1	11	27	1.51704e+06	1.39191e+06	772729	8.40762e+06	12415853					0	22.22	6	8					2.22693	22.56	5	5					0	17.85	4	6					0	7.07	2	2					0	4.04
Q9Y678	Coatomer subunit gamma OS=Homo sapiens GN=COPG PE=1 SV=1 - [COPG_HUMAN]	43.02	5	11	32	84	675750	3.12757e+07	462702	7.03817e+06	3.96687e+07					0	7.55	2	3	67.9	2.4	2	2	4.37958	9.61	5	5					1.72227	7.09	4	5					1.78928	7.78	4	4	49.53	2.06	2	3	4.87449	10.41
P19404	NADH dehydrogenase [ubiquinone] flavoprotein 2, mitochondrial OS=Homo sapiens GN=NDUFV2 PE=1 SV=2 - [NDUV2_HUMAN]	42.97	2	5	11	55	0	1.90881e+06	779439	2.21891e+07	1.46374e+07									33.84	3.21	1	2	4.15654	8.03	2	3					4.70759	11.24	3	3	56.1145	4.02	1	2	5.42039	9.64	2	3	65.993	4.02	1	2	5.80737	14.86
O95139	NADH dehydrogenase [ubiquinone] 1 beta subcomplex subunit 6 OS=Homo sapiens GN=NDUFB6 PE=1 SV=3 - [NDUB6_HUMAN]	42.97	2	3	5	24	0	0	394429	0	1.13578e+06																					0	21.09	1	1					2.34144	14.06	1	1					0	6.25
O00231	26S proteasome non-ATPase regulatory subunit 11 OS=Homo sapiens GN=PSMD11 PE=1 SV=3 - [PSD11_HUMAN]	42.89	1	4	18	47	1.38379e+06	0	0	4.34705e+06	6.19598e+06					0	9.72	3	4					0	5.21	1	1					0	3.08	1	1	46.12	6.16	2	3	6.90395	15.17	6	7	35.61	6.16	2	3	7.10948	8.77
P48643	T-complex protein 1 subunit epsilon OS=Homo sapiens GN=CCT5 PE=1 SV=1 - [TCPE_HUMAN]	42.88	7	10	21	100	1.36404e+06	1.39192e+06	626497	3.31958e+07	2.6817e+07	106.27	8.13	3	3	10.9474	21.81	8	8	205.75	15.53	5	7	17.1938	16.45	5	7	24.57	4.62	1	1	1.78696	14.79	5	5	100.48	12.94	5	8	22.829	22.74	10	15	65.03	9.98	4	7	9.69376	15.71
P01700	Ig lambda chain V-I region HA OS=Homo sapiens PE=1 SV=1 - [LV102_HUMAN]	42.86	1	1	4	16	2.30658e+06	0	0	1.29484e+07	2.529e+07					0	13.39	1	2																					0	35.71	3	4					0	13.39
P78310-5	Isoform 5 of Coxsackievirus and adenovirus receptor OS=Homo sapiens GN=CXADR - [CXAR_HUMAN]	42.86	6	2	7	15	1.50949e+06	1357473	1.666e+06	3.16225e+06	8363377					0	16.67	2	3					0	12.7	1	1					0	4.76	1	1					1.64057	10.71	2	3					0	3.57
E9PKP7	Uncharacterized protein OS=Homo sapiens GN=UBTF PE=4 SV=1 - [E9PKP7_HUMAN]	42.82	3	1	36	84	5.44439e+06	8.15115e+06	1.16113e+06	1.05241e+08	1.11383e+08					6.23798	12.21	6	9	0	2.01	2	3	6.26527	14.77	8	13	0	3.49	1	1	0	5.77	4	5					0	7.52	6	7					1.74766	20.27
C9J9K3	Uncharacterized protein OS=Homo sapiens GN=RPSA PE=3 SV=1 - [C9J9K3_HUMAN]	42.8	4	8	9	137	2.41085e+06	2.9313e+06	2.22613e+06	4.38877e+07	4.37852e+07	162.452	29.55	5	9	27.3219	33.71	6	10	267.088	23.86	5	10	30.9017	23.86	5	10	126.402	20.83	4	8	24.3474	20.83	4	8	357.828	38.64	8	16	47.6826	38.64	8	17	237.11	32.95	6	11	33.8768	32.95
P61009	Signal peptidase complex subunit 3 OS=Homo sapiens GN=SPCS3 PE=1 SV=1 - [SPCS3_HUMAN]	42.78	1	4	7	61	980766	1.07792e+06	1.38559e+06	6.68598e+07	7.30614e+07	118.67	12.78	2	3	9.69226	12.78	2	4	120.61	12.78	2	4	13.3469	12.78	2	4	103.41	10.56	2	3	7.34224	10.56	2	3	108.97	11.67	2	4	10.7809	32.78	4	6	109.35	11.67	2	5	13.7582	11.67
B4DDC6	Uncharacterized protein OS=Homo sapiens GN=PTGES3 PE=2 SV=1 - [B4DDC6_HUMAN]	42.74	4	1	5	16	1.40019e+06	1.63167e+06	1.14958e+06	1.72303e+07	1.39899e+07					0	5.65	1	1					0	5.65	1	2					1.74702	17.74	2	3					0	20.97	3	3					0	34.68
Q02218	2-oxoglutarate dehydrogenase, mitochondrial OS=Homo sapiens GN=OGDH PE=1 SV=3 - [ODO1_HUMAN]	42.72	11	16	39	191	5.82642e+06	5.26002e+06	1.32137e+06	3.78354e+07	4.53335e+07	56.3733	3.91	3	6	14.8226	9.29	7	11	132.166	9.97	6	10	33.1089	16.91	12	23	121.455	9.58	7	13	32.2713	12.9	9	20	119.537	8.02	8	13	26.3773	17.2	14	19	109.155	9.87	9	15	26.178	20.33
P54920	Alpha-soluble NSF attachment protein OS=Homo sapiens GN=NAPA PE=1 SV=3 - [SNAA_HUMAN]	42.71	1	6	11	51	377856	2.71043e+06	0	1.85816e+07	1.75261e+07					1.69624	18.64	3	3					0	10.51	2	2					2.05519	9.49	2	3	133.16	23.05	4	5	15.8982	26.78	6	7	126.5	30.85	5	5	18.4955	34.58
C9JVQ0	Uncharacterized protein OS=Homo sapiens GN=SNRPG PE=4 SV=1 - [C9JVQ0_HUMAN]	42.71	6	2	2	9	0	0	0	2.73258e+06	9.47128e+07																													0	7.29	1	1					3.07517	42.71
P11678	Eosinophil peroxidase OS=Homo sapiens GN=EPX PE=1 SV=2 - [PERE_HUMAN]	42.66	6	17	29	168	1.11491e+06	737802	321605	9.86899e+07	9.11496e+07					0	3.78	2	2					0	9.51	5	5	33.29	1.4	1	1	4.23819	1.4	1	2	515.004	26.15	18	39	72.4069	25.31	17	36	544.837	25.73	20	40	65.1314	23.08
P60059	Protein transport protein Sec61 subunit gamma OS=Homo sapiens GN=SEC61G PE=2 SV=1 - [SC61G_HUMAN]	42.65	1	2	3	21	0	0	1.05759e+06	9.99097e+06	1.08111e+07					0	23.53	1	1					0	23.53	1	1					0	17.65	1	1	20.82	19.12	1	1	4.52751	36.76	2	3					5.35524	42.65
O95561	Uncharacterized protein C1orf105 OS=Homo sapiens GN=C1orf105 PE=1 SV=1 - [CA105_HUMAN]	42.62	2	1	7	23	1.39469e+07	5.43844e+06	1.40786e+07	1.60546e+07	1.6298e+07					0	14.21	1	4					0	32.24	3	4					0	14.21	2	4					0	21.31	3	3					1.83283	14.21
E7ENN9	Uncharacterized protein OS=Homo sapiens GN=HLA-E PE=3 SV=1 - [E7ENN9_HUMAN]	42.61	6	1	12	84	4.55392e+06	4.06679e+06	4.1773e+06	55016855	5.77476e+07	152.282	13.53	4	6	22.3904	18.55	6	11	119.662	10.03	3	6	20.674	15.29	5	9	195.659	13.53	4	7	22.182	21.55	5	8	100.16	7.27	2	4	14.8448	14.04	4	7	108.65	7.27	2	5	20.137	24.31
P01614	Ig kappa chain V-II region Cum OS=Homo sapiens PE=1 SV=1 - [KV201_HUMAN]	42.61	5	1	6	43	2.53073e+06	3.32608e+06	2.00649e+06	58544883	42010365	79.8959	17.39	2	5	6.80826	32.17	4	7	73.4659	17.39	2	4	5.41831	42.61	3	5	44.8267	17.39	2	3	4.33626	32.17	3	6	61.71	11.3	1	2	5.15774	11.3	1	3	58.8514	11.3	1	2	4.86083	21.74
B4DUX6	Uncharacterized protein OS=Homo sapiens GN=CNN1 PE=2 SV=1 - [B4DUX6_HUMAN]	42.6	3	4	12	48	1.24385e+06	1.36413e+06	1.60212e+06	3.91179e+07	1.11812e+07	33.3533	10.11	2	3	4.95597	10.11	2	3	39.34	17.69	3	3	7.35185	20.22	4	4	30.8	13	3	4	6.93201	17.33	4	5					0	12.27	3	3	48.14	10.47	2	3	7.96101	18.41
P28074	Proteasome subunit beta type-5 OS=Homo sapiens GN=PSMB5 PE=1 SV=3 - [PSB5_HUMAN]	42.59	2	1	7	12	0	0	0	7.15237e+06	2.22581e+07					0	25.1	2	3													0	6.08	1	1					0	6.08	1	1					0	13.69
F5H0D0	Uncharacterized protein OS=Homo sapiens GN=EIF2B1 PE=3 SV=1 - [F5H0D0_HUMAN]	42.57	3	1	8	15	635896	2.05391e+06	1.76811e+06	1.61609e+07	1.657e+07					0	2.97	1	1					0	2.97	1	1					0	7.43	2	2					1.73301	28.22	4	4					0	14.36
P62753	40S ribosomal protein S6 OS=Homo sapiens GN=RPS6 PE=1 SV=1 - [RS6_HUMAN]	42.57	3	4	14	44	0	491572	1.04144e+06	7.10847e+06	2.20199e+07									21.31	6.02	1	1	2.9301	6.02	1	1					0	18.47	3	3	110.09	10.04	2	5	9.92392	10.04	2	5	93.81	10.04	2	3	7.38	26.1
Q5T8U7	Surfeit 4 OS=Homo sapiens GN=SURF4 PE=2 SV=1 - [Q5T8U7_HUMAN]	42.55	7	4	7	38	1.50278e+06	2.10667e+06	1.40411e+06	4.18892e+07	3.52137e+07	98.7367	14.89	2	3	4.28171	5.32	1	2					3.72673	5.32	1	2	86.4267	14.89	2	3	3.86841	5.32	1	2	131.82	19.68	3	5	9.31411	15.43	3	5	167.632	28.19	4	6	13.0718	18.62
P35237	Serpin B6 OS=Homo sapiens GN=SERPINB6 PE=1 SV=3 - [SPB6_HUMAN]	42.55	2	1	14	23	2.53215e+06	978366	3.0352e+06	7.00123e+06	2.37845e+07					0	14.36	3	4					0	18.09	3	5					0	7.18	2	3					0	12.23	3	3					0	13.56
P07492-3	Isoform 3 of Gastrin-releasing peptide OS=Homo sapiens GN=GRP - [GRP_HUMAN]	42.55	3	2	8	19	0	0	688555	3.76247e+07	1.90193e+07																					0	8.51	1	1					0	7.8	1	1					0	29.79
Q02818	Nucleobindin-1 OS=Homo sapiens GN=NUCB1 PE=1 SV=4 - [NUCB1_HUMAN]	42.52	2	7	21	41	748214	793003	483804	4.29206e+07	4.1729e+07					0	15.84	5	5	51.1	3.69	2	2	3.36444	11.5	6	6					3.86201	9.33	3	3	30.47	2.17	1	2	1.7616	24.51	9	11					1.84945	5.21
B4DTG2	Uncharacterized protein OS=Homo sapiens PE=2 SV=1 - [B4DTG2_HUMAN]	42.51	4	12	17	114	785920	183424	0	2.64621e+07	2.41199e+07	21.53	3.49	2	2	2.40179	8.21	3	4	35.73	3.49	2	3	7.36393	6.37	3	5	33.53	3.29	2	2	2.44714	4.72	3	3	235.593	14.78	7	13	29.6199	20.74	9	17	209.419	18.69	9	15	29.8637	17.25
Q99536	Synaptic vesicle membrane protein VAT-1 homolog OS=Homo sapiens GN=VAT1 PE=1 SV=2 - [VAT1_HUMAN]	42.49	6	9	14	156	4.91265e+07	4.8482e+07	3.84022e+07	3.16827e+07	2.28988e+07	139.54	18.58	4	9	22.0731	18.58	4	10	127.763	18.58	4	13	24.77	18.58	4	15	182.827	11.7	3	11	29.0107	18.58	4	14	100.657	13.74	5	10	19.2165	15.27	6	11	77.82	12.21	4	9	14.9226	15.78
F5H868	Uncharacterized protein OS=Homo sapiens GN=TTR PE=3 SV=1 - [F5H868_HUMAN]	42.45	3	1	4	19	2.75934e+06	448239	0	2.05618e+07	1.89358e+07					0	9.35	1	1					0	7.19	1	1									73.1267	15.83	1	3	10.0302	15.83	1	3	130.43	15.83	1	5	18.1958	15.83
Q8IWB7	WD repeat and FYVE domain-containing protein 1 OS=Homo sapiens GN=WDFY1 PE=1 SV=1 - [WDFY1_HUMAN]	42.44	1	1	12	19	726069	1.70282e+06	273475	0	1.69066e+07					0	17.32	3	3					0	17.8	4	5					0	8.05	2	2					4.39742	6.34	1	3					0	17.32
C9JIZ3	Uncharacterized protein OS=Homo sapiens GN=GCA PE=4 SV=1 - [C9JIZ3_HUMAN]	42.42	2	1	5	8	0	0	0	0	2.47099e+07																					0	27.27	1	1													0	32.58
Q9ULG6-2	Isoform 2 of Cell cycle progression protein 1 OS=Homo sapiens GN=CCPG1 - [CCPG1_HUMAN]	42.41	10	1	25	59	5.33798e+06	5.4864e+06	1.43936e+06	3.52905e+07	3.47797e+07					6.24353	14.03	5	9					7.79991	13.05	6	10					2.2941	7.83	4	4					1.8461	18.27	8	11	0	3.1	3	4	2.10624	8.16
Q9Y2Q5	Ragulator complex protein LAMTOR2 OS=Homo sapiens GN=LAMTOR2 PE=1 SV=1 - [LTOR2_HUMAN]	42.4	2	2	6	22	4.58722e+06	702648	8.94191e+06	6.85629e+07	4.42027e+07					1.68465	12	2	4					0	8	1	2					0	20.8	3	3					0	20.8	2	2					0	20.8
P02671	Fibrinogen alpha chain OS=Homo sapiens GN=FGA PE=1 SV=2 - [FIBA_HUMAN]	42.38	4	14	33	207	4.18328e+06	3.3164e+06	4.39792e+06	4.64818e+07	3.72212e+07	177.087	9.7	7	12	31.2643	17.09	16	22	143.738	11.78	9	15	27.8098	16.17	12	20	183.511	10.85	8	12	29.1366	21.13	15	23	223.176	12.36	10	20	30.6544	18.59	12	23	223.406	11.2	9	18	31.1746	18.13
Q12904	Aminoacyl tRNA synthase complex-interacting multifunctional protein 1 OS=Homo sapiens GN=AIMP1 PE=1 SV=2 - [AIMP1_HUMAN]	42.31	3	3	13	34	1.67079e+06	0	4.54314e+06	2.21994e+07	2.0264e+07					1.61457	6.41	2	3					0	4.49	1	1					0	5.13	1	1	32.57	3.85	1	1	0	10.26	3	3	0	2.24	2	2	1.8757	17.95
Q92520	Protein FAM3C OS=Homo sapiens GN=FAM3C PE=1 SV=1 - [FAM3C_HUMAN]	42.29	3	3	8	30	4.24573e+06	6.9585e+06	1.99896e+06	9892541	1.38322e+07	91.33	8.37	1	2	8.2078	16.3	3	4	199.25	7.05	1	2	8.98261	11.89	2	3	111.78	15.42	2	2	8.58052	20.26	3	4	48.76	8.81	2	2	4.23475	14.54	3	3					0	5.29
A8MZA4	Putative golgin subfamily A member 6-like protein 6 OS=Homo sapiens GN=GOLGA6L6 PE=5 SV=3 - [GG6L6_HUMAN]	42.27	1	1	32	118	9.06602e+06	1.31389e+07	1.08207e+07	1.62186e+08	1.91029e+08	0	2.13	2	3	1.65518	16.27	10	14	26.2007	4.13	2	4	7.0547	19.6	12	18					7.26727	17.33	10	16	21.16	2.93	1	3	9.15977	18.8	7	13	26.52	5.73	3	5	7.84633	7.6
B3KX72	Uncharacterized protein OS=Homo sapiens GN=HNRNPU PE=2 SV=1 - [B3KX72_HUMAN]	42.27	4	10	32	181	4.16554e+06	4.61882e+06	3.36153e+06	2.25407e+07	1.87147e+08	149.236	9.2	4	6	18.6422	16.13	8	15	167.28	6.53	3	5	23.3309	17.07	9	15	159.426	2	1	3	11.1489	19.33	9	19	135.293	7.47	6	10	21.9309	22.4	16	24	73.6333	8.27	7	9	15.1715	24.13
Q96LP2	Protein FAM81B OS=Homo sapiens GN=FAM81B PE=2 SV=3 - [FA81B_HUMAN]	42.26	1	1	15	32	345901	756583	651432	5.3928e+07	2.22765e+08					0	5.31	1	1					1.68436	15.71	5	7					0	15.27	5	5					6.13811	22.35	6	9					1.65084	19.69
P50395	Rab GDP dissociation inhibitor beta OS=Homo sapiens GN=GDI2 PE=1 SV=2 - [GDIB_HUMAN]	42.25	6	7	18	122	0	874428	487695	2.12383e+07	1.40676e+07	28.42	2.7	1	2	4.63123	2.7	1	2					4.64089	4.72	2	3	32.72	4.72	2	3	2.55877	13.03	5	8	112.12	11.46	5	8	15.3718	18.88	9	14	161.72	9.44	4	7	16.2228	11.46
O75083	WD repeat-containing protein 1 OS=Homo sapiens GN=WDR1 PE=1 SV=4 - [WDR1_HUMAN]	42.24	5	10	17	144	1.04052e+06	808234	741554	2.48163e+07	2.08543e+07	101.993	14.36	4	6	23.3933	17.66	7	13	59.43	13.04	5	8	15.4582	13.04	5	10	62.05	16.34	6	7	15.3769	24.26	10	14					3.4856	10.56	5	12					3.4907	8.91
Q9BZD4	Kinetochore protein Nuf2 OS=Homo sapiens GN=NUF2 PE=1 SV=2 - [NUF2_HUMAN]	42.24	5	1	20	34	0	0	8.88995e+06	7.48287e+07	3.07401e+07					0	2.8	1	1									0	1.51	1	2	0	6.9	3	3					2.14935	24.57	10	10					0	16.38
Q9NY84-8	Isoform 8 of Vascular non-inflammatory molecule 3 OS=Homo sapiens GN=VNN3 - [VNN3_HUMAN]	42.24	1	2	4	18	1.27459e+07	6.27642e+06	8.9809e+06	1.03299e+08	1.68285e+08					4.08917	17.39	1	3					2.7186	32.3	2	4					0	17.39	1	1					2.24593	31.68	3	5					2.43284	17.39
Q9BX66-5	Isoform 5 of Sorbin and SH3 domain-containing protein 1 OS=Homo sapiens GN=SORBS1 - [SRBS1_HUMAN]	42.23	13	24	37	281	1.5022e+07	1.39023e+06	5.80679e+06	4.19083e+07	3.22685e+07	178.55	12.85	10	15	39.1953	18.13	14	25	226.536	13.35	11	19	47.0089	18.82	15	28	176.846	18.53	14	20	43.653	21.61	18	28	404.531	16.73	14	24	53.459	19.42	17	30	480.276	14.04	11	23	56.9459	17.53
Q8N5K1	CDGSH iron-sulfur domain-containing protein 2 OS=Homo sapiens GN=CISD2 PE=1 SV=1 - [CISD2_HUMAN]	42.22	2	3	7	36	0	0	0	13512177	9.67054e+06	33.59	11.11	1	1	6.79825	11.11	1	2																	38.19	17.04	2	3	5.19434	25.19	3	4	80.21	17.04	2	4	13.5092	34.81
P55795	Heterogeneous nuclear ribonucleoprotein H2 OS=Homo sapiens GN=HNRNPH2 PE=1 SV=1 - [HNRH2_HUMAN]	42.09	2	1	13	72	1.10053e+06	956556	834267	3.69833e+08	2.40304e+06	152.79	8.69	3	5	13.8792	26.28	6	11	140.87	14.92	4	6	15.5856	14.92	4	7	157.02	12.03	3	5	15.8762	20.27	5	7					0	3.79	1	2					0	4.68
P17096	High mobility group protein HMG-I/HMG-Y OS=Homo sapiens GN=HMGA1 PE=1 SV=3 - [HMGA1_HUMAN]	42.06	2	2	6	17	2.8562e+06	0	0	6714553	2.23992e+07					0	14.02	1	1																					0	6.54	1	1	44.85	28.97	3	4	5.76086	28.97
P22087	rRNA 2'-O-methyltransferase fibrillarin OS=Homo sapiens GN=FBL PE=1 SV=2 - [FBRL_HUMAN]	42.06	2	3	11	35	837865	1.20453e+06	1.39099e+06	7.03916e+06	7.32692e+06					0	15.26	3	4	21.91	10.28	2	3	5.52422	16.51	4	5	29.55	4.36	1	2	3.14884	7.17	2	3	36.74	5.92	1	2	0	13.4	3	4					3.30651	12.15
Q96S19-3	Isoform 3 of UPF0585 protein C16orf13 OS=Homo sapiens GN=C16orf13 - [CP013_HUMAN]	42.06	3	1	3	8	0	0	0	18128893	1.84805e+07					1.75431	17.76	1	1					1.62129	17.76	1	1													2.16051	24.3	2	2					0	15.89
P11912	B-cell antigen receptor complex-associated protein alpha chain OS=Homo sapiens GN=CD79A PE=1 SV=2 - [CD79A_HUMAN]	42.04	2	1	4	7	1.51713e+06	0	0	3.30543e+06	0	32.88	9.73	1	1	3.95703	26.11	2	2																					0	23.89	2	2					1.73045	15.93
P16615	Sarcoplasmic/endoplasmic reticulum calcium ATPase 2 OS=Homo sapiens GN=ATP2A2 PE=1 SV=1 - [AT2A2_HUMAN]	42.03	7	16	35	247	8.01786e+06	8.38248e+06	8.41537e+06	2.61573e+07	1.91619e+08	257.426	13.53	10	17	43.5379	14.49	10	19	320.585	14.3	11	19	50.0554	15.74	12	21	321.025	12.57	9	15	39.8952	19.77	12	19	441.983	16.12	13	20	43.6659	19.29	16	25	447.42	18.33	15	28	50.071	25.72
E9PBV3	Uncharacterized protein OS=Homo sapiens GN=SBSN PE=4 SV=1 - [E9PBV3_HUMAN]	42.03	1	2	12	29	0	4.88486e+06	663883	1.13694e+08	2.27158e+07													0	9.66	4	5					0	5.59	2	2					0	9.15	3	4					0	9.15
F5H6Y9	Uncharacterized protein OS=Homo sapiens GN=ZBTB48 PE=4 SV=1 - [F5H6Y9_HUMAN]	41.98	1	1	4	17	1.81734e+06	2.16776e+06	1.11808e+06	3.64945e+07	4.95073e+07					0	12.98	2	2					0	12.98	1	2					0	12.98	1	1					0	22.9	2	2					5.53093	32.06
Q6NVY1	3-hydroxyisobutyryl-CoA hydrolase, mitochondrial OS=Homo sapiens GN=HIBCH PE=1 SV=2 - [HIBCH_HUMAN]	41.97	4	2	17	34	669788	2.00501e+06	593239	2.19615e+06	3.30041e+06					0	10.36	3	3					0	6.99	1	1					0	6.22	2	2					0	7.51	2	2					0	3.11
P11047	Laminin subunit gamma-1 OS=Homo sapiens GN=LAMC1 PE=1 SV=3 - [LAMC1_HUMAN]	41.95	1	33	63	486	1.00819e+07	4.35395e+06	3.09901e+06	1.74426e+08	7.05317e+07	733.575	10.88	14	29	79.0544	16.84	20	39	1012.6	14.85	20	33	99.3688	19.7	25	42	1011.08	14.36	19	32	96.9642	19.08	24	39	1137.76	20.57	30	59	125.562	27.72	38	66	1004.08	18.96	28	56	125.903	21.88
P62906	60S ribosomal protein L10a OS=Homo sapiens GN=RPL10A PE=1 SV=2 - [RL10A_HUMAN]	41.94	1	5	10	58	407908	0	689246	2.91565e+07	2.94425e+07					3.58956	21.66	3	3					0	10.14	2	2					0	9.22	2	2	36.82	17.97	3	6	10.8677	21.66	4	10	57.4983	25.81	5	10	19.4026	25.81
Q15019-2	Isoform 2 of Septin-2 OS=Homo sapiens GN=SEPT2 - [SEPT2_HUMAN]	41.92	14	8	15	48	470757	1.45835e+06	1.47225e+06	1.66473e+07	6.54483e+06					1.83587	2.27	1	2	132.74	11.36	4	6	10.6155	21.97	6	8	82.6133	7.58	3	4	10.0411	9.85	3	4	20.4	9.09	3	4	4.67676	6.82	2	4					2.67644	14.65
P28062-2	Isoform 2 of Proteasome subunit beta type-8 OS=Homo sapiens GN=PSMB8 - [PSB8_HUMAN]	41.91	4	2	13	24	1.90397e+06	2.97119e+06	3.04599e+06	1.23773e+06	31288348					0	26.84	7	8					0	14.34	3	3					0	8.82	2	3					0	3.31	1	1					0	3.31
Q15582	Transforming growth factor-beta-induced protein ig-h3 OS=Homo sapiens GN=TGFBI PE=1 SV=1 - [BGH3_HUMAN]	41.87	3	16	28	210	3.26446e+06	3.31497e+06	2.23206e+06	8.08923e+07	5.01533e+07	356.643	15.81	9	18	50.1934	24.3	13	23	314.965	18.59	10	16	49.608	23.57	15	25	271.592	15.23	8	14	46.9615	19.03	10	19	252.88	14.06	9	17	28.5074	16.11	9	21	226.697	15.08	9	18	39.5933	19.47
P00505	Aspartate aminotransferase, mitochondrial OS=Homo sapiens GN=GOT2 PE=1 SV=3 - [AATM_HUMAN]	41.86	3	11	19	135	2.02696e+06	1.52279e+06	1.81945e+06	2.47967e+07	2.55867e+07	123.34	13.49	5	10	24.5985	14.65	6	12	206.443	13.49	5	10	23.9502	20.93	7	12	206.965	13.72	5	9	24.8397	16.98	7	13	113.231	8.84	5	10	14.1075	10.7	5	9	53.2523	8.84	4	7	8.53858	8.84
P06396	Gelsolin OS=Homo sapiens GN=GSN PE=1 SV=1 - [GELS_HUMAN]	41.82	7	1	32	561	1.4564e+07	1.4159e+07	7.3108e+06	1.36432e+08	1.11776e+08	954.951	31.71	18	46	141.201	35.68	23	55	1099.61	28.13	17	49	154.848	32.1	21	56	879.172	26.6	15	43	116.522	27.75	17	47	748.714	28.9	18	39	107.693	29.92	19	42	708.484	28.52	18	38	106.752	28.64
P55268	Laminin subunit beta-2 OS=Homo sapiens GN=LAMB2 PE=1 SV=2 - [LAMB2_HUMAN]	41.82	5	32	68	436	4.43828e+06	2.64419e+06	3.57818e+06	5.99705e+07	6.86049e+07	739.537	17.41	23	36	84.5996	20.24	26	41	866.987	18.3	25	42	106.597	21.19	31	50	805.361	13.63	19	32	89.8227	21.91	26	42	727.715	12.57	19	33	84.5762	18.3	26	43	910.326	17.02	23	42	105.728	21.25
Q9NR45	Sialic acid synthase OS=Homo sapiens GN=NANS PE=1 SV=2 - [SIAS_HUMAN]	41.78	3	3	16	48	1.93166e+06	1.32999e+06	1.73488e+06	1.04541e+07	1.44392e+07					0	16.16	4	5					0	8.08	3	3					0	1.95	2	2					0	13.09	3	3					2.62012	13.93
P02774	Vitamin D-binding protein OS=Homo sapiens GN=GC PE=1 SV=1 - [VTDB_HUMAN]	41.77	5	4	15	39	0	1.34887e+06	863627	2.86572e+07	1.90497e+07													0	3.59	1	1					0	6.54	1	1					5.48412	10.13	5	7	28.4	7.81	3	4	5.0396	14.77
P62280	40S ribosomal protein S11 OS=Homo sapiens GN=RPS11 PE=1 SV=3 - [RS11_HUMAN]	41.77	1	1	7	14	0	1.72007e+06	837754	6.01799e+06	3.34304e+07													0	7.59	1	1					0	25.32	3	3					2.6014	6.96	2	3					0	9.49
P46777	60S ribosomal protein L5 OS=Homo sapiens GN=RPL5 PE=1 SV=3 - [RL5_HUMAN]	41.75	2	6	15	84	1.2695e+07	9.76848e+06	7.5497e+06	2.28428e+08	2.11377e+08					3.34478	6.4	2	4					1.65397	22.56	6	8					6.94147	19.87	5	9	82.14	12.79	4	7	12.3946	14.81	4	12	54.74	12.79	4	5	7.9109	14.81
P31944	Caspase-14 OS=Homo sapiens GN=CASP14 PE=1 SV=2 - [CASPE_HUMAN]	41.74	1	1	9	21	3.21772e+06	919531	2.33102e+06	0	1.082e+07					0	19.01	4	6					0	21.9	3	3					0	7.02	2	2													0	4.55
Q04826	HLA class I histocompatibility antigen, B-40 alpha chain OS=Homo sapiens GN=HLA-B PE=1 SV=1 - [1B40_HUMAN]	41.71	14	1	14	161	6.19594e+06	5.92162e+06	4.38351e+06	7.75645e+07	6.70367e+07	175.062	30.66	10	18	29.8051	29.01	9	16	234.273	32.87	10	16	38.7158	33.98	10	16	131.15	24.31	8	15	24.8275	25.14	8	15	310.763	25.69	7	14	37.4494	24.03	6	12	270.349	21.82	6	13	36.8935	20.17
E9PGT1	Uncharacterized protein OS=Homo sapiens GN=TSN PE=4 SV=1 - [E9PGT1_HUMAN]	41.7	4	2	8	26	0	0	0	3.49748e+06	1.09714e+07																									25.52	8.97	1	1	2.7492	15.25	2	3					2.1209	22.87
Q0ZGT2-2	Isoform 2 of Nexilin OS=Homo sapiens GN=NEXN - [NEXN_HUMAN]	41.69	7	4	33	81	1.4777e+07	662830	1.20649e+06	7.51028e+07	2.9593e+07	22.06	3.63	3	3	3.5469	14.35	7	14	46.28	7.85	5	8	6.69675	8.61	5	7	29.57	4.53	3	3	2.6419	9.37	5	5	29.94	2.11	2	3	0	14.65	8	11	30.24	3.63	3	3	0	7.1
P61313	60S ribosomal protein L15 OS=Homo sapiens GN=RPL15 PE=1 SV=2 - [RL15_HUMAN]	41.67	6	6	9	50	0	0	0	2.25676e+07	3.04353e+07					0	4.41	1	1					1.6683	4.41	1	2									55.73	29.41	6	10	8.87024	32.84	7	10	60.9833	29.41	6	11	11.4952	29.41
P00738	Haptoglobin OS=Homo sapiens GN=HP PE=1 SV=1 - [HPT_HUMAN]	41.63	3	10	20	107	0	0	0	7.98919e+07	7.79061e+07					1.82449	6.9	2	2					1.62383	3.69	1	1					0	3.69	1	1	155.586	21.67	10	18	27.1076	29.06	12	20	155.598	18.72	9	17	24.2926	22.41
P62851	40S ribosomal protein S25 OS=Homo sapiens GN=RPS25 PE=1 SV=1 - [RS25_HUMAN]	41.6	1	2	8	26	0	338373	0	4.23129e+07	3.29171e+07													0	6.4	1	1									68.9279	15.2	2	5	11.7584	32	4	6	66.21	15.2	2	4	9.91468	21.6
Q96CW1-2	Isoform 2 of AP-2 complex subunit mu OS=Homo sapiens GN=AP2M1 - [AP2M1_HUMAN]	41.57	10	3	19	34	595427	345117	1.34956e+06	7.23323e+06	4.99241e+06	49.1	3.93	1	1	8.17421	18.24	5	8	44.77	3.93	1	1	3.78644	5.77	2	2					0	12.24	3	3	22.46	2.31	1	2	3.37057	11.78	4	4					0	3.7
P07954-2	Isoform Cytoplasmic of Fumarate hydratase, mitochondrial OS=Homo sapiens GN=FH - [FUMH_HUMAN]	41.54	4	11	16	170	1.61868e+06	2.31216e+06	1.47173e+06	2.10833e+07	2.10919e+07	237.667	26.98	8	13	25.744	20.99	6	10	170.363	28.05	8	10	28.5954	29.55	9	11	255.184	31.48	9	15	41.7814	32.76	11	17	109.213	15.2	4	8	28.7602	23.77	8	13	72.72	17.99	6	10	22.4515	22.48
O75348	V-type proton ATPase subunit G 1 OS=Homo sapiens GN=ATP6V1G1 PE=1 SV=3 - [VATG1_HUMAN]	41.53	1	1	5	13	6.96107e+06	0	0	0	9.7092e+06					0	8.47	1	1													0	11.86	1	1					3.37421	13.56	2	3					1.66494	23.73
P50213	Isocitrate dehydrogenase [NAD] subunit alpha, mitochondrial OS=Homo sapiens GN=IDH3A PE=1 SV=1 - [IDH3A_HUMAN]	41.53	3	4	13	34	3.80274e+06	2.93212e+06	969860	6.34997e+06	6.09059e+06					1.84133	12.84	3	3					8.29021	19.4	5	6					1.68112	13.11	3	4	48.13	2.73	1	2	2.27561	2.73	1	2	28.63	6.56	2	2	4.09845	8.47
O14818	Proteasome subunit alpha type-7 OS=Homo sapiens GN=PSMA7 PE=1 SV=1 - [PSA7_HUMAN]	41.53	9	6	11	48	0	631392	0	8.75405e+06	6.06199e+06									106.78	6.05	1	2	6.39596	6.05	1	2									49.25	4.44	1	2	6.08815	10.08	2	3	105.74	10.08	2	4	10.5925	21.77
B4DZ87	Uncharacterized protein OS=Homo sapiens GN=TOMM70A PE=2 SV=1 - [B4DZ87_HUMAN]	41.52	2	4	22	61	661460	401777	1.16732e+06	2.49205e+07	2.51479e+07					2.1717	5.39	2	2					0	14.97	4	6					0	11.38	5	6	54.5888	8.58	4	7	12.1536	12.57	6	9	24.78	7.39	4	5	6.75883	12.77
P11940	Polyadenylate-binding protein 1 OS=Homo sapiens GN=PABPC1 PE=1 SV=2 - [PABP1_HUMAN]	41.51	10	2	20	45	2.07532e+06	747524	498266	2.08349e+08	4.4155e+07					2.16436	13.21	4	5	20.8	2.36	1	1	2.49162	12.26	5	6					2.45044	4.09	2	2					0	7.39	3	4					1.7472	9.59
O75937	DnaJ homolog subfamily C member 8 OS=Homo sapiens GN=DNAJC8 PE=1 SV=2 - [DNJC8_HUMAN]	41.5	1	1	11	27	2.10337e+06	2.52834e+06	1.87565e+06	4.64634e+06	6.46283e+06					0	13.44	4	7					0	3.56	1	2					0	7.11	2	6					0	7.91	2	3					0	15.02
Q9BQ24	Zinc finger FYVE domain-containing protein 21 OS=Homo sapiens GN=ZFYVE21 PE=1 SV=1 - [ZFY21_HUMAN]	41.45	2	1	8	10	0	0	3.59126e+06	18110843	0					0	5.56	1	1													0	16.67	4	4					0	10.26	1	1					0	7.26
Q14683	Structural maintenance of chromosomes protein 1A OS=Homo sapiens GN=SMC1A PE=1 SV=2 - [SMC1A_HUMAN]	41.44	2	4	52	104	2.91482e+06	1.98089e+06	2.13239e+06	4.561e+07	3.70907e+07	0	0.49	1	1	5.35546	7.95	7	8					4.97401	9.16	9	11					3.61338	7.22	7	8	0	3.33	5	8	5.9392	8.19	11	14	0	2.51	4	6	5.33052	9.57
C9K004	Uncharacterized protein OS=Homo sapiens GN=PSTPIP1 PE=4 SV=1 - [C9K004_HUMAN]	41.41	3	1	14	25	1.13606e+06	3.62927e+06	1.54206e+06	2.74017e+07	4.39558e+07					0	2.78	1	1					0	12.37	3	3					1.73281	9.09	3	3					0	8.84	4	4					1.64033	12.37
C9J3R0	Uncharacterized protein OS=Homo sapiens GN=RCC1 PE=4 SV=1 - [C9J3R0_HUMAN]	41.39	8	2	10	25	2.06635e+06	0	464721	3.39738e+07	2.55825e+07	20.11	10.62	1	1	2.65013	18.32	3	3									50.99	17.58	2	2	4.0922	26.74	4	4					1.72393	8.06	2	4					0	4.4
P30084	Enoyl-CoA hydratase, mitochondrial OS=Homo sapiens GN=ECHS1 PE=1 SV=4 - [ECHM_HUMAN]	41.38	1	6	11	78	1.408e+06	1.63896e+06	1.1675e+06	0	0	116.418	11.03	3	6	10.8959	16.55	4	10	116.657	16.55	5	7	13.6743	14.14	4	9	97.96	16.55	5	6	10.3602	18.97	5	11					0	3.1	1	1
P13647	Keratin, type II cytoskeletal 5 OS=Homo sapiens GN=KRT5 PE=1 SV=3 - [K2C5_HUMAN]	41.36	15	3	27	202	3.30506e+07	3.06611e+07	2.79402e+07	1.68428e+08	1.37205e+08	80.1966	7.12	6	12	22.074	18.64	9	16	100.879	7.8	6	13	19.3661	7.8	6	12	112.604	8.64	7	16	19.7972	6.1	5	13	62.8195	6.61	6	14	11.2884	8.64	5	13	70.2945	5.08	5	13	14.4441	11.02
C9JK10	Uncharacterized protein OS=Homo sapiens GN=ITGA6 PE=3 SV=1 - [C9JK10_HUMAN]	41.34	10	17	39	135	1.64587e+07	841222	2.4419e+06	5.6147e+07	1.57728e+07	35.95	1.75	1	1	5.80624	7.27	5	7	43.16	1.75	1	1	4.06476	10.04	7	7	42.6	1.75	1	1	3.34588	12.34	7	7	261.472	12.06	11	16	31.5641	17.22	17	26	282.301	12.06	12	20	42.9705	18.05
P08107	Heat shock 70 kDa protein 1A/1B OS=Homo sapiens GN=HSPA1A PE=1 SV=5 - [HSP71_HUMAN]	41.34	11	19	28	435	9.18913e+06	9.38807e+06	7.92299e+06	6.33533e+07	5.13085e+07	604.788	26.05	14	30	73.7997	27.15	14	32	564.685	27.46	16	34	79.1277	28.24	16	33	605.135	33.23	18	33	84.6392	34.48	19	38	405.139	19.66	11	21	43.4769	22.15	13	25	479.226	22.78	12	25	56.3741	25.9
P00813	Adenosine deaminase OS=Homo sapiens GN=ADA PE=1 SV=3 - [ADA_HUMAN]	41.32	3	5	14	39	753740	0	473453	1.27677e+07	1.02376e+07					0	2.75	1	1													0	12.4	4	5					1.6854	16.53	4	5					2.39928	14.6
Q02252	Methylmalonate-semialdehyde dehydrogenase [acylating], mitochondrial OS=Homo sapiens GN=ALDH6A1 PE=1 SV=2 - [MMSA_HUMAN]	41.31	1	10	18	99	0	0	5.10469e+06	2.09677e+07	1.15866e+07					0	7.1	3	5													2.02617	5.42	2	2	65.95	7.48	4	8	6.73421	11.4	5	9	0	1.12	1	2	0	5.42
A6NE78	Uncharacterized protein OS=Homo sapiens GN=TNNT3 PE=4 SV=1 - [A6NE78_HUMAN]	41.27	14	1	11	22	1.22565e+08	1.65813e+08	1.05039e+08	0	8.32174e+06					3.74766	11.9	4	6					3.6581	27.38	4	5					0	24.21	4	4													0	3.57
Q14061	Cytochrome c oxidase copper chaperone OS=Homo sapiens GN=COX17 PE=1 SV=2 - [COX17_HUMAN]	41.27	2	1	3	4	0	0	477727	39605	0					0	14.29	1	1													0	26.98	1	1					0	14.29	1	1
Q9NSY2-3	Isoform 2 of StAR-related lipid transfer protein 5 OS=Homo sapiens GN=STARD5 - [STAR5_HUMAN]	41.27	1	1	3	4	0	0	2.87157e+06	1.81639e+07	0																					0	39.68	1	1					0	41.27	3	3
P30050	60S ribosomal protein L12 OS=Homo sapiens GN=RPL12 PE=1 SV=1 - [RL12_HUMAN]	41.21	2	5	7	71	1.43435e+06	1.94135e+06	1.93092e+06	8.28913e+07	5.81654e+07	138.88	18.79	2	5	16.7498	18.79	2	5	81.53	18.79	2	4	14.1997	18.79	2	4	60.03	9.7	1	2	6.19505	9.7	1	2	142.317	15.15	2	4	11.9683	15.15	2	6	131.537	15.15	2	4	11.6523	20
P24522	Growth arrest and DNA damage-inducible protein GADD45 alpha OS=Homo sapiens GN=GADD45A PE=1 SV=1 - [GA45A_HUMAN]	41.21	2	1	4	10	0	3.04809e+06	1.84793e+06	7.48945e+07	30755681													0	10.91	1	3					0	21.21	2	2					0	10.91	1	1					1.64634	8.48
P61769	Beta-2-microglobulin OS=Homo sapiens GN=B2M PE=1 SV=1 - [B2MG_HUMAN]	41.18	2	2	3	83	3.05581e+06	5.16666e+06	4.00506e+06	3.04655e+07	3.54227e+07	52.99	16.81	2	4	9.31208	16.81	2	4	92.0567	16.81	2	8	20.5672	16.81	2	8	51.14	16.81	2	6	13.913	41.18	3	7	90.31	16.81	2	7	16.4494	16.81	2	7	77.91	16.81	2	7	15.2838	16.81
P61353	60S ribosomal protein L27 OS=Homo sapiens GN=RPL27 PE=1 SV=2 - [RL27_HUMAN]	41.18	1	1	5	12	0	1.52719e+06	0	6.39593e+06	4.72368e+06													0	14.71	2	2													2.34021	23.53	2	3					5.71199	15.44
Q9NQG1	Protein MANBAL OS=Homo sapiens GN=MANBAL PE=1 SV=1 - [MANBL_HUMAN]	41.18	1	1	2	5	0	0	992168	0	0																					0	27.06	1	1
P10909-2	Isoform 2 of Clusterin OS=Homo sapiens GN=CLU - [CLUS_HUMAN]	41.12	12	12	20	192	7.94109e+06	7.49825e+06	6.02321e+06	8.56543e+07	9.2993e+07	312.679	15.77	6	17	51.478	19.96	7	20	267.488	15.77	6	13	37.3242	17.17	7	16	287.212	15.77	6	16	47.435	21.56	8	20	237.458	17.56	9	16	32.7734	25.75	13	23	277.735	16.17	7	15	38.9172	26.75
Q8IVM0-2	Isoform 2 of Coiled-coil domain-containing protein 50 OS=Homo sapiens GN=CCDC50 - [CCD50_HUMAN]	41.08	2	2	21	45	2.23339e+06	4.32973e+06	4.29858e+06	2.23989e+07	1.42972e+08					0	10.37	4	4					3.51129	6.64	4	7					0	6.43	4	5	0	1.66	1	1	1.78141	14.32	5	6					0	6.85
F8W031	Uncharacterized protein OS=Homo sapiens PE=4 SV=1 - [F8W031_HUMAN]	41.06	10	3	14	83	1.68601e+07	0	334477	2.26826e+07	2.06286e+07					1.8755	12.55	3	7					1.71424	20.53	3	4					3.31978	11.03	3	4	100.175	13.31	3	4	11.9596	22.81	6	14	99.6228	14.07	3	5	12.3112	19.01
Q9UBS4	DnaJ homolog subfamily B member 11 OS=Homo sapiens GN=DNAJB11 PE=1 SV=1 - [DJB11_HUMAN]	41.06	1	6	12	50	470360	819547	809660	4.74674e+06	6.33357e+06					0	9.22	2	2					0	18.44	4	4	25.02	1.68	1	2	2.53154	6.98	2	3	106.743	4.47	1	2	8.33453	24.02	4	6	160.626	9.78	3	4	11.9384	9.78
A6NGP5	Uncharacterized protein OS=Homo sapiens GN=HN1L PE=2 SV=2 - [A6NGP5_HUMAN]	41.01	1	1	5	8	0	991588	1.37906e+06	0	1.77045e+07													0	14.61	2	2					0	34.27	3	3													0	12.92
Q9BV40	Vesicle-associated membrane protein 8 OS=Homo sapiens GN=VAMP8 PE=1 SV=1 - [VAMP8_HUMAN]	41	3	2	4	13	0	0	0	0	0																																					0	8
P16284-6	Isoform Delta15 of Platelet endothelial cell adhesion molecule OS=Homo sapiens GN=PECAM1 - [PECA1_HUMAN]	40.99	9	11	26	99	727444	928873	1.0082e+06	2.27767e+07	1.57016e+07	23.2667	6.6	4	5	9.46955	11.42	6	7	51.63	3.44	2	3	10.287	11.83	6	9	29.67	3.85	2	2	6.9319	12.24	6	7	207.095	9.77	7	12	21.4846	19.67	12	19	222.31	12.52	8	13	21.7114	22.83
P02794	Ferritin heavy chain OS=Homo sapiens GN=FTH1 PE=1 SV=2 - [FRIH_HUMAN]	40.98	7	2	5	19	0	0	0	7.40287e+06	6.279e+06																									35.06	16.39	3	5	7.75192	29.51	4	5	31.99	10.93	2	4	6.2426	10.93
P20774	Mimecan OS=Homo sapiens GN=OGN PE=1 SV=1 - [MIME_HUMAN]	40.94	2	10	13	248	4829082	6.42625e+06	4.94329e+06	1.42695e+08	1.61323e+08	360.413	33.89	9	20	48.6575	31.88	9	22	453.219	30.87	8	20	55.0853	32.21	10	24	332.515	33.22	9	20	42.8117	31.88	9	21	475.551	25.5	8	24	55.2534	26.51	9	27	305.369	20.13	7	21	50.9786	29.87
Q15181	Inorganic pyrophosphatase OS=Homo sapiens GN=PPA1 PE=1 SV=2 - [IPYR_HUMAN]	40.83	2	5	8	28	0	0	0	1.26845e+07	0					0	11.07	2	2																	22.42	5.54	1	1	2.19186	5.54	1	1
P50991	T-complex protein 1 subunit delta OS=Homo sapiens GN=CCT4 PE=1 SV=4 - [TCPD_HUMAN]	40.82	4	14	21	195	1.41622e+06	1.193e+06	1.07356e+06	2.65175e+07	2.05563e+07	305.7	14.84	6	12	36.9313	18.74	8	15	264.621	15.03	7	11	36.3371	20.96	9	15	297.637	18.74	8	17	41.3937	18.92	8	15	302.234	15.21	7	16	31.3096	19.67	10	22	266.953	18.55	9	20	41.0417	24.3
Q9HBL7	Transmembrane protein C9orf46 OS=Homo sapiens GN=C9orf46 PE=2 SV=1 - [CI046_HUMAN]	40.82	1	2	7	27	3.74769e+06	0	0	1.85542e+06	1.50059e+06					0	9.52	1	1													3.91412	18.37	2	3	41.22	13.61	2	3	5.11477	13.61	2	3	28.34	8.84	1	1	2.13689	13.61
Q99807-2	Isoform 2 of Ubiquinone biosynthesis protein COQ7 homolog OS=Homo sapiens GN=COQ7 - [COQ7_HUMAN]	40.78	2	2	8	17	0	0	0	4.94616e+06	0													0	4.47	1	1									36.64	19.55	2	2	3.88199	24.58	3	3
P55809	Succinyl-CoA:3-ketoacid-coenzyme A transferase 1, mitochondrial OS=Homo sapiens GN=OXCT1 PE=1 SV=1 - [SCOT1_HUMAN]	40.77	3	9	15	57	1.30292e+06	492727	636002	9.01139e+06	7.69499e+06	90.21	2.69	1	2	5.90123	2.69	1	2	110.667	5.77	2	3	12.2255	14.04	5	7	138.03	5.77	2	3	11.9085	14.62	5	8	20.73	2.5	1	2	1.73219	8.08	3	5					3.26088	10.58
Q9Y250	Leucine zipper putative tumor suppressor 1 OS=Homo sapiens GN=LZTS1 PE=1 SV=3 - [LZTS1_HUMAN]	40.77	5	1	23	43	1.06878e+07	6.55824e+06	5.25622e+06	4.36511e+07	1.05843e+08					3.79656	6.54	4	4					3.92305	7.89	3	4					1.8703	11.07	5	6					5.63427	14.6	7	9					2.23971	13.09
O00483	NADH dehydrogenase [ubiquinone] 1 alpha subcomplex subunit 4 OS=Homo sapiens GN=NDUFA4 PE=1 SV=1 - [NDUA4_HUMAN]	40.74	1	3	4	21	0	0	0	2.75109e+07	17218300													1.62004	9.88	1	1					0	9.88	1	1	0	18.52	2	3	3.3975	18.52	2	2					3.48621	22.22
B4DDM6	Uncharacterized protein OS=Homo sapiens GN=BUB3 PE=2 SV=1 - [B4DDM6_HUMAN]	40.73	3	2	7	16	0	0	486208	4.37083e+07	5.35904e+07					0	5.65	1	1													0	7.66	1	1					0	16.94	3	4					0	8.47
B7Z1M1	Uncharacterized protein OS=Homo sapiens GN=RCN1 PE=2 SV=1 - [B7Z1M1_HUMAN]	40.71	3	3	12	27	823126	616541	0	1.18379e+07	6.49053e+06	60.14	4.64	1	2	7.81674	11.79	3	4	41.2	4.64	1	1	2.57542	10.71	3	3									60.32	4.64	1	1	5.72029	18.57	5	5	43.05	13.21	3	3	8.05497	17.5
Q9NR12	PDZ and LIM domain protein 7 OS=Homo sapiens GN=PDLIM7 PE=1 SV=1 - [PDLI7_HUMAN]	40.7	9	6	15	72	1.70386e+06	706502	1.5809e+06	2.81e+07	3.80058e+07	68.39	9.63	2	3	9.18998	16.41	4	6	107.813	12.25	3	6	15.0871	19.04	5	7					4.34861	12.69	3	4	74.9	14.44	4	8	16.7105	25.38	7	11	40.9933	7.66	3	5	9.09713	12.04
O14645	Axonemal dynein light intermediate polypeptide 1 OS=Homo sapiens GN=DNALI1 PE=2 SV=2 - [IDLC_HUMAN]	40.7	2	2	9	40	8.09161e+06	6.96013e+06	1.68914e+06	2.01041e+08	1.52179e+08					2.40585	15.89	3	6					2.29936	18.22	4	7					2.13948	12.79	2	5					0	7.75	1	3					0	12.4
F8VU90	Uncharacterized protein OS=Homo sapiens GN=FKBP11 PE=4 SV=1 - [F8VU90_HUMAN]	40.66	4	2	6	39	1.43271e+06	1.53826e+06	1.12118e+06	2.12757e+07	2.29524e+07	34.9823	5.49	1	2	5.05698	5.49	1	2	58.7643	5.49	1	2	5.51856	13.19	2	3	51.8711	5.49	1	2	5.19527	5.49	1	2	28.84	5.49	1	1	6.04544	26.37	4	6	48.4611	5.49	1	2	7.65816	22.53
P18465	HLA class I histocompatibility antigen, B-57 alpha chain OS=Homo sapiens GN=HLA-B PE=1 SV=1 - [1B57_HUMAN]	40.61	9	1	11	171	4.97014e+06	5.59139e+06	4.48789e+06	1.04665e+08	7.0034e+07	196.218	32.87	9	18	33.5444	34.25	9	19	317.875	23.2	7	16	45.2191	29.56	7	18	285.359	24.86	8	16	34.2695	31.22	8	18	338.018	30.39	7	13	34.3102	28.73	6	15	322.597	22.38	6	13	37.6931	28.73
Q86UY5-3	Isoform 3 of Protein FAM83A OS=Homo sapiens GN=FAM83A - [FA83A_HUMAN]	40.6	3	1	10	24	0	3.85897e+06	969721	4.1565e+07	4.10977e+07					0	17.17	4	6					0	19.35	4	4					0	15.53	4	4					1.85314	4.63	1	2					0	4.63
P56385	ATP synthase subunit e, mitochondrial OS=Homo sapiens GN=ATP5I PE=1 SV=2 - [ATP5I_HUMAN]	40.58	1	3	3	11	0	1.12594e+06	1.09532e+06	0	0													2.07184	10.14	1	2					1.75575	10.14	1	2
Q04837	Single-stranded DNA-binding protein, mitochondrial OS=Homo sapiens GN=SSBP1 PE=1 SV=1 - [SSBP_HUMAN]	40.54	4	3	6	27	818563	586799	315174	0	0	55.2933	22.3	2	3	10.0988	28.38	3	4	87.36	22.3	2	2	9.29361	22.3	2	3	65.33	22.3	2	2	7.77325	22.3	2	2					0	4.05	1	1
O60884	DnaJ homolog subfamily A member 2 OS=Homo sapiens GN=DNAJA2 PE=1 SV=1 - [DNJA2_HUMAN]	40.53	1	3	14	31	0	0	0	6.28324e+06	0					0	6.07	2	3					0	2.43	1	2					0	2.43	1	1					0	19.9	5	5					0	7.28
Q8N5G2	Macoilin OS=Homo sapiens GN=TMEM57 PE=1 SV=1 - [MACOI_HUMAN]	40.51	1	1	23	40	159736	2.82131e+06	2.85983e+06	3.34735e+07	7.52965e+08					0	2.26	1	1	0	1.51	1	1	1.75268	13.1	6	6					5.4853	9.34	4	5					0	5.42	3	4	0	3.16	3	4	3.25991	5.87
Q14980-2	Isoform 2 of Nuclear mitotic apparatus protein 1 OS=Homo sapiens GN=NUMA1 - [NUMA1_HUMAN]	40.5	22	10	79	171	3.0042e+07	1.74943e+07	2.62618e+07	6.81147e+07	6.73674e+07	30.01	0.62	1	2	5.23748	8.71	15	17	91.16	3.9	7	10	16.9609	11.04	17	19	83.08	2.48	5	9	10.5952	8.23	13	16	42.1	2.86	6	6	11.913	9.71	16	18	72.55	6.09	10	11	21.1464	11.99
B4DQX9	Uncharacterized protein OS=Homo sapiens GN=MACF1 PE=2 SV=1 - [B4DQX9_HUMAN]	40.5	1	1	5	15	0	0	274824	0	0					0	9.92	1	1					0	9.92	1	3					0	17.36	2	4					0	12.4	1	1
P21810	Biglycan OS=Homo sapiens GN=BGN PE=1 SV=2 - [PGS1_HUMAN]	40.49	2	4	14	220	1.22078e+07	1.22358e+07	1.08336e+07	1.21299e+08	1.30983e+08	412.936	22.01	7	17	51.1162	36.14	11	23	508.129	27.99	9	24	64.189	35.05	10	25	409.765	23.91	8	20	51.4105	27.99	9	22	254.731	14.95	4	14	35.8481	23.91	6	16	186.7	14.95	4	12	32.8942	28.8
Q9ULU4	Protein kinase C-binding protein 1 OS=Homo sapiens GN=ZMYND8 PE=1 SV=2 - [PKCB1_HUMAN]	40.47	23	1	38	64	81419.2	1.385e+07	0	3.56796e+07	1.82446e+07					1.83537	4.47	3	4	24.27	2.28	2	2	4.50475	13.74	10	10					0	1.26	1	3					7.24336	10.37	8	11					1.60338	16.78
E7ES43	Uncharacterized protein OS=Homo sapiens GN=HSPA4L PE=3 SV=2 - [E7ES43_HUMAN]	40.46	4	1	26	52	0	2.69578e+06	405534	1.54616e+08	1.8385e+08													1.71558	2.99	2	2					1.68341	6.21	3	3	50.1987	3.79	3	5	8.0692	16.9	12	16	49.7317	0.69	1	2	7.79746	12.87
Q9BVK6	Transmembrane emp24 domain-containing protein 9 OS=Homo sapiens GN=TMED9 PE=1 SV=2 - [TMED9_HUMAN]	40.43	1	7	9	95	3.83679e+06	3.14581e+06	2.12287e+06	3.52134e+07	3.31081e+07	39.5627	11.91	4	6	4.64854	28.51	6	8	39.1916	8.09	3	4	2.3914	13.62	3	4	63.5433	20	5	9	9.60632	28.51	6	10	22.81	9.36	3	5	4.22428	13.62	4	7	38.1084	9.36	3	5	5.6311	13.62
Q99436	Proteasome subunit beta type-7 OS=Homo sapiens GN=PSMB7 PE=1 SV=1 - [PSB7_HUMAN]	40.43	1	1	8	22	821049	1.66905e+06	1.0428e+06	48459932	0					0	18.41	4	7					0	2.89	1	2					0	10.47	2	3					0	15.52	3	3
P17931	Galectin-3 OS=Homo sapiens GN=LGALS3 PE=1 SV=5 - [LEG3_HUMAN]	40.4	1	10	12	199	6.62479e+06	4.0981e+06	3.13895e+06	46600545	3.85996e+07	266.745	33.6	8	21	45.0294	37.6	10	23	258.42	34	9	23	46.6846	35.2	9	24	129.393	29.6	7	18	41.5955	36	10	22	164.11	20	5	16	33.8375	32.4	7	18	84.08	21.6	5	11	22.6679	28
P32119	Peroxiredoxin-2 OS=Homo sapiens GN=PRDX2 PE=1 SV=5 - [PRDX2_HUMAN]	40.4	3	8	9	193	2.50148e+06	3.08881e+06	2.5466e+06	1.37967e+08	1.32102e+08	82.35	19.7	4	6	16.2813	19.7	4	7	58.1633	14.65	2	3	12.0509	19.7	3	5	127.519	19.7	4	7	20.2815	19.7	4	7	380.784	40.4	9	20	45.9036	36.87	8	23	292.509	40.4	9	22	48.8124	36.87
O60888-3	Isoform C of Protein CutA OS=Homo sapiens GN=CUTA - [CUTA_HUMAN]	40.38	4	2	4	17	0	0	0	47676865	2.56554e+07					0	7.69	1	1																					3.73773	8.97	1	2	27.69	8.97	1	1	0	15.38
P84090	Enhancer of rudimentary homolog OS=Homo sapiens GN=ERH PE=1 SV=1 - [ERH_HUMAN]	40.38	1	3	4	18	1.52627e+06	0	1.22732e+06	2.00638e+06	6348734					0	12.5	2	3									25.52	10.58	1	2	4.82773	34.62	3	4					1.62716	17.31	2	2					1.81743	12.5
Q6STE5	SWI/SNF-related matrix-associated actin-dependent regulator of chromatin subfamily D member 3 OS=Homo sapiens GN=SMARCD3 PE=1 SV=1 - [SMRD3_HUMAN]	40.37	3	1	16	25	2.86992e+06	1.75555e+06	0	3.86238e+07	1.19343e+07					3.67258	7.66	2	3					0	8.9	3	3					1.79396	2.9	1	2					0	9.52	3	3					0	7.04
P13010	X-ray repair cross-complementing protein 5 OS=Homo sapiens GN=XRCC5 PE=1 SV=3 - [XRCC5_HUMAN]	40.3	5	11	26	124	1.26293e+06	1.83511e+06	1.29867e+06	8.8375e+06	1.84706e+07	125.86	5.05	3	5	16.0017	8.88	5	8	129.177	7.79	4	7	19.4897	13.93	7	12	142.687	10.79	5	7	31.9387	18.44	10	16	131.436	4.37	3	6	13.5817	7.51	5	8	118.52	6.28	3	5	12.2721	18.85
Q13217	DnaJ homolog subfamily C member 3 OS=Homo sapiens GN=DNAJC3 PE=1 SV=1 - [DNJC3_HUMAN]	40.28	1	2	15	24	8.47021e+06	1.39643e+06	587286	1.92603e+07	6.88817e+07					0	14.48	3	3					1.65825	13.69	4	5					0	16.07	4	4					0	2.38	1	1					0	1.79
Q96EK7	Constitutive coactivator of peroxisome proliferator-activated receptor gamma OS=Homo sapiens GN=FAM120B PE=1 SV=1 - [F120B_HUMAN]	40.22	5	1	32	51	1.29435e+06	661570	1.25896e+06	6.90328e+07	2.06068e+07					0	4.62	3	3					0	12.2	5	5					0	12.09	5	6					0	18.57	10	12					5.39386	15.71
Q71F23	Centromere protein U OS=Homo sapiens GN=MLF1IP PE=1 SV=1 - [CENPU_HUMAN]	40.19	2	1	14	35	865583	1.08414e+06	713191	4.24277e+06	1.00617e+07					1.94888	8.37	4	5					0	7.42	3	3					0	12.68	3	3					3.49967	8.37	4	5					3.83065	8.85
E9PE48	Uncharacterized protein OS=Homo sapiens GN=ASL PE=3 SV=1 - [E9PE48_HUMAN]	40.18	5	5	16	42	0	0	1.09703e+06	2.37731e+07	1.50327e+07													0	2.51	1	1					0	7.53	2	2					0	13.93	3	4					0	10.05
Q9Y266	Nuclear migration protein nudC OS=Homo sapiens GN=NUDC PE=1 SV=1 - [NUDC_HUMAN]	40.18	1	4	11	45	0	2.87137e+06	0	1.24323e+07	3.50359e+07													0	11.78	3	4									32	3.02	1	1	2.06304	9.97	3	5	48.1	3.02	1	2	4.04348	14.8
Q00325-2	Isoform B of Phosphate carrier protein, mitochondrial OS=Homo sapiens GN=SLC25A3 - [MPCP_HUMAN]	40.17	6	8	12	156	5.03663e+06	4.62472e+06	2.7363e+06	1.49424e+08	1.46941e+08	45.68	7.2	3	6	17.222	14.4	4	8	62.9856	11.08	4	10	22.9493	18.28	5	11	50.97	9.14	3	7	18.6992	16.34	4	9	127.973	15.51	6	14	38.342	18.56	7	18	165.691	18.01	7	20	43.6977	20.5
O75409	Huntingtin-interacting protein M OS=Homo sapiens GN=CXorf27 PE=1 SV=2 - [HYPM_HUMAN]	40.17	1	1	5	15	0	1.48546e+07	1.49727e+07	6.96182e+07	1.13995e+08					0	5.13	1	1					0	5.13	1	2					0	23.08	2	3					0	11.97	2	3					0	11.97
Q7Z4W1	L-xylulose reductase OS=Homo sapiens GN=DCXR PE=1 SV=2 - [DCXR_HUMAN]	40.16	1	8	10	77	63256.7	0	0	2.94685e+07	2.62572e+07					0	16.39	2	2																	145.09	30.33	6	13	24.3539	30.33	6	13	97.47	29.51	6	11	20.216	29.51
Q14914	Prostaglandin reductase 1 OS=Homo sapiens GN=PTGR1 PE=1 SV=2 - [PTGR1_HUMAN]	40.12	5	3	9	27	0	0	0	970187	1.98692e+07																													0	3.04	1	1					1.72138	12.16
P49189	4-trimethylaminobutyraldehyde dehydrogenase OS=Homo sapiens GN=ALDH9A1 PE=1 SV=3 - [AL9A1_HUMAN]	40.08	2	6	22	46	2.49002e+07	0	3.86322e+06	1.80307e+08	1.39305e+08					2.26031	10.32	2	3					1.89433	9.51	3	3	88.4164	5.06	2	3	2.70428	13.77	5	7					1.64239	17.81	5	5					0	12.35
P15088	Mast cell carboxypeptidase A OS=Homo sapiens GN=CPA3 PE=1 SV=2 - [CBPA3_HUMAN]	40.05	1	2	18	58	3.0252e+07	7.96511e+07	362594	1.36858e+07	4.47075e+07	77.6115	8.15	4	6	9.56142	10.55	4	6	81.37	4.8	2	3	6.08529	7.67	3	4	55.1421	5.28	2	3	2.89782	8.39	3	4	116.788	5.28	2	4	7.24035	8.87	4	6	112.008	5.28	2	4	13.409	25.9
Q13418	Integrin-linked protein kinase OS=Homo sapiens GN=ILK PE=1 SV=2 - [ILK_HUMAN]	40.04	5	7	17	64	2.35452e+06	550671	568523	9.42311e+06	9.6399e+06					2.62466	19.03	7	9					2.2297	6.42	3	3					3.34744	3.32	3	4	54.79	7.96	3	4	5.99467	10.62	4	6	100.22	11.06	4	9	17.7679	14.82
Q15836	Vesicle-associated membrane protein 3 OS=Homo sapiens GN=VAMP3 PE=1 SV=3 - [VAMP3_HUMAN]	40	1	1	3	40	1.26374e+06	2.42075e+06	2.0535e+06	3.13266e+07	3.07023e+07	108.317	24	2	3	7.70004	17	1	2	121.38	17	1	2	8.04691	17	1	2	139.953	17	1	3	10.9708	17	1	3	250.744	33	2	4	15.5351	33	2	4	217.97	33	2	4	16.3827	33
Q9UHG3	Prenylcysteine oxidase 1 OS=Homo sapiens GN=PCYOX1 PE=1 SV=3 - [PCYOX_HUMAN]	40	7	14	17	197	1.63518e+06	1.92091e+06	1.3509e+06	3.73544e+07	2.80021e+07	256.41	16.83	6	9	29.0651	16.83	6	10	316.382	15.64	7	12	32.3012	23.56	10	16	200.97	17.62	7	12	37.3008	24.55	9	16	228.29	21.98	10	18	40.8166	21.98	10	18	270.771	15.84	7	15	38.1885	19.21
Q13825-2	Isoform 2 of Methylglutaconyl-CoA hydratase, mitochondrial OS=Homo sapiens GN=AUH - [AUHM_HUMAN]	40	2	2	11	19	5.6501e+06	0	0	5.42013e+07	8.05952e+07					0	4.52	1	2													0	4.52	1	1					0	4.52	1	1					0	10.32
Q8WXF5-2	Isoform 2 of Gamma-crystallin N OS=Homo sapiens GN=CRYGN - [CRGN_HUMAN]	40	1	1	3	5	217198	1.29182e+06	0	0	0					0	14.4	1	1					0	19.2	1	2					2.64666	25.6	2	2
F8WAI1	Uncharacterized protein OS=Homo sapiens GN=IGFN1 PE=4 SV=1 - [F8WAI1_HUMAN]	39.97	1	1	101	218	1.03909e+07	2.83892e+07	7.02963e+06	7.03047e+07	3.12784e+08	22.68	0.59	2	2	7.50355	11.68	21	31					3.48795	14.64	24	28					0	11.06	20	26					1.77155	12.57	24	34					7.55893	14.64
P51659	Peroxisomal multifunctional enzyme type 2 OS=Homo sapiens GN=HSD17B4 PE=1 SV=3 - [DHB4_HUMAN]	39.95	7	7	20	66	1.57005e+06	843829	530430	3.95985e+06	7.79342e+06	137.101	5.3	3	6	16.0932	12.23	5	8	170.853	7.2	3	6	20.2835	10.6	5	9	181.78	7.2	3	6	22.8216	12.77	4	7					0	13.99	5	5					0	10.87
B4DR31	Uncharacterized protein OS=Homo sapiens GN=DPYSL2 PE=2 SV=1 - [B4DR31_HUMAN]	39.93	7	10	16	129	1.30212e+06	1.36025e+06	876259	1.38693e+08	2.46138e+07	152.63	11.19	4	6	17.1647	12.5	4	6	196.997	9.33	3	7	24.8175	11.01	3	7	135.412	14.18	5	9	18.6327	11.19	4	7	280.737	20.15	8	15	36.81	25.56	9	19	268.05	14.93	6	11	29.7751	19.96
O95292	Vesicle-associated membrane protein-associated protein B/C OS=Homo sapiens GN=VAPB PE=1 SV=3 - [VAPB_HUMAN]	39.92	4	6	10	58	635350	975988	1.15252e+06	4.55018e+07	6.58559e+07					1.78246	10.29	3	7					5.10452	12.76	4	7					0	8.23	2	2	49.6	5.35	2	3	6.14046	13.99	3	4	38.23	5.35	2	3	5.45272	18.52
Q9HDC9	Adipocyte plasma membrane-associated protein OS=Homo sapiens GN=APMAP PE=1 SV=2 - [APMAP_HUMAN]	39.9	2	7	11	95	1.73151e+06	1.62322e+06	1.53427e+06	2.33099e+07	2.24769e+07	43.43	19.47	5	6	16.5486	19.47	5	9	40.13	12.98	4	7	18.9194	15.63	5	10	65.7	10.82	3	5	16.3392	23.32	6	9	55.41	20.91	6	10	16.6938	20.91	6	9	108.137	20.43	6	10	20.7033	21.15
O95379	Tumor necrosis factor alpha-induced protein 8 OS=Homo sapiens GN=TNFAIP8 PE=2 SV=1 - [TFIP8_HUMAN]	39.9	5	1	5	9	675030	0	0	0	0					0	13.64	1	1													0	9.6	1	1
F5H3A1	Uncharacterized protein OS=Homo sapiens GN=ATP1A1 PE=3 SV=1 - [F5H3A1_HUMAN]	39.88	23	28	43	485	3.38754e+06	7.76522e+06	2.86448e+06	6.7155e+07	8.2086e+07	565.393	14.27	12	20	63.6717	15.44	14	24	623.895	16.03	13	25	77.7209	22.78	16	29	587.51	15.35	12	21	65.192	17.79	13	22	847.268	28.84	25	46	108.505	33.04	32	58	990.959	30.5	27	49	107.472	32.65
Q13162	Peroxiredoxin-4 OS=Homo sapiens GN=PRDX4 PE=1 SV=1 - [PRDX4_HUMAN]	39.85	4	5	11	100	2.02211e+06	1.52908e+06	717443	5.1173e+07	5.31716e+07	40.16	10.7	3	3	2.59927	15.87	4	5	31.1567	9.59	2	3	8.55807	21.03	5	8					5.67559	8.12	2	3	243.354	22.51	6	13	30.107	25.46	8	16	162.124	19.93	5	11	26.9163	26.94
Q00610-2	Isoform 2 of Clathrin heavy chain 1 OS=Homo sapiens GN=CLTC - [CLH1_HUMAN]	39.84	4	41	57	431	2.51625e+06	2.67839e+06	1.57417e+06	1.67596e+08	4.82621e+07	504.681	10.31	12	18	58.292	16.29	18	26	661.917	10.98	13	22	67.3995	13.48	17	28	649.452	12.75	15	24	81.9584	14.7	17	28	1078.77	19.16	27	48	114.918	21.05	32	56	971.72	19.46	25	46	116.036	21.72
B4DP64	Uncharacterized protein OS=Homo sapiens GN=LYPLA1 PE=2 SV=1 - [B4DP64_HUMAN]	39.8	5	1	5	8	0	0	0	0	8.3937e+06													0	11.73	1	1																					0	18.88
O95202	LETM1 and EF-hand domain-containing protein 1, mitochondrial OS=Homo sapiens GN=LETM1 PE=1 SV=1 - [LETM1_HUMAN]	39.78	4	10	25	113	753109	1.76052e+06	172310	1.67312e+07	1.45375e+07					0	3.52	3	4					0	9.74	5	6	37.13	1.62	1	2	4.15707	2.57	2	3	163.55	8.93	4	7	21.9057	14.48	8	15	155.41	6.9	3	5	17.9679	12.86
P62191	26S protease regulatory subunit 4 OS=Homo sapiens GN=PSMC1 PE=1 SV=1 - [PRS4_HUMAN]	39.77	2	3	14	29	514114	1.63552e+06	0	0	7.0827e+06					1.6841	13.64	4	5					0	15.45	3	3					0	7.73	2	2	20.74	3.41	1	1	2.36882	3.41	1	1					0	4.09
Q9NYL9	Tropomodulin-3 OS=Homo sapiens GN=TMOD3 PE=1 SV=1 - [TMOD3_HUMAN]	39.77	3	5	13	59	726269	1.08237e+06	6.6549e+06	3.59774e+07	3.24676e+07					0	1.99	1	2	83.12	3.69	1	2	4.93541	16.76	5	7	39.46	6.53	2	2	2.14659	8.81	3	3	89.29	5.97	2	4	10.8618	15.34	5	8	36.97	5.97	2	3	7.7027	22.73
P02654	Apolipoprotein C-I OS=Homo sapiens GN=APOC1 PE=1 SV=1 - [APOC1_HUMAN]	39.76	1	3	6	21	0	0	0	3.71486e+06	4.69875e+06					0	13.25	1	1																	25.31	24.1	2	4	8.20134	39.76	3	5	28.13	24.1	2	3	5.94875	24.1
P26599	Polypyrimidine tract-binding protein 1 OS=Homo sapiens GN=PTBP1 PE=1 SV=1 - [PTBP1_HUMAN]	39.74	11	6	13	92	1.94967e+07	2.03348e+07	1.95805e+06	1.47419e+07	1.7669e+07	32.52	5.65	2	4	6.01783	12.43	5	10					2.16539	12.99	5	7					8.06385	5.65	2	4	34.6233	10.55	3	4	9.17567	12.43	4	5	54.75	12.43	4	6	10.8067	15.44
Q6DD88	Atlastin-3 OS=Homo sapiens GN=ATL3 PE=1 SV=1 - [ATLA3_HUMAN]	39.74	4	11	18	122	3.40368e+07	3.93764e+07	1.15131e+06	1.49699e+07	4.86366e+08	284.49	13.68	4	6	23.8077	19.59	7	11	310.717	13.68	4	6	25.3085	18.3	6	10	312.094	11.65	4	8	31.8646	22.18	9	13	193.58	16.45	7	11	23.3421	22.37	8	12	189.754	14.97	6	10	21.7384	19.04
Q5T5C7	Seryl-tRNA synthetase OS=Homo sapiens GN=SARS PE=2 SV=1 - [Q5T5C7_HUMAN]	39.74	2	3	19	38	1.95233e+06	392845	2.0457e+06	2.58023e+07	1.14726e+07					0	9.51	4	5					0	7.84	3	3					0	9.14	3	5	0	1.31	1	1	1.99648	6.9	4	4	41.78	5.04	2	3	4.21275	5.22
Q3SY37	CMA1 protein OS=Homo sapiens GN=CMA1 PE=2 SV=1 - [Q3SY37_HUMAN]	39.71	2	1	4	29	1.02009e+06	1.46385e+06	509372	2.05658e+07	3.20705e+07					2.07072	34.56	3	4	36.64	11.03	1	2	7.72549	27.94	2	5	37.86	11.03	1	2	5.42571	11.03	1	2	60.48	11.03	1	2	6.64582	11.03	1	2	59.8967	11.03	1	4	11.7161	17.65
P01562	Interferon alpha-1/13 OS=Homo sapiens GN=IFNA1 PE=1 SV=1 - [IFNA1_HUMAN]	39.68	2	1	7	16	1.05338e+08	8.32978e+06	0	7.92324e+06	4.08575e+07					0	10.58	2	2					0	14.81	3	4													0	6.88	1	1					0	24.34
P17752	Tryptophan 5-hydroxylase 1 OS=Homo sapiens GN=TPH1 PE=1 SV=4 - [TPH1_HUMAN]	39.64	4	1	14	28	2.34882e+06	3.20589e+06	2.00807e+06	1.24466e+07	1.35078e+08					0	2.03	1	2					0	5.18	2	2					1.66866	15.99	4	4					0	10.81	4	4					0	10.14
P84103	Serine/arginine-rich splicing factor 3 OS=Homo sapiens GN=SRSF3 PE=1 SV=1 - [SRSF3_HUMAN]	39.63	7	1	8	33	2.29691e+07	9.97893e+06	4.66347e+06	7.48696e+07	20335038					0	4.88	1	2					0	9.76	3	5					0	9.15	2	5	79.68	8.54	1	2	4.53206	27.44	5	7	77.18	8.54	1	2	4.67956	13.41
P11908	Ribose-phosphate pyrophosphokinase 2 OS=Homo sapiens GN=PRPS2 PE=1 SV=2 - [PRPS2_HUMAN]	39.62	4	1	10	19	313310	0	0	1.41276e+07	2.50432e+06	25.96	4.72	1	1	2.3058	16.35	3	4									27.9	4.72	1	1	3.20705	4.72	1	1					0	13.84	3	3					3.85104	27.67
Q9BWJ5	Splicing factor 3B subunit 5 OS=Homo sapiens GN=SF3B5 PE=1 SV=1 - [SF3B5_HUMAN]	39.53	1	1	3	3	0	0	0	0	151406					0	24.42	1	1													0	12.79	1	1													0	26.74
Q9NUQ9	Protein FAM49B OS=Homo sapiens GN=FAM49B PE=1 SV=1 - [FA49B_HUMAN]	39.51	10	3	10	25	0	679356	0	6.09237e+07	0					0	6.17	1	1					0	3.09	1	1					1.64409	9.57	2	2	49.3	4.01	1	1	7.73584	26.23	5	7					2.73811	5.86
A5YVE9	Mitochondrial PDHA1 OS=Homo sapiens GN=PDHA1 PE=2 SV=1 - [A5YVE9_HUMAN]	39.49	9	5	17	70	702798	978344	591830	7.87988e+06	1.8765e+07	39.87	2.1	1	2	3.97774	5.37	2	3	54.1877	2.1	1	2	6.19351	8.18	3	4	36.26	2.1	1	2	6.31482	10.28	2	3					0	4.91	2	4	48.73	3.97	2	2	4.29053	14.25
Q32MZ4	Leucine-rich repeat flightless-interacting protein 1 OS=Homo sapiens GN=LRRFIP1 PE=1 SV=2 - [LRRF1_HUMAN]	39.48	10	4	28	55	1.31105e+06	1.38585e+06	660649	2.90632e+07	2.43293e+07					1.63766	5.32	3	3					0	12.62	6	6					0	1.98	2	2	43.4767	3.96	3	5	0	10.52	7	10	25.52	3.96	4	4	0	5.32
P00390-2	Isoform Cytoplasmic of Glutathione reductase, mitochondrial OS=Homo sapiens GN=GSR - [GSHR_HUMAN]	39.46	6	6	12	37	0	8.45864e+06	0	2.03617e+07	1.71654e+07													0	2.51	1	1									86.65	15.45	6	9	12.43	16.7	6	9	82.2467	12.94	4	6	13.7759	20.04
P43034-2	Isoform 2 of Platelet-activating factor acetylhydrolase IB subunit alpha OS=Homo sapiens GN=PAFAH1B1 - [LIS1_HUMAN]	39.46	1	1	3	4	0	0	0	0	0																													0	21.09	1	1
Q5JTV8	Torsin-1A-interacting protein 1 OS=Homo sapiens GN=TOR1AIP1 PE=1 SV=2 - [TOIP1_HUMAN]	39.45	5	5	18	49	754395	846687	932273	8.90051e+07	4.34029e+07	43.56	3.95	2	2	3.17458	4.29	2	2	49.67	3.95	2	3	4.32805	2.23	1	2	47.41	2.23	1	2	4.80018	6.69	3	5	46.3067	8.58	4	6	12.4356	8.75	4	6	82.3	4.63	2	4	10.64	16.98
Q16363-2	Isoform 2 of Laminin subunit alpha-4 OS=Homo sapiens GN=LAMA4 - [LAMA4_HUMAN]	39.43	16	23	57	351	6.0884e+06	4.99398e+06	3.88118e+06	6.10426e+07	2.26149e+08	442.039	6.33	8	14	41.0388	12.39	15	28	440.668	10.08	15	27	52.4057	12.67	18	32	425.774	8.87	13	25	53.8663	15.69	22	39	697.562	11.07	17	36	77.2134	16.52	25	48	649.974	10.96	16	31	74.3983	16.19
Q00059	Transcription factor A, mitochondrial OS=Homo sapiens GN=TFAM PE=1 SV=1 - [TFAM_HUMAN]	39.43	2	3	11	26	545377	761309	1.27402e+07	2.01251e+06	3.92942e+06					0	2.85	1	2					0	19.11	3	3					0	5.28	1	1					0	2.44	1	1					0	10.57
Q8TBY8-2	Isoform 2 of Polyamine-modulated factor 1-binding protein 1 OS=Homo sapiens GN=PMFBP1 - [PMFBP_HUMAN]	39.42	3	1	41	76	1.72892e+06	1.60496e+06	2.079e+06	1.1042e+08	6.55498e+07					3.51943	8.74	7	9					3.5932	7.75	7	8					3.8294	8.54	7	8					1.98415	8.24	8	12					3.38801	3.67
Q96IZ0	PRKC apoptosis WT1 regulator protein OS=Homo sapiens GN=PAWR PE=1 SV=1 - [PAWR_HUMAN]	39.41	1	1	12	19	161558	0	5.19966e+06	2.98685e+07	5.42268e+07					4.25873	11.76	2	3													0	10	2	2					1.6336	16.18	4	4					1.90809	13.53
F5H5M8	Uncharacterized protein OS=Homo sapiens GN=TEKT3 PE=4 SV=1 - [F5H5M8_HUMAN]	39.38	1	1	6	7	0	0	923264	0	5.25041e+07					0	6.22	1	1													0	17.62	2	2					1.73214	15.03	2	2					0	7.25
E9PF41	Uncharacterized protein OS=Homo sapiens GN=ACTR2 PE=3 SV=1 - [E9PF41_HUMAN]	39.35	2	1	17	78	606336	4.54924e+06	3.33625e+06	6.53511e+07	6.39102e+07					0	13.53	4	4					5.38374	13.53	4	6					4.17472	13.28	6	6	129.06	11.03	4	8	20.7951	16.04	7	14	124.35	12.78	5	9	19.6792	23.31
Q2YDB7	Peptidyl-prolyl cis-trans isomerase OS=Homo sapiens GN=PPIF PE=2 SV=1 - [Q2YDB7_HUMAN]	39.35	2	1	3	8	0	0	0	3.82071e+06	1.65174e+06																													0	10.97	1	1					0	20.65
O00161	Synaptosomal-associated protein 23 OS=Homo sapiens GN=SNAP23 PE=1 SV=1 - [SNP23_HUMAN]	39.34	2	2	6	10	0	0	0	1.36061e+07	0													0	8.53	1	1													3.89587	9	2	2					0	16.11
P10997	Islet amyloid polypeptide OS=Homo sapiens GN=IAPP PE=1 SV=1 - [IAPP_HUMAN]	39.33	2	1	2	3	0	0	0	0	0
P49903	Selenide, water dikinase 1 OS=Homo sapiens GN=SEPHS1 PE=1 SV=2 - [SPS1_HUMAN]	39.29	5	3	10	18	1.24061e+06	342732	0	3.65936e+06	633556					0	3.57	1	1					0	3.83	1	1					0	5.1	2	2					2.47567	7.65	2	3					0	7.65
E9PC84	Uncharacterized protein OS=Homo sapiens GN=TNC PE=4 SV=1 - [E9PC84_HUMAN]	39.26	3	1	57	562	1.0455e+07	1.12126e+07	9.51852e+06	72974876	1.6286e+08	519.656	18.31	25	40	110.687	23.03	31	56	914.938	19.24	25	45	125.823	23.5	29	56	768.009	17.17	23	44	126.464	20.28	27	57	1120.58	20.59	29	55	149.002	24.27	34	69	900.165	21.06	28	49	137.036	24.43
P39023	60S ribosomal protein L3 OS=Homo sapiens GN=RPL3 PE=1 SV=2 - [RL3_HUMAN]	39.21	4	7	15	36	388960	0	788092	1.6478e+07	1.41223e+07					2.73104	9.68	2	2													3.43927	7.44	3	4	28.15	5.96	3	5	5.21799	10.42	5	7	34.78	7.94	4	6	7.07326	17.37
Q02978	Mitochondrial 2-oxoglutarate/malate carrier protein OS=Homo sapiens GN=SLC25A11 PE=1 SV=3 - [M2OM_HUMAN]	39.17	2	7	11	47	0	0	0	1.38418e+07	3.40326e+07					0	5.41	1	2					2.38735	7.64	1	1									40.8793	8.28	3	5	3.57343	18.47	6	8	21.24	11.15	4	5	5.15627	11.15
Q9BQ48	39S ribosomal protein L34, mitochondrial OS=Homo sapiens GN=MRPL34 PE=1 SV=1 - [RM34_HUMAN]	39.13	1	1	3	6	0	0	0	1.13811e+07	2.07998e+07																													0	8.7	1	2					0	19.57
Q92629	Delta-sarcoglycan OS=Homo sapiens GN=SGCD PE=1 SV=2 - [SGCD_HUMAN]	39.1	3	3	10	32	321857	0	318277	2.81934e+07	1.60666e+07	58.88	5.54	1	1	2.64253	5.54	1	1					0	7.96	1	1	32.48	5.54	1	1	2.12144	5.54	1	1	226.08	16.26	4	6	13.2233	30.1	7	9	167.11	15.92	4	5	11.8317	18.34
F5H5P2	Uncharacterized protein OS=Homo sapiens PE=4 SV=1 - [F5H5P2_HUMAN]	39.04	5	2	16	28	0	0	0	1.87264e+06	1.22059e+08					0	13.99	3	4					0	5.85	1	1					0	5.85	2	2					0	8.98	3	4					0	6.05
P50502	Hsc70-interacting protein OS=Homo sapiens GN=ST13 PE=1 SV=2 - [F10A1_HUMAN]	39.02	7	6	17	43	1.44714e+06	1.67092e+06	0	2.08074e+07	1.00158e+07					0	20.33	6	6					0	1.63	1	1									32.55	3.79	1	1	7.02784	13.82	5	6	0	6.78	3	3	3.88077	11.65
Q14697	Neutral alpha-glucosidase AB OS=Homo sapiens GN=GANAB PE=1 SV=3 - [GANAB_HUMAN]	38.98	5	27	32	272	1.61343e+06	1.80829e+06	1.5756e+06	2.60752e+07	1.98803e+07	318.018	13.77	9	17	46.8758	21.5	12	21	282.664	11.33	8	13	38.0662	14.62	10	16	326.524	11.23	8	13	38.5538	13.35	9	15	432.64	15.78	11	18	58.8813	16	11	23	330.783	18.86	13	24	59.1117	19.81
B2ZZ83	Filamin B OS=Homo sapiens GN=FLNB PE=2 SV=1 - [B2ZZ83_HUMAN]	38.97	10	31	86	485	9.24981e+06	9.50091e+06	7.06317e+06	2.45487e+08	1.52664e+08	602.584	7.71	16	31	73.285	10.94	21	41	526.28	7.14	14	31	78.5716	13.63	22	41	386.668	5.81	13	25	68.5986	10.1	20	34	575.837	7.44	17	31	60.8481	12.5	26	43	372.745	7.33	18	32	58.48	15.8
Q00341	Vigilin OS=Homo sapiens GN=HDLBP PE=1 SV=2 - [VIGLN_HUMAN]	38.96	18	13	43	121	278196	5.14405e+06	4.59822e+06	8.27892e+07	2.33075e+07					0	4.26	4	5	27.94	5.68	5	9	5.03714	9.31	8	8	40.53	4.02	4	7	5.22106	3.55	3	3	32.76	2.6	3	5	5.897	7.49	7	10	91.24	2.84	3	5	10.2053	7.41
P18463	HLA class I histocompatibility antigen, B-37 alpha chain OS=Homo sapiens GN=HLA-B PE=2 SV=1 - [1B37_HUMAN]	38.95	11	0	13	160	7.36442e+06	5.92162e+06	4.38351e+06	6.42357e+07	6.43557e+07	172.398	26.8	9	18	29.6964	23.48	7	16	209.927	23.48	7	13	33.5334	21.82	6	13	216.865	27.9	9	16	30.714	26.24	8	15	254.218	19.89	5	10	34.1411	23.76	6	12	289.417	19.89	5	12	41.1636	27.62
P25815	Protein S100-P OS=Homo sapiens GN=S100P PE=1 SV=2 - [S100P_HUMAN]	38.95	1	2	3	34	4.80783e+06	2.39552e+06	4.92022e+06	1.08141e+07	1.03911e+07	100.02	13.68	1	2	6.96201	13.68	1	2	47.47	21.05	2	4	13.2659	38.95	3	6	99.32	13.68	1	2	6.68451	13.68	1	2	66.51	13.68	1	2	5.5039	13.68	1	2	91.88	13.68	1	2	5.73302	13.68
Q96HN2	Putative adenosylhomocysteinase 3 OS=Homo sapiens GN=AHCYL2 PE=1 SV=1 - [SAHH3_HUMAN]	38.95	9	4	19	62	514075	755310	1.16622e+06	3.86795e+07	2.767e+07					0	3.27	2	2	25.32	4.58	3	3	1.73538	8.51	3	3	22.99	1.96	1	2	3.53348	11.78	5	7	90.4667	5.89	3	4	12.4807	13.75	6	9	51.69	3.27	2	3	4.99678	12.44
Q9UGI8	Testin OS=Homo sapiens GN=TES PE=1 SV=1 - [TES_HUMAN]	38.95	4	5	15	30	615280	1.13949e+06	1.37009e+06	5.20673e+06	5.20557e+06					0	2.38	1	2					1.71778	11.4	4	5					5.48829	12.35	4	7					1.69103	9.5	3	4					2.39818	2.85
Q969Z3-2	Isoform 2 of MOSC domain-containing protein 2, mitochondrial OS=Homo sapiens GN=MOSC2 - [MOSC2_HUMAN]	38.91	2	2	11	23	0	0	0	936614	0					0	3.5	1	1					0	4.28	1	1					0	9.34	2	4					2.15934	6.61	1	2					0	17.51
P67809	Nuclease-sensitive element-binding protein 1 OS=Homo sapiens GN=YBX1 PE=1 SV=3 - [YBOX1_HUMAN]	38.89	7	6	9	58	0	892815	713191	3.4794e+06	0	70.8667	9.88	2	4	11.3173	16.05	3	6	80.37	5.25	1	2	8.8562	15.12	3	5	101.352	15.74	3	4	14.2404	21.91	4	6	36.85	10.49	2	2	5.39485	10.49	2	2
Q96LM6	Protein TSC21 OS=Homo sapiens GN=TSC21 PE=2 SV=1 - [TSC21_HUMAN]	38.89	1	1	6	12	1.14955e+07	0	0	4.81327e+06	2.08361e+07					0	3.33	1	2																					0	24.44	3	3	0	3.33	1	2	1.61232	20
E7EQZ9	Uncharacterized protein OS=Homo sapiens GN=PRKCSH PE=4 SV=1 - [E7EQZ9_HUMAN]	38.88	9	18	22	248	1.5845e+06	1.78241e+06	1.48403e+06	6.1003e+07	5.74393e+07	129.877	16.26	6	9	27.6536	19.81	7	11	213.178	19.81	7	11	32.5128	21.12	8	13	177.587	13.64	6	9	21.7191	18.69	8	11	333.948	27.1	14	27	52.793	30.84	15	28	411.82	22.06	10	22	48.0289	29.53
P30837	Aldehyde dehydrogenase X, mitochondrial OS=Homo sapiens GN=ALDH1B1 PE=1 SV=3 - [AL1B1_HUMAN]	38.88	2	6	18	49	527541	1.47309e+06	392016	2.0948e+07	1.65892e+07					0	2.9	1	1					0	5.61	3	3	20.95	4.64	2	2	5.0242	4.64	2	3	136.114	10.25	4	6	18.3371	15.09	6	10	225.765	11.61	4	5	20.8194	19.92
Q9C075	Keratin, type I cytoskeletal 23 OS=Homo sapiens GN=KRT23 PE=1 SV=2 - [K1C23_HUMAN]	38.86	1	1	13	19	0	0	1.21174e+06	9.65838e+06	6.91975e+08					1.6722	3.32	1	1					0	1.9	1	2					0	2.13	1	1					0	8.77	3	3					0	8.77
Q8TAT5	Endonuclease 8-like 3 OS=Homo sapiens GN=NEIL3 PE=1 SV=3 - [NEIL3_HUMAN]	38.84	1	1	15	23	997712	578366	4.87674e+06	4.36045e+06	5.0285e+06					0	2.31	1	1					0	10.08	3	3					0	8.76	3	3					0	1.82	1	2					3.39964	9.42
Q9Y3Z3	SAM domain and HD domain-containing protein 1 OS=Homo sapiens GN=SAMHD1 PE=1 SV=2 - [SAMH1_HUMAN]	38.82	2	5	27	56	0	0	615297	1.92455e+07	2.3765e+07					1.65455	5.11	3	3					3.82725	8.47	3	4					2.05397	4.31	2	3	26.9	3.99	2	2	2.69243	19.97	9	11					2.03348	15.02
P10412	Histone H1.4 OS=Homo sapiens GN=HIST1H1E PE=1 SV=2 - [H14_HUMAN]	38.81	3	1	11	108	2.0364e+06	1.35023e+06	1.10731e+06	3.05253e+08	2.71423e+08	32.73	13.24	3	4	5.8304	13.24	3	4	49.48	5.02	1	2	5.08994	9.13	2	5	64.7	5.02	1	2	5.0623	5.02	1	2	250.093	26.94	6	19	42.717	34.7	8	20	211.433	26.94	6	15	33.2583	23.74
O95715	C-X-C motif chemokine 14 OS=Homo sapiens GN=CXCL14 PE=1 SV=2 - [CXL14_HUMAN]	38.74	1	1	6	14	0	372711	0	1.17429e+08	4.73165e+07													0	6.31	1	1													0	7.21	1	2	0	12.61	2	3	1.78175	18.02
P52565	Rho GDP-dissociation inhibitor 1 OS=Homo sapiens GN=ARHGDIA PE=1 SV=3 - [GDIR1_HUMAN]	38.73	2	7	12	102	0	940481	941311	2.61757e+07	2.82397e+07	54.3933	7.35	1	3	15.1542	14.71	2	6	79.59	10.78	2	6	10.6921	10.78	2	5	21.15	10.78	2	2	4.56514	14.71	2	3	168.38	20.59	3	5	16.9156	32.35	6	12	163.25	20.59	3	6	15.6619	29.41
Q7KZI7-8	Isoform 8 of Serine/threonine-protein kinase MARK2 OS=Homo sapiens GN=MARK2 - [MARK2_HUMAN]	38.64	16	2	22	47	1.09626e+06	1.5251e+06	376831	1.40569e+07	1.04084e+07					2.26367	14.12	5	9					1.64923	13.09	7	11					0	7.06	4	6					0	5.26	4	5					0	7.19
Q9Y282	Endoplasmic reticulum-Golgi intermediate compartment protein 3 OS=Homo sapiens GN=ERGIC3 PE=1 SV=1 - [ERGI3_HUMAN]	38.64	4	1	10	20	608719	0	29412	1.72632e+07	2.3605e+06					0	3.66	1	4													0	15.4	3	4					0	9.4	3	3					0	17.75
Q96BN8	Protein FAM105B OS=Homo sapiens GN=FAM105B PE=1 SV=3 - [F105B_HUMAN]	38.64	1	1	13	33	0	905031	6.1087e+06	0	1.13868e+07													0	8.24	3	4	0	5.11	2	5	5.10691	23.86	7	9					0	12.78	2	2					1.67982	15.34
F8W785	Uncharacterized protein OS=Homo sapiens GN=GOLIM4 PE=4 SV=1 - [F8W785_HUMAN]	38.62	2	3	26	40	5.18758e+06	3.32738e+07	731318	2.66987e+07	1.0069e+07					0	11.23	4	5					0	8.53	4	4					3.31185	5.69	3	3					1.98702	9.58	6	6					1.8755	5.54
P61160	Actin-related protein 2 OS=Homo sapiens GN=ACTR2 PE=1 SV=1 - [ARP2_HUMAN]	38.58	2	1	16	77	693951	1.97967e+06	723145	2.65663e+07	3.45345e+07					0	10.15	3	3					2.08665	12.44	3	3					4.17472	12.18	4	4	129.06	11.17	4	8	20.7951	19.54	6	12	124.35	12.94	5	9	19.6792	23.1
B4DU58	Uncharacterized protein OS=Homo sapiens GN=CAPG PE=2 SV=1 - [B4DU58_HUMAN]	38.53	5	6	10	84	1.0884e+06	2.92386e+06	2.31064e+06	4.11826e+07	3.38826e+07	33.91	14.37	3	4	11.3521	19.88	5	7	76.8533	17.43	4	8	16.0656	22.02	4	9	52.27	21.1	5	8	15.1953	28.75	6	10	94.9667	15.9	4	7	13.0481	22.02	4	7	99.34	14.37	3	4	12.0704	22.02
P02790	Hemopexin OS=Homo sapiens GN=HPX PE=1 SV=2 - [HEMO_HUMAN]	38.53	9	10	18	101	991003	697219	0	2.17166e+07	2.37486e+07					0	6.71	2	3					0	9.09	3	4									139.62	15.15	8	17	27.2203	17.53	9	18	114.903	10.61	6	14	22.3157	16.67
P09382	Galectin-1 OS=Homo sapiens GN=LGALS1 PE=1 SV=2 - [LEG1_HUMAN]	38.52	2	5	6	174	2.31141e+07	2.27686e+07	1.89235e+07	7.37589e+07	7.80209e+07	340.388	37.04	5	18	37.9993	37.04	5	20	400.212	37.04	5	18	40.8398	37.04	5	18	371.897	37.04	5	13	31.6242	37.04	5	15	191.73	37.04	5	13	17.974	37.04	5	14	179.646	31.11	4	8	14.1264	32.59
A8MTX4	Uncharacterized protein OS=Homo sapiens GN=B9D1 PE=4 SV=1 - [A8MTX4_HUMAN]	38.51	4	1	5	7	1.79864e+07	0	503214	0	113911178					0	6.83	1	1					0	6.83	1	1					0	28.57	2	2													0	13.04
Q9NRN7	L-aminoadipate-semialdehyde dehydrogenase-phosphopantetheinyl transferase OS=Homo sapiens GN=AASDHPPT PE=1 SV=2 - [ADPPT_HUMAN]	38.51	1	1	10	12	0	975193	1.42786e+06	0	0													0	18.45	3	3					3.54061	13.92	3	4
Q15365	Poly(rC)-binding protein 1 OS=Homo sapiens GN=PCBP1 PE=1 SV=2 - [PCBP1_HUMAN]	38.48	24	3	10	88	0	2.7543e+06	2.00496e+06	2.91307e+07	2.06633e+07	91.28	5.62	1	2	9.81858	14.33	2	3	123.897	12.08	2	3	9.37119	12.08	2	4	114.21	7.87	2	3	8.78537	14.04	3	4	146.523	11.52	3	6	20.0719	13.76	4	7	132.903	13.76	4	8	18.0837	13.76
O60701	UDP-glucose 6-dehydrogenase OS=Homo sapiens GN=UGDH PE=1 SV=1 - [UGDH_HUMAN]	38.46	8	3	14	32	0	1.37005e+07	798025	0	9.01572e+07					4.61307	5.47	1	3					4.27373	7.89	2	3					2.42865	7.09	2	3					0	7.69	2	2					4.39932	18.22
Q9UBB5	Methyl-CpG-binding domain protein 2 OS=Homo sapiens GN=MBD2 PE=1 SV=1 - [MBD2_HUMAN]	38.44	2	1	12	18	5.25895e+06	574894	972927	742273	1.6897e+07					0	17.76	4	4					0	9.98	2	2					1.62186	12.17	2	3					0	1.46	1	1					0	16.79
Q9BUP3-3	Isoform 3 of Oxidoreductase HTATIP2 OS=Homo sapiens GN=HTATIP2 - [HTAI2_HUMAN]	38.41	4	1	9	9	831056	1.68619e+06	0	3.61898e+06	1.56934e+07					0	6.52	2	2					0	12.68	2	2													0	6.88	1	1					0	12.68
B4DH25	Uncharacterized protein OS=Homo sapiens GN=DCUN1D4 PE=2 SV=1 - [B4DH25_HUMAN]	38.39	4	1	9	9	89112	1.93169e+06	0	1.29371e+07	0					0	19.64	2	2					0	4.17	1	1													0	2.08	1	1
Q00688	Peptidyl-prolyl cis-trans isomerase FKBP3 OS=Homo sapiens GN=FKBP3 PE=1 SV=1 - [FKBP3_HUMAN]	38.39	1	4	8	27	0	250128	0	3.6893e+07	5.47463e+06													0	4.91	1	1													0	8.48	2	2					1.8251	4.91
Q5R372-8	Isoform 8 of Rab GTPase-activating protein 1-like OS=Homo sapiens GN=RABGAP1L - [RBG1L_HUMAN]	38.38	6	1	16	26	195010	797159	2.36054e+06	4122179	6700155					3.80174	14.05	4	5					1.89948	11.89	4	5					3.38134	13.51	5	6					1.83174	4.59	2	2					0	12.16
P62249	40S ribosomal protein S16 OS=Homo sapiens GN=RPS16 PE=1 SV=2 - [RS16_HUMAN]	38.36	2	5	6	36	1.79287e+06	827780	825521	1.20333e+07	1.10068e+07	41.81	11.64	2	4	7.86689	11.64	2	4	53.17	6.85	1	2	4.24419	6.85	1	2	53.74	6.85	1	2	4.48036	6.85	1	2	49.28	15.07	2	3	6.15837	15.07	2	3	56.03	12.33	2	3	6.42963	17.81
B4DV79	Uncharacterized protein OS=Homo sapiens GN=EIF3B PE=2 SV=1 - [B4DV79_HUMAN]	38.35	5	2	27	81	1.04099e+07	9.72913e+06	7.29025e+06	1.59065e+07	1.7673e+08					4.01425	19.11	8	8	45.62	1.9	1	2	10.7249	13.69	7	11	48.29	1.9	1	2	6.03386	11.25	5	7	101.38	1.9	1	3	11.1138	14.91	8	13	60.75	2.71	2	3	6.25793	13.41
P30043	Flavin reductase OS=Homo sapiens GN=BLVRB PE=1 SV=3 - [BLVRB_HUMAN]	38.35	1	2	5	23	1.2186e+06	845503	0	12195863	4.74206e+06					0	16.5	1	1	127.33	10.19	2	3	5.50673	7.28	1	2									32.87	6.8	1	2	3.34332	6.8	1	2	43.49	7.28	1	1	2.87648	13.59
Q9NX63	Coiled-coil-helix-coiled-coil-helix domain-containing protein 3, mitochondrial OS=Homo sapiens GN=CHCHD3 PE=1 SV=1 - [CHCH3_HUMAN]	38.33	4	4	12	67	1.3634e+06	1.38189e+06	1.15658e+06	36577337	5.76458e+06	179.75	14.98	3	5	16.7421	14.98	3	5	182.63	11.45	2	4	14.6869	11.45	2	4	201.71	11.45	2	4	15.4531	16.74	4	6	97.5033	11.45	2	3	8.66293	16.3	3	4	144.72	14.98	3	5	11.4971	21.59
B4DG39	Glucose-6-phosphate isomerase OS=Homo sapiens GN=GPI PE=2 SV=1 - [B4DG39_HUMAN]	38.31	3	13	25	161	636342	1.86702e+06	6.29978e+07	32153218	4.00695e+07	129.04	6.15	3	6	13.7494	9.49	4	7	141.269	5.27	2	4	10.0747	8.44	3	6	122.83	5.1	3	5	8.16144	10.19	5	6	280.665	13.88	7	16	35.0653	19.51	12	25	253.543	22.5	11	20	31.4889	30.23
P35270	Sepiapterin reductase OS=Homo sapiens GN=SPR PE=1 SV=1 - [SPRE_HUMAN]	38.31	1	4	9	22	6.96865e+06	0	5.32921e+06	5347072	6.31484e+07					0	4.6	1	1													0	3.45	1	2					0	3.83	1	1	126.17	11.11	2	2	7.13798	13.79
Q15287-2	Isoform 2 of RNA-binding protein with serine-rich domain 1 OS=Homo sapiens GN=RNPS1 - [RNPS1_HUMAN]	38.3	3	1	7	13	0	0	0	0	8.64906e+06	26.71	5.32	1	1	2.46588	15.6	2	2													0	10.28	1	1													0	9.93
P55010	Eukaryotic translation initiation factor 5 OS=Homo sapiens GN=EIF5 PE=1 SV=2 - [IF5_HUMAN]	38.28	1	1	17	41	0	8.88353e+06	1.53529e+06	2.1387e+08	1.98848e+08													0	7.89	3	4					0	7.42	2	3					0	9.28	4	5					1.68005	16.24
F8VS27	Uncharacterized protein OS=Homo sapiens GN=TSFM PE=4 SV=1 - [F8VS27_HUMAN]	38.26	7	1	10	26	979568	2.24973e+06	1.6518e+06	3.34499e+07	4.53029e+07					1.87961	13.91	2	2					3.73919	10	3	4					1.76197	5.22	1	2					3.66621	12.61	3	3					1.85383	8.7
P46782	40S ribosomal protein S5 OS=Homo sapiens GN=RPS5 PE=1 SV=4 - [RS5_HUMAN]	38.24	1	2	8	22	1.71285e+06	1.21437e+06	1.5563e+06	3.81201e+07	0	29.81	4.41	1	2	3.60347	4.41	1	2	51.26	14.22	2	3	5.57925	21.08	3	4	69.3033	14.22	2	3	3.79597	14.71	3	4					0	8.33	2	2
Q9BRJ2	39S ribosomal protein L45, mitochondrial OS=Homo sapiens GN=MRPL45 PE=1 SV=2 - [RM45_HUMAN]	38.24	1	1	13	27	3.4175e+06	2.87738e+06	0	77254150	1.19376e+07					0	22.88	5	5					0	15.69	3	3					0	10.46	2	2					0	6.86	1	3					0	13.07
Q5JSH3-2	Isoform 2 of WD repeat-containing protein 44 OS=Homo sapiens GN=WDR44 - [WDR44_HUMAN]	38.23	4	2	22	59	4.73222e+06	2.39819e+06	4.51702e+06	775213	4.3317e+07					1.66184	7.07	5	6					2.0738	16.24	7	10					0	11.05	7	10					0	12.82	6	6					0	10.61
A7E2U8	UPF0602 protein C4orf47 OS=Homo sapiens GN=C4orf47 PE=2 SV=1 - [CD047_HUMAN]	38.19	1	1	12	22	747567	0	1.19839e+06	1.83763e+07	1.41292e+07					0	11.33	2	2					2.70462	21.04	3	3					0	8.09	2	2					0	13.27	3	3					0	6.15
O75396	Vesicle-trafficking protein SEC22b OS=Homo sapiens GN=SEC22B PE=1 SV=4 - [SC22B_HUMAN]	38.14	1	7	8	127	2.337e+06	1.55852e+06	1.37207e+06	2.27333e+07	1.92122e+07	179.353	22.79	4	8	26.0745	31.63	6	12	126.815	18.14	3	5	15.8391	21.86	4	7	231.591	19.07	3	6	21.254	19.07	3	6	175.971	27.91	5	11	30.0408	27.91	5	11	139.68	23.26	4	7	20.976	33.49
Q9BUF5	Tubulin beta-6 chain OS=Homo sapiens GN=TUBB6 PE=1 SV=1 - [TBB6_HUMAN]	38.12	3	2	13	133	1.61888e+06	1.21315e+06	1.12687e+06	99571734	8.79558e+07	221.087	18.39	5	7	20.6073	18.39	5	7	200.289	16.14	4	6	19.0756	18.39	5	6	120.23	14.35	4	5	19.205	23.77	6	9	293.124	17.94	6	20	50.9439	17.94	6	18	291.392	17.94	6	21	51.9039	19.96
F5H711	Uncharacterized protein OS=Homo sapiens GN=JAGN1 PE=4 SV=1 - [F5H711_HUMAN]	38.12	2	1	9	26	0	539326	322236	9.22387e+06	1.0421e+07					1.75178	15.47	2	2	26.48	6.63	1	1	2.62214	15.47	2	2	31.48	6.63	1	1	2.27841	27.62	5	5	77.78	6.63	1	2	7.91884	17.13	3	5	72.2	6.63	1	2	6.45949	7.18
D6RD47	Uncharacterized protein OS=Homo sapiens GN=RPS23 PE=3 SV=1 - [D6RD47_HUMAN]	38.06	2	1	5	7	0	0	0	0	7.80618e+07																																					0	11.94
O14745	Na(+)/H(+) exchange regulatory cofactor NHE-RF1 OS=Homo sapiens GN=SLC9A3R1 PE=1 SV=4 - [NHRF1_HUMAN]	37.99	3	7	13	65	2.18678e+06	2.51223e+06	2.36366e+06	4.26492e+07	2.57606e+07					0	6.42	3	4					1.66618	6.42	3	5					0	3.63	2	2	28.5	15.08	5	7	9.26207	25.98	8	13	22.89	5.59	2	3	4.12872	10.34
Q5Y7A7	HLA class II histocompatibility antigen, DRB1-13 beta chain OS=Homo sapiens GN=HLA-DRB1 PE=1 SV=1 - [2B1D_HUMAN]	37.97	20	1	8	46	1.872e+06	1.92371e+06	1.56234e+06	30982563	5.71667e+07	92.3367	6.39	1	3	10.1821	15.04	2	5	89.37	6.39	1	4	8.94466	6.39	1	4	64.7267	6.39	1	3	10.2622	6.39	1	3	52.3	7.14	2	4	8.06738	17.67	3	5	72.65	7.14	2	5	10.7149	9.77
P01619	Ig kappa chain V-III region B6 OS=Homo sapiens PE=1 SV=1 - [KV301_HUMAN]	37.96	1	1	4	57	570756	2.80837e+06	385806	2.09456e+07	1.98165e+07	114.615	23.15	3	6					112.333	23.15	3	8	0	6.48	1	1	103.747	23.15	3	8	0	6.48	1	2	105.818	23.15	3	8	0	6.48	1	2	69.9629	23.15	3	7	0	6.48
P04156	Major prion protein OS=Homo sapiens GN=PRNP PE=1 SV=1 - [PRIO_HUMAN]	37.94	3	1	6	11	65542.9	0	670309	0	1.8678e+07					0	5.53	1	1													0	13.44	2	3					0	21.34	2	2					0	18.97
Q969X5	Endoplasmic reticulum-Golgi intermediate compartment protein 1 OS=Homo sapiens GN=ERGIC1 PE=1 SV=1 - [ERGI1_HUMAN]	37.93	6	6	8	74	1.93483e+06	930235	1.60796e+06	1.48745e+07	1.27274e+07	62.85	17.59	2	3	8.2538	27.24	4	5	43.5767	22.41	3	5	11.2613	22.41	3	5					9.18675	22.41	3	5	28.62	18.62	4	7	8.71744	19.31	4	6	82.9	22.41	5	8	13.4032	20.69
Q9UNX3	60S ribosomal protein L26-like 1 OS=Homo sapiens GN=RPL26L1 PE=1 SV=1 - [RL26L_HUMAN]	37.93	4	2	6	14	0	409165	144447	0	39519918													0	7.59	1	1	0	6.21	1	1									1.63514	8.28	1	2					0	8.28
Q13576	Ras GTPase-activating-like protein IQGAP2 OS=Homo sapiens GN=IQGAP2 PE=1 SV=4 - [IQGA2_HUMAN]	37.9	10	28	55	221	1.16706e+07	9.31318e+06	1.27201e+07	2.60844e+07	7.68403e+07					5.71922	4.51	7	10					1.7486	4.38	5	6					2.32958	4.13	5	5	528.497	14.67	20	31	74.5762	16.63	24	38	657.468	13.27	19	30	65.9689	18.22
P20930	Filaggrin OS=Homo sapiens GN=FLG PE=1 SV=3 - [FILA_HUMAN]	37.87	1	11	72	139	742300	1.01394e+06	1.69505e+06	3.90098e+07	4.38512e+07					0	6.03	8	12					2.0019	4.43	9	11					1.8052	11.48	15	18					0	10.81	14	16					1.8376	12.48
P21980	Protein-glutamine gamma-glutamyltransferase 2 OS=Homo sapiens GN=TGM2 PE=1 SV=2 - [TGM2_HUMAN]	37.85	8	17	21	320	6.15625e+06	1.42711e+07	4.73687e+06	8.27846e+07	7.07623e+07	460.141	28.09	15	33	78.7145	26.93	14	34	302.68	25.62	14	25	57.9148	25.47	15	31	388.735	24.45	13	31	72.5032	25.62	14	36	581.984	26.93	14	30	74.1972	33.48	18	36	486.18	23.29	13	26	61.1266	29.84
P02787	Serotransferrin OS=Homo sapiens GN=TF PE=1 SV=3 - [TRFE_HUMAN]	37.82	2	12	21	150	701660	1.02584e+06	2.24671e+06	2.29296e+07	2.17051e+07	101.25	6.16	3	5	12.4018	10.03	5	7	83.9971	7.88	4	7	14.629	16.05	9	13	106.307	11.03	6	8	18.9609	19.34	11	15	117.835	10.32	6	10	12.597	14.33	8	14	133.305	7.88	5	9	14.3882	17.34
Q6UXB2	VEGF co-regulated chemokine 1 OS=Homo sapiens GN=CXCL17 PE=1 SV=1 - [VCC1_HUMAN]	37.82	1	1	5	8	0	0	1.43261e+06	0	1.31421e+07													0	10.92	1	1					0	21.85	2	3					1.82667	7.56	1	1					0	8.4
F5H8K4	Uncharacterized protein OS=Homo sapiens GN=PSMD3 PE=4 SV=1 - [F5H8K4_HUMAN]	37.81	3	2	17	48	1.28967e+06	14980	2.76765e+06	13120653	1.13849e+07					1.66018	7.29	2	2					2.17893	12.28	4	4	89.13	4.8	2	3	5.42068	15.16	5	7	104.59	4.41	2	3	6.16989	10.56	4	5	134.72	4.41	2	3	7.13267	6.72
Q9NZN8-5	Isoform 5 of CCR4-NOT transcription complex subunit 2 OS=Homo sapiens GN=CNOT2 - [CNOT2_HUMAN]	37.76	10	1	13	30	0	923154	1.2033e+06	1.62214e+07	2.89677e+07													0	13.27	3	3					0	11.02	4	4					2.08317	11.02	4	6					1.78853	12.86
C9JGP9	Uncharacterized protein OS=Homo sapiens GN=NDUFA10 PE=4 SV=2 - [C9JGP9_HUMAN]	37.75	6	3	15	43	323398	8.90138e+06	0	2.88346e+06	2.89624e+06	32.5	3.94	1	2	4.87545	6.2	2	3	82.43	10.14	2	2	8.42769	17.75	5	6					0	8.45	2	2	89.2425	14.08	4	4	9.32196	15.21	4	4	60.55	8.45	2	4	11.4995	12.96
P62277	40S ribosomal protein S13 OS=Homo sapiens GN=RPS13 PE=1 SV=2 - [RS13_HUMAN]	37.75	2	2	6	16	0	0	295997	9.00385e+06	5.29878e+06																					0	16.56	2	2					0	18.54	3	5					0	19.87
B1ANR0	Poly(A) binding protein, cytoplasmic 4 (Inducible form) OS=Homo sapiens GN=PABPC4 PE=4 SV=1 - [B1ANR0_HUMAN]	37.72	9	2	20	41	0	1.30863e+06	1.92725e+06	1.51548e+08	2.92731e+07					0	7.8	3	4					0	1.3	1	2	20.32	4.23	2	2	2.589	14.15	6	7					0	7.8	4	5					0	6.83
Q9Y265	RuvB-like 1 OS=Homo sapiens GN=RUVBL1 PE=1 SV=1 - [RUVB1_HUMAN]	37.72	3	1	11	19	1.53171e+07	0	0	1.11106e+07	4.12216e+06					0	5.04	1	1	53.42	3.07	1	1	3.28824	9.43	2	2	54.62	3.07	1	1	5.93216	3.07	1	2					0	9.65	2	2					0	7.89
Q9Y2X3	Nucleolar protein 58 OS=Homo sapiens GN=NOP58 PE=1 SV=1 - [NOP58_HUMAN]	37.62	1	4	14	32	376548	2.47581e+06	706381	1.71301e+07	3.78163e+06					0	8.13	2	2					2.65033	12.29	3	3					0	7.37	2	2	27.48	3.97	2	2	2.3225	10.78	4	6					2.09271	9.83
P00492	Hypoxanthine-guanine phosphoribosyltransferase OS=Homo sapiens GN=HPRT1 PE=1 SV=2 - [HPRT_HUMAN]	37.61	1	2	6	8	0	0	0	4.40231e+06	2.77149e+06													0	8.26	1	1													1.80269	22.02	3	3					2.28836	16.06
P38606	V-type proton ATPase catalytic subunit A OS=Homo sapiens GN=ATP6V1A PE=1 SV=2 - [VATA_HUMAN]	37.6	4	3	21	49	0	355879	713896	2.35693e+07	4.50387e+07					0	6.65	2	2					2.87991	11.02	3	5					0	6.65	2	2	33.09	2.76	2	2	7.68484	22.2	10	13	17.28	5.02	2	2	2.91838	15.4
P16949	Stathmin OS=Homo sapiens GN=STMN1 PE=1 SV=3 - [STMN1_HUMAN]	37.58	6	1	8	31	1.10091e+06	984625	1.52704e+06	29541015	2.43104e+07					3.41307	15.44	3	6					1.83002	22.82	4	6					1.68318	4.7	1	2					0	6.71	1	2					0	16.11
P25311	Zinc-alpha-2-glycoprotein OS=Homo sapiens GN=AZGP1 PE=1 SV=2 - [ZA2G_HUMAN]	37.58	2	1	10	19	0	0	1.86251e+06	2.50632e+07	2.58978e+07					0	8.05	1	2					0	8.05	1	1					0	3.69	1	1					4.03853	14.09	4	6					0	11.74
P16152	Carbonyl reductase [NADPH] 1 OS=Homo sapiens GN=CBR1 PE=1 SV=3 - [CBR1_HUMAN]	37.55	5	5	8	53	667599	0	1.95656e+07	1.06491e+07	1.32188e+07					0	5.42	1	1													0	5.05	1	1	195.457	22.74	5	9	25.2398	22.74	5	11	149.444	15.88	3	5	17.463	15.88
D6RER5	Uncharacterized protein OS=Homo sapiens GN=SEPT11 PE=3 SV=1 - [D6RER5_HUMAN]	37.5	17	3	14	36	3.17031e+06	3.77975e+06	834724	5.4089e+07	9.42872e+06	35.72	11.11	3	3	5.99986	15.51	4	5	62.5295	8.56	3	3	5.49872	14.35	5	5	67.01	4.4	1	1	4.37455	11.11	4	4					2.0703	6.71	2	3	28.53	2.08	1	2	2.16097	5.32
F2Z2H1	Uncharacterized protein OS=Homo sapiens GN=MOV10L1 PE=4 SV=1 - [F2Z2H1_HUMAN]	37.5	1	1	2	3	501983	0	0	0	0					0	37.5	2	2
E9PFP3	Uncharacterized protein OS=Homo sapiens GN=LSP1 PE=4 SV=1 - [E9PFP3_HUMAN]	37.47	8	6	12	75	2.57886e+06	1.67504e+06	2.05086e+06	2.54142e+07	3.44413e+07	97.5833	18.84	6	9	20.6211	21.41	6	9	97.61	9.64	2	5	8.4366	11.99	3	6	60.21	9.64	2	4	11.239	15.85	4	6	92.27	9.64	2	3	7.55783	11.56	3	4	138.59	12.85	3	5	14.9911	21.41
Q5T1B5	Inositol polyphosphate-5-phosphatase, 40kDa OS=Homo sapiens GN=INPP5A PE=2 SV=1 - [Q5T1B5_HUMAN]	37.47	6	1	13	20	2.46317e+06	340192	0	1.92521e+07	27243935					0	13.18	3	3					0	3.88	1	1					1.86344	4.13	1	1					0	9.56	2	2					1.86261	9.56
O14641	Segment polarity protein dishevelled homolog DVL-2 OS=Homo sapiens GN=DVL2 PE=1 SV=1 - [DVL2_HUMAN]	37.36	1	1	14	21	433486	0	2.18073e+06	1.61514e+07	2.44515e+07					1.85257	10.05	5	5													0	8.15	2	2					0	4.76	2	2					0	14.95
P14866	Heterogeneous nuclear ribonucleoprotein L OS=Homo sapiens GN=HNRNPL PE=1 SV=2 - [HNRPL_HUMAN]	37.35	4	6	12	49	383074	492006	252640	6.29316e+06	8.09926e+06	51.23	5.94	1	2	8.954	10.53	3	5					9.60394	10.36	2	3	52.5933	10.36	2	3	6.81191	13.58	3	4	21.62	1.87	1	2	3.68569	5.09	2	3					5.89558	10.19
P09669	Cytochrome c oxidase subunit 6C OS=Homo sapiens GN=COX6C PE=1 SV=2 - [COX6C_HUMAN]	37.33	1	5	7	53	591535	1.47847e+06	8.08649e+06	1.60512e+07	1.13407e+07					0	9.33	1	2	40.1514	18.67	2	2	1.96037	18.67	2	2	22.01	10.67	1	1	2.10206	36	5	6	17.36	20	2	3	0	20	2	3	24.5232	20	2	4	1.95649	20
P00488	Coagulation factor XIII A chain OS=Homo sapiens GN=F13A1 PE=1 SV=4 - [F13A_HUMAN]	37.3	4	15	23	192	6.77183e+06	1.09421e+07	2.98977e+06	4.29983e+07	5.10844e+07	191.548	8.47	5	7	16.5485	12.43	6	10	187.043	7.51	4	6	18.7025	13.11	7	9	214.594	9.7	5	8	23.9228	15.03	7	11	295.343	16.12	11	22	44.0862	24.18	15	28	320.276	13.93	9	20	37.8567	20.9
Q6URK8	Testis, prostate and placenta-expressed protein OS=Homo sapiens GN=TEPP PE=2 SV=3 - [TEPP_HUMAN]	37.27	2	1	7	41	1.71791e+07	8.32626e+06	1.46076e+07	7.68747e+07	1.06723e+08					3.53341	5.54	2	5					1.68108	13.65	3	5					3.33036	2.58	1	5	0	2.95	1	2	1.65472	20.66	4	10	29.2	5.54	2	3	0	5.54
Q14103-3	Isoform 3 of Heterogeneous nuclear ribonucleoprotein D0 OS=Homo sapiens GN=HNRNPD - [HNRPD_HUMAN]	37.25	10	5	11	78	4.29931e+06	1.30373e+06	1.02558e+06	1.05341e+07	1.00274e+07	202.477	18.95	4	6	18.9313	21.24	5	7	177.72	14.71	3	5	15.6963	14.71	3	5	163.451	14.71	3	6	14.593	20.59	4	6	154.336	15.69	4	8	18.1272	15.69	4	8	106.792	8.17	2	4	10.834	9.8
Q9BPX5	Actin-related protein 2/3 complex subunit 5-like protein OS=Homo sapiens GN=ARPC5L PE=1 SV=1 - [ARP5L_HUMAN]	37.25	1	3	5	16	0	0	0	0	4.37563e+07																																					0	16.34
Q53GQ0	Estradiol 17-beta-dehydrogenase 12 OS=Homo sapiens GN=HSD17B12 PE=1 SV=2 - [DHB12_HUMAN]	37.18	3	10	10	131	2.6382e+06	2.62743e+06	6.48004e+06	3.15271e+07	2.72615e+07	154.593	12.5	3	7	20.4507	24.04	5	10	168.584	20.51	4	9	24.2513	20.83	4	9	145.59	14.42	4	6	16.7132	25.96	6	10	73.3635	23.08	7	12	23.6844	20.83	6	15	56.3043	23.08	7	13	27.5248	23.72
B1AJZ9	Forkhead-associated domain-containing protein 1 OS=Homo sapiens GN=FHAD1 PE=2 SV=2 - [FHAD1_HUMAN]	37.18	5	2	55	101	3.58845e+06	2.06211e+06	5.40543e+06	1.04933e+08	7.40026e+07					3.80934	7.86	8	9					0	4.46	5	7					1.74275	6.3	8	8					0	9.21	11	13					5.13074	12.75
Q14696	LDLR chaperone MESD OS=Homo sapiens GN=MESDC2 PE=1 SV=2 - [MESD_HUMAN]	37.18	1	1	10	21	0	0	0	1.09015e+08	1.15224e+07													0	5.56	1	1					0	4.7	1	1					1.88355	25.64	6	6					0	9.4
O75475	PC4 and SFRS1-interacting protein OS=Homo sapiens GN=PSIP1 PE=1 SV=1 - [PSIP1_HUMAN]	37.17	2	2	18	49	9.93572e+06	1.41968e+07	326314	1.66627e+07	1.5481e+07	26.37	2.45	1	1	3.93422	14.34	5	5	58.98	2.45	1	2	4.81038	8.49	3	5	44.47	2.45	1	2	5.42488	12.45	4	5					3.85403	8.11	5	8					2.15218	11.7
P08253	72 kDa type IV collagenase OS=Homo sapiens GN=MMP2 PE=1 SV=2 - [MMP2_HUMAN]	37.12	3	2	15	20	0	1.74171e+07	914399	7.64969e+06	6609884									0	1.21	1	1	0	9.24	3	3					0	9.7	4	4					2.0375	6.67	3	3					0	10.15
Q9C0I3	Protein FAM190A OS=Homo sapiens GN=FAM190A PE=2 SV=2 - [F190A_HUMAN]	37.11	3	1	21	33	1.69241e+06	3.18703e+06	2.4394e+06	5.46173e+07	3.7134e+07					1.73589	15.33	6	6					0	3.11	1	1					0	5.67	2	2					0	5.89	2	3					0	12.56
Q9UL26	Ras-related protein Rab-22A OS=Homo sapiens GN=RAB22A PE=1 SV=2 - [RB22A_HUMAN]	37.11	1	1	7	16	1.0208e+06	1.29437e+06	466210	6.68378e+06	1.09066e+07					0	10.82	2	2					1.98765	10.31	2	4					4.27884	10.31	2	3					1.89464	6.7	1	1					1.77296	16.49
P31930	Cytochrome b-c1 complex subunit 1, mitochondrial OS=Homo sapiens GN=UQCRC1 PE=1 SV=3 - [QCR1_HUMAN]	37.08	4	13	16	125	3.00255e+06	3.66439e+06	2.4812e+06	7.96693e+06	2.34948e+07	196.47	10.21	4	8	22.7462	19.17	7	12	205.367	12.71	5	11	24.6823	16.67	6	12	162.403	8.13	3	8	23.3124	12.71	5	10	40.4265	3.33	2	4	8.1909	7.71	4	7	75.0054	9.58	6	10	13.6581	12.08
O95782-2	Isoform B of AP-2 complex subunit alpha-1 OS=Homo sapiens GN=AP2A1 - [AP2A1_HUMAN]	37.07	4	2	27	48	5.78871e+06	3.44281e+06	4.19654e+06	3.46854e+07	3.6064e+07					1.63984	8.9	5	6					4.34567	9.01	5	5					0	2.51	2	3	72.35	1.88	1	1	3.71941	8.9	7	10	64.8	3.04	2	2	9.82499	17.49
Q9UKF7	Cytoplasmic phosphatidylinositol transfer protein 1 OS=Homo sapiens GN=PITPNC1 PE=1 SV=2 - [PITC1_HUMAN]	37.05	4	1	12	21	0	667836	1.3124e+06	1.9593e+07	1.54153e+07													0	9.34	3	3					0	9.64	3	4					0	10.24	3	5					0	21.69
Q9Y697-2	Isoform Cytoplasmic of Cysteine desulfurase, mitochondrial OS=Homo sapiens GN=NFS1 - [NFS1_HUMAN]	37.03	6	2	11	26	694723	649368	634100	0	1.64509e+07					1.69119	6.8	2	2					1.66621	9.82	3	4					0	11.34	3	3					0	8.31	2	2					1.96897	11.59
E7EUU8	Uncharacterized protein OS=Homo sapiens GN=COMT PE=4 SV=1 - [E7EUU8_HUMAN]	37.02	4	1	7	20	366028	369122	0	2.13579e+07	32393027					0	20.85	3	3					4.54818	15.74	2	4	62.62	6.81	1	2	5.85643	15.74	2	3					0	11.91	2	2					0	20.85
Q9H0N0	Ras-related protein Rab-6C OS=Homo sapiens GN=RAB6C PE=2 SV=2 - [RAB6C_HUMAN]	37.01	1	1	7	18	0	0	0	2.11294e+07	9.93742e+07																													0	24.8	3	4					0	16.54
Q15691	Microtubule-associated protein RP/EB family member 1 OS=Homo sapiens GN=MAPRE1 PE=1 SV=3 - [MARE1_HUMAN]	36.94	1	3	9	16	74795	0	0	2.21306e+06	4.88003e+06					0	4.1	1	1													0	9.33	2	2	55.74	4.48	1	1	2.98067	11.19	2	2	68.78	4.48	1	1	3.62948	11.57
Q99417	C-Myc-binding protein OS=Homo sapiens GN=MYCBP PE=1 SV=3 - [MYCBP_HUMAN]	36.89	1	1	3	7	0	568448	521349	1269544	0													0	6.8	1	2					1.60265	6.8	1	1					0	10.68	1	1
E9PE77	Uncharacterized protein OS=Homo sapiens GN=FN1 PE=4 SV=1 - [E9PE77_HUMAN]	36.87	19	44	65	652	4.30966e+06	4.49914e+06	3.38231e+06	1.10123e+08	1.02222e+08	715.51	14.98	24	47	123.004	16.22	25	50	698.74	13.05	22	42	110.508	20.6	34	57	706.157	12.49	21	37	105.661	18.03	30	52	1235.74	20.77	35	77	186.891	24.81	42	88	1209.25	21.72	39	78	195.922	26.09
Q8N5Y2	Male-specific lethal 3 homolog OS=Homo sapiens GN=MSL3 PE=1 SV=1 - [MS3L1_HUMAN]	36.85	6	1	18	38	8.49065e+06	7.288e+06	1.89886e+07	2.92506e+07	2.37954e+07					0	8.45	4	5					0	5.57	3	3					0	7.68	3	4					0	8.83	5	8					1.91427	8.64
P06310	Ig kappa chain V-II region RPMI 6410 OS=Homo sapiens PE=4 SV=1 - [KV206_HUMAN]	36.84	4	1	5	37	1.59539e+06	2.88065e+06	1.308e+06	3.67233e+07	3.55338e+07	66.2106	9.77	1	2	6.80826	12.03	2	3	70.0206	9.77	1	2	5.41831	29.32	2	3	40.96	9.77	1	1	2.72223	9.77	1	2	65.5525	15.04	2	4	5.15774	15.04	3	6	59.3744	15.04	2	4	6.64932	15.04
Q9UL16	Coiled-coil domain-containing protein 19, mitochondrial OS=Homo sapiens GN=CCDC19 PE=1 SV=2 - [CCD19_HUMAN]	36.84	2	1	25	68	1.56811e+07	3.99028e+06	3.32102e+06	1.10173e+08	6.67773e+07					3.72227	11.43	6	9					4.98337	18.69	8	10	0	1.45	1	3	1.96465	13.07	6	9					3.58712	13.43	8	9					5.39732	16.7
P02452	Collagen alpha-1(I) chain OS=Homo sapiens GN=COL1A1 PE=1 SV=5 - [CO1A1_HUMAN]	36.82	1	13	37	333	4.49726e+07	4.65802e+07	2.48177e+07	4.41029e+08	3.98481e+08	272.712	8.61	10	21	41.7109	9.97	12	26	277.056	7.38	9	20	38.2758	10.31	11	23	282.186	6.01	7	18	31.6929	14	13	25	458.329	9.49	12	36	54.4639	12.91	15	40	505.602	10.25	13	36	63.9635	16.19
F5H1E1	Uncharacterized protein OS=Homo sapiens GN=COPE PE=4 SV=1 - [F5H1E1_HUMAN]	36.81	4	5	8	39	0	0	0	2.86966e+07	5926283																					0	5.54	1	1	100.27	9.12	2	2	5.71286	12.7	3	4	157.923	9.12	2	3	8.84103	9.12
B4DVG5	Uncharacterized protein OS=Homo sapiens GN=TINAGL1 PE=2 SV=1 - [B4DVG5_HUMAN]	36.8	2	1	12	38	663883	926760	1.28279e+06	2.38255e+07	2.68344e+07					0	7.61	3	5					2.33706	8.63	2	2					0	4.06	1	1	64.56	6.35	2	4	11.4219	21.32	6	10	71.0067	6.35	2	4	12.8364	13.2
O15382	Branched-chain-amino-acid aminotransferase, mitochondrial OS=Homo sapiens GN=BCAT2 PE=1 SV=2 - [BCAT2_HUMAN]	36.73	3	5	11	26	0	0	693393	1.87052e+06	1.65568e+07					1.84557	4.59	1	1					1.82919	4.59	1	1					0	3.06	1	1					0	2.04	1	1					2.27725	8.42
Q8TAX9-3	Isoform 3 of Gasdermin-B OS=Homo sapiens GN=GSDMB - [GSDMB_HUMAN]	36.72	7	1	13	26	615773	683327	0	1.35042e+07	5.5323e+06					1.63622	11.66	5	5					0	2.98	1	1					0	14.39	3	3					0	6.45	2	3					0	13.4
B4DLR8	Uncharacterized protein OS=Homo sapiens GN=NQO1 PE=2 SV=1 - [B4DLR8_HUMAN]	36.63	3	5	7	33	0	0	0	12385544	9.84451e+06					2.16234	6.44	1	1																	24.81	14.36	3	4	7.90629	10.4	2	3	57.07	10.4	2	4	10.4571	19.31
E9PHY5	Uncharacterized protein OS=Homo sapiens GN=EPB41L2 PE=4 SV=1 - [E9PHY5_HUMAN]	36.58	30	1	34	137	6.1937e+06	4.80904e+06	3.93785e+06	6.2893e+07	6.83533e+07					0	7.27	5	7	0	1.5	2	2	3.3785	9.41	8	10					5.24357	6.84	5	10	178.978	10.37	7	14	30.0356	18.4	14	24	209.217	9.2	7	12	27.5073	19.57
E7EVI2	Uncharacterized protein OS=Homo sapiens GN=FAM82B PE=4 SV=1 - [E7EVI2_HUMAN]	36.53	3	1	8	11	0	0	0	2.233e+06	0					0	12.18	2	2													0	12.18	2	2					0	6.27	2	2
Q9UHD8	Septin-9 OS=Homo sapiens GN=SEPT9 PE=1 SV=2 - [SEPT9_HUMAN]	36.52	10	8	18	81	720865	773801	538909	1.78268e+07	1.02553e+07	35.3934	5.29	3	5	3.4527	10.75	5	7					0	6.48	3	4	44.55	6.48	3	4	7.99176	12.46	5	6	36.9268	7.17	3	5	7.5843	12.97	5	7	88.9933	10.41	5	7	9.04034	13.14
P28066	Proteasome subunit alpha type-5 OS=Homo sapiens GN=PSMA5 PE=1 SV=3 - [PSA5_HUMAN]	36.51	2	5	7	21	0	0	377054	0	1.92681e+06																	46.4	4.98	1	1	3.59144	4.98	1	1									45.02	7.88	1	1	2.8582	7.88
P82094-2	Isoform 2 of TATA element modulatory factor OS=Homo sapiens GN=TMF1 - [TMF1_HUMAN]	36.5	5	1	35	71	2.03377e+07	954318	2.29772e+06	1.03605e+08	3.2512e+07					2.11007	5.93	3	3					3.95897	8.21	7	9					2.3712	8.03	6	6					3.41234	13.78	11	12					3.58662	14.05
E5RH51	Uncharacterized protein OS=Homo sapiens GN=C1orf212 PE=4 SV=1 - [E5RH51_HUMAN]	36.49	1	1	5	8	0	4.50714e+06	0	0	0													0	18.92	1	1																					0	8.11
Q9NY59	Sphingomyelin phosphodiesterase 3 OS=Homo sapiens GN=SMPD3 PE=1 SV=1 - [NSMA2_HUMAN]	36.49	1	1	13	21	0	1.74208e+06	6.93541e+06	8.22114e+06	1.74648e+06													0	3.82	2	3					0	5.19	1	1					1.61818	5.04	3	4					0	1.53
Q9Y315	Putative deoxyribose-phosphate aldolase OS=Homo sapiens GN=DERA PE=1 SV=2 - [DEOC_HUMAN]	36.48	2	1	9	19	0	0	0	0	1.21942e+07																					0	3.14	1	1					0	3.77	1	1					0	15.09
O15320-8	Isoform 9 of Cutaneous T-cell lymphoma-associated antigen 5 OS=Homo sapiens GN=CTAGE5 - [CTGE5_HUMAN]	36.46	9	1	23	57	533765	8.19717e+06	3.03558e+06	5.25546e+07	6.77863e+07	50.99	1.93	1	1	2.83793	11.19	4	5	25.37	1.93	1	1	5.72664	12.85	7	12					0	12.29	4	5					0	8.98	5	9					1.75716	14.5
P30462	HLA class I histocompatibility antigen, B-14 alpha chain OS=Homo sapiens GN=HLA-B PE=1 SV=1 - [1B14_HUMAN]	36.46	6	0	13	145	4.97014e+06	5.59139e+06	4.38351e+06	9.32662e+07	6.43557e+07	162.896	21.55	6	12	29.6964	19.89	5	13	201.252	21.55	6	11	33.5334	19.89	5	11	216.865	24.31	7	12	30.714	22.65	6	11	254.218	23.2	7	13	35.816	30.39	9	16	289.417	19.89	5	12	41.1636	23.76
B1APG4	Protein kinase, cAMP-dependent, catalytic, beta OS=Homo sapiens GN=PRKACB PE=2 SV=1 - [B1APG4_HUMAN]	36.45	18	2	9	22	379249	0	964365	9.64399e+06	5.50715e+06					0	7.17	1	2													0	9.66	2	4					1.67467	9.03	2	3					1.62601	12.15
Q9Y305	Acyl-coenzyme A thioesterase 9, mitochondrial OS=Homo sapiens GN=ACOT9 PE=1 SV=2 - [ACOT9_HUMAN]	36.45	3	1	10	15	0	1.31875e+06	2.62589e+06	6.85119e+07	2.56376e+07													0	1.59	1	1					0	3.42	1	1					0	8.43	3	4					0	12.98
O00139-2	Isoform 2 of Kinesin-like protein KIF2A OS=Homo sapiens GN=KIF2A - [KIF2A_HUMAN]	36.36	5	1	20	28	1.21589e+06	0	413946	6.61226e+07	2.81825e+07					1.60548	3.48	3	3					0	3.64	1	1					3.3352	4.55	2	3					0	14.24	6	6	0	1.97	2	3	0	5.3
Q8WWM9	Cytoglobin OS=Homo sapiens GN=CYGB PE=1 SV=1 - [CYGB_HUMAN]	36.32	1	1	9	14	461282	0	0	0	3.37511e+06					0	14.74	3	4					0	19.47	2	3													0	8.42	1	1					0	4.74
P19652	Alpha-1-acid glycoprotein 2 OS=Homo sapiens GN=ORM2 PE=1 SV=2 - [A1AG2_HUMAN]	36.32	1	2	7	22	0	2.20406e+06	0	3.40733e+07	2.31841e+07													0	3.48	1	2					1.72261	3.98	1	1	63.47	3.98	1	2	3.99522	3.98	1	2	52.87	3.98	1	2	3.85393	13.43
B7Z242	Uncharacterized protein OS=Homo sapiens GN=MAOB PE=2 SV=1 - [B7Z242_HUMAN]	36.31	3	8	16	91	1.11916e+06	1.29877e+06	1.46489e+06	1.60286e+07	1.42519e+07	101.797	14.48	5	9	23.6817	13.1	4	8	110.953	14.48	5	7	18.4973	17.06	6	9	115.518	14.48	5	7	19.999	19.25	7	10	100.93	8.53	4	7	10.514	10.71	5	7	144.209	9.92	4	7	14.6461	12.9
Q86SX6	Glutaredoxin-related protein 5, mitochondrial OS=Homo sapiens GN=GLRX5 PE=1 SV=2 - [GLRX5_HUMAN]	36.31	1	1	4	7	0	0	0	0	44079448																																					0	8.28
Q9NVD7	Alpha-parvin OS=Homo sapiens GN=PARVA PE=1 SV=1 - [PARVA_HUMAN]	36.29	15	6	13	87	3.63116e+06	2.21261e+06	1.8228e+06	5.0111e+07	4.51697e+07	30.66	3.76	1	1	5.67533	12.9	4	4	54.8493	11.83	3	4	11.4247	18.28	5	6	47.76	11.56	3	4	10.0665	11.56	3	4	195.83	16.67	6	9	22.3211	20.7	8	13	161.58	10.75	4	7	19.158	18.55
P22352	Glutathione peroxidase 3 OS=Homo sapiens GN=GPX3 PE=1 SV=2 - [GPX3_HUMAN]	36.28	2	4	9	56	1.18325e+06	1.35854e+06	0	2.09887e+07	2.11233e+07					4.58971	6.19	1	2	41.58	11.5	2	4	9.24886	11.5	2	4					1.7097	6.19	1	2	51.28	17.26	4	7	10.3237	24.78	5	8	24.89	17.26	4	7	10.6172	25.22
P21397	Amine oxidase [flavin-containing] A OS=Homo sapiens GN=MAOA PE=1 SV=1 - [AOFA_HUMAN]	36.24	2	8	20	102	1.33725e+06	1.51729e+06	1.2805e+06	3.28738e+07	4.69328e+07	35.52	2.09	1	2	3.95134	3.23	2	3	48.68	4.74	2	2	3.73643	7.97	4	4	44.4833	5.88	2	3	9.02584	8.54	3	4	65.9929	7.78	4	8	12.5066	11.95	6	9	104.052	7.59	4	6	8.79558	11.76
E9PR44	Uncharacterized protein OS=Homo sapiens GN=CRYAB PE=3 SV=1 - [E9PR44_HUMAN]	36.21	5	3	5	31	1.43567e+06	1.98466e+06	1.19628e+06	8.17686e+06	1.25521e+07					7.71489	21.26	2	3					1.61863	6.32	1	2	23.61	10.92	2	4	5.2291	10.92	2	3	32.8368	6.32	1	3	5.59328	15.52	3	5					0	6.32
Q9UNF0	Protein kinase C and casein kinase substrate in neurons protein 2 OS=Homo sapiens GN=PACSIN2 PE=1 SV=2 - [PACN2_HUMAN]	36.21	2	1	14	29	1.41048e+06	2.22902e+06	2.40869e+06	1.43477e+07	1.08057e+07					2.01555	13.17	4	4					3.92905	11.73	4	5					0	11.93	4	5					0	18.31	5	5					1.9001	10.91
Q9HAV0	Guanine nucleotide-binding protein subunit beta-4 OS=Homo sapiens GN=GNB4 PE=1 SV=3 - [GBB4_HUMAN]	36.18	6	2	9	77	5.84416e+06	6.63612e+06	5.74779e+06	8.4851e+07	85111086	63.4048	10	4	7	9.25843	13.53	4	6	103.134	12.06	5	9	13.6612	16.18	6	9	107.947	12.06	5	10	13.6426	20.29	4	7	101.9	11.18	4	6	12.8791	9.12	3	6	103.077	13.24	5	10	11.3179	9.12
P16219	Short-chain specific acyl-CoA dehydrogenase, mitochondrial OS=Homo sapiens GN=ACADS PE=1 SV=1 - [ACADS_HUMAN]	36.17	2	4	11	30	0	0	0	1.54769e+07	42514948	22.48	3.16	1	1	2.78619	5.34	2	2													0	3.16	1	1					0	9.71	3	3					1.68893	2.91
P16403	Histone H1.2 OS=Homo sapiens GN=HIST1H1C PE=1 SV=2 - [H12_HUMAN]	36.15	3	1	8	110	1.42098e+06	1.10257e+06	1.10731e+06	3.05253e+08	2.71423e+08	32.73	13.62	3	4	5.8304	17.84	4	5	49.48	9.39	2	3	7.23463	9.39	2	4	64.7	5.16	1	2	5.0623	5.16	1	2	249.933	27.7	6	19	44.826	24.41	6	19	211.433	27.7	6	15	35.3328	24.41
Q9UBE0	SUMO-activating enzyme subunit 1 OS=Homo sapiens GN=SAE1 PE=1 SV=1 - [SAE1_HUMAN]	36.13	3	1	10	19	1.61932e+06	2.12914e+06	4.28358e+06	6.3158e+07	5.4546e+06					0	12.43	3	4					0	10.4	2	2	0	4.34	2	2	0	3.18	1	2					0	5.49	2	2					0	6.65
Q9BUB1	PRKAR2A protein OS=Homo sapiens GN=PRKAR2A PE=2 SV=1 - [Q9BUB1_HUMAN]	36.13	3	2	10	28	0	0	0	4.10424e+07	3.24018e+07																					0	5.76	1	1	0	5.24	2	3	0	6.54	2	4	0	5.24	2	3	3.56664	3.14
Q9BYN8	28S ribosomal protein S26, mitochondrial OS=Homo sapiens GN=MRPS26 PE=1 SV=1 - [RT26_HUMAN]	36.1	1	1	8	34	6.12179e+06	929901	1.00635e+06	2.31192e+07	1.44063e+07					0	13.66	3	4					1.68562	8.29	2	3	0	4.88	1	1	3.4371	8.29	2	4					1.60731	24.88	5	6					1.71025	19.02
F8WA86	Uncharacterized protein OS=Homo sapiens GN=CNN3 PE=4 SV=1 - [F8WA86_HUMAN]	36.04	1	1	10	39	3.67789e+06	6.15996e+06	2.53652e+06	6.17147e+07	6.26056e+07					3.7158	6.36	2	3					1.6938	11.66	3	5					0	17.31	4	5					5.2083	9.89	3	7	20.6	3.53	1	2	3.77221	19.79
O75521	Enoyl-CoA delta isomerase 2, mitochondrial OS=Homo sapiens GN=ECI2 PE=1 SV=4 - [ECI2_HUMAN]	36.04	6	4	15	37	740868	2.28695e+06	2.96545e+06	4.98497e+06	4.70065e+06					0	11.93	3	3					1.65963	10.15	3	3					0	7.36	2	2	37.62	3.05	1	2	4.1507	3.05	1	2					0	11.42
Q96BM9	ADP-ribosylation factor-like protein 8A OS=Homo sapiens GN=ARL8A PE=1 SV=1 - [ARL8A_HUMAN]	36.02	3	2	6	35	1.74973e+06	1.38267e+06	856224	1.03409e+07	1.30379e+07	56.4754	16.13	2	3	8.86324	23.66	2	3	66.63	12.37	1	2	10.1356	12.37	1	2	62.23	12.37	1	1	5.3443	12.37	1	1	75.76	20.43	3	6	14.623	17.2	2	5	57.01	12.37	1	2	7.86793	16.13
B4DWN0	Uncharacterized protein OS=Homo sapiens GN=GIMAP4 PE=2 SV=1 - [B4DWN0_HUMAN]	36.02	2	2	10	24	763124	6.33504e+06	4.38966e+06	1.52964e+07	1.14905e+07					0	2.68	1	1	46.15	6.13	2	3	2.11903	14.56	4	5	45.7	6.13	2	2	2.22023	10.73	2	2					0	3.07	1	1					0	10.73
Q9NVI7-2	Isoform 2 of ATPase family AAA domain-containing protein 3A OS=Homo sapiens GN=ATAD3A - [ATD3A_HUMAN]	36.01	11	3	18	33	767671	0	955122	2.41046e+07	3.68104e+07					0	3.92	2	2													0	11.77	4	4					1.63154	10.41	5	7					7.47164	11.43
Q0VG06-2	Isoform 2 of Fanconi anemia-associated protein of 100 kDa OS=Homo sapiens GN=FAAP100 - [FP100_HUMAN]	35.97	2	1	8	35	485467	1.63164e+06	99886.6	1.18664e+08	5.08714e+07					2.15172	25.3	5	7					0	18.97	3	3					0	18.97	4	5					0	18.58	2	3					0	22.13
P05556	Integrin beta-1 OS=Homo sapiens GN=ITGB1 PE=1 SV=2 - [ITB1_HUMAN]	35.96	11	12	25	192	1.78279e+06	2.01351e+06	2.0828e+06	9.63762e+07	2.39493e+08	111.949	9.27	5	9	24.4775	17.29	9	14	123.139	7.14	4	9	20.8853	9.27	6	11	202.155	8.52	5	11	28.4897	12.03	7	13	271.062	13.91	10	23	32.3224	20.3	13	25	301.318	15.16	11	23	41.0277	24.44
Q12907	Vesicular integral-membrane protein VIP36 OS=Homo sapiens GN=LMAN2 PE=1 SV=1 - [LMAN2_HUMAN]	35.96	6	6	14	107	2.01058e+07	1.56199e+06	1.84146e+07	1.54158e+07	1.48257e+07	107.713	16.01	5	9	14.8387	15.73	4	9	138.025	14.89	4	10	22.3983	12.36	3	8	70.54	17.42	5	10	18.393	17.98	6	10	101.25	7.02	3	5	16.1375	12.36	4	8	157.47	14.04	5	8	16.5519	16.57
B4DDH2	Uncharacterized protein OS=Homo sapiens GN=STK33 PE=2 SV=1 - [B4DDH2_HUMAN]	35.94	4	1	17	25	1.36666e+07	1.35515e+06	0	3.88738e+06	1.55572e+06					1.66488	13.32	5	7					0	4.44	1	2					0	9.73	3	3					0	6.34	4	5					0	9.51
Q9P2W1	Homologous-pairing protein 2 homolog OS=Homo sapiens GN=PSMC3IP PE=1 SV=1 - [HOP2_HUMAN]	35.94	1	1	8	15	2.80567e+06	1.83565e+06	1.31194e+06	3.26797e+06	461376					0	2.76	1	2					0	14.29	2	3					0	18.43	3	3					0	9.22	2	3					0	3.23
F2Z3F9	Uncharacterized protein OS=Homo sapiens PE=4 SV=1 - [F2Z3F9_HUMAN]	35.92	1	1	6	12	5.59266e+06	0	4.64415e+06	2.68102e+07	39873552					0	15.49	2	2													0	4.23	1	2					1.98195	7.04	2	3					0	4.23
P62750	60S ribosomal protein L23a OS=Homo sapiens GN=RPL23A PE=1 SV=1 - [RL23A_HUMAN]	35.9	3	4	6	14	0	0	0	0	0					0	13.46	1	1																					0	5.13	1	1
P61158	Actin-related protein 3 OS=Homo sapiens GN=ACTR3 PE=1 SV=3 - [ARP3_HUMAN]	35.89	9	8	13	95	993732	4.76151e+06	511702	4.23353e+07	39879887	64.36	13.16	3	7	14.3311	13.16	3	7	76.11	13.16	3	4	9.3685	13.16	3	6	86.12	12.44	3	5	11.5447	19.62	5	9	100.323	13.64	5	8	17.5226	29.43	9	13	105.82	9.81	3	5	14.0212	18.66
P41219-2	Isoform 2 of Peripherin OS=Homo sapiens GN=PRPH - [PERI_HUMAN]	35.88	9	2	18	206	3.55315e+07	3.49801e+07	3.15197e+07	2.75504e+08	3.23655e+08	315.049	7.64	5	18	37.6909	12.31	7	20	358.288	9.34	6	21	39.028	18.05	8	22	313.435	7.64	5	18	37.6722	20.81	10	23	222.166	7.64	5	15	24.0349	9.55	5	15	168.281	8.49	4	12	19.8675	9.77
P78412	Iroquois-class homeodomain protein IRX-6 OS=Homo sapiens GN=IRX6 PE=2 SV=3 - [IRX6_HUMAN]	35.87	1	1	14	23	0	519830	0	1.60538e+09	1.39601e+07					0	3.14	1	1					1.73752	10.54	4	4					0	6.95	1	1					0	8.07	4	5					1.63328	11.43
P57105	Synaptojanin-2-binding protein OS=Homo sapiens GN=SYNJ2BP PE=1 SV=2 - [SYJ2B_HUMAN]	35.86	1	3	4	13	512927	0	0	0	0	48.45	9.66	1	1	4.50995	20.69	2	3
C9J6Q4	Uncharacterized protein OS=Homo sapiens GN=TM4SF18 PE=4 SV=1 - [C9J6Q4_HUMAN]	35.85	2	1	2	5	0	0	0	1.1268e+06	0																									58.13	9.43	1	2	5.50924	9.43	1	2
P16401	Histone H1.5 OS=Homo sapiens GN=HIST1H1B PE=1 SV=3 - [H15_HUMAN]	35.84	1	2	7	21	1.4439e+06	0	0	1.56919e+07	1.41525e+07	23.31	3.98	1	2	3.27471	13.72	3	4																	41.401	9.29	2	3	7.13913	14.6	3	4	59.94	9.29	2	3	5.0856	9.29
Q5T8A7	Protein KIAA0649 OS=Homo sapiens GN=KIAA0649 PE=1 SV=1 - [K0649_HUMAN]	35.81	1	1	31	55	4.09466e+06	517635	3.0244e+06	1.59676e+07	3.6382e+07					0	5.46	5	5					0	9.76	5	5					1.85233	15.55	9	9					0	3.31	4	8					2.11176	10.01
E9PDL6	Uncharacterized protein OS=Homo sapiens GN=NDRG1 PE=4 SV=2 - [E9PDL6_HUMAN]	35.8	14	2	8	18	332540	469515	283513	1.37806e+07	0					0	9.26	2	3					0	9.26	2	2					0	4.94	1	1					1.72112	12.04	2	2
E7EPQ3	Uncharacterized protein OS=Homo sapiens GN=MDM1 PE=4 SV=1 - [E7EPQ3_HUMAN]	35.79	4	1	22	43	436287	903050	2.4855e+06	5.49311e+07	6.4009e+07					0	8.69	4	4					0	8.25	3	3					0	12.67	6	8					0	5.6	4	4					0	8.54
Q9BUH6	Uncharacterized protein C9orf142 OS=Homo sapiens GN=C9orf142 PE=1 SV=2 - [CI142_HUMAN]	35.78	1	1	6	7	0	589988	0	1.7976e+07	0					0	7.84	1	1					0	7.84	1	1													0	27.94	4	4
Q15404	Ras suppressor protein 1 OS=Homo sapiens GN=RSU1 PE=1 SV=3 - [RSU1_HUMAN]	35.74	3	6	12	44	599170	1.70499e+06	0	8.23338e+06	1.41248e+07					0	2.17	1	1					1.68076	6.5	2	3					0	3.25	1	1	21.48	9.03	3	5	10.2338	14.44	4	8					3.79444	10.47
P16070-3	Isoform 3 of CD44 antigen OS=Homo sapiens GN=CD44 - [CD44_HUMAN]	35.72	18	6	14	100	1.14102e+06	3.59518e+06	1.07326e+06	8.00933e+07	7.70282e+07	118.062	3.38	2	3	9.43735	9	3	5	73.98	3.38	2	4	7.52641	9	3	5	122.26	3.38	2	4	10.2275	17.02	5	7	267.56	8.44	5	12	28.3045	16.74	7	13	267.15	8.44	5	12	29.4121	12.52
E9PH29	Uncharacterized protein OS=Homo sapiens GN=PRDX3 PE=4 SV=1 - [E9PH29_HUMAN]	35.71	2	6	8	155	2.63956e+06	1.93455e+06	1.83139e+06	5.54725e+07	5.73169e+07	152.27	13.45	3	6	10.3783	16.81	4	8	171.53	21.43	5	11	17.8314	21.43	5	10	183.544	22.69	5	9	20.7556	26.05	6	11	254.59	28.15	7	13	30.5313	33.61	7	15	179.32	26.05	6	12	22.8704	26.05
Q96EL3	39S ribosomal protein L53, mitochondrial OS=Homo sapiens GN=MRPL53 PE=1 SV=1 - [RM53_HUMAN]	35.71	1	1	5	29	1.11045e+06	1.78619e+06	1.04031e+06	4.88719e+07	2.1388e+07					0	12.5	1	1					0	12.5	1	2					0	27.68	2	3					0	14.29	2	3					0	15.18
P20338	Ras-related protein Rab-4A OS=Homo sapiens GN=RAB4A PE=1 SV=2 - [RAB4A_HUMAN]	35.68	30	1	6	68	3.15428e+06	4.035e+06	3.48093e+06	1.11434e+08	1.13498e+08	84.0882	8.45	2	4	4.27817	8.45	2	9	60.56	5.16	1	2	4.43508	8.45	2	4	79.51	8.45	2	4	4.70605	15.49	3	8	67.1741	8.45	2	6	6.77382	8.45	2	6	91.52	8.45	2	7	10.4211	8.45
B3KYA7	Uncharacterized protein OS=Homo sapiens GN=STK3 PE=2 SV=1 - [B3KYA7_HUMAN]	35.65	20	1	16	41	7.6787e+06	6.73894e+06	9.72765e+06	5.0085e+07	3.98926e+07	0	1.16	1	4	0	10.98	4	4	0	4.24	2	4	2.54545	10.21	3	3	0	4.62	2	4	0	5.97	1	1					0	8.86	2	2					0	8.48
A7YIJ8	Radixin isoform b OS=Homo sapiens GN=RDX PE=2 SV=1 - [A7YIJ8_HUMAN]	35.6	7	2	29	188	2.53774e+06	1.90541e+06	2.36118e+06	1.78529e+08	1.49326e+08	63.5833	6.13	5	10	19.9974	9.44	8	16	46.1615	7.28	6	11	16.5448	9.93	7	12	48.66	7.28	5	8	17.6596	12.42	8	13	83.1849	11.26	9	13	20.6565	16.23	10	16	62.705	9.44	8	12	16.2522	14.9
Q92878	DNA repair protein RAD50 OS=Homo sapiens GN=RAD50 PE=1 SV=1 - [RAD50_HUMAN]	35.59	5	1	51	100	2.08407e+06	7.04547e+06	1.35479e+06	5.76034e+07	5.41638e+07					5.12846	7.85	8	9					3.33398	6.25	8	9					1.6972	4.12	5	6					2.02099	13.34	16	19					5.81678	15.32
Q9H4A6	Golgi phosphoprotein 3 OS=Homo sapiens GN=GOLPH3 PE=1 SV=1 - [GOLP3_HUMAN]	35.57	2	1	11	34	2.70953e+07	380104	1.51472e+07	9.63054e+07	2.96956e+08	58.53	5.37	1	2	7.15878	11.41	4	7	60.18	5.37	1	1	7.25968	8.05	3	4					2.71736	13.09	3	4	46.43	5.37	1	1	8.80743	16.78	4	5					1.90047	9.73
P08708	40S ribosomal protein S17 OS=Homo sapiens GN=RPS17 PE=1 SV=2 - [RS17_HUMAN]	35.56	1	3	5	36	38421257	4.29637e+07	3.72798e+07	1.17751e+07	9.0078e+06	40.5819	4.44	1	5	1.69643	4.44	1	2	39.8573	4.44	1	4	1.93517	4.44	1	3	37.1554	4.44	1	2					47.4215	11.85	2	4	0	17.78	3	4	36.37	4.44	1	2	0	4.44
P01024	Complement C3 OS=Homo sapiens GN=C3 PE=1 SV=2 - [CO3_HUMAN]	35.54	2	23	51	213	2.79113e+06	2.52903e+06	6.54344e+06	6.874e+07	4.59231e+07					7.91759	8.42	12	12	63.16	2.53	3	4	7.96199	7.04	8	8	24.56	1.92	3	6	4.53138	4.93	7	8	455.601	13.23	17	29	62.127	17.44	24	42	554.96	12.15	16	30	63.4499	14.49
A8MWG7	Uncharacterized protein OS=Homo sapiens GN=YSK4 PE=4 SV=1 - [A8MWG7_HUMAN]	35.5	7	2	33	64	8363172	4.51349e+06	4.15655e+06	1.09009e+08	6.53285e+07					2.02864	14.15	12	15					3.86064	11.98	8	10					1.60755	7.03	6	8					3.36673	15.36	11	14					1.64249	7.12
P04040	Catalase OS=Homo sapiens GN=CAT PE=1 SV=3 - [CATA_HUMAN]	35.48	1	9	15	51	479121	263103	788770	1.15815e+07	4.75239e+06	43.24	5.88	2	2	5.53255	7.97	3	3	37.39	3.04	1	1	7.25041	11.2	4	5	23.76	5.5	2	2	7.50053	8.73	3	4					0	4.36	2	2					0	3.98
O95171-2	Isoform 2 of Sciellin OS=Homo sapiens GN=SCEL - [SCEL_HUMAN]	35.48	3	1	24	35	280089	813348	314917	3.12055e+07	6.01747e+07					0	5.39	3	4					0	5.84	4	4					0	1.95	1	1					0	4.64	3	3					1.60769	16.17
P42126-2	Isoform 2 of Enoyl-CoA delta isomerase 1, mitochondrial OS=Homo sapiens GN=ECI1 - [ECI1_HUMAN]	35.44	2	4	10	59	5.59021e+06	2.67693e+06	1.56853e+06	2.30909e+07	3.00434e+07					4.30277	11.93	3	4	23.47	7.72	2	3	5.24843	7.72	2	4	45.99	12.28	3	3	7.5256	12.28	3	4	58.6	10.88	3	4	8.79034	18.95	5	8	57.2237	5.26	1	2	5.49059	5.26
Q9UH99	SUN domain-containing protein 2 OS=Homo sapiens GN=SUN2 PE=1 SV=3 - [SUN2_HUMAN]	35.43	3	9	19	79	613437	984449	505266	4.92541e+06	1.71694e+07	96.0129	12.13	5	8	26.5124	18.41	7	11	151.41	9.62	4	6	17.6119	15.76	7	10	105.88	7.53	4	6	12.0855	10.04	5	6	62.79	10.6	5	6	13.2856	12.27	6	7	109.77	10.46	5	7	17.3527	15.76
Q9C035-5	Isoform Epsilon of Tripartite motif-containing protein 5 OS=Homo sapiens GN=TRIM5 - [TRIM5_HUMAN]	35.42	8	1	8	42	2.1145e+07	1.37931e+07	1.22913e+07	1.38648e+08	1.54985e+07					1.96758	13.65	3	5					5.61482	19.93	4	7					1.61006	13.65	3	6					6.00996	19.93	4	7					5.4912	16.61
E5RHQ8	Uncharacterized protein OS=Homo sapiens GN=GKN2 PE=4 SV=1 - [E5RHQ8_HUMAN]	35.4	2	5	5	43	1.18821e+06	1820499	1.394e+06	2.44074e+06	4.50075e+06	34.8534	6.21	1	2	1.61595	6.21	1	2	46.2589	6.21	1	2	4.16605	9.94	2	3	41.0734	6.21	1	2	4.15412	9.94	2	3	53.53	8.07	1	1	3.46348	8.07	1	1	45.41	8.07	1	1	3.99179	8.07
P09874	Poly [ADP-ribose] polymerase 1 OS=Homo sapiens GN=PARP1 PE=1 SV=4 - [PARP1_HUMAN]	35.4	2	15	38	130	1.68903e+06	1.65046e+06	1.1081e+06	2.64415e+07	3.93605e+07	150.75	7.69	6	10	26.3444	13.31	10	14	219.41	13.91	10	16	32.5112	16.67	12	17	155.376	7.99	6	9	23.6164	14.4	12	18					0	6.8	5	5					0	4.54
A0MZ66-5	Isoform 5 of Shootin-1 OS=Homo sapiens GN=KIAA1598 - [SHOT1_HUMAN]	35.38	7	1	19	47	1.99292e+06	1.86114e+07	2.72104e+06	5.75779e+07	1.93161e+07					0	7.18	2	6					1.6963	11.03	6	8					0	12.96	5	7					2.16862	19.44	7	9					0	4.03
O14949	Cytochrome b-c1 complex subunit 8 OS=Homo sapiens GN=UQCRQ PE=1 SV=4 - [QCR8_HUMAN]	35.37	1	2	3	11	541982	584500	896334	0	2.74904e+07					0	15.85	1	1					0	8.54	1	1					0	10.98	1	1													0	15.85
P23246	Splicing factor, proline- and glutamine-rich OS=Homo sapiens GN=SFPQ PE=1 SV=2 - [SFPQ_HUMAN]	35.36	2	10	26	101	866372	3.87625e+06	911016	8.14592e+07	1.25767e+08	103.197	4.81	2	3	14.427	14.43	8	11	77.54	8.06	4	6	17.0166	11.32	8	12	52.85	11.17	6	7	14.3196	11.32	7	12	36.18	3.11	1	2	5.86543	13.86	9	11	25.46	3.11	1	2	5.56463	9.19
Q13423	NAD(P) transhydrogenase, mitochondrial OS=Homo sapiens GN=NNT PE=1 SV=3 - [NNTM_HUMAN]	35.36	5	5	39	288	2.35758e+06	2.74688e+06	3.67068e+06	3.3727e+07	2.62109e+07	237.473	7.55	5	10	32.4686	11.69	9	18	273.67	10.13	7	13	31.6173	11.97	9	18	146.117	8.01	5	10	27.0498	13.44	10	18	235.031	12.52	13	22	38.7119	16.39	17	25	232.297	14.46	14	21	44.4486	17.59
F5GWS8	Uncharacterized protein OS=Homo sapiens GN=HSPA13 PE=3 SV=1 - [F5GWS8_HUMAN]	35.36	2	1	10	13	1.06958e+06	50271.2	2.06206e+06	0	1.21107e+07					4.09525	7.98	2	3					0	2.66	1	1					0	5.7	1	1					0	12.17	2	2					0	17.49
O43678	NADH dehydrogenase [ubiquinone] 1 alpha subcomplex subunit 2 OS=Homo sapiens GN=NDUFA2 PE=1 SV=3 - [NDUA2_HUMAN]	35.35	1	1	2	3	0	0	0	6.50111e+07	0																													0	14.14	1	1
E7EX87	Uncharacterized protein OS=Homo sapiens GN=FBXO17 PE=3 SV=1 - [E7EX87_HUMAN]	35.33	4	2	12	19	7.15885e+06	2.27051e+06	4.11991e+06	0	6.18209e+06					0	1.93	1	3					0	8.88	2	2					1.75092	10.42	3	3													1.98499	9.46
P09496-2	Isoform Non-brain of Clathrin light chain A OS=Homo sapiens GN=CLTA - [CLCA_HUMAN]	35.32	7	2	8	25	1.03791e+06	9.90066e+06	0	9.03846e+06	5.43442e+06					0	5.96	1	1					0	24.77	3	5					0	18.81	2	3					0	13.76	2	2					0	15.14
O95298	NADH dehydrogenase [ubiquinone] 1 subunit C2 OS=Homo sapiens GN=NDUFC2 PE=1 SV=1 - [NDUC2_HUMAN]	35.29	6	2	5	25	0	406318	0	6286023	8.00224e+06					0	5.88	1	1					3.52499	25.21	3	5					0	5.88	1	1	34.03	18.49	2	2	4.57594	18.49	2	3	21.3	10.08	1	2	3.89568	10.08
O00422	Histone deacetylase complex subunit SAP18 OS=Homo sapiens GN=SAP18 PE=1 SV=1 - [SAP18_HUMAN]	35.29	1	1	6	7	0	0	228941	0	0																					0	10.46	2	2
Q9BRP8	Partner of Y14 and mago OS=Homo sapiens GN=WIBG PE=1 SV=1 - [WIBG_HUMAN]	35.29	2	1	5	11	0	0	0	0	2.93462e+07																					2.07024	15.69	2	2													1.72889	21.57
Q6PCB0	von Willebrand factor A domain-containing protein 1 OS=Homo sapiens GN=VWA1 PE=2 SV=1 - [VWA1_HUMAN]	35.28	2	7	11	51	1.07831e+06	587110	552286	8.22999e+06	2.86422e+07	51.81	11.69	3	3	8.47515	11.69	3	4	120.78	14.83	4	6	19.6846	17.98	5	10	63.8963	10.79	3	3	9.93034	13.48	4	4	80.61	9.89	3	4	16.5751	19.1	5	6	117.48	9.66	3	5	19.9337	9.89
A6NDY6	Phosphorylase OS=Homo sapiens GN=PYGM PE=2 SV=1 - [A6NDY6_HUMAN]	35.28	5	1	22	35	1.78531e+06	7.35645e+06	1727968	7.86666e+06	4.17681e+07					1.87803	3.45	2	2					5.45161	4.64	4	6					0	9.81	4	4					3.31506	11.54	6	8					2.0522	12.33
P35580	Myosin-10 OS=Homo sapiens GN=MYH10 PE=1 SV=3 - [MYH10_HUMAN]	35.27	5	7	79	570	4.21088e+07	3.84859e+07	3.09682e+07	1.90345e+08	1.67548e+08	625.18	11.99	25	48	89.4752	16.24	30	55	662.428	11.08	24	50	92.3899	15.49	31	56	651.728	9.67	20	51	94.2401	13.11	24	55	574.112	8.7	19	39	86.3772	11.89	23	48	565.595	9.01	19	42	79.3933	12.7
P11182	Lipoamide acyltransferase component of branched-chain alpha-keto acid dehydrogenase complex, mitochondrial OS=Homo sapiens GN=DBT PE=1 SV=3 - [ODB2_HUMAN]	35.27	3	6	14	49	0	9.31413e+06	1.31521e+06	0	5.55697e+07					2.44678	2.9	1	1					2.0763	9.54	3	3					1.61631	1.87	1	1					0	2.28	1	1					0	6.22
P53618	Coatomer subunit beta OS=Homo sapiens GN=COPB1 PE=1 SV=3 - [COPB_HUMAN]	35.26	4	12	33	129	1.025e+06	3.40483e+06	878997	1.72478e+07	3.63732e+07					9.2557	4.51	4	6	23.09	1.47	1	1	12.3852	15.74	10	14	44.3	4.51	3	4	13.3078	7.87	7	11	105.94	3.04	2	3	16.7405	9.02	8	11	90.92	5.88	4	5	22.8928	18.36
E9PEA9	Uncharacterized protein OS=Homo sapiens GN=PCSK5 PE=3 SV=2 - [E9PEA9_HUMAN]	35.22	5	2	17	54	1.06838e+06	7.21717e+06	937730	7.75605e+07	7.51631e+07					0	8.7	3	4	0	1.01	1	3	0	11.74	4	6	0	1.01	1	2	0	12.17	5	8					2.15679	18.26	7	9					1.76399	12.75
Q8TA92	Similar to AFG3 ATPase family gene 3-like 2 (Yeast) (Fragment) OS=Homo sapiens PE=2 SV=1 - [Q8TA92_HUMAN]	35.22	2	5	23	62	1.03153e+06	695470	813060	1.68171e+07	3.42615e+07					0	1.35	1	1					1.87303	2.71	2	3					0	7.64	5	6	0	1.72	1	2	1.62381	12.19	8	9	32.03	4.19	3	4	3.81719	16.63
Q92945	Far upstream element-binding protein 2 OS=Homo sapiens GN=KHSRP PE=1 SV=4 - [FUBP2_HUMAN]	35.16	5	4	18	48	1.39768e+07	0	860061	4.3444e+07	3.80636e+07					3.34574	8.16	3	6					1.77803	2.11	1	1					1.91912	14.91	5	5	44.06	4.08	3	3	9.25481	7.74	5	8	0	1.27	1	2	7.23101	11.11
P23142	Fibulin-1 OS=Homo sapiens GN=FBLN1 PE=1 SV=4 - [FBLN1_HUMAN]	35.14	7	2	15	114	3.26768e+06	1.54279e+06	1.01317e+06	3.12002e+07	2.83458e+07	170.15	9.39	4	6	18.6676	18.92	8	12	236.95	6.12	3	6	22.9062	13.37	5	9	292.904	6.12	3	8	29.8369	10.38	5	10	343.755	10.81	5	11	29.5338	10.81	5	10	366.57	10.81	5	9	28.8766	19.2
P08263	Glutathione S-transferase A1 OS=Homo sapiens GN=GSTA1 PE=1 SV=3 - [GSTA1_HUMAN]	35.14	8	7	9	57	0	0	0	2.22595e+07	1.37813e+07																					0	17.57	3	4	100.7	17.12	3	4	10.2266	20.72	4	5	100.963	17.12	3	4	8.10299	17.12
Q53GG5-2	Isoform 2 of PDZ and LIM domain protein 3 OS=Homo sapiens GN=PDLIM3 - [PDLI3_HUMAN]	35.13	4	1	7	31	9.32419e+06	1.24005e+07	6.796e+06	5.63206e+06	2.26808e+07					1.65347	16.46	2	3					0	16.46	2	5					1.7224	16.46	2	5	127.906	4.75	1	2	7.19317	10.13	2	3	87.0515	9.81	2	3	7.09357	23.73
Q8IY33-5	Isoform 5 of MICAL-like protein 2 OS=Homo sapiens GN=MICALL2 - [MILK2_HUMAN]	35.12	1	1	14	27	9045611	881934	1.02987e+06	7.92243e+06	3.37086e+07					0	15.32	4	4					0	4.91	2	2					1.81931	8.09	3	3					0	3.9	2	2					0	14.74
E7EQX5	Uncharacterized protein OS=Homo sapiens GN=HLA-B PE=3 SV=1 - [E7EQX5_HUMAN]	35.1	13	2	15	142	6.19594e+06	5.92162e+06	3.84546e+06	4.78037e+07	4.86064e+07	118.828	18.71	8	15	19.0015	19.86	8	14	174.046	20.55	8	12	22.6728	22.4	8	11	101.077	16.63	7	13	17.9787	17.32	7	13	200.45	12.24	4	8	19.6856	13.86	4	7	219.013	12.24	4	8	21.565	10.85
A6ND99	Uncharacterized protein OS=Homo sapiens GN=HS2ST1 PE=4 SV=4 - [A6ND99_HUMAN]	35.09	4	1	8	9	204598	0	0	332595	0					0	5.28	2	2					2.15472	10.56	2	2					0	6.21	1	1					0	2.48	1	1					0	4.35
E9PCX7	Uncharacterized protein OS=Homo sapiens GN=NNT PE=4 SV=1 - [E9PCX7_HUMAN]	35.08	4	1	35	239	2.10912e+06	2.32861e+06	3.67068e+06	3.3727e+07	2.62109e+07	161.429	6.91	4	8	26.6931	9.84	7	15	162.987	8.06	5	9	23.6659	10.16	7	14	86.24	5.65	3	7	21.7239	10.99	7	14	220.208	11.1	11	19	34.8024	15.5	15	22	229.16	13.3	12	19	36.1642	16.86
O95447	Lebercilin-like protein OS=Homo sapiens GN=LCA5L PE=2 SV=1 - [LCA5L_HUMAN]	35.07	1	1	20	50	1.87293e+07	1.82777e+07	1.50623e+07	3.16411e+08	1.60086e+08					2.00818	7.31	3	6					2.3929	7.46	5	7					4.3423	11.49	7	9					4.4013	11.49	8	10					2.30509	7.01
O95235	Kinesin-like protein KIF20A OS=Homo sapiens GN=KIF20A PE=1 SV=1 - [KI20A_HUMAN]	35.06	2	1	27	54	3.00879e+06	2.14938e+06	329633	2.38156e+07	2.29475e+07					1.78042	12.02	7	7					0	13.03	8	11					0	1.91	2	3					1.67556	13.26	8	8					1.76919	11.57
B7Z7L3	Uncharacterized protein OS=Homo sapiens GN=CYB5R3 PE=2 SV=1 - [B7Z7L3_HUMAN]	35.03	5	7	10	144	2.64296e+06	2.90418e+06	2.45036e+06	5.81522e+07	6.45317e+07	166.697	7.49	2	6	18.5378	17.96	5	10	207.964	14.67	4	8	30.6274	18.56	4	13	160.629	18.26	5	9	27.8956	22.16	5	12	60.6633	13.77	5	12	17.903	13.77	5	12	80.7119	13.77	5	11	18.2958	17.07
P12525	Protein L-Myc-2 OS=Homo sapiens GN=MYCL2 PE=2 SV=1 - [MYCL2_HUMAN]	35.01	2	1	11	27	1.36329e+07	9.54606e+06	1.23975e+07	2.34286e+07	2.72789e+07	0	1.96	1	1	0	10.92	2	3					1.8408	5.04	2	3					3.32273	1.96	1	2					3.38	12.32	5	7	23.12	4.48	2	3	1.80442	13.73
Q16795	NADH dehydrogenase [ubiquinone] 1 alpha subcomplex subunit 9, mitochondrial OS=Homo sapiens GN=NDUFA9 PE=1 SV=2 - [NDUA9_HUMAN]	35.01	2	7	10	40	397547	286940	183051	1.01879e+07	1.49743e+07					1.69789	6.1	2	2	24.83	3.71	1	1	2.40555	3.71	1	1					2.19557	5.31	2	3	113.03	11.94	3	5	15.0692	11.94	3	5	97.88	15.38	4	5	14.6064	18.83
Q5T200	Zinc finger CCCH domain-containing protein 13 OS=Homo sapiens GN=ZC3H13 PE=1 SV=1 - [ZC3HD_HUMAN]	35.01	3	1	61	114	4.88089e+07	2.65603e+06	3.01856e+06	3.59498e+07	4.2897e+07					1.60799	9.83	13	17					0	7.85	14	16					1.68559	10.07	14	21					3.55397	8.03	12	15					3.29556	6.83
P16150	Leukosialin OS=Homo sapiens GN=SPN PE=1 SV=1 - [LEUK_HUMAN]	35	2	1	8	15	1.97324e+06	1.42149e+06	1.27821e+06	0	0					1.66515	3.25	1	1					0	3.25	2	2					0	14.25	3	4	28.1	2	1	1									2.51997	11
Q96A00-2	Isoform 2 of Protein phosphatase 1 regulatory subunit 14A OS=Homo sapiens GN=PPP1R14A - [PP14A_HUMAN]	35	2	1	5	8	0	0	0	4.72667e+07	9.39851e+06																													3.58674	15.83	2	4					0	19.17
P40429	60S ribosomal protein L13a OS=Homo sapiens GN=RPL13A PE=1 SV=2 - [RL13A_HUMAN]	34.98	2	3	10	21	3.31386e+06	2.47653e+06	64682.7	4.45448e+06	3.70592e+06	0	3.45	1	2	0	5.91	1	1	25.38	3.45	1	2	0	7.88	2	2					0	11.82	2	2					6.71369	11.33	3	5					0	11.33
Q13642	Four and a half LIM domains protein 1 OS=Homo sapiens GN=FHL1 PE=1 SV=4 - [FHL1_HUMAN]	34.98	15	3	10	34	1.62272e+06	2.73385e+06	1.16937e+06	1.30782e+07	9.95568e+06	47.78	3.72	1	2	7.94748	11.15	3	4	28.06	3.72	1	2	4.54723	3.72	1	2	28.66	3.72	1	2	4.59566	7.43	2	4					0	11.46	2	2					3.8688	15.48
O15305	Phosphomannomutase 2 OS=Homo sapiens GN=PMM2 PE=1 SV=1 - [PMM2_HUMAN]	34.96	1	1	8	14	576550	0	0	3.86936e+06	32785170					0	11.79	2	2					0	10.57	2	2					0	8.13	2	2					0	9.35	1	1					0	13.82
O43674	NADH dehydrogenase [ubiquinone] 1 beta subcomplex subunit 5, mitochondrial OS=Homo sapiens GN=NDUFB5 PE=1 SV=1 - [NDUB5_HUMAN]	34.92	3	4	8	51	310794	39324.6	6.99595e+06	51792807	3.98372e+07					0	11.64	3	4					0	7.94	2	2					3.72266	11.64	3	5					5.37871	5.82	1	4	28.54	5.82	1	4	6.10652	7.94
P07942	Laminin subunit beta-1 OS=Homo sapiens GN=LAMB1 PE=1 SV=2 - [LAMB1_HUMAN]	34.88	7	24	54	324	3.34069e+06	1.54208e+06	2.11263e+06	7.10159e+07	4.33656e+07	166.13	5.04	8	13	25.9871	12.65	16	25	184.298	4.26	7	12	24.867	11.81	16	22	163.854	5.21	8	15	30.7127	8.01	12	20	454.466	13.44	22	44	83.5882	15.23	26	53	534.988	14.61	23	42	81.8896	19.32
Q92747	Actin-related protein 2/3 complex subunit 1A OS=Homo sapiens GN=ARPC1A PE=1 SV=2 - [ARC1A_HUMAN]	34.86	3	3	8	27	1.58549e+06	1.30308e+06	0	4.04173e+06	5.94885e+06					1.85232	12.7	2	3					1.76036	12.7	2	2					0	7.57	1	1					0	12.16	2	2					1.64089	17.03
Q9UBV8	Peflin OS=Homo sapiens GN=PEF1 PE=1 SV=1 - [PEF1_HUMAN]	34.86	1	2	8	17	0	534076	0	1.16783e+07	6.93085e+06					0	2.11	1	1					0	7.04	2	2					0	2.11	1	1					0	20.42	3	3					3.24003	33.45
Q8N300	Coiled-coil domain-containing protein 23 OS=Homo sapiens GN=CCDC23 PE=2 SV=1 - [CCD23_HUMAN]	34.85	1	1	2	4	0	0	0	8.12707e+06	8.12213e+06																					0	22.73	1	1	0	12.12	1	2					0	12.12	1	1
P09417	Dihydropteridine reductase OS=Homo sapiens GN=QDPR PE=1 SV=2 - [DHPR_HUMAN]	34.84	4	3	6	17	0	0	482845	8.49753e+06	1.49369e+07																					0	9.84	1	1					0	14.34	2	2					0	6.56
O43491	Band 4.1-like protein 2 OS=Homo sapiens GN=EPB41L2 PE=1 SV=1 - [E41L2_HUMAN]	34.83	29	1	35	145	6.1937e+06	4.80904e+06	7.01665e+06	6.2893e+07	6.83533e+07					0	6.77	5	7	0	1.39	2	2	3.3785	9.85	9	12					5.24357	8.36	7	12	147.06	9.35	7	17	32.7791	16.82	14	28	166.866	7.36	6	10	22.0601	18.11
P08575	Receptor-type tyrosine-protein phosphatase C OS=Homo sapiens GN=PTPRC PE=1 SV=2 - [PTPRC_HUMAN]	34.82	14	14	40	146	1.08077e+07	840666	1.72234e+06	5.366e+07	1.89593e+07	111.137	5.44	6	9	18.9619	11.2	11	17	64.51	3.3	4	6	15.7968	10.35	9	11	59.81	4.52	5	10	23.8018	11.66	12	16	56.03	5.21	6	10	23.3437	13.88	14	20	62.66	5.37	6	10	22.1277	12.27
Q13838	Spliceosome RNA helicase DDX39B OS=Homo sapiens GN=DDX39B PE=1 SV=1 - [DX39B_HUMAN]	34.81	25	8	16	53	1.41065e+06	616196	1.51779e+06	1.55686e+07	1.67258e+07	88.02	7.48	3	5	5.52076	6.07	2	3	66.72	5.61	2	3	13.9191	7.24	3	6	42.29	4.67	2	2	4.91381	7.24	2	2					3.40413	7.94	4	5					3.28028	3.97
Q16851-2	Isoform 2 of UTP--glucose-1-phosphate uridylyltransferase OS=Homo sapiens GN=UGP2 - [UGPA_HUMAN]	34.81	13	5	16	55	2.02208e+06	1.34002e+07	2.38758e+07	4.32708e+07	3.43841e+07					0	5.84	2	3	0	1.21	1	1	0	4.43	2	2	0	1.21	1	2	0	5.84	2	2	28.7	3.62	2	2	4.63685	12.47	5	5					7.37097	13.88
Q9NU02	Ankyrin repeat domain-containing protein 5 OS=Homo sapiens GN=ANKRD5 PE=2 SV=2 - [ANKR5_HUMAN]	34.79	1	1	20	36	0	2.09685e+06	0	1.06116e+07	8.62537e+06					4.84346	4.12	2	3					5.8501	6.19	4	5					0	2.06	1	1					0	8.89	5	6					1.78965	5.41
Q9UKJ3	G patch domain-containing protein 8 OS=Homo sapiens GN=GPATCH8 PE=1 SV=2 - [GPTC8_HUMAN]	34.75	4	2	41	110	3.61299e+07	1.05027e+06	2.24156e+06	6.35421e+08	5.67359e+08					3.23208	8.99	8	15					3.37129	9.65	9	14					3.72742	8.79	10	13					3.40757	10.72	9	17	0	1.53	3	4	1.72842	4.99
P33992	DNA replication licensing factor MCM5 OS=Homo sapiens GN=MCM5 PE=1 SV=5 - [MCM5_HUMAN]	34.74	2	1	22	37	880431	5.99515e+06	2.03718e+06	4.26372e+07	1.43118e+07					0	2.86	2	2	0	1.91	2	5	0	8.58	5	5					0	9.81	5	6					2.01899	11.99	7	8					0	14.58
Q86UP2	Kinectin OS=Homo sapiens GN=KTN1 PE=1 SV=1 - [KTN1_HUMAN]	34.71	3	7	53	121	7.40425e+06	9.82693e+06	8.39428e+06	6.27717e+07	4.06128e+07	25.78	0.81	1	1	10.1272	7.89	12	15					1.6162	7.96	9	11					3.8746	9.14	12	14					7.47633	8.92	11	14	67.37	2.28	3	4	12.563	9.73
Q9H246	Uncharacterized protein C1orf21 OS=Homo sapiens GN=C1orf21 PE=1 SV=1 - [CA021_HUMAN]	34.71	1	1	4	16	155893	1.78637e+06	2.0012e+06	8.98611e+07	3.0263e+07					0	9.09	1	1					0	11.57	1	1					0	11.57	1	1					0	11.57	1	2	44.72	10.74	1	1	3.3371	32.23
Q9Y255	PRELI domain-containing protein 1, mitochondrial OS=Homo sapiens GN=PRELID1 PE=2 SV=1 - [PRLD1_HUMAN]	34.7	2	1	7	11	0	1.76602e+06	0	8.47116e+06	9.52644e+06													0	5.94	1	1													1.74269	4.11	1	2					1.69034	25.11
E9PAL5	Uncharacterized protein OS=Homo sapiens GN=COL6A5 PE=4 SV=2 - [E9PAL5_HUMAN]	34.68	7	33	80	305	1.75348e+06	2.87431e+06	1.97783e+06	96263597	8.55141e+07					0	5.47	10	11					1.79742	3.63	7	10					1.6254	1.22	3	5	811.249	14.07	32	54	99.0301	20.27	45	69	783.456	15.45	33	55	116.033	18.32
F8WF09	Uncharacterized protein OS=Homo sapiens PE=4 SV=1 - [F8WF09_HUMAN]	34.68	1	1	6	12	0	0	0	6.3101e+06	0					0	6.85	1	1					0	8.06	1	1					0	13.31	3	4					0	14.52	2	2					1.64863	8.06
Q969H8	UPF0556 protein C19orf10 OS=Homo sapiens GN=C19orf10 PE=1 SV=1 - [CS010_HUMAN]	34.68	1	2	5	9	0	375406	0	0	0													0	30.06	2	2
Q9UL25	Ras-related protein Rab-21 OS=Homo sapiens GN=RAB21 PE=1 SV=3 - [RAB21_HUMAN]	34.67	1	2	6	29	0	895220	1.50805e+06	1.11331e+07	1.29847e+07													1.83763	14.67	2	2					0	7.11	1	1	38.05	6.67	1	2	3.54164	13.78	2	3	37.24	6.67	1	2	1.66558	6.67
P36957	Dihydrolipoyllysine-residue succinyltransferase component of 2-oxoglutarate dehydrogenase complex, mitochondrial OS=Homo sapiens GN=DLST PE=1 SV=4 - [ODO2_HUMAN]	34.66	2	8	13	132	2.01394e+06	1.44489e+06	1.8156e+06	4.84752e+07	6.04718e+07	75.7033	5.96	2	4	9.88858	7.51	3	6	146.233	11.92	5	10	18.3401	11.92	5	10	109.7	14.35	6	11	15.9028	11.92	5	9	121.72	5.96	2	7	21.4307	15.67	4	10	147.123	8.39	3	9	22.1098	12.58
P15924	Desmoplakin OS=Homo sapiens GN=DSP PE=1 SV=3 - [DESP_HUMAN]	34.66	19	6	90	156	4.80274e+06	7.0207e+06	6.18428e+06	7.87517e+07	1.31678e+08					0	5.75	15	17					0	8.6	18	22					1.60861	8.46	17	21	18.89	1.46	5	6	4.26113	6.23	13	16	0	1.25	5	7	2.1624	8.5
P39656	Dolichyl-diphosphooligosaccharide--protein glycosyltransferase 48 kDa subunit OS=Homo sapiens GN=DDOST PE=1 SV=4 - [OST48_HUMAN]	34.65	2	10	16	195	3.81146e+06	3.84071e+06	2.09443e+06	6.56567e+07	5.36901e+07	469.545	20.39	7	17	62.0739	20.39	7	18	443.335	17.98	6	16	59.244	19.3	7	17	415.041	20.39	7	16	58.3717	20.39	7	16	261.634	21.49	8	16	43.6586	27.63	11	20	221.65	21.27	9	17	27.7865	20.18
B7Z5W1	Uncharacterized protein OS=Homo sapiens GN=F11R PE=2 SV=1 - [B7Z5W1_HUMAN]	34.65	3	3	8	11	4.93317e+06	0	0	9.1729e+06	9.80533e+06					0	1.98	1	2																					1.64301	14.52	3	3					0	3.63
O95563	Brain protein 44 OS=Homo sapiens GN=BRP44 PE=1 SV=1 - [BR44_HUMAN]	34.65	2	5	5	42	0	0	0	2.89773e+07	1.43581e+07																									57.1407	28.35	4	9	18.4595	28.35	4	8	48.3743	28.35	4	7	9.76232	28.35
Q86YZ3	Hornerin OS=Homo sapiens GN=HRNR PE=1 SV=2 - [HORN_HUMAN]	34.63	1	3	35	69	4.39301e+06	71588.8	2.71396e+06	56505986	4.05177e+07	82.2	3.61	2	3	8.6761	11.72	11	15					0	6.32	6	6					0	3.47	3	4	66.4598	2.81	1	2	3.72274	14.39	9	11	62.98	2.81	1	2	5.81602	15.58
F5GXU2	Uncharacterized protein OS=Homo sapiens GN=PRMT3 PE=4 SV=1 - [F5GXU2_HUMAN]	34.62	2	1	11	17	0	1.65361e+07	1.26257e+07	2.07324e+07	1.43105e+07													0	5.8	2	2					0	10.25	3	3					2.22158	7.16	2	3					0	7.54
A6XMW0	Proteoglycan 2 preproprotein OS=Homo sapiens GN=PRG2 PE=2 SV=1 - [A6XMW0_HUMAN]	34.6	2	3	9	93	1.75845e+06	1.91902e+06	1.69028e+06	1.7355e+08	1.37986e+08	56.28	10.43	2	6	7.69671	10.43	2	6	51.76	10.43	2	6	7.35401	32.7	4	8	62.58	10.43	2	6	7.2387	10.43	2	6	116.92	10.9	3	10	14.8731	18.01	5	12	136.616	10.9	3	10	22.7676	16.59
P06727	Apolipoprotein A-IV OS=Homo sapiens GN=APOA4 PE=1 SV=3 - [APOA4_HUMAN]	34.6	17	1	16	40	1.13863e+07	1.91349e+07	6.86859e+06	1.41059e+07	10962403					1.9943	11.36	4	4	0	1.52	1	1	1.91526	10.61	3	3	0	1.52	1	3	1.76658	12.63	4	4					3.99814	13.89	7	10					3.28396	16.16
P53367-2	Isoform A of Arfaptin-1 OS=Homo sapiens GN=ARFIP1 - [ARFP1_HUMAN]	34.6	3	3	14	42	1.48733e+06	1.55323e+06	649983	0	2.06499e+07					0	16.13	5	6	30.38	4.4	1	1	3.88959	12.02	4	5	0	4.4	1	1	1.81822	8.21	3	4									0	2.05	1	1	0	3.81
Q96PV4	Paraneoplastic antigen-like protein 5 OS=Homo sapiens GN=PNMA5 PE=2 SV=2 - [PNMA5_HUMAN]	34.6	1	1	12	22	3610217	857597	1.31087e+06	4.8144e+07	55246054					0	8.04	2	2	0	1.56	1	1	0	20.09	5	5					0	6.7	2	2					0	5.8	2	2					0	3.35
O94903	Proline synthase co-transcribed bacterial homolog protein OS=Homo sapiens GN=PROSC PE=1 SV=1 - [PROSC_HUMAN]	34.55	2	1	6	20	0	2.38961e+07	0	0	0					1.60346	3.27	1	2					1.63828	13.45	3	3					0	11.27	2	3					0	14.18	2	5					0	8
P35813	Protein phosphatase 1A OS=Homo sapiens GN=PPM1A PE=1 SV=1 - [PPM1A_HUMAN]	34.55	3	1	11	21	0	0	193957	8.57426e+07	1.5889e+07																					1.62906	12.04	3	3					0	8.38	3	3					0	6.54
Q6UXU4-4	Isoform 3 of Germ cell-specific gene 1-like protein OS=Homo sapiens GN=GSG1L - [GSG1L_HUMAN]	34.54	2	1	7	9	0	0	272725	1.66408e+07	1.12073e+07													0	10.31	1	1					0	10.31	1	1					0	5.67	1	2					0	3.61
Q14108	Lysosome membrane protein 2 OS=Homo sapiens GN=SCARB2 PE=1 SV=2 - [SCRB2_HUMAN]	34.52	2	2	13	119	584081	624742	400215	2.76741e+07	2.49594e+07	35.8767	4.81	2	3	2.35334	6.49	3	4	81.6	7.32	3	5	9.61326	16.32	5	8	22.44	2.51	1	1	1.90868	7.11	2	2	109.623	8.16	5	9	18.9067	11.09	6	12	251.799	12.97	5	10	33.665	17.57
E9PKH8	Uncharacterized protein OS=Homo sapiens GN=MS4A1 PE=4 SV=1 - [E9PKH8_HUMAN]	34.51	3	2	5	10	8.00754e+06	282971	192040	3.9065e+07	3.67288e+06					0	2.82	1	1					1.92964	31.69	4	5					1.91773	5.28	1	1					0	2.82	1	2					0	5.28
Q14019	Coactosin-like protein OS=Homo sapiens GN=COTL1 PE=1 SV=3 - [COTL1_HUMAN]	34.51	1	3	7	28	793462	790874	0	0	4.35035e+06					0	5.63	1	1					0	5.63	1	1													0	5.63	1	2					1.70987	16.9
P0CG39	POTE ankyrin domain family member J OS=Homo sapiens GN=POTEJ PE=3 SV=1 - [POTEJ_HUMAN]	34.49	21	1	31	484	2.23182e+08	2.1801e+08	1.93223e+08	1079352977	1.02562e+09	573.039	8.86	6	31	92.6007	14.74	11	48	622.46	6.17	5	31	85.9056	14.74	11	45	567.459	6.65	5	34	73.1639	15.61	12	43	351.028	10.31	8	31	69.9071	16.09	13	41	456.38	8.86	8	27	62.6077	14.07
P63027	Vesicle-associated membrane protein 2 OS=Homo sapiens GN=VAMP2 PE=1 SV=3 - [VAMP2_HUMAN]	34.48	2	1	3	50	1.31751e+06	1.84025e+06	1.32858e+06	3.03808e+07	2.8831e+07	108.317	20.69	2	3	7.70004	28.45	2	3	121.38	28.45	2	3	12.0599	28.45	2	4	139.27	28.45	2	4	13.3438	28.45	2	4	284.944	28.45	2	4	15.6249	28.45	2	4	241.32	28.45	2	4	14.3928	28.45
Q9HCC0-2	Isoform 2 of Methylcrotonoyl-CoA carboxylase beta chain, mitochondrial OS=Homo sapiens GN=MCCC2 - [MCCB_HUMAN]	34.48	3	3	14	27	878243	1.48338e+06	1.5889e+06	7.39975e+06	2.58268e+07					0	5.71	2	2					1.68733	1.71	1	1					0	3.81	1	1					0	4.38	2	2					0	9.52
A5D6W7	SEC14L4 protein OS=Homo sapiens GN=SEC14L4 PE=2 SV=1 - [A5D6W7_HUMAN]	34.44	3	1	8	19	0	4.19917e+06	4.37231e+07	3.07217e+07	1.34666e+07					0	10.28	2	2					0	6.94	2	3					0	15.56	3	3					0	5.28	1	2					0	17.22
Q9H7C9	UPF0366 protein C11orf67 OS=Homo sapiens GN=C11orf67 PE=1 SV=1 - [CK067_HUMAN]	34.43	6	1	3	5	0	0	0	0	1.23593e+07																																					0	9.02
E7ENP0	Uncharacterized protein OS=Homo sapiens GN=TBXAS1 PE=4 SV=1 - [E7ENP0_HUMAN]	34.42	6	4	12	20	4.8924e+06	0	5.60821e+06	2.93074e+06	1.18011e+07					0	2.18	1	1													0	5.45	1	1	43.71	4.79	2	3	5.10328	10.02	3	4	48.57	3.7	2	2	2.85103	10.02
P16402	Histone H1.3 OS=Homo sapiens GN=HIST1H1D PE=1 SV=2 - [H13_HUMAN]	34.39	3	1	11	205	4.97758e+07	7.48892e+07	4.08046e+07	1.54947e+09	1.73572e+09	32.73	17.65	5	11	5.8304	20.81	6	11	49.48	9.05	2	9	8.36577	9.05	2	14	64.7	9.5	3	8	6.79792	12.22	3	11	224.351	19	5	20	35.9083	19	6	25	211.433	19.46	7	20	31.5257	19.46
P43304	Glycerol-3-phosphate dehydrogenase, mitochondrial OS=Homo sapiens GN=GPD2 PE=1 SV=3 - [GPDM_HUMAN]	34.39	4	8	23	69	370184	1.22542e+06	3.05597e+07	5.51206e+06	3.20751e+07					2.0357	10.04	5	5	26.99	3.3	2	3	2.92831	8.94	5	5					0	1.79	1	1	34.99	2.61	2	3	4.5613	2.34	2	3	21.89	2.61	2	2	2.14822	4.13
Q86SQ0-3	Isoform 3 of Pleckstrin homology-like domain family B member 2 OS=Homo sapiens GN=PHLDB2 - [PHLB2_HUMAN]	34.36	6	1	27	55	1.99486e+06	2.37702e+06	1.85043e+06	2.48472e+07	8.77564e+07					1.69707	8.65	5	6					0	11.48	6	8					1.69038	11.08	9	11					3.91253	10.99	9	12					3.91126	8.16
Q96NZ8	WAP, kazal, immunoglobulin, kunitz and NTR domain-containing protein 1 OS=Homo sapiens GN=WFIKKN1 PE=1 SV=1 - [WFKN1_HUMAN]	34.31	1	1	11	16	788829	2.51932e+06	911912	0	5.19602e+06					0	14.23	4	4					0	10.95	4	4					0	9.85	2	2													0	10.04
Q14554	Protein disulfide-isomerase A5 OS=Homo sapiens GN=PDIA5 PE=1 SV=1 - [PDIA5_HUMAN]	34.3	3	5	12	86	1.89965e+06	1.52405e+06	1.19136e+06	1.74336e+07	1.30747e+07	245.521	6.55	2	8	38.6009	19.27	6	13	178.514	8.86	3	8	31.9306	10.79	4	10	159.18	8.86	3	8	27.6446	8.86	3	8	39.43	1.93	1	2	6.67474	10.02	4	6	42.43	1.93	1	2	6.32408	13.1
O60313-2	Isoform 2 of Dynamin-like 120 kDa protein, mitochondrial OS=Homo sapiens GN=OPA1 - [OPA1_HUMAN]	34.3	6	3	35	82	1.73821e+06	1.56343e+06	1.33482e+06	4.72869e+07	4.55999e+07					4.03081	8.22	5	8					4.45853	7.42	6	8					6	5.32	4	6	23.48	2.51	3	5	8.01536	13.74	12	14	29.31	2.41	3	3	5.50971	6.92
Q14152	Eukaryotic translation initiation factor 3 subunit A OS=Homo sapiens GN=EIF3A PE=1 SV=1 - [EIF3A_HUMAN]	34.3	11	8	53	110	1.44217e+07	2.62051e+06	3.49072e+06	3.69372e+07	3.77512e+07					0	6.95	10	11					0	5.64	8	10					1.87277	5.93	10	11	38.62	2.89	5	8	5.56162	13.97	14	17					0	8.76
Q9NZ45	CDGSH iron-sulfur domain-containing protein 1 OS=Homo sapiens GN=CISD1 PE=1 SV=1 - [CISD1_HUMAN]	34.26	1	3	3	66	946098	757537	636181	3.21512e+07	28363518	94.93	13.89	1	2	9.3263	13.89	1	2	112.49	25.93	2	4	17.5629	25.93	2	5	108.68	25.93	2	5	17.5083	25.93	2	5	130.51	25.93	2	5	19.002	34.26	3	8	116.63	25.93	2	5	17.5973	25.93
E9PC15	Uncharacterized protein OS=Homo sapiens GN=AGK PE=4 SV=1 - [E9PC15_HUMAN]	34.26	3	3	8	16	142412	84579.2	0	0	1.28893e+07					0	2.28	1	1					0	2.28	1	1													0	4.57	2	2					3.75429	19.04
P11387	DNA topoisomerase 1 OS=Homo sapiens GN=TOP1 PE=1 SV=2 - [TOP1_HUMAN]	34.25	1	4	29	57	5.39343e+07	1.96254e+07	1.41716e+07	9.10634e+06	2.7784e+07					0	5.49	4	4					0	6.14	4	7					0	8.37	7	8					1.76196	11.37	7	7					3.53151	11.24
Q96P66	Probable G-protein coupled receptor 101 OS=Homo sapiens GN=GPR101 PE=2 SV=1 - [GP101_HUMAN]	34.25	1	1	15	27	0	2.28717e+06	0	8.56068e+06	9.96429e+06					1.80373	11.42	2	2					0	14.96	4	6					2.07971	3.74	1	1					1.83328	6.3	3	6					0	4.72
Q7L014	Probable ATP-dependent RNA helicase DDX46 OS=Homo sapiens GN=DDX46 PE=1 SV=2 - [DDX46_HUMAN]	34.24	1	2	25	35	3.5566e+06	842009	556694	1.59714e+07	6.09767e+06	0	2.13	3	4	0	5.82	4	5					0	0.97	1	1					0	2.04	2	2					0	3.88	3	3					0	4.36
Q7Z406	Myosin-14 OS=Homo sapiens GN=MYH14 PE=1 SV=2 - [MYH14_HUMAN]	34.24	8	11	67	437	2.53459e+07	2.70901e+07	2.22892e+07	2.34352e+08	1.79774e+08	397.054	5.86	12	28	74.1274	8.82	17	43	439.202	5.46	12	31	84.33	12.73	23	49	382.872	5.06	10	27	66.1589	10.03	17	41	273.298	5.56	11	23	56.1034	9.72	17	39	318.082	5.81	13	26	51.4251	12.83
P05141	ADP/ATP translocase 2 OS=Homo sapiens GN=SLC25A5 PE=1 SV=7 - [ADT2_HUMAN]	34.23	2	2	12	251	1.42195e+07	6.95136e+06	6.86268e+06	1.45507e+08	1.34335e+08	145.953	23.15	7	12	23.6843	23.15	7	12	156.519	21.48	7	16	25.312	21.48	7	17	130.136	18.46	6	14	25.688	21.48	7	16	234.744	30.87	10	24	31.8263	33.89	11	26	243.423	31.21	11	26	32.2645	31.21
Q8NHJ6-2	Isoform 2 of Leukocyte immunoglobulin-like receptor subfamily B member 4 OS=Homo sapiens GN=LILRB4 - [LIRB4_HUMAN]	34.23	11	1	11	23	6.3891e+06	1.30448e+07	9.26138e+06	271553904	2.33382e+08					0	7.83	4	5					0	4.03	1	2					0	10.74	2	3					2.65174	14.32	3	5					0	18.34
P24534	Elongation factor 1-beta OS=Homo sapiens GN=EEF1B2 PE=1 SV=3 - [EF1B_HUMAN]	34.22	4	5	7	101	2.48584e+06	1.23904e+06	622059	1.21883e+07	1.68563e+07	75.2	5.78	1	2	6.78802	5.78	1	2	108.727	16.89	3	4	9.34642	16.89	3	4	46.8533	19.11	3	5	12.5973	24.89	4	6	328.67	33.78	6	14	36.4717	31.56	5	12	297.71	25.78	4	7	23.6805	31.56
Q5T091	RER1 retention in endoplasmic reticulum 1 homolog (S. cerevisiae) OS=Homo sapiens GN=RER1 PE=2 SV=1 - [Q5T091_HUMAN]	34.22	5	2	4	25	428122	0	346830	7.71995e+06	7.93431e+06	26.47	9.63	1	1	3.16281	9.63	1	1	29.82	9.63	1	1	3.47772	17.65	2	2	21.7	9.63	1	1	3.34532	9.63	1	1	115.83	9.63	1	2	8.56856	9.63	1	2	110.853	15.51	2	3	8.71459	26.2
Q15233	Non-POU domain-containing octamer-binding protein OS=Homo sapiens GN=NONO PE=1 SV=4 - [NONO_HUMAN]	34.18	5	7	22	115	1.00609e+07	7.74487e+06	4.48904e+06	2.04444e+08	1.71179e+08	22.02	8.49	4	6	14.0914	21.66	9	13	25.4134	8.28	4	7	10.1292	12.74	5	11	42.03	1.7	1	2	5.57892	12.1	5	10	39.04	8.28	4	7	9.08893	21.87	11	15	28.96	8.49	5	6	8.92264	15.5
Q9UQE7	Structural maintenance of chromosomes protein 3 OS=Homo sapiens GN=SMC3 PE=1 SV=2 - [SMC3_HUMAN]	34.18	1	3	44	84	1.11624e+07	4.17537e+06	2.11411e+06	5.32733e+07	5.7599e+07					1.67145	7.48	7	9					3.51869	8.46	6	7					1.69663	6.9	5	5					1.97819	12.49	13	16	0	1.56	2	2	5.54717	10.76
O95573	Long-chain-fatty-acid--CoA ligase 3 OS=Homo sapiens GN=ACSL3 PE=1 SV=3 - [ACSL3_HUMAN]	34.17	2	5	21	54	792065	1.11147e+07	0	1.73042e+07	2.63093e+07	33.56	1.81	1	1	2.82101	13.75	6	6	33.62	2.22	1	2	7.00297	9.44	4	6									16.66	3.33	2	3	5.36181	5.42	2	5					0	9.17
Q15327	Ankyrin repeat domain-containing protein 1 OS=Homo sapiens GN=ANKRD1 PE=1 SV=2 - [ANKR1_HUMAN]	34.17	1	1	9	19	338673	1.73205e+06	1.11544e+06	0	3.20985e+06					0	6.27	1	1					0	10.97	2	2					0	1.88	1	1					0	3.76	1	1					0	6.9
Q6ZQY3	Glutamate decarboxylase-like protein 1 OS=Homo sapiens GN=GADL1 PE=2 SV=4 - [GADL1_HUMAN]	34.17	2	1	16	30	639818	1.17052e+06	275555	8.89502e+06	21961884					1.65594	10.75	3	4					0	1.92	1	1	0	1.34	1	1	1.80765	1.34	1	1					3.70955	14.59	4	6					0	10.75
B0QY70	Uncharacterized protein (Fragment) OS=Homo sapiens GN=MAFF PE=3 SV=1 - [B0QY70_HUMAN]	34.13	4	1	4	5	0	0	752815	5.63419e+07	8.34499e+06					0	7.14	1	1					0	15.87	1	1					0	7.14	1	1					1.61722	7.14	1	1	0	3.97	1	1
P84157-2	Isoform 2 of Matrix-remodeling-associated protein 7 OS=Homo sapiens GN=MXRA7 - [MXRA7_HUMAN]	34.12	4	5	8	69	830298	984958	874054	1.07691e+08	7.91158e+07	104.644	23.53	2	4	13.712	23.53	2	4	96.1041	23.53	3	4	12.9457	23.53	3	4	75.232	23.53	3	4	10.9769	23.53	3	4	162.511	23.53	2	4	15.628	29.41	4	8	162.516	27.65	4	7	18.1447	29.41
Q9NUP7	tRNA guanosine-2'-O-methyltransferase TRM13 homolog OS=Homo sapiens GN=CCDC76 PE=1 SV=2 - [TRM13_HUMAN]	34.1	2	1	14	17	0	0	1.43349e+06	2.10749e+07	0					1.66035	7.9	3	3					0	4.37	1	1	0	1.25	1	1	0	7.69	2	2					1.87423	8.52	3	3
Q8WWP7	GTPase IMAP family member 1 OS=Homo sapiens GN=GIMAP1 PE=1 SV=1 - [GIMA1_HUMAN]	33.99	1	3	9	19	0	594069	0	8.10794e+06	3.68856e+07													2.16769	3.27	1	1									23.79	9.48	2	2	4.8938	9.48	2	2	20.92	16.99	4	5	10.2195	24.18
P23381	Tryptophanyl-tRNA synthetase, cytoplasmic OS=Homo sapiens GN=WARS PE=1 SV=2 - [SYWC_HUMAN]	33.97	2	5	12	48	608729	0	765970	1.99183e+07	1.54741e+07					1.75045	10.4	2	3													3.4054	10.62	4	5	122.95	9.34	3	3	8.59424	12.95	5	6	95.57	3.4	1	2	7.86138	7.01
Q9NW82	WD repeat-containing protein 70 OS=Homo sapiens GN=WDR70 PE=1 SV=1 - [WDR70_HUMAN]	33.94	2	1	21	33	1.36867e+06	1.36507e+07	442932	9.11937e+06	3.29479e+07					0	5.05	2	3					0	7.95	3	3					0	5.81	2	2					1.70984	11.31	5	5					1.95406	5.66
P16144	Integrin beta-4 OS=Homo sapiens GN=ITGB4 PE=1 SV=5 - [ITB4_HUMAN]	33.92	5	10	52	132	3.09992e+07	2.90833e+07	3.96488e+06	9.42585e+07	5.15451e+07	53.16	2.03	3	3	3.51504	4.94	7	8	41.14	2.52	4	4	3.06062	8.29	10	10	0	0.82	1	2	1.74706	7.03	8	10	150.604	5.21	8	12	24.4289	13.83	18	22	205.773	4.61	7	10	24.0999	11.36
O75886-2	Isoform 2 of Signal transducing adapter molecule 2 OS=Homo sapiens GN=STAM2 - [STAM2_HUMAN]	33.92	2	1	8	24	401913	0	1.12098e+07	6.9884e+06	1.62176e+07					0	6.43	1	1					0	7.6	1	1					1.6899	8.48	2	3					0	15.79	4	5					3.43989	6.43
Q06190	Serine/threonine-protein phosphatase 2A regulatory subunit B'' subunit alpha OS=Homo sapiens GN=PPP2R3A PE=1 SV=1 - [P2R3A_HUMAN]	33.91	3	1	30	43	1.5127e+06	1.2226e+07	3.00364e+06	18188504	1.22926e+08					0	6.52	4	4					0	12.61	9	9					3.38179	6.43	5	5					0	6.87	7	8					0	4.87
Q5VX52	Spermatogenesis-associated protein 1 OS=Homo sapiens GN=SPATA1 PE=2 SV=3 - [SPAT1_HUMAN]	33.87	1	1	17	44	1.88738e+06	1.89245e+06	1.97443e+06	7.74259e+06	1.38945e+07	0	1.83	1	1	0	5.26	3	4	0	1.83	1	2	0	9.84	5	6	0	1.83	1	2	0	5.26	3	5					0	9.38	3	4					2.1429	13.5
P35240-2	Isoform 2 of Merlin OS=Homo sapiens GN=NF2 - [MERL_HUMAN]	33.87	8	1	22	44	3.27134e+06	2.12599e+06	4.59455e+06	1.22697e+08	1.67869e+08					0	6.77	3	4					0	5.48	3	3					0	2.58	2	2					0	18.71	7	8	16.22	2.1	1	2	4.63794	8.06
O60664	Perilipin-3 OS=Homo sapiens GN=PLIN3 PE=1 SV=3 - [PLIN3_HUMAN]	33.87	3	4	12	20	0	0	0	3.03708e+07	9.31237e+06																													2.09914	7.6	3	4					0	17.97
Q15424	Scaffold attachment factor B1 OS=Homo sapiens GN=SAFB PE=1 SV=4 - [SAFB1_HUMAN]	33.77	2	1	32	73	7.93059e+06	7.8329e+06	4.82042e+06	7.49248e+07	8.98038e+07	21.34	2.3	1	1	0	7.54	5	8					0	5.68	4	8					0	3.93	3	4					2.31427	10.93	8	10	0	4.7	3	4	1.62058	6.67
Q8TE04-3	Isoform 3 of Pantothenate kinase 1 OS=Homo sapiens GN=PANK1 - [PANK1_HUMAN]	33.76	5	2	14	41	4.47044e+07	6.14621e+07	0	0	6.8412e+08					0	22.93	6	8					0	12.74	3	5					0	7.01	2	3					0	7.32	2	2					1.63218	13.69
P24311	Cytochrome c oxidase subunit 7B, mitochondrial OS=Homo sapiens GN=COX7B PE=1 SV=2 - [COX7B_HUMAN]	33.75	1	1	4	20	0	0	1.40517e+06	9.73634e+06	4.464e+06																					0	18.75	2	3					0	33.75	3	4					0	16.25
E7EM68	Uncharacterized protein OS=Homo sapiens GN=SCARB2 PE=4 SV=1 - [E7EM68_HUMAN]	33.73	2	1	9	92	807830	624742	400215	1.98617e+07	2.34645e+07	22.91	3.88	1	2	0	6.27	2	3					4.57649	20.3	4	6	22.44	3.58	1	1	1.90868	3.58	1	1	72.37	6.57	3	6	13.269	6.57	3	8	198.843	15.52	4	8	28.7257	17.91
O75334	Liprin-alpha-2 OS=Homo sapiens GN=PPFIA2 PE=1 SV=1 - [LIPA2_HUMAN]	33.73	7	1	41	68	8.29251e+06	8.51096e+06	6.22443e+06	1.34508e+07	3.1731e+07					3.63627	7.4	6	7					3.29561	5.33	4	5					0	6.28	5	5					1.61091	10.26	9	10	0	1.43	2	3	1.85414	7.64
O75822	Eukaryotic translation initiation factor 3 subunit J OS=Homo sapiens GN=EIF3J PE=1 SV=2 - [EIF3J_HUMAN]	33.72	3	2	9	23	1.0126e+06	1.83425e+06	1.05809e+06	1.0217e+07	1.17702e+07					0	12.02	3	5					0	7.36	2	3					1.72782	12.79	3	3					1.79878	17.05	4	4					0	4.26
O43181	NADH dehydrogenase [ubiquinone] iron-sulfur protein 4, mitochondrial OS=Homo sapiens GN=NDUFS4 PE=1 SV=1 - [NDUS4_HUMAN]	33.71	1	2	9	39	5.29743e+06	5.47736e+06	3.9198e+06	1.53867e+07	0					0	5.71	1	3					3.39674	14.86	2	4	30.8	6.29	1	1	2.35024	21.71	4	5					2.35793	22.86	3	3					0	6.29
P30679	Guanine nucleotide-binding protein subunit alpha-15 OS=Homo sapiens GN=GNA15 PE=2 SV=2 - [GNA15_HUMAN]	33.69	1	1	11	16	0	0	1.01104e+06	27072743	595395472					0	5.08	2	2					0	4.01	1	1					0	5.61	1	2					0	8.02	2	2					0	4.55
P54709	Sodium/potassium-transporting ATPase subunit beta-3 OS=Homo sapiens GN=ATP1B3 PE=1 SV=1 - [AT1B3_HUMAN]	33.69	5	5	9	16	253652	948541	442072	9891669	1.57439e+07					0	2.87	1	1					0	6.09	2	2					0	2.87	1	1					0	5.38	1	1	77.05	8.96	2	3	11.5786	24.37
Q2VIR3	Eukaryotic translation initiation factor 2 subunit 3-like protein OS=Homo sapiens GN=EIF2S3L PE=1 SV=2 - [IF2GL_HUMAN]	33.69	2	1	12	18	0	0	3.57173e+06	4.39867e+07	5.17652e+07													0	4.45	2	2					0	4.66	2	2					0	10.81	3	3					1.6262	11.65
Q8WVX3-2	Isoform 2 of Uncharacterized protein C4orf3 OS=Homo sapiens GN=C4orf3 - [CD003_HUMAN]	33.67	1	1	7	18	4.73117e+06	4.54822e+06	4.6799e+06	8.66987e+07	103491580					0	12.56	2	2					0	5.03	1	1					0	24.62	4	4					0	14.07	3	3					0	5.03
Q96M91	Coiled-coil domain-containing protein 11 OS=Homo sapiens GN=CCDC11 PE=2 SV=2 - [CCD11_HUMAN]	33.66	1	1	21	49	1.24087e+06	1.08601e+07	3.32049e+06	8.09701e+06	4.11727e+07					0	10.31	5	7					0	11.09	6	8					0	9.92	6	9					0	6.03	3	3					3.62342	9.73
B2RXF5	Zinc finger and BTB domain-containing protein 42 OS=Homo sapiens GN=ZBTB42 PE=2 SV=2 - [ZBT42_HUMAN]	33.65	1	1	10	20	49626.9	834455	0	2.00051e+07	1.75037e+07	0	1.42	1	2	1.66443	1.42	1	1					0	9.24	3	4					0	5.69	3	3					0	11.37	3	4					0	11.37
P01833	Polymeric immunoglobulin receptor OS=Homo sapiens GN=PIGR PE=1 SV=4 - [PIGR_HUMAN]	33.64	1	8	19	87	1.92652e+06	859867	682311	8.56185e+06	9.98672e+06	43.35	2.62	2	3	7.79375	15.58	8	11	116	4.97	3	7	14.795	6.54	4	8	232.831	9.55	5	8	24.4136	11.13	6	11	104.388	4.58	2	3	9.18927	14.01	5	6	95.06	5.63	3	3	9.38604	17.54
Q70EK8	Inactive ubiquitin carboxyl-terminal hydrolase 53 OS=Homo sapiens GN=USP53 PE=2 SV=2 - [UBP53_HUMAN]	33.64	1	1	27	57	3.90557e+06	959886	1.42676e+06	5.9921e+07	6.45404e+07					1.64365	6.71	6	6					3.47737	3.91	3	4	33	0.56	1	1	1.60817	5.31	5	5					1.86082	7.83	7	12					3.47029	9.23
Q14802-2	Isoform 2 of FXYD domain-containing ion transport regulator 3 OS=Homo sapiens GN=FXYD3 - [FXYD3_HUMAN]	33.63	3	1	2	26	1.08597e+06	0	0	0	7.61769e+06					2.07818	33.63	2	3					2.40467	16.81	1	2					0	16.81	1	1					0	16.81	1	2	31.3	16.81	1	3	2.6278	16.81
Q30118	MHC cell surface glycoprotein OS=Homo sapiens GN=HLA-DRA PE=2 SV=1 - [Q30118_HUMAN]	33.62	16	6	9	105	1.91458e+06	2.08546e+06	1.64265e+06	5.06167e+07	5.1159e+07	191.85	15.28	3	8	22.2249	17.03	3	8	184.733	17.9	4	8	21.9108	17.03	3	7	185.85	15.28	3	7	21.5708	19.65	4	8	115.683	23.58	4	7	19.1109	31	6	10	153.789	28.82	6	14	28.8646	31
P05156	Complement factor I OS=Homo sapiens GN=CFI PE=1 SV=2 - [CFAI_HUMAN]	33.62	4	2	13	31	5.53608e+06	9.57608e+06	1.07255e+06	4.25105e+06	7.63247e+06					0	15.78	5	7					0	10.12	3	4					0	9.26	3	4	23.8	3.26	2	3	3.79874	10.46	3	5					2.00612	8.92
Q92841-2	Isoform 2 of Probable ATP-dependent RNA helicase DDX17 OS=Homo sapiens GN=DDX17 - [DDX17_HUMAN]	33.59	6	7	23	103	2.233e+06	3.2915e+06	2.64334e+06	6.04842e+07	5.74198e+07	89.82	3.53	2	3	4.2518	10.89	6	10	69.12	1.84	1	2	5.95431	16.56	9	12	72.52	3.53	2	4	11.0505	19.48	9	13	67.21	3.37	2	4	7.04871	6.29	3	9	65.11	4.6	3	5	7.97648	6.75
Q13510-2	Isoform 2 of Acid ceramidase OS=Homo sapiens GN=ASAH1 - [ASAH1_HUMAN]	33.58	5	4	13	29	478464	1.20855e+06	1.47149e+06	1.29043e+07	4.28533e+07	28.59	5.6	1	1	1.68227	11.68	3	4					3.37414	11.19	4	4					3.26003	8.52	4	5	74.91	4.14	1	2	7.87246	7.06	2	3	53.77	4.14	1	1	3.86317	10.46
O14763-2	Isoform Short of Tumor necrosis factor receptor superfamily member 10B OS=Homo sapiens GN=TNFRSF10B - [TR10B_HUMAN]	33.58	3	1	10	34	865244	1.73259e+06	925752	2.18065e+07	2.11473e+07					6.4841	23.11	5	7					5.88072	10.22	3	5					4.2006	9.49	4	5					7.26939	3.16	1	3					9.04523	8.27
Q7Z4V5-2	Isoform 2 of Hepatoma-derived growth factor-related protein 2 OS=Homo sapiens GN=HDGFRP2 - [HDGR2_HUMAN]	33.58	4	1	24	45	2.77592e+06	2.63923e+06	3.22924e+06	3.70407e+07	3.40607e+07					0	17.16	7	9					1.6629	7.46	3	4					0	7.01	5	5					1.67854	8.81	5	7					0	8.96
O60716-13	Isoform 2A of Catenin delta-1 OS=Homo sapiens GN=CTNND1 - [CTND1_HUMAN]	33.56	36	7	30	145	1.289e+07	1.78448e+07	6.41351e+06	5.26305e+07	4.60965e+07	97.62	5.8	4	6	12.2231	11.38	8	10	99.23	4.1	4	7	9.9164	7.05	5	9	72.6633	3.19	3	6	7.55149	6.71	4	6	149.26	9.22	9	17	17.5412	15.13	10	19	212.427	8.65	8	16	15.7719	11.15
Q16790	Carbonic anhydrase 9 OS=Homo sapiens GN=CA9 PE=1 SV=2 - [CAH9_HUMAN]	33.55	2	11	13	120	324296	4.48695e+07	315792	3.23644e+07	1.48352e+07					1.78687	3.27	1	1					0	2.4	1	1					2.02739	3.27	1	1	40.63	17.86	5	8	18.7529	21.57	7	14	117.734	19.39	6	10	23.2134	20.7
P08574	Cytochrome c1, heme protein, mitochondrial OS=Homo sapiens GN=CYC1 PE=1 SV=3 - [CY1_HUMAN]	33.54	1	3	7	33	3.65873e+06	0	0	1.22033e+07	3.32514e+07	61.64	7.38	1	2	4.74803	12.31	2	3	76.43	7.38	1	2	7.61179	7.38	1	2					0	2.77	1	1	78.93	3.69	1	2	4.72841	6.77	2	3	72.4833	6.77	2	4	7.15882	19.08
Q9H9B4	Sideroflexin-1 OS=Homo sapiens GN=SFXN1 PE=1 SV=4 - [SFXN1_HUMAN]	33.54	4	4	8	75	487074	1.26384e+06	1.37614e+06	7.41659e+06	1.05102e+07	67.3233	8.7	2	3	7.28214	14.91	3	5	135.32	11.8	3	5	12.2201	24.22	5	8	90.9	4.04	1	3	8.34701	10.25	2	4	89.02	11.8	3	5	10.5452	19.88	4	8	108.09	11.8	3	5	11.6486	18.01
Q9NS91	E3 ubiquitin-protein ligase RAD18 OS=Homo sapiens GN=RAD18 PE=1 SV=2 - [RAD18_HUMAN]	33.54	3	1	15	31	2.70751e+06	1.01086e+06	228885	0	3.09426e+06					0	7.47	2	2					0	11.52	3	3					0	10.51	4	4					1.7693	3.84	2	3					1.69809	8.08
Q96JX3	Protein SERAC1 OS=Homo sapiens GN=SERAC1 PE=2 SV=1 - [SRAC1_HUMAN]	33.49	2	1	12	15	484007	1.16276e+06	0	31733610	3.39353e+06					0	7.95	3	3					0	6.57	2	2					0	3.52	1	1					0	10.4	3	3					0	6.57
P54136	Arginyl-tRNA synthetase, cytoplasmic OS=Homo sapiens GN=RARS PE=1 SV=2 - [SYRC_HUMAN]	33.48	5	5	20	29	0	583290	2.85677e+06	1.6453e+07	4.46405e+06					0	2.58	1	2					4.25776	12.27	4	4					4.72457	12.73	5	5					3.57784	7.88	5	6					2.46935	4.39
Q8TDL5	Long palate, lung and nasal epithelium carcinoma-associated protein 1 OS=Homo sapiens GN=LPLUNC1 PE=2 SV=1 - [LPLC1_HUMAN]	33.47	5	9	13	67	3.0577e+06	2.44271e+06	2.21104e+06	5.24258e+07	2.3221e+07	100.55	14.46	7	9	17.317	14.88	6	7	75.0405	11.36	6	12	13.2527	11.36	6	8	97.5072	14.26	6	9	18.3604	13.02	5	8					1.76567	6.2	2	2					0	6.61
Q8IZ40	REST corepressor 2 OS=Homo sapiens GN=RCOR2 PE=2 SV=2 - [RCOR2_HUMAN]	33.46	1	1	14	48	5.70402e+06	9.59669e+06	4.42568e+06	7.38885e+07	6.41041e+07					2.00228	16.06	4	8					0	2.87	1	3					0	8.8	3	7					1.6919	10.33	4	9					0	8.22
Q16760	Diacylglycerol kinase delta OS=Homo sapiens GN=DGKD PE=1 SV=4 - [DGKD_HUMAN]	33.44	3	2	27	38	396824	3.66436e+06	487265	1.93317e+07	3.62414e+07					0	7.91	7	8					2.03029	10.38	6	6					1.62914	6.92	6	6					0	7.66	7	8					0	3.05
O43294	Transforming growth factor beta-1-induced transcript 1 protein OS=Homo sapiens GN=TGFB1I1 PE=1 SV=2 - [TGFI1_HUMAN]	33.41	2	3	8	18	473336	0	721622	0	8.05613e+06	28	2.6	1	1	1.81033	2.6	1	1					0	11.5	2	2	26.2767	13.02	3	3	6.25486	13.02	3	3					0	5.64	1	1					0	8.89
B1AHD1	NHP2 non-histone chromosome protein 2-like 1 (S. cerevisiae) OS=Homo sapiens GN=NHP2L1 PE=4 SV=1 - [B1AHD1_HUMAN]	33.33	2	2	4	24	683119	485393	0	3.64108e+07	3.36469e+07	47.26	9.09	1	2	4.37312	27.27	3	4	38.71	9.09	1	2	4.08279	17.42	2	3	21.6	9.09	1	1	3.60385	15.15	2	2					0	15.15	2	3					1.96088	15.15
O14494-2	Isoform 2 of Lipid phosphate phosphohydrolase 1 OS=Homo sapiens GN=PPAP2A - [LPP1_HUMAN]	33.33	2	1	5	14	0	0	2.95087e+06	6.52135e+06	2.34159e+06					2.00589	13.33	2	2													1.85485	11.23	2	4	40.91	8.77	1	2	6.04205	8.77	1	2	41.78	8.77	1	2	7.52821	8.77
B2RUY3	NADH dehydrogenase (Ubiquinone) 1 beta subcomplex, 4, 15kDa OS=Homo sapiens GN=NDUFB4 PE=4 SV=1 - [B2RUY3_HUMAN]	33.33	4	2	4	12	0	598695	0	8.63972e+06	0									0	8.33	1	1	2.2402	8.33	1	1									30.62	8.33	1	2	3.91845	8.33	1	2
Q8WUN7	Ubiquitin domain-containing protein 2 OS=Homo sapiens GN=UBTD2 PE=1 SV=2 - [UBTD2_HUMAN]	33.33	2	1	7	13	0	0	6.53943e+06	3.97142e+07	7.49053e+06													0	14.53	1	1					0	14.53	3	3					1.61604	9.4	2	2					1.7616	6.41
Q8IZM0	Putative CNGA1-overlapping antisense gene protein OS=Homo sapiens PE=5 SV=1 - [CNG1O_HUMAN]	33.33	1	1	2	5	0	0	890936	0	0																					0	11.11	1	1
P30414	NK-tumor recognition protein OS=Homo sapiens GN=NKTR PE=1 SV=2 - [NKTR_HUMAN]	33.31	1	1	47	84	1.00116e+07	5.04664e+06	9.52878e+06	3.94673e+07	5.43116e+07					2.26571	9.1	12	15					0	8.62	10	12					0	9.92	10	13					0	5.75	8	10					0	8.07
Q92598-2	Isoform Beta of Heat shock protein 105 kDa OS=Homo sapiens GN=HSPH1 - [HS105_HUMAN]	33.29	6	3	22	39	717847	143685	1.30126e+06	1.73477e+07	3.52316e+07					1.83851	6.51	3	3					3.56049	3.32	2	3					0	4.3	2	2					1.64126	7.13	5	8					3.47774	11.06
F5H7M3	Uncharacterized protein OS=Homo sapiens GN=DLAT PE=3 SV=1 - [F5H7M3_HUMAN]	33.25	1	1	12	46	1.81939e+06	1.86346e+06	1.48604e+06	1.85287e+07	2.44545e+07					1.6623	1.91	1	2					3.77433	1.91	1	2					3.39128	1.91	1	2	34.93	4.07	2	4	8.28648	16.51	5	7	27.18	5.98	3	6	5.91898	8.13
P20810-6	Isoform 6 of Calpastatin OS=Homo sapiens GN=CAST - [ICAL_HUMAN]	33.25	18	2	20	36	0	810295	2.05724e+06	5.76996e+07	1.21431e+07					0	2.15	1	1					3.30284	3.03	2	2					3.65863	3.41	3	3					1.72565	10.11	6	6					5.66573	8.34
P53597	Succinyl-CoA ligase [GDP-forming] subunit alpha, mitochondrial OS=Homo sapiens GN=SUCLG1 PE=1 SV=4 - [SUCA_HUMAN]	33.24	1	5	10	59	7.66506e+06	2.05946e+06	0	4.59927e+07	2.34556e+07					0	14.16	2	2	49.91	6.94	1	1	6.97084	11.27	2	3					2.19465	8.67	1	1	83.8	10.69	3	6	7.25723	27.46	6	8	70.19	6.36	2	6	9.51971	19.08
P33176	Kinesin-1 heavy chain OS=Homo sapiens GN=KIF5B PE=1 SV=1 - [KINH_HUMAN]	33.23	4	3	33	85	5.30557e+06	4.93615e+06	4.15161e+06	1.16607e+08	1.02889e+08	0	2.49	3	5	3.45906	12.77	10	13	28.66	3.95	4	6	5.61514	10.38	7	8	0	2.49	3	5	3.35063	6.44	5	6	0	1.87	2	2	2.04193	5.92	4	4					3.86446	14.33
P23193	Transcription elongation factor A protein 1 OS=Homo sapiens GN=TCEA1 PE=1 SV=2 - [TCEA1_HUMAN]	33.22	2	1	8	27	1.04782e+06	1.01325e+06	0	0	0	56.31	3.99	1	2	5.08151	17.28	4	5	71.55	3.99	1	2	5.52189	7.64	2	3					0	10.63	2	2					0	6.64	1	1
P49454	Centromere protein F OS=Homo sapiens GN=CENPF PE=1 SV=2 - [CENPF_HUMAN]	33.21	4	3	90	193	1.47643e+07	2.64491e+07	1.34292e+07	5.41897e+07	4.46027e+07					3.58363	8.07	17	22	0	0.81	3	4	5.35045	6.11	14	18	0	0.72	3	6	3.256	6.07	15	18					4.95777	7.66	20	23					10.8632	8.26
Q502W7	Coiled-coil domain-containing protein 38 OS=Homo sapiens GN=CCDC38 PE=2 SV=1 - [CCD38_HUMAN]	33.21	1	1	16	44	977760	3.67686e+06	2.44485e+06	1.34969e+07	63227693					0	8.35	3	3					2.05858	7.28	4	5					0	8.88	5	6					1.63253	4.44	2	2					0	7.99
P00747	Plasminogen OS=Homo sapiens GN=PLG PE=1 SV=2 - [PLMN_HUMAN]	33.21	3	1	18	26	0	252213	0	9.37717e+07	2.00832e+07													0	6.54	2	2					0	5.31	2	2					0	9.88	5	7					5.11354	9.63
A6NM69	Uncharacterized protein OS=Homo sapiens GN=SCP2 PE=3 SV=2 - [A6NM69_HUMAN]	33.2	6	5	17	84	1.18453e+07	2.45238e+06	1.15445e+07	2.02392e+07	7.19348e+08	40.02	2.39	1	2	4.88397	13.32	4	5	33.23	4.57	2	2	4.58261	15.71	6	7					2.50913	12.92	4	5					5.46821	8.55	5	8	44.18	6.56	3	3	11.034	9.54
Q86YB8	ERO1-like protein beta OS=Homo sapiens GN=ERO1LB PE=1 SV=2 - [ERO1B_HUMAN]	33.19	1	2	13	20	1.51404e+06	4.8689e+06	2.01801e+06	190680	2.57624e+06					0	7.49	3	5					0	7.71	3	4					0	6.85	2	2					0	1.71	1	1					0	2.78
E9PDU2	Uncharacterized protein OS=Homo sapiens GN=RIBC1 PE=4 SV=2 - [E9PDU2_HUMAN]	33.19	1	1	8	15	0	0	1.16313e+07	2.05871e+07	2.57818e+07																					0	5.04	1	1					0	21.43	6	10					0	15.97
B4DZI8	Coatomer protein complex, subunit beta 2 (Beta prime), isoform CRA_b OS=Homo sapiens GN=COPB2 PE=2 SV=1 - [B4DZI8_HUMAN]	33.18	2	6	25	52	865583	1.49692e+06	542732	4.25531e+07	2.72922e+06					0	0.68	1	1	0	0.68	1	2	0	7.75	4	4					1.74266	10.6	5	6	47.27	3.31	2	2	7.28456	12.09	8	8					1.62068	2.51
F5HGG6	Uncharacterized protein OS=Homo sapiens GN=CTSC PE=2 SV=1 - [F5HGG6_HUMAN]	33.18	4	4	11	18	0	0	0	9.16492e+06	2.79397e+08													0	2.69	1	1					0	7.62	2	2					1.61665	5.83	3	3					2.3482	8.74
O15061	Synemin OS=Homo sapiens GN=SYNM PE=1 SV=2 - [SYNEM_HUMAN]	33.16	4	17	52	186	2.62356e+07	1.35682e+07	1.26483e+07	1.01505e+08	3.05726e+07	221.354	9.07	13	22	34.856	9.46	13	18	148.879	7.73	12	20	34.8267	11.95	17	22	129.438	6.2	9	16	24.2283	11.18	16	23	87.97	3.13	5	5	8.35123	7.6	11	13	63.26	2.56	4	5	5.46968	8.56
Q7L2H7	Eukaryotic translation initiation factor 3 subunit M OS=Homo sapiens GN=EIF3M PE=1 SV=1 - [EIF3M_HUMAN]	33.16	4	7	14	47	1.33263e+06	1.09371e+06	0	5.37365e+06	5.57058e+07					0	10.96	3	5	57.22	4.81	1	1	6.01332	7.75	2	2					3.53808	13.9	3	3	77.05	13.1	4	5	11.2661	18.45	6	8	65.09	12.57	3	4	12.1655	24.33
Q9NUQ6	SPATS2-like protein OS=Homo sapiens GN=SPATS2L PE=1 SV=2 - [SPS2L_HUMAN]	33.15	6	1	18	37	960161	288114	708484	1.20714e+07	1.86455e+07					0	5.02	2	2					0	4.12	2	4					0	8.42	3	4					1.86732	9.32	6	7					0	11.65
Q9ULC0-2	Isoform 2 of Endomucin OS=Homo sapiens GN=EMCN - [MUCEN_HUMAN]	33.15	3	1	4	14	0	0	0	1.65419e+07	256349													0	10.67	1	1									84.93	7.87	1	2	7.55976	22.47	3	4	58.48	7.87	1	2	6.57188	7.87
E9PER8	Uncharacterized protein OS=Homo sapiens GN=ARL6IP5 PE=4 SV=1 - [E9PER8_HUMAN]	33.13	6	3	6	101	963145	1.18649e+06	817487	4.16112e+07	4.01813e+07	109.56	22.29	3	5	14.76	22.29	3	6	277.163	22.29	3	8	25.8979	26.51	4	9	178.64	22.29	3	7	19.4694	22.29	3	7	278.21	22.29	3	7	26.9243	22.29	3	9	240.784	22.29	3	8	24.8054	22.29
Q15417	Calponin-3 OS=Homo sapiens GN=CNN3 PE=1 SV=1 - [CNN3_HUMAN]	33.13	3	1	10	24	1.79287e+06	0	1.58389e+06	1.06996e+07	1.29435e+07					0	1.82	1	1					0	6.38	2	3					0	11.25	3	3					5.60715	10.64	3	4	20.6	3.04	1	2	3.77221	13.37
P63244	Guanine nucleotide-binding protein subunit beta-2-like 1 OS=Homo sapiens GN=GNB2L1 PE=1 SV=3 - [GBLP_HUMAN]	33.12	17	8	12	74	1.574e+06	2.2866e+06	1.60635e+06	2.13829e+07	1.51088e+07	44.38	13.25	4	7	7.40597	11.36	4	7	51.3	12.3	4	6	11.7759	15.46	6	8	48.38	9.46	3	6	9.10659	9.46	3	5	89.11	15.46	4	5	4.5871	13.88	4	5	84.07	11.36	4	6	6.98828	10.41
Q6NUK1	Calcium-binding mitochondrial carrier protein SCaMC-1 OS=Homo sapiens GN=SLC25A24 PE=1 SV=2 - [SCMC1_HUMAN]	33.12	2	6	17	96	850675	1.40487e+06	1.09614e+06	2.01563e+07	2.02669e+07	184.055	6.08	2	4	13.2489	10.27	4	6	160.44	6.08	2	4	14.1295	9.22	3	5	96.3048	6.08	2	4	12.6606	11.11	4	6	115.258	12.58	7	12	16.0186	10.9	6	11	153.146	10.9	6	11	21.8763	16.35
Q8TDE3	Ribonuclease 8 OS=Homo sapiens GN=RNASE8 PE=1 SV=1 - [RNAS8_HUMAN]	33.12	1	1	3	8	0	0	0	12443155	0					0	12.99	1	1					1.67004	31.82	2	2					0	31.82	2	2					0	12.99	1	1					0	12.99
Q9HC77	Centromere protein J OS=Homo sapiens GN=CENPJ PE=1 SV=2 - [CENPJ_HUMAN]	33.11	3	1	41	81	2.81623e+06	2.0974e+06	3.13084e+06	9.913e+07	8.90446e+07					2.10949	4.78	5	6					0	5.83	6	6					0	6.35	7	9	0	1.57	3	4	3.30284	10.76	11	15	0	2.17	4	6	1.60307	4.78
Q5T8U2	Ribosomal protein L7a OS=Homo sapiens GN=RPL7A PE=4 SV=1 - [Q5T8U2_HUMAN]	33.11	4	2	5	27	0	600794	0	2.0379e+07	1.80122e+07													0	10.6	2	4					0	10.6	2	3					3.37464	12.58	2	4	25.59	17.22	3	5	1.66914	10.6
A8MVU7	Uncharacterized protein OS=Homo sapiens GN=HLA-F PE=3 SV=2 - [A8MVU7_HUMAN]	33.1	23	2	8	54	3.98634e+06	6.36667e+06	4.02403e+06	2.9372e+07	3.09763e+07	24.83	4.37	2	3	3.13111	10.34	3	4	62.41	2.99	1	2	6.10389	2.99	1	2	44.26	4.37	2	4	5.51958	17.01	4	6	69.48	9.89	3	6	13.3558	6.67	2	5	66.86	6.67	2	6	16.1459	6.67
Q8WY22	BRI3-binding protein OS=Homo sapiens GN=BRI3BP PE=1 SV=1 - [BRI3B_HUMAN]	33.07	1	1	9	39	697724	0	956814	1.15647e+07	2.08243e+07	22.79	6.77	1	2	4.95194	6.77	1	2									59.49	6.77	1	2	5.84655	11.16	2	3	67.943	6.77	1	2	6.79507	14.74	2	3	43.39	6.77	1	1	2.89303	22.31
F8W9S4	Uncharacterized protein OS=Homo sapiens GN=WDR20 PE=4 SV=1 - [F8W9S4_HUMAN]	33.07	8	1	12	23	5.39979e+06	0	4.05747e+06	1.46734e+08	0					0	2.76	1	2					0	15.94	3	4					0	26.38	8	10					0	4.53	2	2
Q9NX40	OCIA domain-containing protein 1 OS=Homo sapiens GN=OCIAD1 PE=1 SV=1 - [OCAD1_HUMAN]	33.06	16	3	7	17	0	2.99861e+06	686273	1.12629e+07	7.79907e+06													0	7.76	2	2					0	9.39	2	2	29.24	3.27	1	2	0	11.84	3	5					0	11.84
Q5SZL2	Coiled-coil domain-containing protein C6orf204 OS=Homo sapiens GN=C6orf204 PE=1 SV=1 - [CF204_HUMAN]	33.04	16	1	28	48	5.4066e+06	1.74011e+06	303546	5.20237e+07	1.11402e+07					0	8.32	5	5					0	3.98	3	4					1.6013	17.14	9	11					0	9.07	6	6					0	10.06
P09622	Dihydrolipoyl dehydrogenase, mitochondrial OS=Homo sapiens GN=DLD PE=1 SV=2 - [DLDH_HUMAN]	33.01	5	8	14	151	1643111	2.05649e+06	1.52546e+06	4.21173e+07	3.09274e+07	160.19	4.91	2	5	20.8158	7.27	3	9	221.683	9.82	4	7	22.4845	14.73	6	12	186.467	9.63	4	7	24.0086	18.07	6	11	242.37	14.34	6	16	27.055	15.52	6	15	166.74	17.29	8	14	31.3371	17.29
P05114	Non-histone chromosomal protein HMG-14 OS=Homo sapiens GN=HMGN1 PE=1 SV=3 - [HMGN1_HUMAN]	33	3	1	4	11	325335	527349	303561	0	0					0	8	1	1					1.7103	10	1	1					1.6645	10	1	2
P29803	Pyruvate dehydrogenase E1 component subunit alpha, testis-specific form, mitochondrial OS=Homo sapiens GN=PDHA2 PE=1 SV=1 - [ODPAT_HUMAN]	32.99	1	1	12	23	686914	608996	2.23059e+06	3.25454e+07	17516.6					1.63821	7.73	3	4					0	12.63	3	3					0	6.44	3	4					0	12.37	2	3					0	4.12
O43298	Zinc finger and BTB domain-containing protein 43 OS=Homo sapiens GN=ZBTB43 PE=1 SV=1 - [ZBT43_HUMAN]	32.98	1	1	9	29	39828777	2.02732e+06	3.99498e+07	2.06939e+07	1.75101e+07	0	2.14	1	6	2.01589	2.14	1	1					0	7.71	1	2	0	2.14	1	6	2.11959	4.93	2	5					0	17.77	3	3					0	7.07
Q9BPU6	Dihydropyrimidinase-related protein 5 OS=Homo sapiens GN=DPYSL5 PE=1 SV=1 - [DPYL5_HUMAN]	32.98	2	1	14	26	1.14955e+07	5.79653e+06	1.06298e+07	1.89829e+07	0					0	5.32	2	3	0	1.24	1	2	0	10.82	3	3					0	1.24	1	2					0	8.69	3	3					2.06067	5.5
E9PH60	Protein Wnt OS=Homo sapiens GN=WNT16 PE=3 SV=1 - [E9PH60_HUMAN]	32.96	1	1	8	12	754039	6.85337e+06	0	0	6.17653e+06					0	3.1	1	1	0	1.97	1	2									0	3.1	1	1									40.7537	1.97	1	2	0	2.54
Q13087-2	Isoform 2 of Protein disulfide-isomerase A2 OS=Homo sapiens GN=PDIA2 - [PDIA2_HUMAN]	32.95	3	9	18	110	955999	773507	512190	6.6324e+06	5.78332e+07	158.008	8.24	3	4	17.5498	15.52	5	9	198.034	8.24	3	5	15.8961	8.24	3	5	151.77	5.36	2	3	12.7783	10.34	4	6	69.72	2.3	1	2	11.4166	4.98	2	7					8.69154	13.6
E7ESC7	Uncharacterized protein OS=Homo sapiens GN=MAEA PE=4 SV=1 - [E7ESC7_HUMAN]	32.95	1	1	15	27	2.49976e+07	1.95161e+06	598004	1.11805e+08	4.99569e+07					0	7.37	2	3					0	11.06	3	3					2.1824	8.53	2	2					1.64429	13.13	5	6					0	15.44
P25789	Proteasome subunit alpha type-4 OS=Homo sapiens GN=PSMA4 PE=1 SV=1 - [PSA4_HUMAN]	32.95	1	2	8	27	0	2.91301e+06	0	7.66261e+06	9.87617e+06					0	2.3	1	1					0	4.21	1	2					1.80876	9.58	2	4					1.76647	12.64	3	4	22.32	9.96	2	3	5.55361	13.41
P49913	Cathelicidin antimicrobial peptide OS=Homo sapiens GN=CAMP PE=1 SV=1 - [CAMP_HUMAN]	32.94	1	2	7	20	0	0	0	7.24486e+06	6.6086e+06					0	7.06	1	1					0	12.35	2	2									42.4	10	2	3	2.6149	10	2	3	57.1	10	2	4	5.24181	20
P14207	Folate receptor beta OS=Homo sapiens GN=FOLR2 PE=1 SV=4 - [FOLR2_HUMAN]	32.94	5	1	6	21	0	511212	9.42337e+06	6.6937e+06	6.53671e+06													0	5.49	1	1					0	3.92	1	1					0	7.06	2	2	40.2	3.92	1	2	4.49908	10.98
Q9UI08	Ena/VASP-like protein OS=Homo sapiens GN=EVL PE=1 SV=2 - [EVL_HUMAN]	32.93	4	3	11	41	1.41211e+06	2.33459e+06	2.12309e+06	1.80365e+07	3.17697e+07					5.65843	14.42	3	6					0	4.81	1	2					0	9.38	2	2	33.01	12.98	4	5	3.16445	12.98	5	6	24.54	10.34	3	4	4.21644	13.94
Q96CX2	BTB/POZ domain-containing protein KCTD12 OS=Homo sapiens GN=KCTD12 PE=1 SV=1 - [KCD12_HUMAN]	32.92	3	7	11	56	453202	416850	378850	3.89256e+07	6.78008e+07	27.32	8	2	3	4.03789	12.31	4	5	34.77	8.31	2	3	7.23846	8.31	2	3	49.19	8.31	2	3	9.7601	8.31	2	4	112.713	18.15	6	8	13.0284	18.15	6	9	117.167	13.23	5	7	10.5643	17.23
P36871	Phosphoglucomutase-1 OS=Homo sapiens GN=PGM1 PE=1 SV=3 - [PGM1_HUMAN]	32.92	4	8	19	73	485154	0	880888	5.44075e+07	6.58956e+06					0	3.74	1	1													0	6.94	2	2	190.13	8.54	4	6	16.4355	19.4	10	13	133.057	13.52	7	11	18.5789	14.41
Q92925-3	Isoform 3 of SWI/SNF-related matrix-associated actin-dependent regulator of chromatin subfamily D member 2 OS=Homo sapiens GN=SMARCD2 - [SMRD2_HUMAN]	32.92	4	2	12	34	6.81282e+06	9.07206e+06	9.41706e+06	3.70983e+08	519233748					3.67399	15.53	5	8					0	6.63	3	4					4.56712	17.39	5	9					0	4.97	2	4					0	1.66
Q8TBZ0-2	Isoform 2 of Coiled-coil domain-containing protein 110 OS=Homo sapiens GN=CCDC110 - [CC110_HUMAN]	32.91	3	2	23	40	0	1.75238e+06	843765	2.17528e+07	1.57526e+07					0	3.52	1	1					0	7.79	4	5					4.11433	9.8	6	8					0	4.9	4	4					0	8.29
Q9BTE7	DCN1-like protein 5 OS=Homo sapiens GN=DCUN1D5 PE=1 SV=1 - [DCNL5_HUMAN]	32.91	6	1	8	11	0	0	0	7.13242e+06	1.04778e+07																					0	8.86	1	1					1.65615	12.66	3	3					0	8.86
O75363-2	Isoform 2 of Breast carcinoma-amplified sequence 1 OS=Homo sapiens GN=BCAS1 - [BCAS1_HUMAN]	32.9	4	2	17	28	253652	834272	0	6.4554e+06	1.61546e+07					0	1.14	1	1					1.60626	4.07	2	2													1.71312	9.45	4	4					1.83155	9.28
Q9NTX5	Enoyl-CoA hydratase domain-containing protein 1 OS=Homo sapiens GN=ECHDC1 PE=1 SV=2 - [ECHD1_HUMAN]	32.9	5	3	9	25	4.7021e+06	4667472	3.59908e+06	7.28143e+07	5.269e+07					0	6.51	2	2					0	2.93	1	1					0	2.93	1	1	0	11.4	3	4	4.22496	14.66	3	4					5.90968	23.45
C9JT69	Uncharacterized protein OS=Homo sapiens GN=ETFDH PE=4 SV=1 - [C9JT69_HUMAN]	32.88	3	8	15	35	193500	0	348570	4.22969e+06	2.45557e+07					0	5.99	2	2													1.81618	5.82	2	2					2.50983	8.56	2	2					0	4.45
P12273	Prolactin-inducible protein OS=Homo sapiens GN=PIP PE=1 SV=1 - [PIP_HUMAN]	32.88	1	1	3	7	0	365503	0	0	0					2.00339	8.22	1	1	27.2	8.22	1	1	2.46571	25.34	2	2	34.53	8.22	1	1	2.54013	8.22	1	1													0	7.53
Q8NBX0	Probable saccharopine dehydrogenase OS=Homo sapiens GN=SCCPDH PE=1 SV=1 - [SCPDH_HUMAN]	32.87	2	2	7	15	537019	230049	0	4.42762e+06	2.15264e+06					0	13.05	3	4					0	3.26	1	2					0	3.26	1	1					0	15.38	3	3					1.73341	4.9
P05165	Propionyl-CoA carboxylase alpha chain, mitochondrial OS=Homo sapiens GN=PCCA PE=1 SV=4 - [PCCA_HUMAN]	32.83	4	6	21	73	2.76441e+06	546203	779559	7.16386e+06	5.44456e+06	0	1.65	1	1	1.95164	7.55	4	4	29.85	6.32	3	5	14.4998	13.46	7	10					0	3.98	2	2	38.87	2.2	1	2	5.68808	10.3	5	7	41.02	2.2	1	2	5.20449	3.57
F8W6Z6	Uncharacterized protein OS=Homo sapiens GN=PSAP PE=4 SV=1 - [F8W6Z6_HUMAN]	32.83	8	5	14	39	668864	1.70066e+06	1.06036e+06	2.11988e+07	0					2.04767	6.64	3	3					0	11.39	3	4					0	5.31	3	5					0	1.33	1	1					1.69289	8.92
Q9Y230	RuvB-like 2 OS=Homo sapiens GN=RUVBL2 PE=1 SV=3 - [RUVB2_HUMAN]	32.83	2	1	13	22	655221	661616	948654	8.03088e+06	0					0	4.54	3	3					0	8.21	3	3					1.60218	7.56	2	3					0	12.1	2	2
Q6UXI9-2	Isoform 2 of Nephronectin OS=Homo sapiens GN=NPNT - [NPNT_HUMAN]	32.81	7	1	12	24	217588	363749	0	3.40566e+07	0					0	5.3	2	4					0	9.04	2	2					0	2.75	1	2					1.61842	12.77	3	4					0	11.59
Q10589	Bone marrow stromal antigen 2 OS=Homo sapiens GN=BST2 PE=1 SV=1 - [BST2_HUMAN]	32.78	2	2	5	13	0	475668	0	0	3.79399e+07					1.93879	7.22	1	1					4.04398	17.78	2	3					0	10.56	1	1									47.2	8.33	1	1	5.89359	27.22
Q5SQN1	Synaptosomal-associated protein 47 OS=Homo sapiens GN=SNAP47 PE=2 SV=3 - [SNP47_HUMAN]	32.76	2	1	13	20	4.0836e+06	1.75273e+06	2.53772e+06	1.89738e+08	86893015					3.4881	6.9	3	3					0	10.34	4	4					0	10.56	3	3					0	5.39	2	3					0	12.28
O60282	Kinesin heavy chain isoform 5C OS=Homo sapiens GN=KIF5C PE=1 SV=1 - [KIF5C_HUMAN]	32.71	6	2	32	81	7.38611e+06	4.08981e+06	7.09246e+06	1.46001e+08	76457026	0	3.03	3	6	6.40914	9.51	7	9					0	3.55	3	3	0	3.66	4	6	6.70721	12.43	10	12	0	0.73	1	1	6.77586	9.4	7	9					8.11446	8.46
Q8WXX5	DnaJ homolog subfamily C member 9 OS=Homo sapiens GN=DNAJC9 PE=1 SV=1 - [DNJC9_HUMAN]	32.69	1	1	11	23	890434	217623	0	1.08568e+07	8.50343e+06	65.4433	4.23	1	2	4.44497	9.23	3	4	79.86	4.23	1	2	4.17736	11.54	3	5	27.82	4.23	1	1	0	10	2	2					0	4.62	1	1					0	10.38
Q9Y2Y9	Krueppel-like factor 13 OS=Homo sapiens GN=KLF13 PE=1 SV=1 - [KLF13_HUMAN]	32.64	1	1	9	20	3.09872e+07	2.47421e+07	1.08158e+06	3.08913e+07	3.27062e+07					0	10.76	2	3					0	18.06	4	5					0	11.11	2	2					0	3.82	2	3					0	8.33
E9PBJ5	Uncharacterized protein OS=Homo sapiens GN=SDHA PE=4 SV=1 - [E9PBJ5_HUMAN]	32.63	4	9	17	122	977135	1.69127e+06	943935	3.11105e+07	1.08278e+07	61.4465	8.44	4	7	18.4823	12.82	6	9	158.959	6.49	3	7	23.5764	11.04	5	9	76.0627	4.22	2	6	15.2027	8.77	3	8					12.3991	9.9	5	8	56.3478	8.28	4	6	12.5601	10.71
Q08170	Serine/arginine-rich splicing factor 4 OS=Homo sapiens GN=SRSF4 PE=1 SV=2 - [SRSF4_HUMAN]	32.59	6	4	20	51	1.99748e+06	2.51165e+06	2.21238e+06	1.10721e+07	1.87787e+07	46.24	2.63	1	2	4.89436	8.1	3	4	63.7458	2.63	1	2	6.07886	10.53	5	7	83.8429	4.05	2	3	5.89358	8.1	4	5	52.23	2.63	1	1	7.01885	9.72	5	5	50.19	2.63	1	1	5.43412	11.34
P13797	Plastin-3 OS=Homo sapiens GN=PLS3 PE=1 SV=4 - [PLST_HUMAN]	32.54	4	4	19	72	2.71018e+06	6.03234e+06	2.97641e+06	4.02304e+07	4.06276e+07					3.4868	9.52	4	5					1.96805	3.97	2	2					1.80234	4.44	2	3	160.863	5.87	4	9	19.7462	15.87	8	15	142.047	11.11	6	8	17.2539	15.71
A8MTS3	Uncharacterized protein OS=Homo sapiens PE=4 SV=1 - [A8MTS3_HUMAN]	32.53	1	1	4	9	4.8924e+06	4.63092e+06	3.58302e+06	0	9.44865e+07					0	6.63	1	1					0	6.63	1	1					0	6.63	1	1													0	19.88
P05451	Lithostathine-1-alpha OS=Homo sapiens GN=REG1A PE=1 SV=3 - [REG1A_HUMAN]	32.53	1	1	4	11	1.6612e+07	0	1.30585e+07	0	5.4879e+06					0	6.02	1	2													0	6.02	1	3													0	16.27
Q9P0M6	Core histone macro-H2A.2 OS=Homo sapiens GN=H2AFY2 PE=1 SV=3 - [H2AW_HUMAN]	32.53	2	1	10	21	0	3.7689e+06	347820	4.90518e+06	1.85754e+07													4.7896	12.37	3	4					0	7.26	2	2	0	2.42	1	2	4.18877	8.87	3	4					2.00554	3.49
Q9NRQ2	Phospholipid scramblase 4 OS=Homo sapiens GN=PLSCR4 PE=1 SV=2 - [PLS4_HUMAN]	32.52	3	1	5	8	1.33877e+06	1.03379e+06	0	6.23003e+06	0					0	22.8	3	3					0	5.78	1	1									23.98	3.95	1	2	4.26118	3.95	1	2
Q96AJ9	Vesicle transport through interaction with t-SNAREs homolog 1A OS=Homo sapiens GN=VTI1A PE=1 SV=1 - [VTI1A_HUMAN]	32.51	2	1	8	23	381848	361306	0	8.77875e+06	6.03875e+06					5.81035	23.65	4	4					1.69281	11.82	2	2					1.94374	6.9	1	1					1.73153	8.87	2	3					0	7.39
O14558	Heat shock protein beta-6 OS=Homo sapiens GN=HSPB6 PE=1 SV=2 - [HSPB6_HUMAN]	32.5	2	1	4	8	0	0	0	254344	6531780																													0	8.75	1	1					0	23.75
E9PET5	Uncharacterized protein OS=Homo sapiens GN=FAM193B PE=4 SV=1 - [E9PET5_HUMAN]	32.48	6	1	21	49	1.26e+07	9.15673e+06	955800	5.10311e+07	4.73459e+07					0	11.92	5	6					0	4.87	3	3					0	17.76	6	6					1.72208	16.3	8	13					3.45814	9.85
P08621-2	Isoform 2 of U1 small nuclear ribonucleoprotein 70 kDa OS=Homo sapiens GN=SNRNP70 - [RU17_HUMAN]	32.48	3	2	11	28	1.92906e+06	1.28447e+07	1.12388e+07	1.16457e+07	8.83679e+06					0	8.88	1	1					1.83534	5.37	2	2					1.74044	14.25	3	3	0	1.64	1	2	0	7.71	3	3	0	3.5	2	3	0	11.21
P46781	40S ribosomal protein S9 OS=Homo sapiens GN=RPS9 PE=1 SV=3 - [RS9_HUMAN]	32.47	5	6	9	37	0	0	0	1.81329e+07	1.61891e+07									33.49	7.73	1	1	2.87817	7.73	1	1									27.76	11.86	3	5	10.0172	19.59	4	7	35.98	11.86	3	4	6.35911	25.77
P02538	Keratin, type II cytoskeletal 6A OS=Homo sapiens GN=KRT6A PE=1 SV=3 - [K2C6A_HUMAN]	32.45	17	3	22	251	3.308e+07	3.06942e+07	2.8022e+07	1.75168e+08	1.45687e+08	89.6145	10.64	8	15	28.0646	9.57	7	15	114.075	9.57	7	16	26.1433	16.67	9	18	118.083	12.23	9	20	29.1878	11.7	8	18	82.9355	10.64	8	18	22.8068	12.59	8	19	85.0412	10.46	8	18	26.6274	10.46
P43034	Platelet-activating factor acetylhydrolase IB subunit alpha OS=Homo sapiens GN=PAFAH1B1 PE=1 SV=2 - [LIS1_HUMAN]	32.44	4	2	10	19	0	1.22091e+06	0	3.35902e+07	2.05073e+07													2.02142	6.59	2	2					0	3.41	1	1					0	15.61	3	3					0	5.61
P22105	Tenascin-X OS=Homo sapiens GN=TNXB PE=1 SV=3 - [TENX_HUMAN]	32.43	14	45	91	469	1.77581e+06	1.72979e+06	1.42703e+06	9.07737e+07	7.42663e+07	213.959	7.32	12	19	47.22	9.09	14	21	262.522	9.42	15	21	48.3368	9.77	19	26	199.593	6.41	10	15	50.201	10.05	20	32	825.822	15.71	32	57	133.402	20.63	45	79	937.676	17.35	38	68	151.487	20.38
Q96RQ3	Methylcrotonoyl-CoA carboxylase subunit alpha, mitochondrial OS=Homo sapiens GN=MCCC1 PE=1 SV=3 - [MCCA_HUMAN]	32.41	7	4	20	36	1.5982e+06	1243528	1.31658e+06	54876132	1.85877e+08					0	8.41	4	4					0	8.41	4	4	0	0.97	1	2	0	6.48	4	4	0	0.97	1	2	0	4.55	1	1					0	6.48
P50440	Glycine amidinotransferase, mitochondrial OS=Homo sapiens GN=GATM PE=1 SV=1 - [GATM_HUMAN]	32.39	3	1	12	23	1.92379e+06	2.34956e+06	0	3.91816e+06	7.43628e+07					0	15.37	5	5					0	9.69	3	3					0	4.02	1	1					0	1.89	1	1					0	9.46
Q15361	Transcription termination factor 1 OS=Homo sapiens GN=TTF1 PE=1 SV=3 - [TTF1_HUMAN]	32.38	2	1	21	41	3.11711e+06	12099313	2.68752e+06	1.29732e+08	130719937					0	6.96	4	4					0	10.61	7	9					0	10.61	5	5					5.75161	10.94	5	6					1.81661	4.97
P0CG38	POTE ankyrin domain family member I OS=Homo sapiens GN=POTEI PE=3 SV=1 - [POTEI_HUMAN]	32.37	22	1	30	501	2.23182e+08	2.1801e+08	1.93223e+08	1079352977	1.02781e+09	578.202	7.44	6	33	88.9722	15.44	13	52	624.266	4.84	5	34	85.3937	15.44	12	48	603.31	7.44	6	37	77.0265	10.98	10	43	377.242	8.84	8	34	69.8048	12.65	11	41	455.384	7.44	8	30	64.3745	12.47
P07686	Beta-hexosaminidase subunit beta OS=Homo sapiens GN=HEXB PE=1 SV=3 - [HEXB_HUMAN]	32.37	2	6	15	36	924339	0	498266	5.57493e+07	2.72416e+06					0	6.83	3	3													0	3.78	2	2	39.2967	9.71	5	8	6.00211	14.75	6	8	30.94	2.88	1	1	2.07606	2.88
Q99747	Gamma-soluble NSF attachment protein OS=Homo sapiens GN=NAPG PE=1 SV=1 - [SNAG_HUMAN]	32.37	1	1	11	16	2.9687e+06	741754	763588	1.25756e+07	1.01601e+07					0	4.49	1	1					0	4.49	1	3					0	6.41	2	2					0	14.42	3	3					0	10.9
B4DLN1	Uncharacterized protein OS=Homo sapiens GN=SLC25A10 PE=2 SV=1 - [B4DLN1_HUMAN]	32.35	3	2	13	17	0	1.63228e+06	272091	1.18611e+07	5.62035e+07													0	5.2	1	1					0	5.2	1	1					1.60374	9.28	3	3					0	7.47
A4FU49	SH3 domain-containing protein 21 OS=Homo sapiens GN=SH3D21 PE=1 SV=2 - [SH321_HUMAN]	32.34	2	1	19	34	2.48445e+07	1.00569e+06	1.97718e+07	4.43857e+08	2.81028e+07					0	4.53	2	2					0	2.5	1	1					1.91779	8.75	5	5					0	11.25	5	5					4.2314	9.38
P14543-2	Isoform 2 of Nidogen-1 OS=Homo sapiens GN=NID1 - [NID1_HUMAN]	32.32	2	18	31	302	6.55953e+06	2.27021e+06	2.82599e+06	6.24324e+07	5.40754e+07	444.09	13.11	10	26	77.5108	16.97	16	35	453.65	18.22	16	33	73.0489	20.56	16	34	367.136	19.03	17	31	66.3215	22.17	19	36	450.442	14.9	14	26	60.4148	14.54	14	29	382.773	10.86	10	18	44.4116	14.72
O75665	Oral-facial-digital syndrome 1 protein OS=Homo sapiens GN=OFD1 PE=1 SV=1 - [OFD1_HUMAN]	32.31	4	2	32	70	1.52376e+07	2.67254e+07	1.27889e+07	1.21985e+08	67548097	0	2.17	3	6	0	5.43	5	5	0	2.47	3	8	3.2836	7.81	7	9	0	1.28	2	6	0	10.47	7	8					5.11198	10.97	10	11					1.91866	2.47
P29992	Guanine nucleotide-binding protein subunit alpha-11 OS=Homo sapiens GN=GNA11 PE=1 SV=2 - [GNA11_HUMAN]	32.31	1	2	12	20	0	0	6.18698e+06	1.12598e+07	2.68647e+07					0	1.95	1	1					0	3.34	1	1					0	2.51	1	1					2.81585	16.99	4	4	21.84	3.06	1	2	3.65688	13.09
D9IX68	Platelet glycoprotein IV variant OS=Homo sapiens GN=CD36 PE=2 SV=1 - [D9IX68_HUMAN]	32.29	12	5	8	47	0	0	0	4.80977e+07	4.21645e+07					0	10.42	1	1																	95.656	14.24	5	10	12.0664	14.24	5	10	97.0673	14.24	5	10	12.7038	23.26
E9PES0	Deoxyribonuclease OS=Homo sapiens GN=DNASE1L3 PE=3 SV=1 - [E9PES0_HUMAN]	32.29	2	1	6	11	1.39602e+07	2.80303e+07	1.89266e+07	0	1.33626e+08					0	18.75	2	2					0	7.29	1	1					0	7.29	1	1													0	11.81
B7Z972	Protein-L-isoaspartate O-methyltransferase OS=Homo sapiens GN=PCMT1 PE=2 SV=1 - [B7Z972_HUMAN]	32.29	3	1	6	11	0	1.73907e+06	0	0	0													0	5.73	1	1
P23771	Trans-acting T-cell-specific transcription factor GATA-3 OS=Homo sapiens GN=GATA3 PE=1 SV=1 - [GATA3_HUMAN]	32.28	2	1	11	59	1.94988e+07	3.23397e+07	1.58657e+07	5.63472e+07	5.2784e+07					0	15.35	3	11					0	14	4	8					0	15.58	4	13					1.75312	20.09	5	10					0	15.58
P61966	AP-1 complex subunit sigma-1A OS=Homo sapiens GN=AP1S1 PE=1 SV=1 - [AP1S1_HUMAN]	32.28	1	1	3	10	0	1.2591e+06	0	584828810	628371608													0	12.03	1	1													0	12.03	1	1					0	12.03
F6XZQ7	Uncharacterized protein OS=Homo sapiens GN=GSTM2 PE=3 SV=1 - [F6XZQ7_HUMAN]	32.27	8	1	6	22	0	0	0	1.27746e+07	8.34951e+06																									67.3427	11.82	2	3	7.41194	14.55	3	4	65.34	17.27	3	5	15.0602	20
Q96N16-2	Isoform 2 of Janus kinase and microtubule-interacting protein 1 OS=Homo sapiens GN=JAKMIP1 - [JKIP1_HUMAN]	32.25	12	2	24	70	1.90688e+06	5.33547e+06	1.19204e+06	7.6336e+07	7.71004e+07	0	1.32	1	3	2.06945	6.86	3	5	0	2.05	2	3	0	10.23	6	9					1.66705	8.54	4	6					7.7206	14.2	10	14					8.73351	11.79
Q93084-2	Isoform SERCA3A of Sarcoplasmic/endoplasmic reticulum calcium ATPase 3 OS=Homo sapiens GN=ATP2A3 - [AT2A3_HUMAN]	32.23	7	7	30	131	1.77976e+06	2.59916e+06	1.75507e+06	2.72656e+07	1.34231e+07	110.68	6.31	5	10	25.1088	13.61	9	16	208.108	6.01	5	11	32.8643	12.71	10	19	140.29	5.31	4	6	20.3216	10.71	8	12	134.95	5.11	4	5	14.5565	12.11	10	15	107.07	5.31	5	8	12.0494	10.61
Q9UHF1	Epidermal growth factor-like protein 7 OS=Homo sapiens GN=EGFL7 PE=1 SV=3 - [EGFL7_HUMAN]	32.23	1	1	8	9	861391	0	0	0	7.35286e+06					0	17.22	3	3					0	9.89	2	2					1.69497	6.96	1	1													0	9.89
P42704	Leucine-rich PPR motif-containing protein, mitochondrial OS=Homo sapiens GN=LRPPRC PE=1 SV=3 - [LPPRC_HUMAN]	32.21	4	17	38	159	356060	3.07958e+07	367706	9.67739e+07	1.28342e+08					8.51822	4.81	5	8	71.89	1.79	3	5	5.71987	5.6	6	8					5.98862	8.25	8	9	370.803	9.18	11	17	39.9413	11.05	12	18	441.246	9.97	13	23	45.107	11.98
A8KAH5	Uncharacterized protein OS=Homo sapiens GN=KIAA0174 PE=2 SV=1 - [A8KAH5_HUMAN]	32.19	7	1	9	19	668261	419192	451740	0	7.92751e+06					1.64476	11.35	3	4					0	2.64	1	1					0	4.49	1	1													0	17.68
Q13505	Metaxin-1 OS=Homo sapiens GN=MTX1 PE=1 SV=2 - [MTX1_HUMAN]	32.19	3	3	13	28	0	0	345053	1.44077e+07	9.27612e+06					0	4.51	1	1					0	5.36	2	2					1.67484	7.94	2	2					1.64908	17.6	6	7					1.85838	10.3
Q9H307-2	Isoform 2 of Pinin OS=Homo sapiens GN=PNN - [PININ_HUMAN]	32.19	2	3	19	43	1.00899e+06	512486	973218	1.68879e+07	5.07278e+06					0	4.97	4	4					0	7.88	4	6					1.69959	4.79	3	4					3.53594	9.93	5	6					3.7605	10.1
E7EPK6	Uncharacterized protein OS=Homo sapiens GN=RPS24 PE=4 SV=1 - [E7EPK6_HUMAN]	32.18	5	4	12	32	0	6.65736e+06	491271	1.52996e+07	9517425					1.8081	4.15	1	1	34.84	7.27	2	2	1.62142	8.65	2	2	37.26	5.19	1	2	4.90323	9	2	3					0	17.99	4	4	21.69	3.81	1	1	1.86111	3.81
O60749	Sorting nexin-2 OS=Homo sapiens GN=SNX2 PE=1 SV=2 - [SNX2_HUMAN]	32.18	2	3	17	56	0	0	2.74715e+06	8.35785e+06	1.25398e+07					0	7.32	3	3					0	2.12	1	1					0	13.1	5	6	172.547	7.13	3	6	13.1897	10.02	4	7	165.074	11.56	5	9	22.5902	16.76
Q9NX65	Zinc finger protein 434 OS=Homo sapiens GN=ZNF434 PE=2 SV=2 - [ZN434_HUMAN]	32.16	2	1	15	17	0	0	0	2.70578e+07	18882009					0	2.68	1	1													0	7.22	2	2					0	19.59	6	6					0	4.33
Q9NW13	RNA-binding protein 28 OS=Homo sapiens GN=RBM28 PE=1 SV=3 - [RBM28_HUMAN]	32.15	2	1	21	42	5.52771e+06	2.24249e+06	4.65009e+06	2.44195e+07	2.48578e+07					3.50277	6.59	3	5					1.72515	6.85	4	5					0	7.11	3	4	0	0.92	1	2	0	11.46	7	9	0	0.92	1	2	1.61491	10.28
C9J167	Uncharacterized protein OS=Homo sapiens GN=PMS2 PE=4 SV=2 - [C9J167_HUMAN]	32.14	4	1	15	31	1.37404e+06	2.07319e+06	1.06066e+06	1.74695e+07	1.13631e+07					0	10.71	4	4					0	5.03	2	5					0	6.22	3	3					0	8.73	5	5					3.4674	11.9
P01008	Antithrombin-III OS=Homo sapiens GN=SERPINC1 PE=1 SV=1 - [ANT3_HUMAN]	32.11	2	7	13	45	650811	768182	0	2.77923e+07	2.0431e+07					0	6.03	2	2					0	1.51	1	1					0	4.53	1	2	87.8867	9.27	4	7	8.76813	11.42	5	8	166.54	13.15	6	9	14.3097	15.95
F5H3W9	Uncharacterized protein OS=Homo sapiens GN=MYO1C PE=4 SV=1 - [F5H3W9_HUMAN]	32.09	6	17	33	165	1.38454e+06	1.54218e+06	1.60094e+06	4.52161e+07	2.51603e+07	70.98	3.93	4	5	9.37808	4.6	4	5	122.133	8.91	7	8	15.7138	10.73	9	10	150.28	8.62	7	13	35.2402	12.74	11	18	208.94	10.63	11	18	34.7648	15.8	15	24	193.681	9.58	10	19	36.1447	11.78
P09960	Leukotriene A-4 hydrolase OS=Homo sapiens GN=LTA4H PE=1 SV=2 - [LKHA4_HUMAN]	32.08	5	7	15	60	882433	3.93739e+06	839769	1.47278e+07	5.19434e+06					4.65797	5.89	2	2	101.117	2.95	1	3	10.6763	9.17	4	6	50.91	2.95	1	1	3.57781	2.95	1	1	46.5633	7.69	3	4	7.58676	13.42	6	8	57.0633	4.58	2	3	6.37759	10.15
Q9Y291	28S ribosomal protein S33, mitochondrial OS=Homo sapiens GN=MRPS33 PE=1 SV=1 - [RT33_HUMAN]	32.08	3	1	5	23	3.43588e+06	2.58662e+06	2.62228e+06	2.02075e+07	2.12684e+07					0	10.38	1	2					0	16.04	2	3					0	10.38	1	2					1.6671	28.3	3	4	28.04	12.26	2	4	0	17.92
Q6NZI2	Polymerase I and transcript release factor OS=Homo sapiens GN=PTRF PE=1 SV=1 - [PTRF_HUMAN]	32.05	4	9	12	196	6.1005e+06	6.97021e+06	9.37177e+06	1.18244e+08	1.27361e+08	526.466	21.03	6	15	53.7231	19.23	5	13	614.987	27.18	8	16	50.3464	27.18	8	16	479.031	29.23	9	17	50.1523	25.38	7	15	550.034	16.92	6	16	48.4868	16.92	6	18	883.205	16.92	6	20	71.9763	17.69
Q9Y508	RING finger protein 114 OS=Homo sapiens GN=RNF114 PE=1 SV=1 - [RN114_HUMAN]	32.02	3	1	7	16	0	700830	1.0656e+06	3.99451e+06	3.94311e+06					0	20.18	2	2					0	18.42	2	3					0	8.33	1	1					0	15.79	2	3					0	5.7
P98160	Basement membrane-specific heparan sulfate proteoglycan core protein OS=Homo sapiens GN=HSPG2 PE=1 SV=4 - [PGBM_HUMAN]	32	2	73	107	1093	8.73444e+06	1.02587e+07	7.18504e+06	1.24921e+08	1.08465e+08	1392.16	11.82	36	84	233.387	15.55	47	101	1319.87	12.37	38	82	230.186	16.62	52	104	1318.78	11.68	36	71	181.118	13.85	43	86	1840.78	14.89	54	113	269.101	18.56	62	133	2118.76	16.42	60	128	299.785	17.7
Q86WT6	Tripartite motif-containing protein 69 OS=Homo sapiens GN=TRIM69 PE=2 SV=2 - [TRI69_HUMAN]	32	1	1	10	18	1.49321e+06	1.64907e+06	1.43073e+06	3.74236e+06	7.22187e+06					0	9	3	3					0	12.6	3	3					0	9.8	2	2					0	4.8	1	1					0	7.2
P01621	Ig kappa chain V-III region NG9 (Fragment) OS=Homo sapiens PE=1 SV=1 - [KV303_HUMAN]	32	1	1	3	16	0	616056	385806	1.26225e+07	1.09093e+07													0	7	1	1					0	7	1	2					1.79786	16	2	3	0	16	2	4	1.80484	32
Q9Y2Y8	Proteoglycan 3 OS=Homo sapiens GN=PRG3 PE=1 SV=2 - [PRG3_HUMAN]	32	1	1	6	14	0	0	0	5.14706e+07	2.40001e+07																					0	15.56	2	2	0	2.67	1	2	3.85552	2.67	1	2	29.57	2.67	1	2	3.77004	8.89
Q12981-2	Isoform 2 of Vesicle transport protein SEC20 OS=Homo sapiens GN=BNIP1 - [SEC20_HUMAN]	31.96	2	1	6	19	2.76165e+06	0	1.86629e+06	2.32339e+07	4.56502e+07					0	15.98	2	3													0	15.98	1	1					0	10.82	1	2					1.64751	27.84
Q14315-2	Isoform 2 of Filamin-C OS=Homo sapiens GN=FLNC - [FLNC_HUMAN]	31.95	2	22	65	447	7.10716e+06	9.1207e+06	6.74097e+06	1.50132e+08	1.31714e+08	798.675	9.18	18	33	93.5341	10.59	20	40	862.817	10.36	21	42	117.102	15.45	29	55	784.73	9.06	19	35	90.9141	12.3	24	42	544.256	9.58	22	35	73.0031	14.04	31	49	472.181	9.06	22	36	65.1631	11.11
Q13232	Nucleoside diphosphate kinase 3 OS=Homo sapiens GN=NME3 PE=1 SV=2 - [NDK3_HUMAN]	31.95	1	1	3	4	0	0	0	9.87047e+06	0																													2.0448	14.2	1	1					0	7.69
P25786	Proteasome subunit alpha type-1 OS=Homo sapiens GN=PSMA1 PE=1 SV=1 - [PSA1_HUMAN]	31.94	4	3	7	16	0	1.64735e+06	3.55577e+06	6.27546e+06	5.44004e+06	0	2.66	1	1									0	10.27	1	1					0	10.27	1	2					0	3.42	1	1					0	6.84
F5GXB3	Uncharacterized protein OS=Homo sapiens GN=KIN PE=4 SV=1 - [F5GXB3_HUMAN]	31.94	6	1	10	25	473886	1.43424e+06	2.20584e+07	1.30271e+07	1.49292e+07					3.90865	10.07	3	3					7.11043	12.85	3	5					3.66665	12.5	3	4					1.61479	8.68	2	2					2.12265	4.51
E7ERS3	Uncharacterized protein OS=Homo sapiens GN=ZC3H18 PE=4 SV=1 - [E7ERS3_HUMAN]	31.93	4	1	27	52	510219	515812	2.28538e+06	1.21949e+07	5.55692e+07					0	5.32	4	5					1.75202	8.6	5	6					0	5.32	4	4	21.45	1.43	1	2	7.92365	15.66	10	12					5.36652	12.69
P17858	6-phosphofructokinase, liver type OS=Homo sapiens GN=PFKL PE=1 SV=6 - [K6PL_HUMAN]	31.92	3	5	22	52	3.74827e+06	876442	614724	2.40471e+07	3.89051e+07					0	1.41	1	1					1.73839	6.54	3	3					0	4.74	3	3	32.24	7.31	5	7	7.12827	4.87	3	5	0	3.46	3	5	7.16461	12.69
O94832	Myosin-Id OS=Homo sapiens GN=MYO1D PE=1 SV=2 - [MYO1D_HUMAN]	31.91	1	2	25	50	2.94727e+06	1.17113e+07	3.20035e+06	1.29903e+08	3.01691e+06	39.2	1.99	2	2	2.72396	5.67	3	3	42.39	2.88	3	3	2.93929	3.98	3	3	41.3	1.99	2	3	2.95317	7.55	5	5	95.9	3.98	4	5	10.1779	11.73	10	13					0	1.09
P60228	Eukaryotic translation initiation factor 3 subunit E OS=Homo sapiens GN=EIF3E PE=1 SV=1 - [EIF3E_HUMAN]	31.91	5	3	13	20	0	0	301426	7.28417e+06	5.14272e+06					0	1.8	1	1					0	3.6	1	1	27.82	2.47	1	1	4.3147	13.93	5	7	73.39	4.27	1	1	7.02616	16.85	5	6					0	2.02
P26440	Isovaleryl-CoA dehydrogenase, mitochondrial OS=Homo sapiens GN=IVD PE=1 SV=1 - [IVD_HUMAN]	31.91	3	4	12	19	0	861566	238418	2.07714e+07	5.38636e+06													0	10.17	2	2					1.93368	9.22	2	2					1.69392	12.29	3	4					1.82259	6.86
Q86Y39	NADH dehydrogenase [ubiquinone] 1 alpha subcomplex subunit 11 OS=Homo sapiens GN=NDUFA11 PE=1 SV=3 - [NDUAB_HUMAN]	31.91	3	3	3	10	0	266904	0	0	9.44763e+06													2.18017	21.28	2	2					0	13.48	1	1													5.24869	18.44
Q6ZMW2	Zinc finger protein 782 OS=Homo sapiens GN=ZNF782 PE=2 SV=1 - [ZN782_HUMAN]	31.9	2	1	20	42	1.37594e+06	3.07489e+06	735238	3.89732e+07	3.36077e+07					3.34113	17.88	8	9					0	11.87	5	7					0	8.58	4	4	0	0.86	1	3	0	8.01	4	5					0	10.01
Q9H3E2	Sorting nexin-25 OS=Homo sapiens GN=SNX25 PE=1 SV=2 - [SNX25_HUMAN]	31.9	1	1	23	41	3.05235e+06	4.67523e+06	993781	2.1377e+07	4.70553e+07					0	10.24	3	3					0	6.9	5	5					0	13.81	6	6					0	2.62	2	2					0	1.9
Q9UKX3	Myosin-13 OS=Homo sapiens GN=MYH13 PE=1 SV=2 - [MYH13_HUMAN]	31.89	8	1	61	112	8.64455e+06	1.04139e+07	1.10141e+07	2.87898e+07	2.15493e+07	0	0.36	1	4	9.4824	7.02	11	15					5.91102	8.05	13	16	0	1.44	3	5	7.45841	7.95	12	13					1.74227	3.77	6	7	0	0.31	1	1	2.15795	10.32
Q86YS3	Rab11 family-interacting protein 4 OS=Homo sapiens GN=RAB11FIP4 PE=1 SV=1 - [RFIP4_HUMAN]	31.87	2	1	16	31	0	1.01505e+06	0	2.53072e+07	1.00064e+07					0	3.3	2	2	0	1.1	1	1	0	9.73	3	3													3.47143	12.09	5	7					1.67972	8.48
Q86W42-2	Isoform 2 of THO complex subunit 6 homolog OS=Homo sapiens GN=THOC6 - [THOC6_HUMAN]	31.86	3	1	5	7	0	0	111464	5.12131e+06	6258704													0	12.93	1	1					1.61861	15.14	3	3					0	4.42	1	1					0	4.42
Q8N6N6	Protein GTLF3B OS=Homo sapiens GN=GTLF3B PE=2 SV=2 - [GTL3B_HUMAN]	31.86	1	1	2	4	0	0	0	0	0																																					1.73985	17.7
C9JDE9	Uncharacterized protein OS=Homo sapiens GN=ACAA1 PE=3 SV=1 - [C9JDE9_HUMAN]	31.85	4	2	9	24	6.22928e+06	4.59742e+06	6.76453e+06	1.58801e+08	1.76484e+07					0	11.75	3	5	21.26	6.27	2	2	2.15022	7.57	2	2					1.73976	3.92	2	2					1.88529	12.01	3	5					0	5.22
B4DS09	Uncharacterized protein OS=Homo sapiens GN=BRD3 PE=2 SV=1 - [B4DS09_HUMAN]	31.85	1	1	10	10	0	0	622600	2.59878e+06	1.08816e+07																					0	5.19	1	1					0	9.88	3	3					1.66891	11.6
Q13439-4	Isoform 4 of Golgin subfamily A member 4 OS=Homo sapiens GN=GOLGA4 - [GOGA4_HUMAN]	31.82	6	2	72	110	2.5557e+06	3.17457e+06	1.60848e+06	3.83673e+07	5.20863e+07					5.75718	4.89	8	10					1.78086	5.07	9	10					0	8.12	12	13					5.45447	6.55	11	14					5.11888	7.9
Q15542-2	Isoform Short of Transcription initiation factor TFIID subunit 5 OS=Homo sapiens GN=TAF5 - [TAF5_HUMAN]	31.81	2	1	15	18	1.43345e+06	699506	0	2.62449e+07	0					0	8.86	3	3					2.29412	7.25	3	3					0	1.74	1	1					0	11.68	4	4					0	1.48
Q969G5	Protein kinase C delta-binding protein OS=Homo sapiens GN=PRKCDBP PE=1 SV=3 - [PRDBP_HUMAN]	31.8	2	6	7	69	0	724330	657456	3.61149e+07	3.62596e+07													0	14.56	3	3	0	4.21	1	3	4.60787	8.81	2	5	306.728	22.22	5	12	36.7853	26.05	6	14	325.94	21.46	5	11	32.4411	26.05
O00499-9	Isoform BIN1-10-13 of Myc box-dependent-interacting protein 1 OS=Homo sapiens GN=BIN1 - [BIN1_HUMAN]	31.78	11	2	11	23	547060	5.39525e+06	1.35037e+06	2.83193e+08	9.16361e+06					0	5.62	2	4					0	11.98	2	2					0	6.11	3	3					0	4.65	3	4					0	6.85
P46063	ATP-dependent DNA helicase Q1 OS=Homo sapiens GN=RECQL PE=1 SV=3 - [RECQ1_HUMAN]	31.74	6	3	18	42	407561	1.26415e+06	934983	3.90512e+07	1.17518e+07					0	9.24	4	4					0	12.02	5	6					0	4.62	3	3					0	9.71	4	7					0	6.16
P19784	Casein kinase II subunit alpha' OS=Homo sapiens GN=CSNK2A2 PE=1 SV=1 - [CSK22_HUMAN]	31.71	1	2	10	21	3.01447e+06	6.5647e+06	0	1.14985e+07	0					2.37171	13.71	4	4					0	18	4	5									29.16	1.71	1	2	0	5.43	2	3					1.60907	1.71
Q6P0N0	Mis18-binding protein 1 OS=Homo sapiens GN=MIS18BP1 PE=1 SV=1 - [M18BP_HUMAN]	31.71	3	1	33	75	5.5757e+06	7.29051e+06	5.39479e+06	3.03434e+07	1.02922e+08					1.67766	2.74	3	6	0	0.71	1	1	3.38598	12.63	10	11					1.75817	6.18	5	10	0	2.21	3	4	1.61714	12.99	11	12					0	5.74
E7EP42	Uncharacterized protein OS=Homo sapiens GN=TIMM23B PE=4 SV=2 - [E7EP42_HUMAN]	31.71	5	1	2	3	0	0	4.69808e+06	0	0																					0	17.89	1	1
P31146	Coronin-1A OS=Homo sapiens GN=CORO1A PE=1 SV=4 - [COR1A_HUMAN]	31.67	1	8	14	88	3.13163e+06	3.15328e+06	2.15331e+06	7.94126e+06	1.34613e+07	64.27	9.33	4	7	9.88669	10.85	5	9	41.0533	15.62	5	9	16.2034	15.62	5	9	56.71	15.62	5	8	16.7522	17.57	6	10	22.47	2.39	1	2	3.85558	4.77	3	4	25.59	2.39	1	2	3.6635	3.9
Q9NSB2	Keratin, type II cuticular Hb4 OS=Homo sapiens GN=KRT84 PE=1 SV=2 - [KRT84_HUMAN]	31.67	11	1	16	161	6.14542e+07	5.8254e+07	5.37167e+07	6.19198e+08	5.09894e+08	73.8495	6.83	5	13	14.5168	12.17	6	13	79.6995	6.83	5	15	13.8673	5	4	12	106.07	8.67	6	16	16.2308	10	7	15	59.3715	6.83	5	14	10.2891	9.33	6	14	55.7919	6.83	5	12	8.85682	10.67
B4DQU7	cDNA FLJ55032, highly similar to Caspase-7 (EC 3.4.22.-) OS=Homo sapiens PE=2 SV=1 - [B4DQU7_HUMAN]	31.65	4	1	7	8	1.61414e+06	1.46951e+06	0	1.72874e+08	0					0	4.68	1	1					0	11.15	2	2					0	6.12	1	1					0	9.35	2	2
Q14204	Cytoplasmic dynein 1 heavy chain 1 OS=Homo sapiens GN=DYNC1H1 PE=1 SV=5 - [DYHC1_HUMAN]	31.64	1	47	126	338	5.57668e+06	5.62044e+06	4.59152e+06	1.32261e+08	259143371	84.82	0.9	4	6	10.2705	4.69	15	18	116.01	1.38	7	10	18.62	6.13	19	24	155.91	1.1	5	8	13.971	4.93	16	19	231.956	4.28	18	27	56.7898	8.95	32	46	174.86	3.81	17	24	52.0752	8.27
Q96NE9-2	Isoform 2 of FERM domain-containing protein 6 OS=Homo sapiens GN=FRMD6 - [FRMD6_HUMAN]	31.6	3	1	17	35	4.83984e+06	6.64394e+06	3.09877e+06	2.42791e+07	3.15935e+07					1.6131	9.61	4	5					0	3.58	2	2					0	15.96	7	7					1.68212	8.96	6	7					0	12.87
Q15661-2	Isoform 2 of Tryptase alpha/beta-1 OS=Homo sapiens GN=TPSAB1 - [TRYB1_HUMAN]	31.58	7	4	7	134	4.91924e+06	7.12696e+06	4.23629e+06	1.74014e+08	1.43922e+08	85.9	8.65	2	7	21.7026	16.92	4	11	41.9879	13.16	3	7	15.0046	13.16	3	8	76.0972	13.16	3	9	15.425	13.16	3	9	125.087	18.42	4	13	22.2893	18.42	4	15	113.556	18.42	4	13	26.3662	22.18
O00232	26S proteasome non-ATPase regulatory subunit 12 OS=Homo sapiens GN=PSMD12 PE=1 SV=3 - [PSD12_HUMAN]	31.58	2	3	14	44	1.08797e+07	1.14743e+07	8.28027e+06	907442160	3.39709e+07					0	12.94	4	6					1.61966	10.31	3	6					1.7051	10.75	4	6					3.66783	7.89	3	8	22.44	4.39	2	2	2.99847	16.45
O94760	N(G),N(G)-dimethylarginine dimethylaminohydrolase 1 OS=Homo sapiens GN=DDAH1 PE=1 SV=3 - [DDAH1_HUMAN]	31.58	4	3	11	50	1.43234e+07	2.10748e+06	5.13063e+06	5.94665e+07	8.71112e+07					0	9.47	2	2					1.62102	11.58	3	5					1.75908	8.42	3	3					0	11.58	3	5					0	15.09
P50416	Carnitine O-palmitoyltransferase 1, liver isoform OS=Homo sapiens GN=CPT1A PE=1 SV=2 - [CPT1A_HUMAN]	31.57	2	2	20	66	7.9274e+06	9.08223e+06	1.02032e+07	4.52981e+08	2.79409e+08					3.6345	12.16	7	11					0	14.88	8	10					0	11.64	5	6					3.44005	8.02	4	9					0	9.06
Q92576-2	Isoform 2 of PHD finger protein 3 OS=Homo sapiens GN=PHF3 - [PHF3_HUMAN]	31.57	6	2	47	71	965480	3.23719e+06	1.52653e+06	6.27286e+07	18652692					1.78849	8.41	8	8					2.42518	7.43	9	9					2.16577	4	4	4					3.70247	8.46	14	16					0	6.61
P20807	Calpain-3 OS=Homo sapiens GN=CAPN3 PE=1 SV=2 - [CAN3_HUMAN]	31.55	4	1	18	34	514231	865549	2.06234e+06	1.39036e+07	3.8561e+07					0	10.96	3	5					0	10.96	4	5					1.77812	7.31	2	2					1.66898	10.23	5	5					1.75988	12.91
Q06265-3	Isoform 3 of Exosome complex component RRP45 OS=Homo sapiens GN=EXOSC9 - [EXOS9_HUMAN]	31.55	5	1	8	12	1.33193e+06	0	0	8.44268e+06	3.7576e+07					0	4.23	1	1					0	4.79	1	1													0	4.23	1	1					0	7.61
Q7Z794	Keratin, type II cytoskeletal 1b OS=Homo sapiens GN=KRT77 PE=1 SV=3 - [K2C1B_HUMAN]	31.49	9	1	16	142	2.30086e+07	2.1446e+07	5.04944e+06	1.41541e+08	1.20809e+08	121.623	7.27	5	9	13.3462	19.9	8	12	132.034	7.27	5	13	18.8952	17.13	7	11	113.922	4.67	3	6	15.5237	6.75	4	7	145.33	6.23	4	11	24.917	15.57	7	16	132.261	6.23	4	13	26.7246	10.9
E9PBS1	Uncharacterized protein OS=Homo sapiens GN=PAICS PE=4 SV=1 - [E9PBS1_HUMAN]	31.48	4	3	10	24	0	775487	3.15437e+06	42084967	3.00427e+07					0	4.84	1	1					0	4.84	1	1					0	2.66	1	1					0	8.47	2	3					0	8.23
B4DKX0	Uncharacterized protein OS=Homo sapiens GN=SP4 PE=2 SV=1 - [B4DKX0_HUMAN]	31.47	1	1	2	9	1.63709e+06	1.5808e+06	1.68628e+06	1.3537e+07	0					2.55106	31.47	2	3					0	10.49	1	2					0	10.49	1	2					0	10.49	1	1					2.26177	20.98
F5H2B3	Uncharacterized protein OS=Homo sapiens GN=FMOD PE=4 SV=1 - [F5H2B3_HUMAN]	31.47	3	1	4	8	1.40802e+06	0	0	0	0					0	6.6	1	1					0	6.6	1	1					0	6.6	1	1					0	19.29	1	1					0	6.6
P63167	Dynein light chain 1, cytoplasmic OS=Homo sapiens GN=DYNLL1 PE=1 SV=1 - [DYL1_HUMAN]	31.46	4	2	4	38	978343	1.06398e+06	1.13463e+06	2.66858e+07	2.84353e+07					6.33412	20.22	2	4	28.64	12.36	1	2	4.71204	12.36	1	2	32.39	20.22	2	4	7.36368	20.22	2	4	26.56	7.87	1	2	3.74983	14.61	2	3	59.82	20.22	2	4	7.88694	25.84
Q92522	Histone H1x OS=Homo sapiens GN=H1FX PE=1 SV=1 - [H1X_HUMAN]	31.46	1	2	7	11	0	1.94526e+06	5.33906e+06	1.40224e+07	0					0	4.69	1	1					0	6.1	1	1					0	11.27	1	1					0	16.9	2	2
Q9NZ08	Endoplasmic reticulum aminopeptidase 1 OS=Homo sapiens GN=ERAP1 PE=1 SV=3 - [ERAP1_HUMAN]	31.46	2	5	20	68	8.52471e+06	2.85908e+06	1.98114e+06	1.23591e+08	1.23888e+08					0	2.76	1	1					0	6.91	4	4					1.83944	7.97	4	4	104.993	6.48	5	8	16.3545	13.07	8	14	111.63	4.68	3	6	14.6913	10.52
Q9UJZ1	Stomatin-like protein 2 OS=Homo sapiens GN=STOML2 PE=1 SV=1 - [STML2_HUMAN]	31.46	2	3	12	22	0	0	795134	1.35844e+07	7.54359e+06																					2.03644	8.99	2	2					0	7.3	1	1					0	10.11
E7EPB3	Uncharacterized protein OS=Homo sapiens GN=RPL14 PE=4 SV=1 - [E7EPB3_HUMAN]	31.45	3	1	6	33	1.80761e+06	1.95155e+06	1.53589e+06	1.2785e+07	1.96412e+07	100.48	9.68	1	2	6.72703	9.68	1	2	110.16	9.68	1	2	7.93755	9.68	1	3	123.35	9.68	1	2	7.91276	9.68	1	3	63.01	9.68	1	2	5.95672	22.58	3	4	112.48	9.68	1	2	7.08948	17.74
F5H091	Uncharacterized protein OS=Homo sapiens GN=MCF2 PE=4 SV=1 - [F5H091_HUMAN]	31.43	2	2	20	32	0	632769	1.17519e+06	1.00481e+08	1.42073e+07					0	1.1	1	1					0	7.92	5	5					0	8.16	4	4	0	6.21	3	3	4.13176	15.1	9	10					0	5.48
Q8NC56	LEM domain-containing protein 2 OS=Homo sapiens GN=LEMD2 PE=1 SV=1 - [LEMD2_HUMAN]	31.41	4	2	11	45	473996	811734	803657	1.50668e+07	8.41251e+06	52.62	2.58	1	2	4.75092	12.92	4	5	53.87	2.58	1	2	6.68658	17.3	5	8	22.12	2.58	1	2	3.72946	9.94	3	6					0	10.93	4	5					0	8.55
Q9P2M7	Cingulin OS=Homo sapiens GN=CGN PE=1 SV=2 - [CING_HUMAN]	31.41	2	2	38	105	7.16923e+06	1.61691e+07	3.93574e+06	5.08332e+08	2.23937e+07	36.9552	1.09	2	3	1.85339	7.18	8	9	0	5.18	6	9	3.98566	9.69	11	14	34.8283	1.75	3	5	1.85221	3.01	4	5					6.76253	11.11	14	22					3.5368	9.61
O95678	Keratin, type II cytoskeletal 75 OS=Homo sapiens GN=KRT75 PE=1 SV=2 - [K2C75_HUMAN]	31.4	21	1	19	156	5.35776e+07	3.18656e+07	4.57198e+07	177389747	1.43091e+08	72.1462	7.8	5	9	16.5002	11.43	7	12	110.189	11.07	6	13	17.6066	7.8	5	9	114.587	8.89	6	13	19.131	9.44	6	12	69.6228	6.72	5	11	16.9408	10.71	7	15	73.8239	5.63	4	9	15.3098	14.7
P10074	Zinc finger and BTB domain-containing protein 48 OS=Homo sapiens GN=ZBTB48 PE=1 SV=2 - [ZBT48_HUMAN]	31.4	1	1	19	43	1.20749e+06	1.43853e+06	736218	6.63614e+07	2.62045e+07					0	5.96	4	4					0	4.36	2	3					0	6.83	3	3					3.60997	11.48	7	9					5.76946	7.85
Q13464	Rho-associated protein kinase 1 OS=Homo sapiens GN=ROCK1 PE=1 SV=1 - [ROCK1_HUMAN]	31.39	1	1	44	107	670130	7.37652e+06	4.90761e+06	7.20193e+08	2.79941e+07					0	6.13	8	11					0	10.71	12	13					2.02041	7.61	10	12	0	1.77	3	5	0	6.28	10	14	0	2.36	4	5	3.57914	4.43
Q15435	Protein phosphatase 1 regulatory subunit 7 OS=Homo sapiens GN=PPP1R7 PE=1 SV=1 - [PP1R7_HUMAN]	31.39	4	1	11	28	444058	588911	1.57452e+06	2.39641e+07	4.93134e+07					0	11.11	3	3					0	5.83	2	2					0	11.94	4	7					2.20934	13.61	4	5					1.72248	6.11
F5GXC8	Uncharacterized protein OS=Homo sapiens GN=SUCLA2 PE=3 SV=1 - [F5GXC8_HUMAN]	31.36	6	3	11	29	2.17574e+06	1.74667e+06	2.7467e+06	8.0261e+06	1.99268e+07					1.78682	5.19	2	4					3.63044	12.1	4	5					1.82972	5.68	2	3					0	2.22	1	1	22.22	6.42	1	1	5.34904	10.62
F8VWL3	Uncharacterized protein OS=Homo sapiens GN=FGD4 PE=4 SV=1 - [F8VWL3_HUMAN]	31.34	6	3	19	36	0	1.21171e+06	1.12054e+07	1.15539e+07	4.68378e+06					1.60179	4.1	2	3					4.86811	13.29	6	7					1.71737	12.07	6	6					1.61163	9.41	6	6					0	2.33
O60242	Brain-specific angiogenesis inhibitor 3 OS=Homo sapiens GN=BAI3 PE=1 SV=2 - [BAI3_HUMAN]	31.34	2	1	31	65	8.53793e+06	1.34279e+07	2.11915e+06	3.48684e+07	1.65706e+07					0	5.98	4	5					0	9.46	10	12					1.85244	4.53	6	6					0	4.73	4	4					0	12.42
Q9NPI1	Bromodomain-containing protein 7 OS=Homo sapiens GN=BRD7 PE=1 SV=1 - [BRD7_HUMAN]	31.34	2	1	15	35	730303	1.61847e+07	9.22488e+06	6.72986e+07	192950943					1.60745	12.44	4	5	0	1.54	1	2	1.82259	5.22	3	3	0	1.54	1	3	1.71768	14.44	7	8	0	1.54	1	2	1.93258	7.53	4	5					3.49607	1.54
P08123	Collagen alpha-2(I) chain OS=Homo sapiens GN=COL1A2 PE=1 SV=7 - [CO1A2_HUMAN]	31.33	3	11	32	307	2.3488e+07	2.28593e+07	1.7103e+07	5.19235e+08	5.05673e+08	325.551	5.86	7	18	44.5222	11.71	11	26	269.143	5.86	7	18	46.8769	12.01	12	29	233.897	6.44	8	19	43.8251	10.32	11	25	377.401	7.98	10	27	68.2988	12.45	13	41	389.08	7.61	9	27	65.2338	16.98
B4DHN0	Uncharacterized protein OS=Homo sapiens GN=MAPK1 PE=2 SV=1 - [B4DHN0_HUMAN]	31.32	5	2	9	25	0	0	0	7.46334e+06	0	66.54	4.31	1	1	3.7867	4.31	1	1	29.17	4.31	1	1	3.00755	4.31	1	1	56.18	4.31	1	1	3.91552	4.31	1	1	82.89	6.9	2	3	4.28189	15.23	4	4	66.76	4.31	1	1	2.83661	4.31
B4E0X8	Uncharacterized protein OS=Homo sapiens GN=FUBP1 PE=2 SV=1 - [B4E0X8_HUMAN]	31.32	8	3	15	41	0	0	0	4.47943e+07	3.64449e+07					3.34574	2.38	1	2					1.77803	6.84	2	2					1.91912	6.84	2	2					4.13646	18.76	8	10	0	1.43	1	2	8.93197	20.03
B9A064	Immunoglobulin lambda-like polypeptide 5 OS=Homo sapiens GN=IGLL5 PE=2 SV=2 - [IGLL5_HUMAN]	31.31	2	3	5	228	2.31278e+06	3.34055e+06	1.91353e+06	3.41769e+07	4.42409e+07	288.183	24.3	4	15	40.0821	24.3	4	15	231.923	24.3	4	16	44.4898	24.3	4	16	189.656	24.3	4	16	45.1858	24.3	4	18	307.066	24.3	4	18	53.818	24.3	4	20	287.14	24.3	4	16	44.4168	24.3
A8MVQ8	Geranylgeranyl diphosphate synthase 1, isoform CRA_b OS=Homo sapiens GN=GGPS1 PE=2 SV=1 - [A8MVQ8_HUMAN]	31.3	4	1	5	5	0	0	0	3.62488e+06	0													0	7.72	1	1													2.09031	24.8	3	3
O43390	Heterogeneous nuclear ribonucleoprotein R OS=Homo sapiens GN=HNRNPR PE=1 SV=1 - [HNRPR_HUMAN]	31.28	5	3	18	48	0	767882	4.4547e+06	1.96734e+07	5.99713e+07					0	1.74	1	1					1.62011	5.06	3	4					3.64027	8.53	4	5					0	5.37	3	4					1.66753	17.22
P41279-2	Isoform 2 of Mitogen-activated protein kinase kinase kinase 8 OS=Homo sapiens GN=MAP3K8 - [M3K8_HUMAN]	31.28	2	1	9	33	1.43173e+07	3.85683e+07	3.32347e+07	3.69071e+07	1.71795e+07					0	11.19	2	7					0	7.31	1	2					0	7.31	1	4					3.29184	19.63	5	5					1.96768	22.37
Q6J9G0	Tyrosine-protein kinase STYK1 OS=Homo sapiens GN=STYK1 PE=2 SV=4 - [STYK1_HUMAN]	31.28	1	1	10	19	174622	7.74889e+06	0	1.15359e+08	0					1.64917	15.64	4	5					0	3.79	2	2													0	14.22	5	7
B1AL16	Family with sequence similarity 178, member A OS=Homo sapiens GN=FAM178A PE=4 SV=1 - [B1AL16_HUMAN]	31.27	1	1	18	26	7.1026e+06	9.43076e+06	5.53971e+06	1.2871e+08	1.1377e+08					0	6.86	3	3					0	2.9	2	2					1.705	5.94	3	3					1.82188	5.15	4	5					3.42255	5.8
Q8TC41	Probable E3 ubiquitin-protein ligase RNF217 OS=Homo sapiens GN=RNF217 PE=2 SV=3 - [RN217_HUMAN]	31.27	1	1	4	15	0	0	0	2.21381e+08	1.53986e+08					0	9.09	1	1					0	13.45	1	1													1.76665	4.36	1	5					0	4.36
Q53GS7	Nucleoporin GLE1 OS=Homo sapiens GN=GLE1 PE=1 SV=2 - [GLE1_HUMAN]	31.23	2	2	20	37	834827	80982.1	646904	2.2864e+07	1.53306e+07					0	6.73	4	4					0	3.87	2	2					0	6.88	5	5					0	9.74	6	6					3.66444	11.03
O95985	DNA topoisomerase 3-beta-1 OS=Homo sapiens GN=TOP3B PE=1 SV=1 - [TOP3B_HUMAN]	31.21	1	1	16	24	1.32135e+06	634025	671689	8.11701e+06	1.62401e+07					1.748	9.05	4	4					0	12.06	4	4					0	9.51	3	3					0	7.19	3	3					0	8
Q7L576	Cytoplasmic FMR1-interacting protein 1 OS=Homo sapiens GN=CYFIP1 PE=1 SV=1 - [CYFP1_HUMAN]	31.21	4	2	27	78	4.83664e+06	5.00945e+06	3.14967e+06	2.67665e+07	1.6444e+07					0	6.78	5	5					0	4.95	4	7					2.02668	5.83	6	9	44.54	2.15	3	4	10.6301	7.42	7	10	29.16	1.6	2	4	7.31018	9.18
F8W8M4	Uncharacterized protein OS=Homo sapiens GN=ABLIM1 PE=4 SV=1 - [F8W8M4_HUMAN]	31.2	3	1	15	46	248260	3.26067e+06	2.59536e+06	7.57529e+07	3.10065e+07					0	10.45	4	7					0	6.27	2	3					0	11.7	5	11					0	7.1	4	6					0	13.23
Q01740	Dimethylaniline monooxygenase [N-oxide-forming] 1 OS=Homo sapiens GN=FMO1 PE=2 SV=3 - [FMO1_HUMAN]	31.2	3	2	12	27	932846	2.35131e+06	1.01469e+06	2.09806e+07	2.02383e+07					0	6.77	3	5					1.60263	3.76	2	3					0	11.65	3	3					1.83965	7.71	3	5					1.61697	7.71
B7ZKM0	SART3 protein OS=Homo sapiens GN=SART3 PE=2 SV=1 - [B7ZKM0_HUMAN]	31.18	21	2	27	47	1.04886e+07	8.35344e+06	9.00251e+06	2.23698e+07	5.09154e+07	0	1.83	1	1	0	7.87	5	5	0	2.48	2	2	0	6.26	4	4	0	0.65	1	3	0	2.91	2	2					0	2.37	2	2					0	6.15
P78332	RNA-binding protein 6 OS=Homo sapiens GN=RBM6 PE=1 SV=5 - [RBM6_HUMAN]	31.17	4	1	29	38	817398	337879	9.39647e+06	8.85897e+07	4.22092e+07					0	4.9	4	5					0	4.99	3	3					0	5.43	4	4					0	6.5	5	5					0	8.37
Q86Y82	Syntaxin-12 OS=Homo sapiens GN=STX12 PE=1 SV=1 - [STX12_HUMAN]	31.16	3	3	6	24	0	0	849670	4.28728e+06	4.39455e+06													0	9.06	1	1					0	2.17	1	2	32.3	5.43	1	2	4.89899	8.7	2	3					6.26964	8.7
Q63ZY3	KN motif and ankyrin repeat domain-containing protein 2 OS=Homo sapiens GN=KANK2 PE=1 SV=1 - [KANK2_HUMAN]	31.14	3	11	23	118	6.37042e+06	7.36929e+06	1.39754e+07	1.39617e+08	6.17485e+07	69.75	7.64	4	7	14.7789	11.4	5	7	146.4	7.64	4	7	23.4533	10.34	6	10	125.024	10.11	6	10	17.9277	12.1	7	9	133.159	7.99	6	12	25.7067	16.1	10	16	190.823	9.87	7	13	30.6106	21.15
Q9Y2R0	Coiled-coil domain-containing protein 56 OS=Homo sapiens GN=CCDC56 PE=1 SV=1 - [CCD56_HUMAN]	31.13	1	1	3	8	0	0	0	9.04682e+06	0					0	13.21	1	1																					3.31594	9.43	1	2
P43307	Translocon-associated protein subunit alpha OS=Homo sapiens GN=SSR1 PE=1 SV=3 - [SSRA_HUMAN]	31.12	8	5	6	87	1.14868e+06	0	2.44141e+06	6.04598e+07	5.37429e+07	141.76	18.18	3	5	15.6658	18.18	3	5	167.23	14.34	2	5	18.1383	14.34	2	5	155.1	18.18	3	5	17.8859	18.18	3	6	155.48	11.89	3	6	16.7272	11.89	3	6	232.546	11.89	3	10	29.9343	13.99
P43121	Cell surface glycoprotein MUC18 OS=Homo sapiens GN=MCAM PE=1 SV=2 - [MUC18_HUMAN]	31.11	2	10	20	157	2.105e+06	3.30686e+06	2.31112e+06	3.11939e+07	2.85497e+07	137.597	9.13	5	9	24.2959	12.23	7	13	113.417	12.54	6	10	29.8039	18.42	9	15	170.634	9.91	5	10	35.405	15.48	11	17	375.841	17.49	8	14	42.6927	20.28	10	17	234.071	14.55	8	13	30.4181	15.79
Q8N1V2-2	Isoform 2 of WD repeat-containing protein 16 OS=Homo sapiens GN=WDR16 - [WDR16_HUMAN]	31.11	3	1	17	23	1.19863e+06	1.62446e+06	1.42412e+06	2.12058e+07	2.27971e+07					0	5.24	3	3					0	6.03	2	2					0	12.7	5	5					0	5.71	3	3					0	6.03
B1AH77	Ras-related C3 botulinum toxin substrate 2 (Rho family, small GTP binding protein Rac2) OS=Homo sapiens GN=RAC2 PE=3 SV=1 - [B1AH77_HUMAN]	31.08	7	3	4	21	4.24435e+06	2.14252e+06	459319	1.57931e+07	8.44805e+06	43.1235	10.81	2	3	6.38207	10.81	2	3	28.95	5.41	1	2	4.50134	5.41	1	2	20.07	5.41	1	1	1.68406	5.41	1	1					4.11279	9.46	1	2	39.35	14.86	2	3	7.3819	14.86
P07339	Cathepsin D OS=Homo sapiens GN=CTSD PE=1 SV=1 - [CATD_HUMAN]	31.07	4	8	12	143	5.02751e+06	2.54007e+06	2.03351e+06	6.48593e+07	5.46763e+07	62.59	4.37	1	2	7.36272	12.38	4	9	52.97	4.37	1	2	6.80558	6.8	2	5	47	4.37	1	2	10.64	14.81	4	9	160.68	15.53	5	11	23.8568	19.66	7	16	195.15	15.53	5	13	33.7461	20.39
F5GZM6	Uncharacterized protein OS=Homo sapiens GN=ZNF701 PE=4 SV=1 - [F5GZM6_HUMAN]	31.07	2	1	16	35	0	1.13682e+06	1.5646e+06	3.08534e+07	2.13015e+08					1.89386	12.43	4	5					0	14.5	6	9					2.12424	8.29	3	3					0	2.64	1	2					0	9.79
P42167	Lamina-associated polypeptide 2, isoforms beta/gamma OS=Homo sapiens GN=TMPO PE=1 SV=2 - [LAP2B_HUMAN]	31.06	3	6	11	47	562074	1.78925e+06	793654	1.86147e+07	1.15347e+07	34.53	5.73	1	1	7.15967	12.78	4	5	35.39	10.79	2	5	18.6429	14.32	4	7					5.66807	7.05	2	3	29.51	3.52	1	1	0	8.59	3	3					0	5.07
Q16853	Membrane primary amine oxidase OS=Homo sapiens GN=AOC3 PE=1 SV=3 - [AOC3_HUMAN]	31.06	3	14	20	350	5.63722e+06	6.37491e+06	4.82709e+06	9.47574e+07	7.6081e+07	497.724	17.3	11	27	81.5951	19.53	12	31	570.741	17.3	11	36	87.8517	18.22	13	38	557.172	16.51	10	32	90.8595	21.49	14	39	322.248	14.81	11	26	58.9207	13.76	10	27	435.843	14.15	10	24	63.2742	17.82
F8VXS0	Uncharacterized protein OS=Homo sapiens PE=4 SV=1 - [F8VXS0_HUMAN]	31.06	3	1	7	20	1.80549e+06	0	1.38854e+06	2.79808e+07	2.89282e+07					0	11.49	2	4					0	8.51	1	1					0	11.49	2	3					0	11.49	2	5					0	16.6
Q96A33-2	Isoform 2 of Coiled-coil domain-containing protein 47 OS=Homo sapiens GN=CCDC47 - [CCD47_HUMAN]	31.04	2	2	15	50	4.90279e+06	1.49141e+06	734956	1.83464e+07	1.57127e+07	179.817	5.21	2	4	12.0414	9.38	4	8	102.07	5.21	2	3	6.61843	7.71	3	6	118.683	7.29	2	3	11.7027	21.04	8	11					0	5.83	2	3					0	5.83
P0CW71	Putative metaphase chromosome protein 1 OS=Homo sapiens GN=HSMCR30 PE=5 SV=1 - [MCP1_HUMAN]	31.03	1	1	8	21	837611	7.88849e+06	2.07186e+06	1.16356e+07	9.83442e+06					1.67823	5.52	1	2					1.7641	12.07	2	2					0	15.52	3	5					1.80981	6.55	2	2					0	7.24
Q6NS38	Alpha-ketoglutarate-dependent dioxygenase alkB homolog 2 OS=Homo sapiens GN=ALKBH2 PE=1 SV=1 - [ALKB2_HUMAN]	31.03	5	1	6	14	782967	0	0	2.19427e+07	1.05179e+07					0	25.29	3	3					0	17.24	2	2									29.43	3.07	1	2	2.07288	3.07	1	2	33.7	3.07	1	2	1.68455	6.9
P05060	Secretogranin-1 OS=Homo sapiens GN=CHGB PE=1 SV=2 - [SCG1_HUMAN]	31.02	1	1	15	28	1.57886e+06	549584	9.9912e+06	35534138	2.18875e+07					0	13.44	5	5					0	7.53	2	2					3.30383	6.79	3	4					1.6257	7.24	3	5	45.16	2.07	1	1	3.3728	7.24
P45974-2	Isoform Short of Ubiquitin carboxyl-terminal hydrolase 5 OS=Homo sapiens GN=USP5 - [UBP5_HUMAN]	31.02	2	1	16	27	2.76148e+06	1.13778e+07	1.0993e+06	9.96702e+06	17587194					0	1.8	1	1					0	3.23	2	2					0	12.22	5	5					0	7.43	3	4					0	4.55
A6NFM2	Pyrroline-5-carboxylate reductase OS=Homo sapiens GN=PYCR1 PE=3 SV=1 - [A6NFM2_HUMAN]	31.01	4	2	7	17	0	0	236453	0	0					0	1.9	1	1					0	9.18	1	1					0	12.97	3	3
Q9Y4I1-3	Isoform 3 of Myosin-Va OS=Homo sapiens GN=MYO5A - [MYO5A_HUMAN]	31.01	7	2	60	110	2.72689e+06	2.70622e+06	3.66258e+06	2.73392e+07	4.91023e+07					5.38213	5.74	9	11					7.09827	9.15	13	17					1.69444	8.51	12	14					3.45799	9.04	14	16					2.35372	8.4
P68402	Platelet-activating factor acetylhydrolase IB subunit beta OS=Homo sapiens GN=PAFAH1B2 PE=1 SV=1 - [PA1B2_HUMAN]	31	4	2	8	25	1.889e+06	552984	0	4.37012e+07	1.82048e+07					0	10.04	2	3					0	13.54	2	3									53.53	6.55	2	3	4.75872	17.47	3	5	79.01	6.55	2	4	5.94668	13.97
E9PPJ0	Uncharacterized protein OS=Homo sapiens GN=SF3B2 PE=4 SV=1 - [E9PPJ0_HUMAN]	30.98	3	5	30	93	3.29011e+06	1.72731e+06	1.12942e+06	5.85759e+08	1.92035e+07	42.58	2.16	1	1	5.38618	14.81	10	15					3.74113	7.4	5	10	49.23	2.16	1	2	7.98162	10.82	7	10					5.36791	9.11	8	12					0	8.88
O94874	E3 UFM1-protein ligase 1 OS=Homo sapiens GN=KIAA0776 PE=1 SV=2 - [UFL1_HUMAN]	30.98	3	3	25	51	3.19198e+06	2.75236e+06	1.22946e+06	5.00116e+06	22962283					0	13.98	8	9					1.6289	7.3	4	5					0	12.59	6	6					0	9.19	5	6					0	5.54
E9PQW4	Uncharacterized protein OS=Homo sapiens GN=MAPK3 PE=4 SV=1 - [E9PQW4_HUMAN]	30.97	6	1	10	25	2.07598e+06	4.25523e+06	0	2.00592e+07	3.70964e+07	66.54	4.42	1	1	3.7867	13.27	3	4	29.17	4.42	1	1	3.00755	9.14	2	2	56.18	6.49	2	2	3.91552	4.42	1	1	82.89	10.91	3	3	4.28189	11.8	3	3	66.76	6.78	2	2	2.83661	9.14
E9PEZ3	Uncharacterized protein OS=Homo sapiens GN=DIAPH1 PE=4 SV=1 - [E9PEZ3_HUMAN]	30.97	9	2	32	66	1.73207e+06	1.14618e+06	1.30634e+06	5.1611e+07	3.50659e+07					0	7.25	6	7					1.81972	7.8	7	7					0	5.36	4	5	0	0.63	1	2	5.06142	10.09	9	13					1.64018	9.85
[truncated: 2,131 more rows]
[truncated: 21 more columns]

## Sheet: Table S1B
Table S1B. Tumor proteins of three samples.
[truncated: 3,640 more rows]
[truncated: 13 more columns]

## Sheet: Table S1C
Table S1C. dysregulated proteins of No.8 were detected by Progenesis LC-MS software.
[truncated: 665 more rows]

## Sheet: Table S1D
Table S1D. dysregulated proteins of No.9 were detected by Progenesis LC-MS software.
[truncated: 665 more rows]

[truncated: 15 more sheets: Table S1E, Table S1F, Table S1G, Table S2, Table S3A, Table S3B, Table S4A, Table S4B, Table S4C, Table S4D, Table S5, Table S6, Table S7A, Table S7B, Table S7C]
